# Supplementary material for: SV-BR-1-GM, a Clinically Effective GM-CSF-Secreting Breast Cancer Cell Line, Expresses an Immune Signature and Directly Activates CD4+ T Lymphocytes
Source: Front Immunol. 2018 May 15;9:776. doi: 10.3389/fimmu.2018.00776 (PMC5962696; doi:10.3389/fimmu.2018.00776)
Supplement: Data Sheet 1 — Accession numbers and descriptions of normal tissue samples from GEO DataSet GSE7307 used for the in silico verification step of candidate TAAs are shown. [file Data_Sheet_1.XLSX]

## Sheet: GSE7307 Samples Used
SV-BR-1-GM, a Clinically Effective GM-CSF-Secreting Breast Cancer Cell Line, Expresses an Immune Signature and Directly Activates CD4+ T Lymphocytes
Supplementary Data Sheet 1: Normal Tissues
GEO DataSet GSE7307
Accession Number	Description	Group	Group Number	Comments
GSM175837	Adipose Tissue Omental	Adipose	1
GSM176118	Adipose Tissue	Adipose	1
GSM176121	Adipose Tissue Subcutaneous	Adipose	1
GSM176410	Adrenal Gland Cortex	Adrenal Gland	2
GSM176115	Coronary Artery	Artery	3
GSM176264	Aorta	Artery	3
GSM175906	Bone Marrow	Bone Marrow	4
GSM175951	Bone Marrow	Bone Marrow	4
GSM176300	Bone Marrow	Bone Marrow	4
GSM175907	Cerebellum	CNS	7
GSM175909	Fetal Brain	CNS	7
GSM175959	Midbrain	CNS	7
GSM176030	Cerebellar Hemisphere	CNS	7
GSM176031	Cerebellar Vermis	CNS	7
GSM176033	Frontal Cortex	CNS	7
GSM176034	Globus Pallidus	CNS	7
GSM176036	Pons	CNS	7
GSM176037	Prefrontal Cortex	CNS	7
GSM176073	Occipital Lobe	CNS	7
GSM176124	Subthalamic Nucleus	CNS	7
GSM176125	Substantia Nigra	CNS	7
GSM176149	Amygdala	CNS	7
GSM176152	Putamen	CNS	7
GSM176156	Accumbens	CNS	7
GSM176160	Cerebellum	CNS	7
GSM176164	Cerebral Cortex	CNS	7
GSM176168	Corpus Callosum	CNS	7
GSM176173	Frontal Lobe	CNS	7
GSM176177	Hippocampus	CNS	7
GSM176181	Parietal Lobe	CNS	7
GSM176185	Medulla	CNS	7
GSM176215	Temporal Lobe	CNS	7
GSM176217	Thalamus	CNS	7
GSM176223	Ventral Tegmental Area	CNS	7
GSM176233	Hypothalamus	CNS	7
GSM176293	Frontal Cortex	CNS	7
GSM176372	Caudate	CNS	7
GSM176379	Accumbens	CNS	7
GSM176380	Putamen	CNS	7
GSM176403	Substantia Nigra Pars Compacta	CNS	7
GSM176404	Substantia Nigra Reticulata	CNS	7
GSM176446	Globus Pallidum Internal	CNS	7
GSM176448	Globus Pallidum External	CNS	7
GSM176453	Thalamus Subthalamic Nucleus	CNS	7
GSM176454	Thalamus Lateral Nuclei	CNS	7
GSM175792	Breast	Breast	5
GSM175795	Breast	Breast	5
GSM175838	Nipple Cross Section	Breast	5
GSM175839	Nipple Cross Section	Breast	5
GSM175840	Nipple Cross Section	Breast	5
GSM175841	Nipple Cross Section	Breast	5
GSM176122	Mammary Gland	Breast	5
GSM176231	Mammary Gland	Breast	5
GSM176232	Mammary Gland	Breast	5
GSM176140	Cervix	Cervix	6
GSM176098	Endometrium	Endometrium	8
GSM176137	Endometrium	Endometrium	8
GSM176145	Endometrium	Endometrium	8
GSM176392	Esophagus	Esophagus	9
GSM176239	Fallopian Tube	Fallopian Tube	10
GSM176294	Fallopian Tube	Fallopian Tube	10
GSM175905	Colon	Gut	11
GSM175947	Small Intestine	Gut	11
GSM175949	Small Intestine Duodenum	Gut	11
GSM176123	Colon Cecum	Gut	11
GSM176266	Small Intestine Jejunum	Gut	11
GSM175816	Heart Atrium	Heart	12
GSM175819	Heart Ventricle	Heart	12
GSM175935	Heart	Heart	12
GSM176035	Pericardium	Heart	12
GSM176005	T Cells Resting 30h	Immune Cells	13
GSM176006	T Cells AntiCD3 30h	Immune Cells	13
GSM176007	B Cells Resting 30h	Immune Cells	13
GSM176008	B Cells AntiCD40+Il4 30H 2 Activated	Immune Cells	13
GSM176009	Monocytes Resting 30h 2 Resting	Immune Cells	13
GSM176010	Monocytes LPS+Ifng 30h 2 Activated	Immune Cells	13
GSM176282	PBMC PMA+Ionomycin 1 Activated	Immune Cells	13
GSM176283	CD4+ 1 Resting	Immune Cells	13
GSM176284	CD4+ AntiCD3+AntiCD28 1 Activated	Immune Cells	13
GSM176285	CD8+ 1 Resting	Immune Cells	13
GSM176286	CD8+ AntiCD3+AntiCD28 1 Activated	Immune Cells	13
GSM176269	Joint Tissue Synovium	Joint	14
GSM176292	Synovial Membrane	Joint	14
GSM175911	Kidney	Kidney	15
GSM176324	Kidney Cortex	Kidney	15
GSM176427	Kidney Medulla	Kidney	15
GSM175910	Fetal Liver	Liver	16
GSM176335	Liver	Liver	16
GSM175977	Lung	Lung	17
GSM175979	Bronchus	Lung	17
GSM176434	Lymph Nodes	Lymph Node	18
GSM175992	Pharyngeal Mucosa	Mucosa	19
GSM176388	Oral Mucosa	Mucosa	19
GSM175936	Spinal Cord	CNS	7
GSM176072	Nodose Nucleus	CNS	7
GSM176074	Spinal Cord	CNS	7
GSM176075	Dorsal Root Ganglia	CNS	7
GSM176076	Trigeminal Ganglia	CNS	7
GSM176077	Vestibular Nuclei Superior	CNS	7
GSM176136	Ovary	Ovary	20
GSM176318	Ovary	Ovary	20
GSM175950	Pancreas	Pancreas	21
GSM175881	Penis	Penis	22
GSM176274	Penis	Penis	22
GSM176235	Peritoneum	Peritoneum	23	"Peritneum" as in GEO GSE7307 assumed to be typographical error.
GSM176297	Pituitary Gland	Pituitary Gland	24
GSM175937	Placenta	Placenta	25
GSM175923	Prostate	Prostate	26
GSM175938	Prostate	Prostate	26
GSM175955	Prostate	Prostate	26
GSM176278	Prostate	Prostate	26
GSM176241	Retrocervical Infiltrate	Retrocervical Infiltrate	27
GSM175939	Salivary Gland	Salivary Gland	28
GSM176417	Salivary Gland	Salivary Gland	28
GSM175884	Skeletal Muscle	Skeletal Muscle	29
GSM175940	Skeletal Muscle	Skeletal Muscle	29
GSM175985	Superior Quadracep	Skeletal Muscle	29
GSM176317	Deltoid Muscle	Skeletal Muscle	29
GSM175948	Skin	Skin	30
GSM175952	Skin	Skin	30
GSM176267	Skin	Skin	30
GSM175941	Spleen	Spleen	31
GSM176331	Spleen	Spleen	31
GSM175824	Stomach Cardiac	Stomach	32
GSM175943	Stomach	Stomach	32
GSM176339	Stomach Fundus	Stomach	32
GSM176343	Stomach Pyloric	Stomach	32
GSM175942	Testes	Testis	33
GSM176276	Testes	Testis	33
GSM176262	Thymus Gland	Thymus	34
GSM175954	Thyroid Gland	Thyroid Gland	35
GSM176421	Thyroid Gland	Thyroid Gland	35
GSM175899	Tongue Superior With Papillae	Tongue	36
GSM175900	Tongue Main Corpus	Tongue	36
GSM175946	Tongue	Tongue	36
GSM175953	Tongue	Tongue	36
GSM176114	Tonsil	Tonsil	37
GSM175944	Trachea	Trachea	38
GSM175981	Trachea	Trachea	38
GSM176280	Urethra	Urethra	39
GSM175945	Uterus	Uterus	40
GSM176102	Myometrium	Uterus	40
GSM176138	Myometrium	Uterus	40
GSM176230	Myometrium	Uterus	40
GSM176129	Vagina	Vagina	41
GSM176139	Vagina	Vagina	41
GSM175880	Saphenous Vein	Vein	42
GSM176038	Vena Cava	Vein	42
GSM176299	HUVEC Cell Line	Vein	42
GSM176079	Vulva	Vulva	43
GSM176081	Vulva	Vulva	43
