# Supplementary material for: SV-BR-1-GM, a Clinically Effective GM-CSF-Secreting Breast Cancer Cell Line, Expresses an Immune Signature and Directly Activates CD4+ T Lymphocytes
Source: Front Immunol. 2018 May 15;9:776. doi: 10.3389/fimmu.2018.00776 (PMC5962696; doi:10.3389/fimmu.2018.00776)
Supplement: Data Sheet 4 — A list of cancer/testis antigens (CTAs) is provided. [file Data_Sheet_4.XLSX]

## Sheet: CT Antigens
	SV-BR-1-GM, a Clinically Effective GM-CSF-Secreting Breast Cancer Cell Line, Expresses an Immune Signature and Directly Activates CD4+ T Lymphocytes
	Supplementary Data Sheets 4: Cancer/Testis Antigens
	nCounter Human PanCancer Immune Profiling Panel	Dobrynin et al., 2013 (Int J Genomics. 2013;2013:105108)	CT Database www.cta.lncc.br (accessed: 18 Oct 2016)	Chapman et al., 2014 (Biomark Med. 2013;7(4):601-11)		All (nCounter, Dobrynin, CT Database, Chapman)	Official Gene Symbol (NCBI)		Official Gene Symbol (NCBI) Nonredundant	Gene Symbols as on HumanHT-12 v4 Expression BeadChip	Comments
	Gene Symbols as provided	Gene Symbols as provided in Suppl Sheets 1-3	Gene Symbols as provided	Gene Symbols as provided		Gene Symbols as provided
	MAGEA4	ACRBP	MAGEA1	FSIP1		ACRBP	ACRBP		ACRBP	ACRBP
	CT45A1	ACTL8	MAGEA2			ACTL8	ACTL8		ACTL8	ACTL8
	GAGE1	ADAM2	MAGEA3			ADAM2	ADAM2		ADAM2	ADAM2
	MAGEA12	ADAM20	MAGEA4			ADAM20	ADAM20		ADAM20	ADAM20
	BAGE	ADAM21	MAGEA5			ADAM21	ADAM21		ADAM21	ADAM21
	CTCFL	ADAM22	MAGEA6			ADAM22	ADAM22		ADAM22	ADAM22
	CTAG1B	ADAM23	MAGEA8			ADAM23	DAM23		ADAM23	ADAM23
	MAGEB2	ADAM28	MAGEA9			ADAM28	ADAM28		ADAM28	ADAM28
	PRM1	ADAM29	MAGEA10			ADAM29	ADAM29		ADAM29	ADAM29
	SEMG1	AKAP3	MAGEA11			AKAP3	AKAP3		AKAP3	AKAP3
	SYCP1	AKAP4	MAGEA12			AKAP4	AKAP4		AKAP4	AKAP4
	TTK	ANKRD45	BAGE			ANKRD45	ANKRD45		ANKRD30BP2	C21orf99
	MAGEA1	ARMC3	BAGE2			ARMC3	ARMC3		ANKRD45	ANKRD45
	MAGEA3	ARX	BAGE3			ARX	ARX		ARMC3	ARMC3
	MAGEC1	ATAD2	BAGE4			ATAD2	ATAD2		ARX	ARX
	SSX1	ATAD2B	BAGE5			ATAD2B	ATAD2B		ATAD2	ATAD2
	SSX4	BAGE	MAGEB1			BAGE	BAGE		ATAD2B	ATAD2B
	PRAME	BAGE2	MAGEB2			BAGE2	BAGE2		BAGE	BAGE
	TMEFF2	BAGE3	MAGEB5			BAGE3	BAGE3		BAGE2	BAGE2
	MAGEC2	BAGE4	MAGEB6			BAGE4	BAGE4		BAGE3	BAGE3
	SPA17	BAGE5	MAGEB3			BAGE5	BAGE5		BAGE4	BAGE4
	ROPN1	BRDT	MAGEB4			BRDT	BRDT		BAGE5	BAGE5
	PBK	C15orf60	GAGE1			C15orf60	REC114		BRDT	BRDT
	DDX43	C21orf99	GAGE2A			C21orf99	ANKRD30BP2		CABYR	CABYR
	SPANXB1	CABYR	GAGE3			CABYR	CABYR		CAGE1	CAGE1
	CTAGE1	CAGE1	GAGE4			CAGE1	CAGE1		CALR3	CALR3
	PASD1	CALR3	GAGE5			CALR3	CALR3		CCDC110	CCDC110
	SPACA3	CASC5	GAGE6			CASC5	KNL1		CCDC33	CCDC33
	SPO11	CCDC110	GAGE7			CCDC110	CCDC110		CCDC36	CCDC36
	TPTE	CCDC33	GAGE8			CCDC33	CCDC33		CCDC62	CCDC62
		CCDC36	SSX1			CCDC36	CCDC36		CCDC83	CCDC83
		CCDC62	SSX2			CCDC62	CCDC62		CCNA1	CCNA1
		CDCA1	SSX2b			CCDC83	CCDC83		CEP290	CEP290
		CEP290	SSX3			CDCA1	NUF2		CEP55	CEP55
		CEP55	SSX4			CEP290	CEP290		CNOT9	RQCD1
		COX6B2	CTAG1B			CEP55	CEP55		COX6B2	COX6B2
		CPXCR1	LAGE-1b			COX6B2	COX6B2		CPXCR1	CPXCR1
		CRISP2	CTAG2			CPXCR1	CPXCR1		CRISP2	CRISP2
		CSAG1	MAGEC1			CRISP2	CRISP2		CSAG1	CSAG1
		CSAG2	MAGEC3			CSAG1	CSAG1		CSAG2	CSAG2
		CSAG3B	SYCP1			CSAG2	CSAG2		CT45A1	CT45A1
		CT16.2	BRDT			CSAG3B	CSAG2		CT45A2	CT45-2
		CT45A1	MAGEC2			CT16.2	PAGE5		CT45A3	CT45A4
		CT45A2	SPANXA1			CT45A1	CT45A1		CT45A5	CT45A5
		CT45A3	SPANXB1			CT45A2	CT45A2		CT45A6	CT45A6
		CT45A4	SPANXC			CT45A3	CT45A3		CT47A1	CT47A1
		CT45A5	SPANXD			CT45A4	CT45A3		CT47A10	Not found on BeadChip
		CT45A6	SPANXN1			CT45A5	CT45A5		CT47A11	Not found on BeadChip
		CT47A1	SPANXN2			CT45A6	CT45A6		CT47A12	Not found on BeadChip
		CT47A10	SPANXN3			CT47A1	CT47A1		CT47A2	Not found on BeadChip
		CT47A11	SPANXN4			CT47A10	CT47A10		CT47A3	Not found on BeadChip
		CT47A12	SPANXN5			CT47A11	CT47A11		CT47A4	Not found on BeadChip
		CT47A2	XAGE1D			CT47A12	CT47A12		CT47A5	Not found on BeadChip
		CT47A3	XAGE1C			CT47A2	CT47A2		CT47A5	CT47A6
		CT47A4	XAGE1B			CT47A3	CT47A3		CT47A7	CT47A7
		CT47A5	XAGE1			CT47A4	CT47A4		CT47A8	Not found on BeadChip
		CT47A6	XAGE2			CT47A5	CT47A5		CT47A9	Not found on BeadChip
		CT47A7	XAGE3			CT47A6	CT47A6		CT47B1	Not found on BeadChip
		CT47A8	XAGE-3b			CT47A7	CT47A7		CT55	CXorf48
		CT47A9	XAGE-4/RP11-167P23.2			CT47A8	CT47A8		CT62	Not found on BeadChip
		CT47B1	XAGE5			CT47A9	CT47A9		CT83	CXorf61
		CT66/AA884595	DDX43			CT47B1	CT47B1		CTAG1A	CTAG1A
		CT69/BC040308	SAGE1			CT66/AA884595	Not found		CTAG1B	CTAG1B
		CT70/BI818097	ADAM2			CT69/BC040308	Not found		CTAG2	CTAG2
		CTAG1	PAGE5			CT70/BI818097	Not found		CTAGE1	CTAGE1
		CTAG1A	CT16.2			CTAG1	CTAG1B		CTCFL	CTCFL
		CTAG1B	PAGE1			CTAG1A	CTAG1A		CTNNA2	CTNNA2
		CTAG2	PAGE2			CTAG1B	CTAG1B		DCAF12	WDR40A
		CTAGE1	PAGE2B			CTAG2	CTAG2		DDX43	DDX43
		CTAGE-2	PAGE3			CTAGE1	CTAGE1		DDX5	DDX5
		CTAGE5	PAGE4			CTAGE-2	CTAGE1		DDX53	DDX53
		CTCFL	LIPI			CTAGE5	MIA2		DKKL1	DKKL1
		CTNNA2	VENTXP1			CTCFL	CTCFL		DMRT1	DMRT1
		CXorf48	IL13RA2			CTNNA2	CTNNA2		DNAJB8	DNAJB8
		Cxorf61	TSP50			CXorf48	CT55		DPPA2	DPPA2
		cyclin A1	CTAGE1			Cxorf61	CT83		DSCR8	DSCR8
		DCAF12	CTAGE-2			cyclin A1	CCNA1		ELOVL4	ELOVL4
		DDX43	CTAGE5			DCAF12	DCAF12		EPPIN	SPINLW1
		DDX5	SPA17			DDX43	DDX43		FAM133A	FAM133A
		DDX53	ACRBP			DDX5	DDX5		FAM46D	FAM46D
		DKKL1	CSAG1			DDX53	DDX53		FATE1	FATE1
		DPPA2	CSAG2			DKKL1	DKKL1		FBXO39	FBXO39
		DSCR8	DSCR8			DMRT1	DMRT1		FMR1NB	FMR1NB
		ELOVL4	MMA1b			DNAJB8	DNAJB8		FSIP1	FSIP1
		FAM133A	DDX53			DPPA2	DPPA2		FTHL17	FTHL17
		FAM46D	CTCFL			DSCR8	DSCR8		GAGE1	GAGE1
		FATE1	LUZP4			EDAG, NDR	HEMGN		GAGE10	GAGE10
		FBXO39	CASC5			ELOVL4	ELOVL4		GAGE12B	GAGE12B
		FMR1NB	TFDP3			FAM133A	FAM133A		GAGE12C	GAGE12C
		FTHL17	JARID1B			FAM46D	FAM46D		GAGE12D	GAGE12D
		GAGE1	LDHC			FATE1	FATE1		GAGE12E	GAGE12E
		GAGE10	MORC1			FBXO39	FBXO39		GAGE12F	GAGE12F
		GAGE12B	DKKL1			FMR1NB	FMR1NB		GAGE12G	GAGE12G
		GAGE12C	SPO11			FSIP1	FSIP1		GAGE12H	GAGE12H
		GAGE12D	CRISP2			FTHL17	FTHL17		GAGE12I	GAGE12I
		GAGE12E	FMR1NB			GAGE1	GAGE1		GAGE12J	GAGE12J
		GAGE12F	FTHL17			GAGE10	GAGE10		GAGE13	Not found on BeadChip
		GAGE12G	NXF2			GAGE12B	GAGE12B		GAGE2A	GAGE2A
		GAGE12H	TAF7L			GAGE12C	GAGE12C		GAGE3	Not found on BeadChip
		GAGE12I	TDRD1			GAGE12D	GAGE12D		GAGE4	GAGE4
		GAGE12J	TDRD6			GAGE12E	GAGE12E		GAGE5	GAGE5
		GAGE13	TDRD4			GAGE12F	GAGE12F		GAGE6	GAGE6
		GAGE2A	TEX15			GAGE12G	GAGE12G		GAGE7	GAGE7
		GAGE3	FATE1			GAGE12H	GAGE12H		GAGE8	GAGE8
		GAGE4	TPTE			GAGE12I	GAGE12I		GOLGA6L2	Not found on BeadChip
		GAGE5	CT45A1			GAGE12J	GAGE12J		GPAT2	GPAT2
		GAGE6	CT45A2			GAGE13	GAGE13		GPATCH2	GPATCH2
		GAGE7	CT45A3			GAGE2A	GAGE2A		HEMGN	HEMGN
		GAGE8	CT45A4			GAGE3	GAGE3		HORMAD1	HORMAD1
		GOLGAGL2 FA	CT45A5			GAGE4	GAGE4		HORMAD2	HORMAD2
		GPAT2	CT45A6			GAGE5	GAGE5		HSPB9	HSPB9
		GPATCH2	HORMAD1			GAGE6	GAGE6		IGSF11	IGSF11
		HORMAD1	HORMAD2			GAGE7	GAGE7		IL13RA2	IL13RA2
		HSPB9	CT47A1			GAGE8	GAGE8		IMP3	IMP3
		IGSF11	CT47A2			GOLGAGL2 FA	GOLGA6L2		KDM5B	KDM5B
		IL13RA2	CT47A3			GPAT2	GPAT2		KIAA0100	KIAA0100
		IMP3	CT47A4			GPATCH2	GPATCH2		KIF20B	KIF20B
		IMP-3	CT47A5			HIWI, MIWI, PIWI	PIWIL1		KIF2C	KIF2C
		JARID1B	CT47A6			HORMAD1	HORMAD1		KNL1	CASC5
		KIAA0100	CT47A7			HORMAD2	HORMAD2		LDHC	LDHC
		LAGE-1b	CT47A8			HSPB9	HSPB9		LEMD1	LEMD1
		LDHC	CT47A9			IGSF11	IGSF11		LINC01192	Not found on BeadChip	Gene type: ncRNA
		LEMD1	CT47A10			IL13RA2	IL13RA2		LINC01193	Not found on BeadChip	Gene type: ncRNA
		LIPI	CT47A11			IMP3	IMP3		LINC01194	Not found on BeadChip	Gene type: ncRNA
		LOC130576	CT47B1			IMP-3	IMP3		LIPI	LIPI
		LOC196993	SLCO6A1			JARID1B	KDM5B		LOC440934	LOC440934	Gene type: ncRNA
		LOC348120	TAG			KIAA0100	KIAA0100		LUZP4	LUZP4
		LOC440934	LEMD1			LAGE-1b	CTAG2		LY6K	LY6K
		LOC647107	HSPB9			LDHC	LDHC		LYPD6B	LYPD6B
		LOC728137	CCDC110			LEMD1	LEMD1		MAEL	MAEL
		LUZP4	ZNF165			LIPI	LIPI		MAGEA1	MAGEA1
		LY6K	SPACA3			LOC130576	LYPD6B		MAGEA10	MAGEA10
		MAEL	CXorf48			LOC196993	CT62		MAGEA11	MAGEA11
		MAGEA1	THEG			LOC348120	LINC01193		MAGEA12	MAGEA12
		MAGEA10	ACTL8			LOC440934	LOC440934		MAGEA2	MAGEA2
		MAGEA11	NLRP4			LOC647107	LINC01192		MAGEA2B	MAGEA2B
		MAGEA12	COX6B2			LOC728137	TSPY3		MAGEA3	MAGEA3
		MAGEA2	LOC348120			LUZP4	LUZP4		MAGEA4	MAGEA4
		MAGEA2B	CCDC33			LY6K	LY6K		MAGEA5	MAGEA5
		MAGEA3	LOC196993			MAEL	MAEL		MAGEA6	MAGEA6
		MAGEA4	PASD1			MAGEA1	MAGEA1		MAGEA8	MAGEA8
		MAGEA5	LOC647107			MAGEA10	MAGEA10		MAGEA9	MAGEA9
		MAGEA6	TULP2			MAGEA11	MAGEA11		MAGEA9B	MAGEA9B
		MAGEA8	CT66/AA884595			MAGEA12	MAGEA12		MAGEB1	MAGEB1
		MAGEA9	PRSS54			MAGEA2	MAGEA2		MAGEB10	MAGEB10
		MAGEA9B	RBM46			MAGEA2B	MAGEA2B		MAGEB16	MAGEB16
		MAGEA9B/LOC728269	CT69/BC040308			MAGEA3	MAGEA3		MAGEB17	Not found on BeadChip
		MAGEB1	CT70/BI818097			MAGEA4	MAGEA4		MAGEB18	MAGEB18
		MAGEB10	SPINLW1			MAGEA5	MAGEA5		MAGEB2	MAGEB2
		MAGEB16	TSSK6			MAGEA6	MAGEA6		MAGEB3	MAGEB3
		MAGEB17	ADAM29			MAGEA8	MAGEA8		MAGEB4	MAGEB4
		MAGEB18	CCDC36			MAGEA9	MAGEA9		MAGEB5	MAGEB5
		MAGEB2	LOC440934			MAGEA9B	MAGEA9B		MAGEB6	MAGEB6
		MAGEB3	SYCE1			MAGEA9B/LOC728269	MAGEA9B		MAGEC1	MAGEC1
		MAGEB4	CPXCR1			MAGEB1	MAGEB1		MAGEC2	MAGEC2
		MAGEB5	TSPY3			MAGEB10	MAGEB10		MAGEC3	MAGEC3
		MAGEB6	TSGA10			MAGEB16	MAGEB16		MIA2	CTAGE5, MIA2
		MAGEC1	HIWI, MIWI, PIWI			MAGEB17	MAGEB17		MORC1	MORC1
		MAGEC2	PIWIL2			MAGEB18	MAGEB18		MPHOSPH10	MPHOSPH10
		MAGEC3	ARMC3			MAGEB2	MAGEB2		NLRP4	NLRP4
		MCAK	AKAP3			MAGEB3	MAGEB3		NOL4	NOL4
		MMA1b	Cxorf61			MAGEB4	MAGEB4		NR6A1	NR6A1
		MORC1	PBK			MAGEB5	MAGEB5		NUF2	NUF2
		MPHOSPH1	C21orf99			MAGEB6	MAGEB6		NXF2	NXF2
		MPHOSPH10	OIP5			MAGEC1	MAGEC1		NXF2B	NXF2B
		NLRP4	CEP290			MAGEC2	MAGEC2		ODF1	ODF1
		NOL4	CABYR			MAGEC3	MAGEC3		ODF2	ODF2
		NXF2	SPAG9			MCAK	KIF2C		ODF2L	ODF2L
		NXF2B	MPHOSPH1			MMA1b	DSCR8		ODF3	ODF3
		ODF1	ROPN1			MORC1	MORC1		ODF3L1	ODF3L1
		ODF2	PLAC1			MPHOSPH1	KIF20B		ODF3L2	ODF3L2
		ODF2L	CALR3			MPHOSPH10	MPHOSPH10		ODF4	ODF4
		ODF3	PRM1			NLRP4	NLRP4		OIP5	OIP5
		ODF3L1	PRM2			NOL4	NOL4		OTOA	OTOA
		ODF3L2	CAGE1			NR6A1	NR6A1		PAGE1	PAGE1
		ODF4	TTK			NXF2	NXF2		PAGE2	PAGE2
		OIP5	LY6K			NXF2B	NXF2B		PAGE2B	PAGE2B
		OTOA	IMP-3			ODF1	ODF1		PAGE3	PAGE3
		PAGE1	AKAP4			ODF2	ODF2		PAGE4	PAGE4
		PAGE2	DPPA2			ODF2L	ODF2L		PAGE5	PAGE5
		PAGE2B	KIAA0100			ODF3	ODF3		PASD1	PASD1
		PAGE3	DCAF12			ODF3L1	ODF3L1		PBK	PBK
		PAGE4	SEMG1			ODF3L2	ODF3L2		PIWIL1	PIWIL1
		PAGE5	POTED			ODF4	ODF4		PIWIL2	PIWIL2
		PASD	POTEE			OIP5	OIP5		PLAC1	PLAC1
		PASD1	POTEA			OTOA	OTOA		POTEA	POTEA
		PBK	POTEG			PAGE1	PAGE1		POTEB	POTEB
		PEPP2	POTEB			PAGE2	PAGE2		POTEC	POTEC
		PIWIL2	POTEC			PAGE2B	PAGE2B		POTED	POTED
		PLAC1	POTEH			PAGE3	PAGE3		POTEE	POTEE
		POTEA	GOLGAGL2 FA			PAGE4	PAGE4		POTEG	POTEG
		POTEB	CDCA1			PAGE5	PAGE5		POTEH	POTEH
		POTEC	PEPP2			PASD	PASD1		PRAME	PRAME
		POTED	OTOA			PASD1	PASD1		PRAMEF1	PRAMEF1
		POTEE	CCDC62			PBK	PBK		PRAMEF11	PRAMEF11
		POTEG	GPATCH2			PEPP2	RHOXF2		PRM1	PRM1
		POTEH	CEP55			PIWIL2	PIWIL2		PRM2	PRM2
		PRAME	FAM46D			PLAC1	PLAC1		PRSS50	TSP50
		PRAMEF1	TEX14			POTEA	POTEA		PRSS54	KLKBL4
		PRAMEF11	CTNNA2			POTEB	POTEB		PRSS55	T-SP1
		PRM1	FAM133A			POTEC	POTEC		PTPN20	PTPN20
		PRM2	LOC130576			POTED	POTED		RBM46	RBM46
		PRSS54	ANKRD45			POTEE	POTEE		REC114	C15orf60
		PTPN20A	ELOVL4			POTEG	POTEG		RGS22	RGS22
		RBM46	IGSF11			POTEH	POTEH		RHOXF2	RHOXF2
		RGS22	TMEFF1			PRAME	PRAME		RNF17	RNF17
		ROPN1	TMEFF2			PRAMEF1	PRAMEF1		ROPN1	ROPN1
		ROPN1B	ARX			PRAMEF11	PRAMEF11		ROPN1B	ROPN1B
		ROPN1L	SPEF2			PRM1	PRM1		ROPN1L	ROPN1L
		RQCD1	GPAT2			PRM2	PRM2		SAGE1	SAGE1
		SAGE1	TMEM108			PRSS54	PRSS54		SEMG1	SEMG1
		SEMG1	NOL4			PRSS55	PRSS55		SLCO6A1	SLCO6A1
		SLCO6A1	PTPN20A			PTPN20A	PTPN20		SPA17	SPA17
		SPA17	SPAG4			RBM46	RBM46		SPACA3	SPACA3
		SPACA3	MAEL			RGS22	RGS22		SPAG1	SPAG1
		SPAG1	RQCD1			ROPN1	ROPN1		SPAG17	SPAG17
		SPAG17	PRAME			ROPN1B	ROPN1B		SPAG4	SPAG4
		SPAG4	TEX101			ROPN1L	ROPN1L		SPAG6	SPAG6
		SPAG4L	SPATA19			RQCD1	CNOT9		SPAG8	SPAG8
		SPAG6	ODF1			SAGE1	SAGE1		SPAG9	SPAG9
		SPAG8	ODF2			SEMG1	SEMG1		SPANXA1	SPANXA1
		SPAG9	ODF3			SLCO6A1	SLCO6A1		SPANXA2	SPANXA2
		SPANXA1	ODF4			SPA17	SPA17		SPANXB1	SPANXB1
		SPANXA2	ATAD2			SPACA3	SPACA3		SPANXC	SPANXC
		SPANXB1	ZNF645			SPAG1	SPAG1		SPANXD	SPANXD
		SPANXB2	MCAK			SPAG17	SPAG17		SPANXN1	SPANXN1
		SPANXC	SPAG1			SPAG4	SPAG4		SPANXN2	SPANXN2
		SPANXD	SPAG6			SPAG4L	SUN5		SPANXN3	SPANXN3
		SPANXE	SPAG8			SPAG6	SPAG6		SPANXN4	SPANXN4
		SPANXN1	SPAG17			SPAG8	SPAG8		SPANXN5	SPANXN5
		SPANXN2	FBXO39			SPAG9	SPAG9		SPATA19	SPATA19
		SPANXN3	RGS22			SPANXA1	SPANXA1		SPEF2	SPEF2
		SPANXN4	cyclin A1			SPANXA2	SPANXA2		SPO11	SPO11
		SPANXN5	C15orf60			SPANXB1	SPANXB1		SSX1	SSX1
		SPATA19	CCDC83			SPANXB2	SPANXB1		SSX2	SSX2
		SPEF2	TEKT5			SPANXC	SPANXC		SSX2B	Not found on BeadChip
		SPINLW1	NR6A1			SPANXD	SPANXD		SSX4	SSX4
		SPO11	TMPRSS12			SPANXE	SPANXD		SSX4B	SSX4B
		SSX	TPPP2			SPANXN1	SPANXN1		SSX5	SSX5
		SSX1	PRSS55			SPANXN2	SPANXN2		SSX6	SSX6
		SSX2	DMRT1			SPANXN3	SPANXN3		SSX7	SSX7
		SSX2B	EDAG, NDR			SPANXN4	SPANXN4		SSX9	SSX9
		SSX3	DNAJB8			SPANXN5	SPANXN5		SUN5	SPAG4L
		SSX4	CSAG3B			SPATA19	SPATA19		SYCE1	SYCE1
		SSX4B	CTAG1A			SPEF2	SPEF2		SYCE1L	SYCE1L
		SSX5	GAGE12B			SPINLW1	EPPIN		SYCP1	SYCP1
		SSX6	GAGE12C			SPO11	SPO11		TAF7L	TAF7L
		SSX7	GAGE12D			SSX	SSX2		TDRD1	TDRD1
		SSX9	GAGE12E			SSX1	SSX1		TDRD6	TDRD6
		SYCE1	GAGE12F			SSX2	SSX2		TEKT5	TEKT5
		SYCE1L	GAGE12G			SSX2b	SSX2B		TEX101	TEX101
		SYCP1	GAGE12H			SSX3	SSX2B		TEX14	TEX14
		TAF7L	GAGE12I			SSX4	SSX4		TEX15	TEX15
		TAG	GAGE12J			SSX4B	SSX4B		TEX38	Not found on BeadChip
		TDRD1	GAGE13			SSX5	SSX5		TFDP3	TFDP3
		TDRD4	LOC728137			SSX6	SSX6		THEG	THEG
		TDRD6	MAGEA2B			SSX7	SSX7		TMEFF1	TMEFF1
		TEX101	MAGEA9B/LOC728269			SSX9	SSX9		TMEFF2	TMEFF2
		TEX14	NXF2B			SYCE1	SYCE1		TMEM108	TMEM108
		TEX15	SPANXA2			SYCE1L	SYCE1L		TMPRSS12	TMPRSS12
		TFDP3	SPANXB2			SYCP1	SYCP1		TPPP2	TPPP2
		THEG	SPANXE			TAF7L	TAF7L		TPTE	TPTE
		THEG4	SSX4B			TAG	LINC01194		TPTE2	TPTE2
		TMEFF1	SSX5			TDRD1	TDRD1		TSGA10	TSGA10
		TMEFF2	SSX6			TDRD4	RNF17		TSPY1	TSPY1
		TMEM108	SSX7			TDRD6	TDRD6		TSPY2	TSPY2
		TPTE	SSX9			TEKT5	TEKT5		TSPY3	TSPY3
		TPTE2	TSPY1D			TEX101	TEX101		TSSK6	TSSK6
		TSGA10	TSPY1E			TEX14	TEX14		TTK	TTK
		TSP50	TSPY1F			TEX15	TEX15		TULP2	TULP2
		TSPY1D	TSPY1G			TFDP3	TFDP3		VENTXP1	VENTXP1
		TSPY1E	TSPY1H			THEG	THEG		XAGE1B	XAGE1B
		TSPY1F	TSPY1I			THEG4	TEX38		XAGE1E	XAGE1E
		TSPY1G	TSPY2			TMEFF1	TMEFF1		XAGE2	XAGE2
		TSPY1H	XAGE1E			TMEFF2	TMEFF2		XAGE3	XAGE3
		TSPY1I				TMEM108	TMEM108		XAGE-4	XAGE-4	Gene type: pseudo
		TSPY2				TMPRSS12	TMPRSS12		XAGE5	XAGE5
		TSPY3				TPPP2	TPPP2		ZNF165	ZNF165
		TSSK6				TPTE	TPTE		ZNF645	ZNF645
		TTK				TPTE2	TPTE2
		TULP2				TSGA10	TSGA10
		VENTXP1				TSP50	PRSS50
		XAGE1A				TSPY1D	TSPY1
		XAGE1B				TSPY1E	TSPY1
		XAGE1C				TSPY1F	TSPY1
		XAGE1D				TSPY1G	TSPY1
		XAGE1E				TSPY1H	TSPY1
		XAGE2				TSPY1I	TSPY1
		XAGE2B				TSPY2	TSPY2
		XAGE2B/CTD-2267G17.3				TSPY3	TSPY3
		XAGE3				TSSK6	TSSK6
		XAGE-3b				TTK	TTK
		XAGE-4/RP11-167P23.2				TULP2	TULP2
		XAGE5				VENTXP1	VENTXP1
		ZNF165				XAGE1	XAGE1B
		ZNF645				XAGE1A	XAGE1B
						XAGE1B	XAGE1B
						XAGE1C	XAGE1E
						XAGE1D	XAGE1E
						XAGE1E	XAGE1E
						XAGE2	XAGE2
						XAGE2B	XAGE2
						XAGE2B/CTD-2267G17.3	XAGE2
						XAGE3	XAGE3
						XAGE-3b	Not found
						XAGE-4/RP11-167P23.2	XAGE-4
						XAGE5	XAGE5
						ZNF165	ZNF165
						ZNF645	ZNF645

## Sheet: CT Database
Cancer/Testis Antiges as listed in the CT Database (www.cta.lncc.br; accessed 18 October 2016)
Gene family	Family member	Chromosomal localization	CT identifier
MAGEA	MAGEA1	Xq28	CT1.1
MAGEA	MAGEA2	Xq28	CT1.2
MAGEA	MAGEA3	Xq28	CT1.3
MAGEA	MAGEA4	Xq28	CT1.4
MAGEA	MAGEA5	Xq28	CT1.5
MAGEA	MAGEA6	Xq28	CT1.6
MAGEA	MAGEA8	Xq28	CT1.8
MAGEA	MAGEA9	Xq28	CT1.9
MAGEA	MAGEA10	Xq28	CT1.10
MAGEA	MAGEA11	Xq28	CT1.11
MAGEA	MAGEA12	Xq28	CT1.12
BAGE	BAGE	21p11.1	CT2.1
BAGE	BAGE2	21p11.1	CT2.2
BAGE	BAGE3	21p11.1	CT2.3
BAGE	BAGE4	21p11.1	CT2.4
BAGE	BAGE5	21p11.1	CT2.5
MAGEB	MAGEB1	Xp21.3	CT3.1
MAGEB	MAGEB2	Xp21.3	CT3.2
MAGEB	MAGEB5	Xp21.3	CT3.3
MAGEB	MAGEB6	Xp21.3	CT3.4
MAGEB	MAGEB3	Xp21.3	CT3.5
MAGEB	MAGEB4	Xp21.3	CT3.6
GAGE	GAGE1	Xp11.4-p11.2	CT4.1
GAGE	GAGE2A	Xp11.23	CT4.2
GAGE	GAGE3	Xp11.23	CT4.3
GAGE	GAGE4	Xp11.4-p11.2	CT4.4
GAGE	GAGE5	Xp11.4-p11.2	CT4.5
GAGE	GAGE6	Xp11.4-p11.2	CT4.6
GAGE	GAGE7	Xp11.4-p11.2	CT4.7
GAGE	GAGE8	Xp11.23	CT4.8
SSX	SSX1	Xp11.23-p11.22	CT5.1
SSX	SSX2	Xp11.22	CT5.2a
SSX	SSX2b	Xp11.22	CT5.2b
SSX	SSX3	Xp11.23	CT5.3
SSX	SSX4	Xp11.23	CT5.4
NY-ESO-1	CTAG1B	Xq28	CT6.1
NY-ESO-1	LAGE-1b	Xq28	CT6.2b
NY-ESO-1	CTAG2	Xq28	CT6.2a
MAGEC1	MAGEC1	Xq26	CT7.1
MAGEC1	MAGEC3	Xq27.2	CT7.2
SYCP1	SYCP1	1p13-p12	CT8
BRDT	BRDT	1p22.1	CT9
MAGEC2	MAGEC2	Xq27	CT10
SPANX	SPANXA1	Xq27.1	CT11.1
SPANX	SPANXB1	Xq27.1	CT11.2
SPANX	SPANXC	Xq27.1	CT11.3
SPANX	SPANXD	Xq27.1	CT11.4
SPANX	SPANXN1	Xq27	CT11.6
SPANX	SPANXN2	Xq27.3	CT11.7
SPANX	SPANXN3	Xq27.3	CT11.8
SPANX	SPANXN4	Xq27.3	CT11.9
SPANX	SPANXN5	Xp11.22	CT11.10
XAGE	XAGE1D	Xp11.22	CT12.1d
XAGE	XAGE1C	Xp11.22	CT12.1c
XAGE	XAGE1B	Xp11.22	CT12.1b
XAGE	XAGE1	Xp11.22	CT12.1a
XAGE	XAGE2	Xp11.22	CT12.2
XAGE	XAGE3	Xp11.22-p11.21	CT12.3a
XAGE	XAGE-3b	Xp11.22	CT12.3b
XAGE	XAGE-4/RP11-167P23.2	Xp11.21	CT12.4
XAGE	XAGE5	Xp11.22	CT12.5
HAGE	DDX43	6q12-q13	CT13
SAGE	SAGE1	Xq26	CT14
ADAM2	ADAM2	8p11.2	CT15
PAGE-5	PAGE5	Xp11.21	CT16.1
PAGE-5	CT16.2	X911.21	CT16.2
PAGE-5	PAGE1	Xp11.23	CT16.3
PAGE-5	PAGE2	Xp11.21	CT16.4
PAGE-5	PAGE2B	Xp11.21	CT16.5
PAGE-5	PAGE3	Xp11.21	CT16.6
PAGE-5	PAGE4	Xp11.23	CT16.7
LIPI	LIPI	21q11.2	CT17
NA88A pseudogene	VENTXP1	Xp21.3	CT18
IL13RA	IL13RA2	Xq13.1-q28	CT19
TSP50	TSP50	3p14-p12	CT20
CTAGE-1	CTAGE1	18p11.2	CT21.1
CTAGE-1	CTAGE-2	18p11.2	CT21.2
CTAGE-1	CTAGE5	14q13.3	CT21.3
SPA17	SPA17	11q24.2	CT22
ACRBP	ACRBP	12p13.31	CT23
CSAGE	CSAG1	Xq28	CT24.1
CSAGE	CSAG2	Xq28	CT24.2
MMA1	DSCR8	21q22.2	CT25.1a
MMA1	MMA1b	21q22.2	CT25.1b
CAGE	DDX53	Xp22.11	CT26
BORIS	CTCFL	20q13.31	CT27
HOM-TES-85	LUZP4	Xq23	CT28
AF15q14	CASC5	15q14	CT29
HCA661	TFDP3	Xq26.2	CT30
JARID1B	JARID1B	1q32.1	CT31
LDHC	LDHC	11p15.5-p15.3	CT32
MORC	MORC1	3q13	CT33
SGY-1	DKKL1	19q13.33	CT34
SPO11	SPO11	20q13.2-q13.3	CT35
TPX1	CRISP2	6p21-qter	CT36
NY-SAR-35	FMR1NB	Xq27.3-q28	CT37
FTHL17	FTHL17	Xp21	CT38
NXF2	NXF2	Xq22.1	CT39
TAF7L	TAF7L	Xq22.1	CT40
TDRD1	TDRD1	10q25.3	CT41.1
TDRD1	TDRD6	6p12.3	CT41.2
TDRD	TDRD4	13q12.12	CT41.3
TEX15	TEX15	8p12	CT42
FATE	FATE1	Xq28	CT43
TPTE	TPTE	21p11	CT44
CT45	CT45A1	Xq26.3	CT45.1
CT45	CT45A2	Xq26.3	CT45.2
CT45	CT45A3	Xq26.3	CT45.3
CT45	CT45A4	Xq26.3	CT45.4
CT45	CT45A5	Xq26.3	CT45.5
CT45	CT45A6	Xq26.3	CT45.6
HORMAD1	HORMAD1	1q21.2	CT46
HORMAD	HORMAD2	22q12.2	CT46.2
CT47	CT47A1	Xq24	CT47.1
CT47	CT47A2	Xq24	CT47.2
CT47	CT47A3	Xq24	CT47.3
CT47	CT47A4	Xq24	CT47.4
CT47	CT47A5	Xq24	CT47.5
CT47	CT47A6	Xq24	CT47.6
CT47	CT47A7	Xq24	CT47.7
CT47	CT47A8	Xq24	CT47.8
CT47	CT47A9	Xq24	CT47.9
CT47	CT47A10	Xq24	CT47.10
CT47	CT47A11	Xq24	CT47.11
CT47	CT47B1	Xq24	CT47.13
SLCO6A1	SLCO6A1	5q21.1	CT48
TAG	TAG	5p15.2	CT49
LEMD1	LEMD1	1q32.1	CT50
HSPB9	HSPB9	17q21.2	CT51
CCDC110	CCDC110	4q35.1	CT52
ZNF165	ZNF165	6p21.3	CT53
SPACA3	SPACA3	17q11.2	CT54
CXorf48	CXorf48	Xq26.3	CT55
THEG	THEG	19pter-p13	CT56
ACTL8	ACTL8	1p36.2-p35	CT57
NLRP4	NLRP4	19q13.42	CT58
COX6B2	COX6B2	19q13.42	CT59
LOC348120	LOC348120	15q11.2	CT60
CCDC33	CCDC33	15q24.1	CT61
LOC196993	LOC196993	15q23	CT62
PASD1	PASD1	Xq28	CT63
LOC647107	LOC647107	3q26.1	CT64
TULP2	TULP2	19q13.1	CT65
CT66	CT66/AA884595	7q11.22	CT66
PRSS54	PRSS54	16q21	CT67
RBM46	RBM46	4q32.1	CT68
CT69	CT69/BC040308	6q23.2	CT69
CT70	CT70/BI818097	Unknown	CT70
SPINLW1	SPINLW1	20q12-q13.2	CT71
TSSK6	TSSK6	19p13.11	CT72
ADAM29	ADAM29	4q34	CT73
CCDC36	CCDC36	3p21.31	CT74
LOC440934	LOC440934	2q36.1	CT75
SYCE1	SYCE1	10q26.3	CT76
CPXCR1	CPXCR1	Xq21.3	CT77
TSPY1	TSPY3	Yp11.2	CT78
TSGA10	TSGA10	2q11.2	CT79
PIWIL	HIWI, MIWI, PIWI	12q24.33	CT80.1
PIWIL	PIWIL2	8p21.3	CT80.2
ARMC3	ARMC3	10p12.31	CT81
AKAP3	AKAP3	12p13.3	CT82
Cxorf61	Cxorf61	Xq23	CT83
PBK	PBK	8p21.2	CT84
C21orf99	C21orf99	21q11.2	CT85
OIP5	OIP5	15q15.1	CT86
CEP290	CEP290	12q21.32	CT87
CABYR	CABYR	18q11.2	CT88
SPAG9	SPAG9	17q21.33	CT89
MPHOSPH1	MPHOSPH1	10q23.31	CT90
ROPN1	ROPN1	3q21.1	CT91
PLAC1	PLAC1	Xq26	CT92
CALR3	CALR3	19p13.11	CT93
PRM	PRM1	16p13.2	CT94.1
PRM	PRM2	16p13.2	CT94.2
CAGE1	CAGE1	6p24.3	CT95
CT96	TTK	6q13-q21	CT96
LY6K	LY6K	8q24.3	CT97
IMP-3	IMP-3	7p11	CT98
AKAP4	AKAP4	Xp11.2	CT99
DPPA2	DPPA2	3q13.13	CT100
KIAA0100/MLAA-22	KIAA0100	17q11.2	CT 101
DCAF12	DCAF12	9p13.3	CT102
SEMG1	SEMG1	20q12-q13.2	CT103
POTE	POTED	21q11.2	CT104.1
POTE	POTEE	2q21.1	CT104.2
POTE	POTEA	8p11.1	CT104.3
POTE	POTEG	14q11.1	CT104.4
POTE	POTEB	15q11.2	CT104.5
POTE	POTEC	18p11.21	CT104.6
POTE	POTEH	22q11.1	CT104.7
GOLGAGL2 FA	GOLGAGL2 FA	15q11.2	CT105
NUF2/CDCA1	CDCA1	1q23.3	CT106
RHOXF2/PEPP2	PEPP2	Xq24	CT107
OTOA	OTOA	16p12.2	CT108
CCDC62	CCDC62	12q24.31	CT 109
GPATCH2	GPATCH2	1q41	CT 110
CEP55	CEP55	10q23.33	CT 111
FAM46D	FAM46D	Xq21.1	CT 112
TEX14	TEX14	17q22	CT 113
CTNNA2	CTNNA2	2p12-p11.1	CT 114
FAM133A	FAM133A	Xq21.32	CT 115
LYPD6B	LOC130576	2q23.1-q23.2	CT 116
ANKRD45	ANKRD45	1q25.1	CT 117
ELOVL4	ELOVL4	6q14	CT 118
IGSF11	IGSF11	3q13.32	CT 119
TMEFF	TMEFF1	9q31	CT 120.1
TMEFF	TMEFF2	2q32.3	CT 120.2
ARX	ARX	Xp21	CT 121
SPEF2	SPEF2	5p13.2	CT 122
GPAT2	GPAT2	2q11.1	CT 123
TMEM108	TMEM108	3q21	CT 124
NOL4	NOL4	18q12	CT 125
PTPN20A	PTPN20A	10q11.22	CT 126
SPAG4	SPAG4	20q11.21	CT 127
MAEL	MAEL	1q24.1	CT128
RQCD1	RQCD1	2q35	CT 129
PRAME	PRAME	22q11.22	CT130
TEX101	TEX101	19q13.31	CT131
SPATA19	SPATA19	11q25	CT132
ODF1	ODF1	8q22.3	CT133
ODF2	ODF2	9q34.11	CT134
ODF3	ODF3	11p15.5	CT135
ODF4	ODF4	17p13.1	CT136
ATAD2	ATAD2	8q24.13	CT137
ZNF645	ZNF645	Xp22.11	CT138
KIF2C	MCAK	1p34.1	CT139
SPAG1	SPAG1	8q22.2	CT140
SPAG6	SPAG6	10p12.2	CT141
SPAG8	SPAG8	9p13.3	CT142
SPAG17	SPAG17	1p12	CT143
FBXO39	FBXO39	17p13.1	CT144
RGS22	RGS22	8q22.2	CT145
cylin A	cyclin A1	13q12.3-q13	CT146
KP-OVA52	C15orf60	15q22	CT147
CCDC83	CCDC83	11q14.1-q14.2	CT148
TEKT	TEKT5	16p13.13	CT149
NR6A1	NR6A1	9q33.3	CT150
TMPRSS12	TMPRSS12	12q13.12	CT151
TPPP2	TPPP2	14q11.2	CT152
PRSS55	PRSS55	8p23.1	CT153
DMRT1	DMRT1	9p24.3	CT154
HEMGN	EDAG, NDR	9q22.33	CT155
DNAJB8	DNAJB8	3q21.3	CT156
CSAGE	CSAG3B	Xq28
NY-ESO-1	CTAG1A	Xq28
GAGE	GAGE12B	Xp11.23
GAGE	GAGE12C	Xp11.23
GAGE	GAGE12D	Xp11.23
GAGE	GAGE12E	Xp11.23
GAGE	GAGE12F	Xp11.23
GAGE	GAGE12G	Xp11.23
GAGE	GAGE12H	Xp11.23
GAGE	GAGE12I	Xp11.4-p11.2
GAGE	GAGE12J	Xp11.23
GAGE	GAGE13	Xp11.23
TSPY1	LOC728137	Yp11.2
MAGEA	MAGEA2B	Xq28
MAGEA	MAGEA9B/LOC728269	Xq28
NXF2	NXF2B	Xq22.1
SPANX	SPANXA2	Xq27.1
SPANX	SPANXB2	Xq27.1
SPANX	SPANXE	Xq27.2
SSX	SSX4B	Xp11.23
SSX	SSX5	Xp11.23
SSX	SSX6	Xp11.2
SSX	SSX7	Xp11.23
SSX	SSX9	Xp11.23
TSPY1	TSPY1D	Yp11.2
TSPY1	TSPY1E	Yp11.2
TSPY1	TSPY1F	Yp11.2
TSPY1	TSPY1G	Yp11.2
TSPY1	TSPY1H	Yp11.2
TSPY1	TSPY1I	Yp11.2
TSPY1	TSPY2	Yp11.2
XAGE	XAGE1E	Xp11.22

## Sheet: HumanHT12 v4 BeadChip
PROBE_ID	GENE SYMBOL (NCBI)	GENE SYMBOL (ILMN)	GENE SYMBOLS IDENTICAL?	SEARCH_KEY	ILMN_GENE	CHROMOSOME	DEFINITION	SYNONYMS	TargetID	ProbeID	SPECIES	SOURCE	TRANSCRIPT	SOURCE_REFERENCE_ID	REFSEQ_ID	UNIGENE_ID	ENTREZ_GENE_ID	GI	ACCESSION	PROTEIN_PRODUCT	ARRAY_ADDRESS_ID	PROBE_TYPE	PROBE_START	PROBE_SEQUENCE	PROBE_CHR_ORIENTATION	PROBE_COORDINATES	CYTOBAND	ONTOLOGY_COMPONENT	ONTOLOGY_PROCESS	ONTOLOGY_FUNCTION	OBSOLETE_PROBE_ID
ILMN_1784203	ACRBP	ACRBP	NO	NM_032489.2	ACRBP	12	Homo sapiens acrosin binding protein (ACRBP), mRNA.	OY-TES-1; SP32	ACRBP	7510253	Homo sapiens	RefSeq	ILMN_22648	NM_032489.2	NM_032489.2		84519	17999523	NM_032489.2	NP_115878.2	7510253	S	1594	AGTGCGCTGAGCCCTGGCAAAAGTGAGGACGTTGTGCTTCGATGGAGCCA	-	6747484-6747533	12p13.31d	A structure in the head of a spermatozoon that contains acid hydrolases, and is concerned with the breakdown of the outer membrane of the ovum during fertilization. It lies just beneath the plasma membrane and is derived from the lysosome [goid 1669] [evidence IEA]; The space external to the outermost structure of a cell. For cells without external protective or external encapsulating structures …	Any process specifically pertinent to the functioning of integrated living units: cells, tissues, organs, and organisms. A process is a collection of molecular events with a defined beginning and end [goid 8150] [evidence ND ]	Elemental activities, such as catalysis or binding, describing the actions of a gene product at the molecular level. A given gene product may exhibit one or more molecular functions [goid 3674] [evidence ND ]	OY-TES-1; SP32
ILMN_1704078	ACTL8	ACTL8	NO	NM_030812.1	ACTL8	1	Homo sapiens actin-like 8 (ACTL8), mRNA.		ACTL8	1450100	Homo sapiens	RefSeq	ILMN_23903	NM_030812.1	NM_030812.1		81569	32698756	NM_030812.1	NP_110439.1	1450100	S	1502	GCAGGGGACAGTTTTTCCAGGGTGGCCTATCATTGGGGTATGAGTGGCTG	+	18025822-18025871	1p36.13d	All of the contents of a cell excluding the plasma membrane and nucleus, but including other subcellular structures [goid 5737] [evidence IEA]; Any of the various filamentous elements that form the internal framework of cells, and typically remain after treatment of the cells with mild detergent to remove membrane constituents and soluble components of the cytoplasm. The term embraces intermediat…		The action of a molecule that contributes to the structural integrity of a complex or assembly within or outside a cell [goid 5198] [evidence IEA]; Interacting selectively with any protein or protein complex (a complex of two or more proteins that may include other nonprotein molecules) [goid 5515] [evidence IEA]; Interacting selectively with any protein or protein complex (a complex of two or mo…
ILMN_1662675	ADAM2	ADAM2	NO	NM_001464.3	ADAM2	8	Homo sapiens ADAM metallopeptidase domain 2 (ADAM2), mRNA.	PH30; CRYN1; FTNB; CRYN2; PH-30b	ADAM2	6110315	Homo sapiens	RefSeq	ILMN_18772	NM_001464.3	NM_001464.3		2515	55743079	NM_001464.3	NP_001455.3	6110315	S	2530	ACGCTATTTCTGTTGGTTAGTAGACACTAATTCTGTCAGTAGGGGCATGG	-	39720474-39720523	8p11.22a	Penetrating at least one phospholipid bilayer of a plasma membrane. May also refer to the state of being buried in the bilayer with no exposure outside the bilayer [goid 5887] [pmid 9041139] [evidence TAS]; Double layer of lipid molecules that encloses all cells, and, in eukaryotes, many organelles; may be a single or double lipid bilayer; also includes associated proteins [goid 16020] [evidence …	The hydrolysis of a peptide bond or bonds within a protein [goid 6508] [evidence IEA]; The attachment of a cell, either to another cell or to an underlying substrate such as the extracellular matrix, via cell adhesion molecules [goid 7155] [evidence IEA]; The binding and fusion of a sperm, having penetrated the zona pellucida, with the plasma membrane of the oocyte. Binding occurs at the posterio…	Catalysis of the hydrolysis of internal, alpha-peptide bonds in a polypeptide chain by a mechanism in which water acts as a nucleophile, one or two metal ions hold the water molecule in place, and charged amino acid side chains are ligands for the metal ions [goid 4222] [evidence IEA]; Interacting selectively with an integrin [goid 5178] [pmid 9041139] [evidence TAS]; Interacting selectively with…	PH30; CRYN1; FTNB; CRYN2; PH-30b
ILMN_1737629	ADAM20	ADAM20	NO	NM_003814.4	ADAM20	14	Homo sapiens ADAM metallopeptidase domain 20 (ADAM20), mRNA.		ADAM20	2320270	Homo sapiens	RefSeq	ILMN_17428	NM_003814.4	NM_003814.4		8748	50845381	NM_003814.4	NP_003805.3	2320270	S	2348	CTGTCACTGCAACCATGAATGGGCACCCCCATACTGCAAGGACAAAGGCT	-	70989472-70989521	14q24.2a	Double layer of lipid molecules that encloses all cells, and, in eukaryotes, many organelles; may be a single or double lipid bilayer; also includes associated proteins [goid 16020] [evidence IEA]; Penetrating at least one phospholipid bilayer of a membrane. May also refer to the state of being buried in the bilayer with no exposure outside the bilayer. When used to describe a protein, indicates …	The hydrolysis of a peptide bond or bonds within a protein [goid 6508] [evidence IEA]; The union of male and female gametes to form a zygote [goid 7338] [pmid 9469942] [evidence TAS]	Catalysis of the hydrolysis of internal, alpha-peptide bonds in a polypeptide chain by a mechanism in which water acts as a nucleophile, one or two metal ions hold the water molecule in place, and charged amino acid side chains are ligands for the metal ions [goid 4222] [evidence IEA]; Catalysis of the hydrolysis of a peptide bond. A peptide bond is a covalent bond formed when the carbon atom fro…
ILMN_1812112	ADAM21	ADAM21	NO	NM_003813.2	ADAM21	14	Homo sapiens ADAM metallopeptidase domain 21 (ADAM21), mRNA.	ADAM31; MGC125389	ADAM21	2690368	Homo sapiens	RefSeq	ILMN_29533	NM_003813.2	NM_003813.2		8747	15812182	NM_003813.2	NP_003804.1	2690368	S	1996	GGCTATGGGGGCAGTATTGACAGTGGCCCAGCATCTGCAAAGAGAGGAGT	+	69995965-69996014	14q24.2a	Double layer of lipid molecules that encloses all cells, and, in eukaryotes, many organelles; may be a single or double lipid bilayer; also includes associated proteins [goid 16020] [evidence IEA]; Penetrating at least one phospholipid bilayer of a membrane. May also refer to the state of being buried in the bilayer with no exposure outside the bilayer. When used to describe a protein, indicates …	The hydrolysis of a peptide bond or bonds within a protein [goid 6508] [evidence IEA]; The union of male and female gametes to form a zygote [goid 7338] [pmid 9469942] [evidence TAS]	Catalysis of the hydrolysis of internal, alpha-peptide bonds in a polypeptide chain by a mechanism in which water acts as a nucleophile, one or two metal ions hold the water molecule in place, and charged amino acid side chains are ligands for the metal ions [goid 4222] [evidence IEA]; Catalysis of the hydrolysis of a peptide bond. A peptide bond is a covalent bond formed when the carbon atom fro…	ADAM31; MGC125389
ILMN_1675210	ADAM22	ADAM22	NO	NM_004194.2	ADAM22	7	Homo sapiens ADAM metallopeptidase domain 22 (ADAM22), transcript variant 1, mRNA.	MDC2; MGC149832	ADAM22	1470039	Homo sapiens	RefSeq	ILMN_15977	NM_021723.2	NM_021723.2		53616	21536387	NM_021723.2	NP_068369.1	1470039	A	2551	CTGTGAAAATGGGCGACCTCGAAGTAACTCTTGGCAAGGTAACCTGGGAG	+	87630425-87630431:87633083-87633125	7q21.12b	Double layer of lipid molecules that encloses all cells, and, in eukaryotes, many organelles; may be a single or double lipid bilayer; also includes associated proteins [goid 16020] [evidence IEA]; Penetrating at least one phospholipid bilayer of a membrane. May also refer to the state of being buried in the bilayer with no exposure outside the bilayer. When used to describe a protein, indicates …	The hydrolysis of a peptide bond or bonds within a protein [goid 6508] [evidence IEA]; Any process that stops, prevents or reduces the frequency, rate or extent of cell adhesion [goid 7162] [pmid 9693107] [evidence NAS]; The process whose specific outcome is the progression of the central nervous system over time, from its formation to the mature structure. The central nervous system is the core …	Catalysis of the hydrolysis of internal, alpha-peptide bonds in a polypeptide chain by a mechanism in which water acts as a nucleophile, one or two metal ions hold the water molecule in place, and charged amino acid side chains are ligands for the metal ions [goid 4222] [evidence IEA]; Interacting selectively with an integrin [goid 5178] [pmid 9693107] [evidence NAS]; Interacting selectively with…	MGC149832; MDC2
ILMN_1706302	ADAM22	ADAM22	NO	NM_021722.2	ADAM22	7	Homo sapiens ADAM metallopeptidase domain 22 (ADAM22), transcript variant 2, mRNA.	MGC149832; MDC2	ADAM22	2490255	Homo sapiens	RefSeq	ILMN_9062	NM_021722.2	NM_021722.2		53616	21536385	NM_021722.2	NP_068368.2	2490255	I	2556	ACCCATGGTTCAAAAGAGACTATAATGTAGCTAAGTGGGTAGAAGATGTG	+	87630430-87630431:87633083-87633130	7q21.12b	Double layer of lipid molecules that encloses all cells, and, in eukaryotes, many organelles; may be a single or double lipid bilayer; also includes associated proteins [goid 16020] [evidence IEA]; Penetrating at least one phospholipid bilayer of a membrane. May also refer to the state of being buried in the bilayer with no exposure outside the bilayer. When used to describe a protein, indicates …	The hydrolysis of a peptide bond or bonds within a protein [goid 6508] [evidence IEA]; Any process that stops, prevents or reduces the frequency, rate or extent of cell adhesion [goid 7162] [pmid 9693107] [evidence NAS]; The process whose specific outcome is the progression of the central nervous system over time, from its formation to the mature structure. The central nervous system is the core …	Catalysis of the hydrolysis of internal, alpha-peptide bonds in a polypeptide chain by a mechanism in which water acts as a nucleophile, one or two metal ions hold the water molecule in place, and charged amino acid side chains are ligands for the metal ions [goid 4222] [evidence IEA]; Interacting selectively with an integrin [goid 5178] [pmid 9693107] [evidence NAS]; Interacting selectively with…	MGC149832; MDC2
ILMN_2351754	ADAM22	ADAM22	NO	NM_021721.2	ADAM22	7	Homo sapiens ADAM metallopeptidase domain 22 (ADAM22), transcript variant 5, mRNA.	MDC2; MGC149832	ADAM22	7400600	Homo sapiens	RefSeq	ILMN_8239	NM_021721.2	NM_021721.2		53616	21536384	NM_021721.2	NP_068367.1	7400600	A	1808	GGGACGGAGAAGGGTAACTGTGGGAAAGACAAAGACACATGGATACAGTG	+	87612382-87612431	7q21.12b	Double layer of lipid molecules that encloses all cells, and, in eukaryotes, many organelles; may be a single or double lipid bilayer; also includes associated proteins [goid 16020] [evidence IEA]; Penetrating at least one phospholipid bilayer of a membrane. May also refer to the state of being buried in the bilayer with no exposure outside the bilayer. When used to describe a protein, indicates …	The hydrolysis of a peptide bond or bonds within a protein [goid 6508] [evidence IEA]; Any process that stops, prevents or reduces the frequency, rate or extent of cell adhesion [goid 7162] [pmid 9693107] [evidence NAS]; The process whose specific outcome is the progression of the central nervous system over time, from its formation to the mature structure. The central nervous system is the core …	Catalysis of the hydrolysis of internal, alpha-peptide bonds in a polypeptide chain by a mechanism in which water acts as a nucleophile, one or two metal ions hold the water molecule in place, and charged amino acid side chains are ligands for the metal ions [goid 4222] [evidence IEA]; Interacting selectively with an integrin [goid 5178] [pmid 9693107] [evidence NAS]; Interacting selectively with…	MGC149832; MDC2
ILMN_2060086	ADAM23	ADAM23	NO	NM_003812.2	ADAM23	2	Homo sapiens ADAM metallopeptidase domain 23 (ADAM23), mRNA.	MDC3	ADAM23	110731	Homo sapiens	RefSeq	ILMN_30039	NM_003812.2	NM_003812.2		8745	73765550	NM_003812.2	NP_003803.1	110731	S	2726	AGCTGCGCTGGATGGACACCGCCTTGCACTGTTGGATTCTGGGTATGACA	+	207190600-207190649	2q33.3b	The space external to the outermost structure of a cell. For cells without external protective or external encapsulating structures this refers to space outside of the plasma membrane. This term covers the host cell environment outside an intracellular parasite [goid 5576] [evidence IEA]; The membrane surrounding a cell that separates the cell from its external environment. It consists of a phosp…	The hydrolysis of a peptide bond or bonds within a protein [goid 6508] [evidence IEA]; The attachment of a cell, either to another cell or to an underlying substrate such as the extracellular matrix, via cell adhesion molecules [goid 7155] [evidence IEA]; The process whose specific outcome is the progression of the central nervous system over time, from its formation to the mature structure. The …	Catalysis of the hydrolysis of internal, alpha-peptide bonds in a polypeptide chain by a mechanism in which water acts as a nucleophile, one or two metal ions hold the water molecule in place, and charged amino acid side chains are ligands for the metal ions [goid 4222] [evidence IEA]; Interacting selectively with an integrin [goid 5178] [pmid 9693107] [evidence TAS]; Interacting selectively with…	MDC3
ILMN_1664236	ADAM28	ADAM28	NO	NM_021777.2	ADAM28	8	Homo sapiens ADAM metallopeptidase domain 28 (ADAM28), transcript variant 3, mRNA.	MDC-Ls; MDC-Lm; MDCL; eMDCII; ADAM23	ADAM28	290451	Homo sapiens	RefSeq	ILMN_4121	NM_021777.3	NM_021777.3		10863	98985829	NM_021777.3	NP_068547.2	290451	I	1708	AGTGTTTAACCATGGTCAAAGGACCATTCTGTCCTATCCTTCTTAGAAGC	+	24193212-24193261	8p21.2d	The space external to the outermost structure of a cell. For cells without external protective or external encapsulating structures this refers to space outside of the plasma membrane. This term covers the host cell environment outside an intracellular parasite [goid 5576] [evidence IEA]; The membrane surrounding a cell that separates the cell from its external environment. It consists of a phosp…	The hydrolysis of a peptide bond or bonds within a protein [goid 6508] [evidence IEA]; The process of formation of spermatozoa, including spermatocytogenesis and spermiogenesis [goid 7283] [pmid 10587367] [evidence TAS]	Catalysis of the hydrolysis of internal, alpha-peptide bonds in a polypeptide chain by a mechanism in which water acts as a nucleophile, one or two metal ions hold the water molecule in place, and charged amino acid side chains are ligands for the metal ions [goid 4222] [evidence IEA]; Catalysis of the hydrolysis of a peptide bond. A peptide bond is a covalent bond formed when the carbon atom fro…	MDC-Ls; MDC-Lm; MDCL; eMDCII; ADAM23
ILMN_1664631	ADAM28	ADAM28	NO	NM_021777.2	ADAM28	8	Homo sapiens ADAM metallopeptidase domain 28 (ADAM28), transcript variant 3, mRNA.	MDC-Ls; MDC-Lm; MDCL; eMDCII; ADAM23	ADAM28	6180491	Homo sapiens	RefSeq	ILMN_4121	NM_021777.3	NM_021777.3		10863	98985829	NM_021777.3	NP_068547.2	6180491	A	1593	TGCTTGATGGGGACATGCCCCACACTGCAGGAGCAGTGCACAGAGCTGTG	+	24193097-24193146	8p21.2d	The space external to the outermost structure of a cell. For cells without external protective or external encapsulating structures this refers to space outside of the plasma membrane. This term covers the host cell environment outside an intracellular parasite [goid 5576] [evidence IEA]; The membrane surrounding a cell that separates the cell from its external environment. It consists of a phosp…	The hydrolysis of a peptide bond or bonds within a protein [goid 6508] [evidence IEA]; The process of formation of spermatozoa, including spermatocytogenesis and spermiogenesis [goid 7283] [pmid 10587367] [evidence TAS]	Catalysis of the hydrolysis of internal, alpha-peptide bonds in a polypeptide chain by a mechanism in which water acts as a nucleophile, one or two metal ions hold the water molecule in place, and charged amino acid side chains are ligands for the metal ions [goid 4222] [evidence IEA]; Catalysis of the hydrolysis of a peptide bond. A peptide bond is a covalent bond formed when the carbon atom fro…	MDC-Ls; MDC-Lm; MDCL; eMDCII; ADAM23
ILMN_1802100	ADAM28	ADAM28	NO	NM_014265.3	ADAM28	8	Homo sapiens ADAM metallopeptidase domain 28 (ADAM28), transcript variant 1, mRNA.	eMDCII; MDC-Ls; ADAM23; MDC-Lm; MDCL	ADAM28	7330333	Homo sapiens	RefSeq	ILMN_164717	NM_014265.4	NM_014265.4		10863	98985827	NM_014265.4	NP_055080.2	7330333	I	2199	GGCACCAGGCCACACAAACAGAAGAGGAAACCCCAGATGGTAAAGGCTGT	+	24207541-24207590	8p21.2d	The space external to the outermost structure of a cell. For cells without external protective or external encapsulating structures this refers to space outside of the plasma membrane. This term covers the host cell environment outside an intracellular parasite [goid 5576] [evidence IEA]; The membrane surrounding a cell that separates the cell from its external environment. It consists of a phosp…	The hydrolysis of a peptide bond or bonds within a protein [goid 6508] [evidence IEA]; The process of formation of spermatozoa, including spermatocytogenesis and spermiogenesis [goid 7283] [pmid 10587367] [evidence TAS]	Catalysis of the hydrolysis of internal, alpha-peptide bonds in a polypeptide chain by a mechanism in which water acts as a nucleophile, one or two metal ions hold the water molecule in place, and charged amino acid side chains are ligands for the metal ions [goid 4222] [evidence IEA]; Catalysis of the hydrolysis of a peptide bond. A peptide bond is a covalent bond formed when the carbon atom fro…	MDC-Ls; MDC-Lm; MDCL; eMDCII; ADAM23
ILMN_2194158	ADAM29	ADAM29	NO	NM_014269.3	ADAM29	4	Homo sapiens ADAM metallopeptidase domain 29 (ADAM29), mRNA.	svph1	ADAM29	1770672	Homo sapiens	RefSeq	ILMN_175574	NM_014269.3	NM_014269.3		11086	73765551	NM_014269.3	NP_055084.3	1770672	S	3000	CCCAGAGTCAACCTCCTGTGACACCCTCCCAGAGGCAACCTCAGTTGATG	+	176135631-176135680	4q34.1d	Penetrating at least one phospholipid bilayer of a plasma membrane. May also refer to the state of being buried in the bilayer with no exposure outside the bilayer [goid 5887] [pmid 10512762] [evidence TAS]; Double layer of lipid molecules that encloses all cells, and, in eukaryotes, many organelles; may be a single or double lipid bilayer; also includes associated proteins [goid 16020] [evidence…	The hydrolysis of a peptide bond or bonds within a protein [goid 6508] [evidence IEA]; The process of formation of spermatozoa, including spermatocytogenesis and spermiogenesis [goid 7283] [pmid 10512762] [evidence TAS]	Catalysis of the hydrolysis of internal, alpha-peptide bonds in a polypeptide chain by a mechanism in which water acts as a nucleophile, one or two metal ions hold the water molecule in place, and charged amino acid side chains are ligands for the metal ions [goid 4222] [evidence IEA]; Interacting selectively with zinc (Zn) ions [goid 8270] [evidence IEA]	svph1
ILMN_1808905	AKAP3	AKAP3	NO	NM_006422.2	AKAP3	12	Homo sapiens A kinase (PRKA) anchor protein 3 (AKAP3), mRNA.	AKAP110; FSP95; SOB1; PRKA3	AKAP3	4860088	Homo sapiens	RefSeq	ILMN_182454	NM_006422.2	NM_006422.2		10566	21493040	NM_006422.2	NP_006413.2	4860088	S	2703	TGCGCTATGAGAAGGAGCGCCAGCTGAATGAGGCGGTGGGGAATGTCACA	-	4724943-4724992	12p13.32a	A structure in the head of a spermatozoon that contains acid hydrolases, and is concerned with the breakdown of the outer membrane of the ovum during fertilization. It lies just beneath the plasma membrane and is derived from the lysosome [goid 1669] [evidence IEA]; A long, whiplike protrusion from the surface of a eukaryotic cell, whose undulations drive the cell through a liquid medium; similar…	Any process involved in the controlled movement of a cell [goid 6928] [pmid 10319321] [evidence TAS]; The series of molecular signals generated as a consequence of a transmembrane receptor serine/threonine kinase binding to its physiological ligand [goid 7178] [evidence IEA]; The discharge, by sperm, of a single, anterior secretory granule following their attachment to the zona pellucida surround…	Interacting selectively with any subunit of protein kinase A [goid 51018] [pmid 10319321] [evidence TAS]	AKAP110; FSP95; SOB1; PRKA3
ILMN_1734794	AKAP4	AKAP4	NO	NM_139289.1	AKAP4	X	Homo sapiens A kinase (PRKA) anchor protein 4 (AKAP4), transcript variant 2, mRNA.	FSC1; HI; p82; hAKAP82; AKAP82	AKAP4	7100575	Homo sapiens	RefSeq	ILMN_10770	NM_139289.1	NM_139289.1		8852	21493038	NM_139289.1	NP_647450.1	7100575	A	2510	CCTCAGGTTTCAGCTAAAGCAGCAGAGAAGGGGTACAGTGTAGGAGGTCT	-	49955705-49955754	Xp11.22c	Any of the various filamentous elements that form the internal framework of cells, and typically remain after treatment of the cells with mild detergent to remove membrane constituents and soluble components of the cytoplasm. The term embraces intermediate filaments, microfilaments, microtubules, the microtrabecular lattice, and other structures characterized by a polymeric filamentous nature and…	The cascade of processes by which a signal interacts with a receptor, causing a change in the level or activity of a second messenger or other downstream target, and ultimately effecting a change in the functioning of the cell [goid 7165] [pmid 9822690] [evidence TAS]; The union of male and female gametes to form a zygote [goid 7338] [pmid 9822690] [evidence TAS]; A process that is carried out at…	The action of a molecule that contributes to the structural integrity of a complex or assembly within or outside a cell [goid 5198] [evidence IEA]; Interacting selectively with any subunit of protein kinase A [goid 51018] [evidence ISS]	FSC1; HI; p82; hAKAP82; AKAP82
ILMN_2253207	AKAP4	AKAP4	NO	NM_139289.1	AKAP4	X	Homo sapiens A kinase (PRKA) anchor protein 4 (AKAP4), transcript variant 2, mRNA.	FSC1; HI; p82; hAKAP82; AKAP82	AKAP4	5560450	Homo sapiens	RefSeq	ILMN_10770	NM_139289.1	NM_139289.1		8852	21493038	NM_139289.1	NP_647450.1	5560450	I	38	GCACTTCTCAGTTCCATCTAAAGGGGCACATCTCCCTTCTGGGTGTCACG	-	49964917-49964966	Xp11.22c	Any of the various filamentous elements that form the internal framework of cells, and typically remain after treatment of the cells with mild detergent to remove membrane constituents and soluble components of the cytoplasm. The term embraces intermediate filaments, microfilaments, microtubules, the microtrabecular lattice, and other structures characterized by a polymeric filamentous nature and…	The cascade of processes by which a signal interacts with a receptor, causing a change in the level or activity of a second messenger or other downstream target, and ultimately effecting a change in the functioning of the cell [goid 7165] [pmid 9822690] [evidence TAS]; The union of male and female gametes to form a zygote [goid 7338] [pmid 9822690] [evidence TAS]; A process that is carried out at…	The action of a molecule that contributes to the structural integrity of a complex or assembly within or outside a cell [goid 5198] [evidence IEA]; Interacting selectively with any subunit of protein kinase A [goid 51018] [evidence ISS]	FSC1; HI; p82; hAKAP82; AKAP82
ILMN_2268556	AKAP4	AKAP4	NO	NM_003886.2	AKAP4	X	Homo sapiens A kinase (PRKA) anchor protein 4 (AKAP4), transcript variant 1, mRNA.	FSC1; HI; p82; hAKAP82; AKAP82	AKAP4	510008	Homo sapiens	RefSeq	ILMN_23661	NM_003886.2	NM_003886.2		8852	21493036	NM_003886.2	NP_003877.2	510008	I	4	GCTGGCAGTCAAGGCTGTAGGAGGGCATGGAGAGTTGAAGAAAAAAGCAG	-	49965611-49965660	Xp11.22c	Any of the various filamentous elements that form the internal framework of cells, and typically remain after treatment of the cells with mild detergent to remove membrane constituents and soluble components of the cytoplasm. The term embraces intermediate filaments, microfilaments, microtubules, the microtrabecular lattice, and other structures characterized by a polymeric filamentous nature and…	The cascade of processes by which a signal interacts with a receptor, causing a change in the level or activity of a second messenger or other downstream target, and ultimately effecting a change in the functioning of the cell [goid 7165] [pmid 9822690] [evidence TAS]; The union of male and female gametes to form a zygote [goid 7338] [pmid 9822690] [evidence TAS]; A process that is carried out at…	The action of a molecule that contributes to the structural integrity of a complex or assembly within or outside a cell [goid 5198] [evidence IEA]; Interacting selectively with any subunit of protein kinase A [goid 51018] [evidence ISS]	FSC1; HI; p82; hAKAP82; AKAP82
ILMN_3235840	ANKRD30BP2	C21orf99	YES	XR_040882.1	C21ORF99	21	PREDICTED: Homo sapiens misc_RNA (C21orf99), miscRNA.		C21ORF99	5260259	Homo sapiens	RefSeq	ILMN_335157	XR_040882.1	XR_040882.1		149992	169215300	XR_040882.1		5260259	S	529	TGGCCATAAGGAAAAGAAGTGAGCAAATTGTGGAATTTTTACTGACAAAA	+	13339377-13339426	21q11.2a
ILMN_1733716	ANKRD45	ANKRD45	NO	NM_198493.1	ANKRD45	1	Homo sapiens ankyrin repeat domain 45 (ANKRD45), mRNA.	MGC161633; MGC161631; RP3-436N22.4; FLJ45235	ANKRD45	5560224	Homo sapiens	RefSeq	ILMN_20995	NM_198493.1	NM_198493.1		339416	38348297	NM_198493.1	NP_940895.1	5560224	S	2317	CTGTAACCTGTAACTCCTGCACTCAAGTGATCCTCCCACCATGCTTGGGT	-	171844402-171844451	1q25.1a			Interacting selectively with a nucleotide, any compound consisting of a nucleoside that is esterified with (ortho)phosphate or an oligophosphate at any hydroxyl group on the ribose or deoxyribose moiety [goid 166] [evidence IEA]; Interacting selectively with ATP, adenosine 5'-triphosphate, a universally important coenzyme and enzyme regulator [goid 5524] [evidence IEA]	MGC161633; MGC161631; RP3-436N22.4; FLJ45235
ILMN_3243057	ARMC3	ARMC3	NO	NM_173081.3	ARMC3	10	Homo sapiens armadillo repeat containing 3 (ARMC3), mRNA.		ARMC3	1850242	Homo sapiens	RefSeq	ILMN_365392	NM_173081.3	NM_173081.3		219681	189409123	NM_173081.3	NP_775104.2	1850242	S	2506	GAATTGGCATTGGTTGCTCCCTAGTTCGCGGAGAGTACGGTAGAGCGTGG	+	23326212-23326261	10p12.2a			The selective, often stoichiometric, interaction of a molecule with one or more specific sites on another molecule [goid 5488] [evidence IEA]
ILMN_1724162	ARX	ARX	NO	NM_139058.1	ARX	X	Homo sapiens aristaless related homeobox (ARX), mRNA.	MRX43; MRX29; MRX32; MRXS1; ISSX; MRX38; PRTS; MRX54; MRX36; MRX33	ARX	4070020	Homo sapiens	RefSeq	ILMN_162588	NM_139058.1	NM_139058.1		170302	24497588	NM_139058.1	NP_620689.1	4070020	S	1903	CTGCCCCTGCTACTGCCAACCTCGCTCCAACTCCAACATCCACTCTCTCT	-	24932444-24932493	Xp21.3d	A membrane-bounded organelle of eukaryotic cells in which chromosomes are housed and replicated. In most cells, the nucleus contains all of the cell's chromosomes except the organellar chromosomes, and is the site of RNA synthesis and processing. In some species, or in specialized cell types, RNA metabolism or DNA replication may be absent [goid 5634] [evidence IEA]	The characteristic movement of immature neurons from germinal zones to specific positions where they will reside as they mature [goid 1764] [evidence IEA]; Any process that modulates the frequency, rate or extent of DNA-dependent transcription [goid 6355] [evidence IEA]; The biological process whose specific outcome is the progression of a multicellular organism over time from an initial conditio…	The function of binding to a specific DNA sequence in order to modulate transcription. The transcription factor may or may not also interact selectively with a protein or macromolecular complex [goid 3700] [evidence IEA]; Interacting selectively with DNA of a specific nucleotide composition, e.g. GC-rich DNA binding, or with a specific sequence motif or type of DNA e.g. promotor binding or rDNA b…	MRX43; MRX29; MRX32; MRXS1; ISSX; MRX38; PRTS; MRX54; MRX36; MRX33
ILMN_2048700	ATAD2	ATAD2	NO	NM_014109.2	ATAD2	8	Homo sapiens ATPase family, AAA domain containing 2 (ATAD2), mRNA.	MGC5254; MGC142216; DKFZp667N1320; MGC29843; PRO2000; MGC131938	ATAD2	1410242	Homo sapiens	RefSeq	ILMN_172027	NM_014109.2	NM_014109.2		29028	24497617	NM_014109.2	NP_054828.2	1410242	S	4032	GGCTTTGGCAATTCTTTCTCAGCCTACACCCTCACTTGTTGTGGATCATG	-	124407324-124407373	8q24.13b-q24.13c			Interacting selectively with a nucleotide, any compound consisting of a nucleoside that is esterified with (ortho)phosphate or an oligophosphate at any hydroxyl group on the ribose or deoxyribose moiety [goid 166] [evidence IEA]; Interacting selectively with ATP, adenosine 5'-triphosphate, a universally important coenzyme and enzyme regulator [goid 5524] [evidence IEA]; Catalysis of the reaction:…	DKFZp667N1320; MGC29843; MGC131938; MGC5254; MGC142216; PRO2000
ILMN_3235282	ATAD2B	ATAD2B	NO	NM_017552.1	ATAD2B	2	Homo sapiens ATPase family, AAA domain containing 2B (ATAD2B), mRNA.	MGC88424; KIAA1240	ATAD2B	1230131	Homo sapiens	RefSeq	ILMN_306965	NM_017552.1	NM_017552.1		54454	153792535	NM_017552.1	NP_060022.1	1230131	S	7432	GTGGGGACCCTGGGGGCTTTTTGAAGATGATGGAACCGCACTAGGGTTGA	-	23972767-23972816	2p24.1a-p23.3d			Interacting selectively with a nucleotide, any compound consisting of a nucleoside that is esterified with (ortho)phosphate or an oligophosphate at any hydroxyl group on the ribose or deoxyribose moiety [goid 166] [evidence IEA]; Interacting selectively with ATP, adenosine 5'-triphosphate, a universally important coenzyme and enzyme regulator [goid 5524] [evidence IEA]; Catalysis of the reaction:…	MGC88424; KIAA1240
ILMN_1768994	BAGE	BAGE	NO	NM_001187.1	BAGE	21	Homo sapiens B melanoma antigen (BAGE), mRNA.	BAGE1	BAGE	2320184	Homo sapiens	RefSeq	ILMN_10365	NM_001187.1	NM_001187.1		574	4557346	NM_001187.1	NP_001178.1	2320184	S	174	CGGTAGGAGTGGGGCTGGAGCAGTAAGATGGCGGCCAGAGCGGTTTTTCT	-	10119509-10119517:10120594-10120608:10120609-10120634	21p11.1d	The space external to the outermost structure of a cell. For cells without external protective or external encapsulating structures this refers to space outside of the plasma membrane. This term covers the host cell environment outside an intracellular parasite [goid 5576] [evidence IEA]			BAGE1
ILMN_2168766	BAGE2	BAGE2	NO	NM_182482.1	BAGE2		Homo sapiens B melanoma antigen family, member 2 (BAGE2), mRNA.		BAGE2	4880196	Homo sapiens	RefSeq	ILMN_10801	NM_182482.1	NM_182482.1		85319	32699150	NM_182482.1	NP_872288.1	4880196	S	1570	GGCAGTGCCATTTGGAGCATCAAAGTGGGCCATGGGTCTGGATTTCCAAG				The space external to the outermost structure of a cell. For cells without external protective or external encapsulating structures this refers to space outside of the plasma membrane. This term covers the host cell environment outside an intracellular parasite [goid 5576] [evidence IEA]
ILMN_2069267	BAGE3	BAGE3	NO	NM_182481.1	BAGE3		Homo sapiens B melanoma antigen family, member 3 (BAGE3), mRNA.		BAGE3	7510528	Homo sapiens	RefSeq	ILMN_10674	NM_182481.1	NM_182481.1		85318	32699148	NM_182481.1	NP_872287.1	7510528	S	1550	TTAAACCCAGGCAGCTTCCTGGCAGTGCCATTTGGAGCACAAAAGTGGGC				The space external to the outermost structure of a cell. For cells without external protective or external encapsulating structures this refers to space outside of the plasma membrane. This term covers the host cell environment outside an intracellular parasite [goid 5576] [evidence IEA]
ILMN_1697549	BAGE4	BAGE4	NO	NM_181704.1	BAGE4	21	Homo sapiens B melanoma antigen family, member 4 (BAGE4), mRNA.	MGC119852; MGC119853; MLL3P; MGC119851	BAGE4	380139	Homo sapiens	RefSeq	ILMN_10569	NM_181704.1	NM_181704.1		85317	32699146	NM_181704.1	NP_859055.1	380139	S	343	GAGACAGCAGCTCAACAGGAACAATAGGAGGGTACCCGTGGAGGCCAAGT	-	10113112-10113141:10117244-10117263	21p11.1d	The space external to the outermost structure of a cell. For cells without external protective or external encapsulating structures this refers to space outside of the plasma membrane. This term covers the host cell environment outside an intracellular parasite [goid 5576] [evidence IEA]			MGC119852; MGC119853; MLL3P; MGC119851
ILMN_2138135	BAGE4	BAGE4	NO	NM_181704.1	BAGE4	21	Homo sapiens B melanoma antigen family, member 4 (BAGE4), mRNA.	MGC119852; MGC119853; MLL3P; MGC119851	BAGE4	2940440	Homo sapiens	RefSeq	ILMN_10569	NM_181704.1	NM_181704.1		85317	32699146	NM_181704.1	NP_859055.1	2940440	S	1449	CCAACAACTTACATCTCAGTCACTCCAAAAAACTGGCATGGGTAAACCAG	-	10060646-10060695	21p11.1d	The space external to the outermost structure of a cell. For cells without external protective or external encapsulating structures this refers to space outside of the plasma membrane. This term covers the host cell environment outside an intracellular parasite [goid 5576] [evidence IEA]			MGC119852; MGC119853; MLL3P; MGC119851
ILMN_2206141	BAGE5	BAGE5	NO	NM_182484.1	BAGE5		Homo sapiens B melanoma antigen family, member 5 (BAGE5), mRNA.		BAGE5	7380148	Homo sapiens	RefSeq	ILMN_14146	NM_182484.1	NM_182484.1		85316	32699144	NM_182484.1	NP_872290.1	7380148	S	1791	TGGCCAAGGAGCAGAAGGAGGATTACTTGCCTGTTCTCAGTGTGGTCAGT				The space external to the outermost structure of a cell. For cells without external protective or external encapsulating structures this refers to space outside of the plasma membrane. This term covers the host cell environment outside an intracellular parasite [goid 5576] [evidence IEA]
ILMN_1667928	BRDT	BRDT	NO	NM_001726.2	BRDT	1	Homo sapiens bromodomain, testis-specific (BRDT), transcript variant 1, mRNA.	BRD6	BRDT	4150097	Homo sapiens	RefSeq	ILMN_29668	NM_207189.1	NM_207189.1		676	46399199	NM_207189.1	NP_997072.1	4150097	A	2907	GGAGGAGAGAAGCAATGGTGGGTACCATTGATATGACCCTTCAAAGTGAC	+	92243431-92243444:92252351-92252386	1p22.1e	A membrane-bounded organelle of eukaryotic cells in which chromosomes are housed and replicated. In most cells, the nucleus contains all of the cell's chromosomes except the organellar chromosomes, and is the site of RNA synthesis and processing. In some species, or in specialized cell types, RNA metabolism or DNA replication may be absent [goid 5634] [pmid 9367677] [evidence TAS]	The synthesis of either RNA on a template of DNA or DNA on a template of RNA [goid 6350] [evidence IEA]; Any process that modulates the frequency, rate or extent of DNA-dependent transcription [goid 6355] [evidence IEA]	The function of a transcription cofactor that activates transcription from a RNA polymerase II promoter; does not bind DNA itself [goid 3713] [pmid 10365964] [evidence TAS]; Catalysis of the reaction: ATP + a protein serine/threonine = ADP + protein serine/threonine phosphate [goid 4674] [pmid 9367677] [evidence TAS]	BRD6
ILMN_1750821	BRDT	BRDT	NO	NM_207189.1	BRDT	1	Homo sapiens bromodomain, testis-specific (BRDT), transcript variant 1, mRNA.	BRD6	BRDT	240440	Homo sapiens	RefSeq	ILMN_29668	NM_207189.1	NM_207189.1		676	46399199	NM_207189.1	NP_997072.1	240440	I	47	TCAACATCGTGCGACAGTCCGGGCAGTTGAGAAGGCCACCCCGCTTCGTG	+	92187766-92187815	1p22.1e	A membrane-bounded organelle of eukaryotic cells in which chromosomes are housed and replicated. In most cells, the nucleus contains all of the cell's chromosomes except the organellar chromosomes, and is the site of RNA synthesis and processing. In some species, or in specialized cell types, RNA metabolism or DNA replication may be absent [goid 5634] [pmid 9367677] [evidence TAS]	The synthesis of either RNA on a template of DNA or DNA on a template of RNA [goid 6350] [evidence IEA]; Any process that modulates the frequency, rate or extent of DNA-dependent transcription [goid 6355] [evidence IEA]	The function of a transcription cofactor that activates transcription from a RNA polymerase II promoter; does not bind DNA itself [goid 3713] [pmid 10365964] [evidence TAS]; Catalysis of the reaction: ATP + a protein serine/threonine = ADP + protein serine/threonine phosphate [goid 4674] [pmid 9367677] [evidence TAS]	BRD6
ILMN_2247703	BRDT	BRDT	NO	NM_001726.2	BRDT	1	Homo sapiens bromodomain, testis-specific (BRDT), transcript variant 2, mRNA.	BRD6	BRDT	6130463	Homo sapiens	RefSeq	ILMN_20696	NM_001726.2	NM_001726.2		676	46399197	NM_001726.2	NP_001717.2	6130463	I	3	GTGCAGATGTTCCTGGGAGGTCAAGTTAAGAGTCAAAAATAATTCATTAG	+	92190336-92190385	1p22.1e	A membrane-bounded organelle of eukaryotic cells in which chromosomes are housed and replicated. In most cells, the nucleus contains all of the cell's chromosomes except the organellar chromosomes, and is the site of RNA synthesis and processing. In some species, or in specialized cell types, RNA metabolism or DNA replication may be absent [goid 5634] [pmid 9367677] [evidence TAS]	The synthesis of either RNA on a template of DNA or DNA on a template of RNA [goid 6350] [evidence IEA]; Any process that modulates the frequency, rate or extent of DNA-dependent transcription [goid 6355] [evidence IEA]	The function of a transcription cofactor that activates transcription from a RNA polymerase II promoter; does not bind DNA itself [goid 3713] [pmid 10365964] [evidence TAS]; Catalysis of the reaction: ATP + a protein serine/threonine = ADP + protein serine/threonine phosphate [goid 4674] [pmid 9367677] [evidence TAS]	BRD6
ILMN_1811068	CABYR	CABYR	NO	NM_153770.1	CABYR	18	Homo sapiens calcium binding tyrosine-(Y)-phosphorylation regulated (CABYR), transcript variant 5, mRNA.	MGC9117; FSP-2; CBP86	CABYR	1010201	Homo sapiens	RefSeq	ILMN_15893	NM_138643.1	NM_138643.1		26256	24797109	NM_138643.1	NP_619584.1	1010201	A	353	TCCAAACCAGCCACCCCTAAGACTACTACCCCACCCTCATCACCACCTCC	+	19989887-19989936	18q11.2c	A membrane-bounded organelle of eukaryotic cells in which chromosomes are housed and replicated. In most cells, the nucleus contains all of the cell's chromosomes except the organellar chromosomes, and is the site of RNA synthesis and processing. In some species, or in specialized cell types, RNA metabolism or DNA replication may be absent [goid 5634] [evidence IEA]; All of the contents of a cell…	The cascade of processes by which a signal interacts with a receptor, causing a change in the level or activity of a second messenger or other downstream target, and ultimately effecting a change in the functioning of the cell [goid 7165] [evidence IEA]	The action of a molecule that contributes to the structural integrity of a complex or assembly within or outside a cell [goid 5198] [evidence IEA]; Interacting selectively with calcium ions (Ca2+) [goid 5509] [evidence IEA]; Modulation of the activity of the enzyme cAMP-dependent protein kinase [goid 8603] [evidence IEA]	MGC9117; FSP-2; CBP86
ILMN_2412139	CABYR	CABYR	NO	NM_153768.1	CABYR	18	Homo sapiens calcium binding tyrosine-(Y)-phosphorylation regulated (CABYR), transcript variant 2, mRNA.	MGC9117; FSP-2; CBP86	CABYR	6250131	Homo sapiens	RefSeq	ILMN_9439	NM_153768.1	NM_153768.1		26256	24797113	NM_153768.1	NP_722452.1	6250131	A	2127	TACGGTATTGCTGGGGAGGTAACCGTGACTACTGCTCACAAACGTCGCAA	+	19993964-19994013	18q11.2c	A membrane-bounded organelle of eukaryotic cells in which chromosomes are housed and replicated. In most cells, the nucleus contains all of the cell's chromosomes except the organellar chromosomes, and is the site of RNA synthesis and processing. In some species, or in specialized cell types, RNA metabolism or DNA replication may be absent [goid 5634] [evidence IEA]; All of the contents of a cell…	The cascade of processes by which a signal interacts with a receptor, causing a change in the level or activity of a second messenger or other downstream target, and ultimately effecting a change in the functioning of the cell [goid 7165] [evidence IEA]	The action of a molecule that contributes to the structural integrity of a complex or assembly within or outside a cell [goid 5198] [evidence IEA]; Interacting selectively with calcium ions (Ca2+) [goid 5509] [evidence IEA]; Modulation of the activity of the enzyme cAMP-dependent protein kinase [goid 8603] [evidence IEA]	MGC9117; FSP-2; CBP86
ILMN_1745724	CAGE1	CAGE1	NO	NM_205864.1	CAGE1	6	Homo sapiens cancer antigen 1 (CAGE1), mRNA.	bA69L16.7; FLJ40441; CTAG3	CAGE1	6330546	Homo sapiens	RefSeq	ILMN_7023	NM_205864.2	NM_205864.2		285782	111548658	NM_205864.2	NP_995586.1	6330546	I	150	AGGGGGTCGTACCTTCCTAACTTCACCACTCTCTGGGAAGACACCGCACC	-	7389743-7389792	6p24.3c				bA69L16.7; FLJ40441; CTAG3
ILMN_1779155	CAGE1	CAGE1	NO	NM_175745.3	CAGE1	6	Homo sapiens cancer antigen 1 (CAGE1), transcript variant 1, mRNA.	bA69L16.7; FLJ40441; CTAG3	CAGE1	2350193	Homo sapiens	RefSeq	ILMN_16352	NM_175745.3	NM_175745.3		285782	45505176	NM_175745.3	NP_786887.1	2350193	I	2233	CTACTGAAACATAAAGATAGAATCACAACCTTTAGAGAGTTAATTGCTAA	-	7311066-7311115	6p24.3c				bA69L16.7; FLJ40441; CTAG3
ILMN_2167223	CALR3	CALR3	NO	NM_145046.2	CALR3	19	Homo sapiens calreticulin 3 (CALR3), mRNA.	FLJ25355; MGC26577; CRT2	CALR3	150564	Homo sapiens	RefSeq	ILMN_20160	NM_145046.2	NM_145046.2		125972	34222181	NM_145046.2	NP_659483.1	150564	S	946	GAGAACATTGGTGCCATTGGCCTGGAGCTTTGGCAGGTGAGATCTGGAAC	-	16452503-16452517:16454261-16454295	19p13.11f	The irregular network of unit membranes, visible only by electron microscopy, that occurs in the cytoplasm of many eukaryotic cells. The membranes form a complex meshwork of tubular channels, which are often expanded into slitlike cavities called cisternae. The ER takes two forms, rough (or granular), with ribosomes adhering to the outer surface, and smooth (with no ribosomes attached) [goid 5783…	The process of assisting in the covalent and noncovalent assembly of single chain polypeptides or multisubunit complexes into the correct tertiary structure [goid 6457] [evidence IEA]	Interacting selectively with calcium ions (Ca2+) [goid 5509] [evidence IEA]; Interacting selectively with any mono-, di- or trisaccharide carbohydrate [goid 5529] [evidence IEA]; Interacting selectively with zinc (Zn) ions [goid 8270] [evidence IEA]; Interacting selectively with an unfolded protein [goid 51082] [evidence IEA]	FLJ25355; MGC26577; CRT2
ILMN_2163206	CCDC110	CCDC110	NO	NM_152775.1	CCDC110	4	Homo sapiens coiled-coil domain containing 110 (CCDC110), mRNA.	MGC33607; KMHN1; KM-HN-1	CCDC110	4560433	Homo sapiens	RefSeq	ILMN_15423	NM_152775.1	NM_152775.1		256309	22749514	NM_152775.1	NP_689988.1	4560433	S	2449	CTCACGAAGATACTTCTAGTCCTCAGAGTAGGCCTTTGGCTTCGGATTTG	-	186616276-186616325	4q35.1f	A membrane-bounded organelle of eukaryotic cells in which chromosomes are housed and replicated. In most cells, the nucleus contains all of the cell's chromosomes except the organellar chromosomes, and is the site of RNA synthesis and processing. In some species, or in specialized cell types, RNA metabolism or DNA replication may be absent [goid 5634] [evidence IEA]			MGC33607; KMHN1; KM-HN-1
ILMN_1681136	CCDC33	CCDC33	NO	NM_182791.1	CCDC33	15	Homo sapiens coiled-coil domain containing 33 (CCDC33), transcript variant 1, mRNA.	FLJ23168; FLJ32855; MGC34145	CCDC33	830465	Homo sapiens	RefSeq	ILMN_179423	NM_025055.3	NM_025055.3		80125	117168272	NM_025055.3	NP_079331.3	830465	S	2675	GCCTCCTTCCCTGTGTGCTGGGGAGTCTCATCACCGCCCCCTAAAAATGA	+	72415460-72415509	15q24.1b				MGC34145; FLJ23168; FLJ32855
ILMN_1722863	CCDC36	CCDC36	NO	NM_178173.2	CCDC36	3	Homo sapiens coiled-coil domain containing 36 (CCDC36), mRNA.	FLJ25320	CCDC36	5860408	Homo sapiens	RefSeq	ILMN_29293	NM_178173.2	NM_178173.2		339834	31342337	NM_178173.2	NP_835467.1	5860408	S	2284	CCTGCTGAGGTGGGGCAATGAGCACGAGGGCAGGGAAGGTCCAGCATTCT	+	49269831-49269880	3p21.31d				FLJ25320
ILMN_1663370	CCDC62	CCDC62	NO	NM_201435.2	CCDC62	12	Homo sapiens coiled-coil domain containing 62 (CCDC62), transcript variant 2, mRNA.	aaa; FLJ25432; TSP-NY; FLJ40344	CCDC62	2450500	Homo sapiens	RefSeq	ILMN_27533	NM_201435.2	NM_201435.2		84660	75677375	NM_201435.2	NP_958843.2	2450500	I	2772	TAGCTCGAGGTCCTTCTGTCCCAAGCTGAGCAGAGCCCCATCTTTCTGGG	+	121877453-121877502	12q24.31d				aaa; FLJ25432; TSP-NY; FLJ40344
ILMN_1701905	CCDC62	CCDC62	NO	NM_032573.3	CCDC62	12	Homo sapiens coiled-coil domain containing 62 (CCDC62), transcript variant 1, mRNA.	aaa; FLJ25432; TSP-NY; FLJ40344	CCDC62	5490463	Homo sapiens	RefSeq	ILMN_22278	NM_032573.3	NM_032573.3		84660	41393543	NM_032573.3	NP_115962.2	5490463	A	2058	TGGCGGAATCTCGTCAGATGGTGACGGACCTGGAGCTGAGCACACTGCTG	+	121863831-121863880	12q24.31d				aaa; FLJ25432; TSP-NY; FLJ40344
ILMN_1792296	CCDC83	CCDC83	NO	NM_173556.2	CCDC83	11	Homo sapiens coiled-coil domain containing 83 (CCDC83), mRNA.	HSD9; MGC34732; FLJ42119	CCDC83	6620377	Homo sapiens	RefSeq	ILMN_166077	NM_173556.3	NM_173556.3		220047	141803479	NM_173556.3	NP_775827.2	6620377	S	2073	CAGAAGCATGACAGTGGGTTCAAGGTAGTCTCTGAGGTTCCTTTTCACAC	+	85308427-85308476	11q14.1e-q14.2a
ILMN_2157099	CCNA1	CCNA1	NO	NM_003914.2	CCNA1	13	Homo sapiens cyclin A1 (CCNA1), mRNA.		CCNA1	7400279	Homo sapiens	RefSeq	ILMN_11325	NM_003914.2	NM_003914.2		8900	16306528	NM_003914.2	NP_003905.1	7400279	S	1182	CTTGAGGCGACAAGGAGTGTGCGTCAGGACTGAGAACCTGGCTAAGTACG	+	35912278-35912320:35913255-35913261	13q13.3b	A membrane-bounded organelle of eukaryotic cells in which chromosomes are housed and replicated. In most cells, the nucleus contains all of the cell's chromosomes except the organellar chromosomes, and is the site of RNA synthesis and processing. In some species, or in specialized cell types, RNA metabolism or DNA replication may be absent [goid 5634] [evidence IEA]; That part of the cytoplasm th…	The progression of biochemical and morphological phases and events that occur in a cell during successive cell replication or nuclear replication events. Canonically, the cell cycle comprises the replication and segregation of genetic material followed by the division of the cell, but in endocycles or syncytial cells nuclear replication or nuclear division may not be followed by cell division [go…	Interacting selectively with any protein or protein complex (a complex of two or more proteins that may include other nonprotein molecules) [goid 5515] [pmid 17353931] [evidence IPI]; Interacting selectively with any protein or protein complex (a complex of two or more proteins that may include other nonprotein molecules) [goid 5515] [pmid 15232106] [evidence IPI]; Interacting selectively with an…
ILMN_1746832	CEP290	CEP290	NO	NM_025114.2	CEP290	12	Homo sapiens centrosomal protein 290kDa (CEP290), mRNA.	FLJ21979; FLJ13615; KIAA0373; 3H11Ag; 3H11	CEP290	4780112	Homo sapiens	RefSeq	ILMN_4007	NM_025114.2	NM_025114.2		80184	51890222	NM_025114.2	NP_079390.2	4780112	S	7434	GCTAACAAGGACCAAAGTGGAGCTGAAAGCACCATACCTGATGCTGATCA	-	86968331-86968341:86971560-86971598	12q21.32a	A multiprotein complex composed of gamma-tubulin and other non-tubulin proteins. Gamma-tubulin complexes are localized to microtubule organizing centers, and play an important role in the nucleation of microtubules. The number and complexity of non-tubulin proteins associated with these complexes varies between species [goid 930] [pmid 16682973] [evidence IDA]; A membrane-bounded organelle of euk…	The directed movement of proteins into, out of, within or between cells [goid 15031] [evidence ISS]; A process that is carried out at the cellular level which results in the formation, arrangement of constituent parts, or disassembly of a prolongation or process extending from a cell, e.g. a flagellum or axon [goid 30030] [evidence IEA]; The process whose specific outcome is the progression of th…	Interacting selectively with any protein or protein complex (a complex of two or more proteins that may include other nonprotein molecules) [goid 5515] [pmid 16682973] [evidence IPI]; Any transcription regulator activity required for initiation or upregulation of transcription [goid 16563] [pmid 16682973] [evidence IDA]; Interacting selectively with the minus end of a microtubule [goid 51011] [pm…	FLJ21979; FLJ13615; KIAA0373; 3H11Ag; 3H11
ILMN_1747016	CEP55	CEP55	NO	NM_018131.3	CEP55	10	Homo sapiens centrosomal protein 55kDa (CEP55), mRNA.	URCC6; C10orf3; FLJ10540	CEP55	7510709	Homo sapiens	RefSeq	ILMN_6470	NM_018131.3	NM_018131.3		55165	34147683	NM_018131.3	NP_060601.2	7510709	S	2237	GCTGTGTTCCCCAACTCTGTTCTGCGCACGAAACAGTATCTGTTTGAGGC	+	95278458-95278507	10q23.33b		The progression of biochemical and morphological phases and events that occur in a cell during successive cell replication or nuclear replication events. Canonically, the cell cycle comprises the replication and segregation of genetic material followed by the division of the cell, but in endocycles or syncytial cells nuclear replication or nuclear division may not be followed by cell division [go…		URCC6; C10orf3; FLJ10540
ILMN_2044085	CNOT9	RQCD1	YES	NM_005444.1	RQCD1	2	Homo sapiens RCD1 required for cell differentiation1 homolog (S. pombe) (RQCD1), mRNA.	RCD1; CNOT9; RCD1+	RQCD1	7050138	Homo sapiens	RefSeq	ILMN_29301	NM_005444.1	NM_005444.1		9125	4885578	NM_005444.1	NP_005435.1	7050138	S	636	CTTGGGTAAGATGGTCCTGCAGCTATCCAAAGAGCCTTCTGCCCGTCTGC	+	219165366-219165369:219165583-219165628	2q35e	A membrane-bounded organelle of eukaryotic cells in which chromosomes are housed and replicated. In most cells, the nucleus contains all of the cell's chromosomes except the organellar chromosomes, and is the site of RNA synthesis and processing. In some species, or in specialized cell types, RNA metabolism or DNA replication may be absent [goid 5634] [evidence IEA]	The synthesis of either RNA on a template of DNA or DNA on a template of RNA [goid 6350] [evidence IEA]; Any process that modulates the frequency, rate or extent of DNA-dependent transcription [goid 6355] [evidence IEA]; The establishment of the sex of an organism by physical differentiation [goid 7548] [pmid 9447985] [evidence TAS]; Any series of molecular signals generated as a consequence of a…	The selective, often stoichiometric, interaction of a molecule with one or more specific sites on another molecule [goid 5488] [evidence IEA]	RCD1; CNOT9; RCD1+
ILMN_1725547	COX6B2	COX6B2	NO	NM_144613.3	COX6B2	19	Homo sapiens cytochrome c oxidase subunit VIb polypeptide 2 (testis) (COX6B2), mRNA.	COXVIB2; FLJ32865; MGC119094	COX6B2	2370653	Homo sapiens	RefSeq	ILMN_22223	NM_144613.3	NM_144613.3		125965	40538807	NM_144613.3	NP_653214.2	2370653	S	1596	CTGAGACTCCCTGCTCCGCTGCCCTCTTTGTCTAAGAGCTGTGGCAACAG	-	60552784-60552833	19q13.42b	A semiautonomous, self replicating organelle that occurs in varying numbers, shapes, and sizes in the cytoplasm of virtually all eukaryotic cells. It is notably the site of tissue respiration [goid 5739] [evidence IEA]; The region between the inner and outer lipid bilayers of the mitochondrial envelope [goid 5758] [evidence IEA]; Any of the inward folds of the mitochondrial inner membrane. Their …		Catalysis of the transfer of a solute or solutes from one side of a membrane to the other according to the reaction: 4 ferrocytochrome c + O2 = 4 ferricytochrome c + 2 H2O [goid 4129] [evidence IEA]	COXVIB2; FLJ32865; MGC119094
ILMN_2176467	COX6B2	COX6B2	NO	NM_144613.4	COX6B2	19	Homo sapiens cytochrome c oxidase subunit VIb polypeptide 2 (testis) (COX6B2), mRNA.	COXVIB2; MGC119094	COX6B2	2640112	Homo sapiens	RefSeq	ILMN_22223	NM_144613.4	NM_144613.4		125965	93277117	NM_144613.4	NP_653214.2	2640112	S	1568	GAGAGGCGGATACAGAAACTTGTGAGAATGTGATGAACGCTCTGAACCCC	-	60552927-60552976	19q13.42b	A semiautonomous, self replicating organelle that occurs in varying numbers, shapes, and sizes in the cytoplasm of virtually all eukaryotic cells. It is notably the site of tissue respiration [goid 5739] [evidence IEA]; The region between the inner and outer lipid bilayers of the mitochondrial envelope [goid 5758] [evidence IEA]; Any of the inward folds of the mitochondrial inner membrane. Their …		Catalysis of the transfer of a solute or solutes from one side of a membrane to the other according to the reaction: 4 ferrocytochrome c + O2 = 4 ferricytochrome c + 2 H2O [goid 4129] [evidence IEA]	COXVIB2; FLJ32865; MGC119094
ILMN_1749653	CPXCR1	CPXCR1	NO	NM_033048.3	CPXCR1	X	Homo sapiens CPX chromosome region, candidate 1 (CPXCR1), mRNA.		CPXCR1	2570196	Homo sapiens	RefSeq	ILMN_21577	NM_033048.4	NM_033048.4		53336	153792481	NM_033048.4	NP_149037.3	2570196	S	854	CCTTCGAGGGTGCACTACTACCGTCCCCTCACTGAGAGAATGACATCAGG	+	87895666-87895715	Xq21.31b	The living contents of a cell; the matter contained within (but not including) the plasma membrane, usually taken to exclude large vacuoles and masses of secretory or ingested material. In eukaryotes it includes the nucleus and cytoplasm [goid 5622] [evidence IEA]		Interacting selectively with zinc (Zn) ions [goid 8270] [evidence IEA]
ILMN_2176529	CPXCR1	CPXCR1	NO	NM_033048.3	CPXCR1	X	Homo sapiens CPX chromosome region, candidate 1 (CPXCR1), mRNA.		CPXCR1	6770039	Homo sapiens	RefSeq	ILMN_168493	NM_033048.3	NM_033048.3		53336	34222348	NM_033048.3	NP_149037.2	6770039	S	1495	GGAAGGCCAGACAAAGTTCTACCAAGTGTTTCCAGAGATTCTGCTACATG	+	87896337-87896386	Xq21.31b	The living contents of a cell; the matter contained within (but not including) the plasma membrane, usually taken to exclude large vacuoles and masses of secretory or ingested material. In eukaryotes it includes the nucleus and cytoplasm [goid 5622] [evidence IEA]		Interacting selectively with zinc (Zn) ions [goid 8270] [evidence IEA]
ILMN_1775569	CRISP2	CRISP2	NO	NM_003296.1	CRISP2	6	Homo sapiens cysteine-rich secretory protein 2 (CRISP2), mRNA.	MGC111136; TPX1; GAPDL5; TSP1; CRISP-2	CRISP2	4280487	Homo sapiens	RefSeq	ILMN_29809	NM_003296.1	NM_003296.1		7180	4507670	NM_003296.1	NP_003287.1	4280487	S	1082	GCAATGCATCTTCTCCCCCAGATCATCACAGAAATCACTTTCAGGCAATG	-	49768282-49768331	6p12.3b	The space external to the outermost structure of a cell. For cells without external protective or external encapsulating structures this refers to space outside of the plasma membrane. This term covers the host cell environment outside an intracellular parasite [goid 5576] [evidence IEA]; The space external to the outermost structure of a cell. For cells without external protective or external en…			MGC111136; TPX1; GAPDL5; TSP1; CRISP-2
ILMN_1737640	CSAG1	CSAG1	NO	NM_153479.1	CSAG1	X	Homo sapiens chondrosarcoma associated gene 1 (CSAG1), transcript variant b, mRNA.	CSAGE	CSAG1	3830202	Homo sapiens	RefSeq	ILMN_15324	NM_153479.1	NM_153479.1		158511	24234762	NM_153479.1	NP_705612.1	3830202	A	472	AGGAGACCACCGCCTTCTCCAGTGCTTCCTTGGGCAGCCAGTAATTCCCA	+	151659980-151660029	Xq28e				CSAGE
ILMN_1815439	CSAG1	CSAG1	NO	NM_153478.1	CSAG1	X	Homo sapiens chondrosarcoma associated gene 1 (CSAG1), transcript variant a, mRNA.	CSAGE	CSAG1	6290520	Homo sapiens	RefSeq	ILMN_22432	NM_153478.1	NM_153478.1		158511	24234759	NM_153478.1	NP_705611.1	6290520	I	176	CGGGAGCTCCTCTCCAGCCAGAGCTACACTTGGCAAACCTTTGGTCCTAA	+	151654490-151654539	Xq28e				CSAGE
ILMN_1741604	CSAG2	CSAG2	NO	NM_004909.1	CSAG2		Homo sapiens CSAG family, member 2 (CSAG2), mRNA.	TRAG3; MGC149852; MGC149851	CSAG2	1230424	Homo sapiens	RefSeq	ILMN_18036	NM_004909.2	NM_004909.2		9598	142373405	NM_004909.2	NP_004900.1	1230424	S	407	CACCAAAGAGGTTCCCAAGACAACTCGGAAGGGAAAAGGGACCCATCGAG			Xq28e		A change in state or activity of a cell or an organism (in terms of movement, secretion, enzyme production, gene expression, etc.) as a result of a drug stimulus. A drug is a substance used in the diagnosis, treatment or prevention of a disease [goid 42493] [pmid 10095106] [evidence TAS]		TRAG3; MGC149852; MGC149851
ILMN_1679921	CT45A1	CT45A1	NO	NM_001017417.1	CT45A1	X	Homo sapiens cancer/testis antigen family 45, member A1 (CT45A1), mRNA.		CT45A1	5860674	Homo sapiens	RefSeq	ILMN_22935	NM_001017417.1	NM_001017417.1		541466	62899068	NM_001017417.1	NP_001017417.1	5860674	S	555	GGAGATGACCTAGAATGCAGAGAAACAGCCTCCTCTCCCAAAAGCCAACG	+	134682596-134682645	Xq26.3b
ILMN_2088560	CT45A1	CT45A1	NO	NM_001017417.1	CT45A1	X	Homo sapiens cancer/testis antigen family 45, member A1 (CT45A1), mRNA.		CT45A1	1940424	Homo sapiens	RefSeq	ILMN_22935	NM_001017417.1	NM_001017417.1		541466	62899068	NM_001017417.1	NP_001017417.1	1940424	S	57	TTTGGACCAAACGGGATCGGTGCTTCTGGTGAGACGCCTCCCCATGCACA	+	134674907-134674956	Xq26.3b
ILMN_2088565	CT45A1	CT45A1	NO	NM_001017417.1	CT45A1	X	Homo sapiens cancer/testis antigen family 45, member A1 (CT45A1), mRNA.		CT45A1	2320670	Homo sapiens	RefSeq	ILMN_22935	NM_001017417.1	NM_001017417.1		541466	62899068	NM_001017417.1	NP_001017417.1	2320670	S	248	GACCGATAAAACAGAGAAGGTGGCTGTAGATCCTGAAACTGTGTTTAAAC	+	134680370-134680419	Xq26.3b
ILMN_1664918	CT45A2	CT45-2	YES	NM_152582.3	CT45-2		Homo sapiens cancer/testis antigen CT45-2 (CT45-2), mRNA.		CT45-2	7650014	Homo sapiens	RefSeq	ILMN_20554	NM_152582.3	NM_152582.3		158852	37537697	NM_152582.3	NP_689795.2	7650014	S	964	CAGAGGCTAAGAAATTTCTGTTAGTAAAAGATGTTCTTTTTCCCAAAAAA			Xq26.3b
ILMN_1672783	CT45A3	CT45A4	YES	NM_001017436.1	CT45A4	X	Homo sapiens cancer/testis antigen family 45, member A4 (CT45A4), mRNA.		CT45A4	5820551	Homo sapiens	RefSeq	ILMN_23269	NM_001017436.1	NM_001017436.1		441520	62945407	NM_001017436.1	NP_001017436.1	5820551	S	906	AATGGAGCAGGATATTGCTGAAGTCTCCTGGCATATGTTACCGAATCAAA	-	134928749-134928798	Xq26.3b
ILMN_1757689	CT45A3	CT45A4	YES	NM_001017435.1	CT45A4	X	Homo sapiens cancer/testis antigen family 45, member A4 (CT45A4), mRNA.		CT45A4	1230603	Homo sapiens	RefSeq	ILMN_23269	NM_001017436.1	NM_001017436.1		441520	62945407	NM_001017436.1	NP_001017436.1	1230603	S	813	TGAGAATACTTGTCCCTGGAGGATTATCACACCCCAAATGCATAATCTCG	-	134928842-134928889:134928890-134928891	Xq26.3b				RP13-36C9.1
ILMN_2135944	CT45A3	CT45A4	YES	NM_001017436.1	CT45A4	X	Homo sapiens cancer/testis antigen family 45, member A4 (CT45A4), mRNA.		CT45A4	7510128	Homo sapiens	RefSeq	ILMN_23269	NM_001017436.1	NM_001017436.1		441520	62945407	NM_001017436.1	NP_001017436.1	7510128	S	921	TGCTGAAGTCTCCTGGCATATGTTACCGAATCAAATAGCCTTCCAGAGGC	-	134928734-134928783	Xq26.3b
ILMN_1670627	CT45A5	CT45A5	NO	NM_001007551.2	CT45A5	X	Homo sapiens cancer/testis antigen family 45, member A5 (CT45A5), mRNA.		CT45A5	1690717	Homo sapiens	RefSeq	ILMN_23506	NM_001007551.2	NM_001007551.2		441521	61657911	NM_001007551.2	NP_001007552.1	1690717	S	544	GCAATTTCTCTGGAGATGACCTAGAATGCAGAGGAATAGCCTCCTCTCCC	-	134947976-134948025	Xq26.3b
ILMN_2291565	CT45A5	CT45A5	NO	NM_001007551.2	CT45A5	X	Homo sapiens cancer/testis antigen family 45, member A5 (CT45A5), mRNA.		CT45A5	4670747	Homo sapiens	RefSeq	ILMN_179652	NM_001007551.2	NM_001007551.2		441521	61657911	NM_001007551.2	NP_001007552.1	4670747	I	948	GAATCAACTGGCCTTCCAGAGGCTAAGAAATTTCTGTTAGTAAAAGATGT	-	134945974-134946023	Xq26.3b
ILMN_2402042	CT45A5	CT45A5	NO	NM_001007551.2	CT45A5	X	Homo sapiens cancer/testis antigen family 45, member A5 (CT45A5), mRNA.		CT45A5	2190446	Homo sapiens	RefSeq	ILMN_179652	NM_001007551.2	NM_001007551.2		441521	61657911	NM_001007551.2	NP_001007552.1	2190446	A	545	CAATTTCTCTGGAGATGACCTAGAATGCAGAGGAATAGCCTCCTCTCCCA	-	134947975-134948024	Xq26.3b
ILMN_1713126	CT45A6	CT45A6	NO	NM_001017438.1	CT45A6	X	Homo sapiens cancer/testis antigen family 45, member A6 (CT45A6), mRNA.		CT45A6	2600546	Homo sapiens	RefSeq	ILMN_22824	NM_001017438.1	NM_001017438.1		541465	62945409	NM_001017438.1	NP_001017438.1	2600546	S	44	TCCTTCCATCCCCCTTGGGCCAAACAGGATCGGTGCTTCTGGTGAGACGT	-	134971151-134971200	Xq26.3b
ILMN_1673271	CT47A1	CT47A1	NO	XM_926669.1	CT47A1	X	Homo sapiens cancer/testis antigen family 47, member A1 (CT47A1), mRNA.		CT47A1	5310128	Homo sapiens	RefSeq	ILMN_181525	NM_001080146.1	NM_001080146.1		728096	121949801	NM_001080146.1	NP_001073615.1	5310128	S	59	TAGGATTCGCTCCCTGCCCTTCCCATCTTAGGGTGTCGTCTGAGACAGAC	-	120119530-120119579	Xq24e
ILMN_2095078	CT47A1	CT47A1	NO	NM_001080146.1	CT47A1	X	Homo sapiens cancer/testis antigen family 47, member A1 (CT47A1), mRNA.		CT47A1	7050020	Homo sapiens	RefSeq	ILMN_181525	NM_001080146.1	NM_001080146.1		728096	121949801	NM_001080146.1	NP_001073615.1	7050020	S	1	ACCAGAATCTTTCCCAACTTGTCTAAGTCCTCTCAGGCCAGCCTTGGTGG	-	120119588-120119637	Xq24e
ILMN_1654899	CT47A5	CT47A6	YES	XM_926689.1	CT47A6	X	Homo sapiens cancer/testis antigen family 47, member A6 (CT47A6), mRNA.		CT47A6	6270593	Homo sapiens	RefSeq	ILMN_165659	NM_001080141.1	NM_001080141.1		728062	121949793	NM_001080141.1	NP_001073610.1	6270593	S	928	ACAGAGGAACCAGACGCAGAGGAACCAGCCACAGAAGAACCGACCGCACA	-	120094360-120094409	Xq24d-q24e
ILMN_2231845	CT47A5	CT47A6	YES	NM_001080141.1	CT47A6	X	Homo sapiens cancer/testis antigen family 47, member A6 (CT47A6), mRNA.		CT47A6	5670451	Homo sapiens	RefSeq	ILMN_165659	NM_001080141.1	NM_001080141.1		728062	121949793	NM_001080141.1	NP_001073610.1	5670451	S	13	CCCAACTTGTCTAAGTCCTCTCAGGCCAGCCTTGGTGGGAGGTTTCTAGG	-	120095275-120095324	Xq24d-q24e
ILMN_1760573	CT47A7	CT47A7	NO	XM_926686.1	CT47A7	X	Homo sapiens cancer/testis antigen family 47, member A7 (CT47A7), mRNA.		CT47A7	730113	Homo sapiens	RefSeq	ILMN_179043	NM_001080140.1	NM_001080140.1		653282	121949791	NM_001080140.1	NP_001073609.1	730113	S	12	TCCCGCCTTATCTAAGTCCTCTCAGGCCAGACTTGGTGGGAGGTTCCTAG	-	120090393-120090442	Xq24d
ILMN_2057196	CT47A7	CT47A7	NO	NM_001080140.1	CT47A7	X	Homo sapiens cancer/testis antigen family 47, member A7 (CT47A7), mRNA.		CT47A7	2600181	Homo sapiens	RefSeq	ILMN_179043	NM_001080140.1	NM_001080140.1		653282	121949791	NM_001080140.1	NP_001073609.1	2600181	S	1087	GCGGAAAACAAGGTGAAGAACTCCAAAGGGACCTAGACGCAGCAGAGGTG	-	120088431-120088445:120088446-120088480	Xq24d
ILMN_1683761	CT55	CXorf48	YES	NM_017863.2	CXORF48	X	Homo sapiens chromosome X open reading frame 48 (CXorf48), transcript variant 2, mRNA.	FLJ20527; RP13-565O16.1	CXORF48	4920288	Homo sapiens	RefSeq	ILMN_6892	NM_017863.2	NM_017863.2		54967	40254909	NM_017863.2	NP_060333.1	4920288	I	1589	GCTTGCTAGTCACTGGAGGAAAGGAGTTCTTAATTAAAATGAACACGGCC	-	134290983-134291032	Xq26.3a				FLJ20527; RP13-565O16.1
ILMN_1802389	CT55	CXorf48	YES	NM_001031705.1	CXORF48	X	Homo sapiens chromosome X open reading frame 48 (CXorf48), transcript variant 1, mRNA.	FLJ20527; RP13-565O16.1	CXORF48	2060717	Homo sapiens	RefSeq	ILMN_8214	NM_001031705.1	NM_001031705.1		54967	72534699	NM_001031705.1	NP_001026875.1	2060717	A	537	GAGCCAGGCATCTCAAACATCAAGGCAACTTCTGTGAAGCCCATCCGTTG	-	134119805-134119854	Xq26.3a				FLJ20527; RP13-565O16.1
ILMN_1808984	CT55	CXorf48	YES	XM_939090.1	CXORF48		PREDICTED: Homo sapiens chromosome X open reading frame 48 (CXorf48), mRNA.		CXORF48	2140725	Homo sapiens	RefSeq	ILMN_138751	XM_939090.1	XM_939090.1		54967	89061069	XM_939090.1	XP_944183.1	2140725	I	759	AATCAGCTTAGCGGTCCAGACTGTCCTCCTCCACTCCTGCTCCACCCTAG			Xq26.3a
ILMN_2317446	CT55	CXorf48	YES	NM_001031705.1	CXORF48	X	Homo sapiens chromosome X open reading frame 48 (CXorf48), transcript variant 1, mRNA.	FLJ20527; RP13-565O16.1	CXORF48	610220	Homo sapiens	RefSeq	ILMN_8214	NM_001031705.1	NM_001031705.1		54967	72534699	NM_001031705.1	NP_001026875.1	610220	A	1201	TGACTGGGCCAGCAATGATACTTACCTGTGGTTCATTCATCACTGGTTCC	-	134118159-134118208	Xq26.3a				FLJ20527; RP13-565O16.1
ILMN_1668108	CT83	CXorf61	YES	NM_001017978.1	CXORF61	X	Homo sapiens chromosome X open reading frame 61 (CXorf61), mRNA.	FLJ22913; KK-LC-1; FLJ20611; RP3-452H17.2	CXORF61	1050543	Homo sapiens	RefSeq	ILMN_18870	NM_001017978.1	NM_001017978.1		203413	63025189	NM_001017978.1	NP_001017978.1	1050543	S	84	GGGGTCCGTCCCGAGAAGGGAGAAGAGGCCGAAGAGGAAACATGAACTTC	-	115508030-115508045:115508046-115508079	Xq23d				KK-LC-1; RP3-452H17.2; FLJ22913; FLJ20611
ILMN_1652196	CTAG1A	CTAG1A	NO	XM_928479.1	CTAG1A	X	Homo sapiens cancer/testis antigen 1A (CTAG1A), mRNA.	LAGE2A; ESO1	CTAG1A	1430215	Homo sapiens	RefSeq	ILMN_22541	NM_139250.1	NM_139250.1		246100	21281684	NM_139250.1	NP_640343.1	1430215	I	8	TGGGCCCTGACCTTCTCTCTGAGAGCCGGGCAGAGGCTCCGGAGCCATGC	+	153466617-153466664:153466665-153466666	Xq28g	All of the contents of a cell excluding the plasma membrane and nucleus, but including other subcellular structures [goid 5737] [evidence IEA]		Interacting selectively with any protein or protein complex (a complex of two or more proteins that may include other nonprotein molecules) [goid 5515] [pmid 17137291] [evidence IPI]
ILMN_2206411	CTAG1A	CTAG1A	NO	NM_139250.1	CTAG1A	X	Homo sapiens cancer/testis antigen 1A (CTAG1A), mRNA.	LAGE2A; ESO1	CTAG1A	1070577	Homo sapiens	RefSeq	ILMN_22541	NM_139250.1	NM_139250.1		246100	21281684	NM_139250.1	NP_640343.1	1070577	S	1	ATCCTCGTGGGCCCTGACCTTCTCTCTGAGAGCCGGGCAGAGGCTCCGGA	+	153466610-153466659	Xq28g	All of the contents of a cell excluding the plasma membrane and nucleus, but including other subcellular structures [goid 5737] [evidence IEA]		Interacting selectively with any protein or protein complex (a complex of two or more proteins that may include other nonprotein molecules) [goid 5515] [pmid 17137291] [evidence IPI]	ESO1; LAGE2A
ILMN_2206413	CTAG1A	CTAG1A	NO	NM_139250.1	CTAG1A	X	Homo sapiens cancer/testis antigen 1A (CTAG1A), mRNA.	LAGE2A; ESO1	CTAG1A	6770332	Homo sapiens	RefSeq	ILMN_22541	NM_139250.1	NM_139250.1		246100	21281684	NM_139250.1	NP_640343.1	6770332	S	121	TTCCTGATGGCCCAGGGGGCAATGCTGGCGGCCCAGGAGAGGCGGGTGCC	+	153466730-153466779	Xq28g	All of the contents of a cell excluding the plasma membrane and nucleus, but including other subcellular structures [goid 5737] [evidence IEA]		Interacting selectively with any protein or protein complex (a complex of two or more proteins that may include other nonprotein molecules) [goid 5515] [pmid 17137291] [evidence IPI]	ESO1; LAGE2A
ILMN_1719146	CTAG1B	CTAG1B	NO	NM_001327.1	CTAG1B	X	Homo sapiens cancer/testis antigen 1B (CTAG1B), mRNA.	NY-ESO-1; LAGE-2; CTAG; CTAG1; ESO1; LAGE2B	CTAG1B	4480209	Homo sapiens	RefSeq	ILMN_27139	NM_001327.1	NM_001327.1		1485	4503118	NM_001327.1	NP_001318.1	4480209	S	1	AGCAGGGGGCGCTGTGTGTACCGAGAATACGAGAATACCTCGTGGGCCCT	-	153500664-153500713	Xq28g				NY-ESO-1; LAGE-2; CTAG; CTAG1; ESO1; LAGE2B
ILMN_2100957	CTAG1B	CTAG1B	NO	NM_001327.1	CTAG1B		Homo sapiens cancer/testis antigen 1B (CTAG1B), mRNA.	NY-ESO-1; LAGE-2; CTAG; CTAG1; ESO1; LAGE2B	CTAG1B	6840050	Homo sapiens	RefSeq	ILMN_27139	NM_001327.1	NM_001327.1		1485	4503118	NM_001327.1	NP_001318.1	6840050	S	735	GAGGACGGCTTACATGTTTGTTTCTGTAGAAAATAAAACTGAGCTACGAA			Xq28g				NY-ESO-1; LAGE-2; CTAG; CTAG1; ESO1; LAGE2B
ILMN_1787578	CTAG2	CTAG2	NO	NM_020994.2	CTAG2	X	Homo sapiens cancer/testis antigen 2 (CTAG2), transcript variant 2, mRNA.	MGC3803; MGC138724; LAGE-2b; LAGE-1; ESO2; CAMEL	CTAG2	6450414	Homo sapiens	RefSeq	ILMN_21515	NM_020994.2	NM_020994.2		30848	50428919	NM_020994.2	NP_066274.1	6450414	I	525	GCCTCCCCGGAGGGGCAGAAAGCTAGAGATCTCAGAACACCCAAACACAA	-	153880653-153880702	Xq28g	The part of a cell or its extracellular environment in which a gene product is located. A gene product may be located in one or more parts of a cell and its location may be as specific as a particular macromolecular complex, that is, a stable, persistent association of macromolecules that function together [goid 5575] [evidence ND ]; A structure comprised of a core structure (in most organisms, a…	Any process specifically pertinent to the functioning of integrated living units: cells, tissues, organs, and organisms. A process is a collection of molecular events with a defined beginning and end [goid 8150] [evidence ND ]	Elemental activities, such as catalysis or binding, describing the actions of a gene product at the molecular level. A given gene product may exhibit one or more molecular functions [goid 3674] [evidence ND ]	MGC3803; MGC138724; LAGE-2b; LAGE-1; ESO2; CAMEL
ILMN_2336585	CTAG2	CTAG2	NO	NM_020994.2	CTAG2	X	Homo sapiens cancer/testis antigen 2 (CTAG2), transcript variant 2, mRNA.	MGC3803; MGC138724; LAGE-2b; LAGE-1; ESO2; CAMEL	CTAG2	4250148	Homo sapiens	RefSeq	ILMN_21515	NM_020994.2	NM_020994.2		30848	50428919	NM_020994.2	NP_066274.1	4250148	A	318	CAGTTGCACATCACGATGCCTTTCTCGTCGCCCATGGAAGCGGAGCTGGT	-	153880860-153880905:153881521-153881524	Xq28g	The part of a cell or its extracellular environment in which a gene product is located. A gene product may be located in one or more parts of a cell and its location may be as specific as a particular macromolecular complex, that is, a stable, persistent association of macromolecules that function together [goid 5575] [evidence ND ]; A structure comprised of a core structure (in most organisms, a…	Any process specifically pertinent to the functioning of integrated living units: cells, tissues, organs, and organisms. A process is a collection of molecular events with a defined beginning and end [goid 8150] [evidence ND ]	Elemental activities, such as catalysis or binding, describing the actions of a gene product at the molecular level. A given gene product may exhibit one or more molecular functions [goid 3674] [evidence ND ]	MGC3803; MGC138724; LAGE-2b; LAGE-1; ESO2; CAMEL
ILMN_1742587	CTAGE1	CTAGE1	NO	NM_172241.1	CTAGE1	18	Homo sapiens cutaneous T-cell lymphoma-associated antigen 1 (CTAGE1), transcript variant 1, mRNA.	CTAGE-2; CTAGE-1	CTAGE1	5090427	Homo sapiens	RefSeq	ILMN_138801	NM_172241.1	NM_172241.1		64693	26665878	NM_172241.1	NP_758441.1	5090427	I	2335	GCCCCCACATTCTGAAGGTAGAATGAGTTTCCATCAGGGTTGAGCCCGAC	-	18249490-18249506:18249507-18249539	18q11.2a	The part of a cell or its extracellular environment in which a gene product is located. A gene product may be located in one or more parts of a cell and its location may be as specific as a particular macromolecular complex, that is, a stable, persistent association of macromolecules that function together [goid 5575] [evidence ND ]; Double layer of lipid molecules that encloses all cells, and, i…	Any process specifically pertinent to the functioning of integrated living units: cells, tissues, organs, and organisms. A process is a collection of molecular events with a defined beginning and end [goid 8150] [evidence ND ]; Any process specifically pertinent to the functioning of integrated living units: cells, tissues, organs, and organisms. A process is a collection of molecular events with…		CTAGE-2; CTAGE-1
ILMN_1802029	CTAGE1	CTAGE1	NO	NM_022663.1	CTAGE1	18	Homo sapiens cutaneous T-cell lymphoma-associated antigen 1 (CTAGE1), transcript variant 1, mRNA.	CTAGE-2; CTAGE-1	CTAGE1	2710504	Homo sapiens	RefSeq	ILMN_42133	NM_172241.2	NM_172241.2		64693	90819228	NM_172241.2	NP_758441.2	2710504	A	4099	GGTATTGTCATCTCTTTGTGTCTACTTTGCCACCTTTCCCCAGAATAGGC	-	19993730-19993779	18q11.2a	The part of a cell or its extracellular environment in which a gene product is located. A gene product may be located in one or more parts of a cell and its location may be as specific as a particular macromolecular complex, that is, a stable, persistent association of macromolecules that function together [goid 5575] [evidence ND ]; Double layer of lipid molecules that encloses all cells, and, i…	Any process specifically pertinent to the functioning of integrated living units: cells, tissues, organs, and organisms. A process is a collection of molecular events with a defined beginning and end [goid 8150] [evidence ND ]; Any process specifically pertinent to the functioning of integrated living units: cells, tissues, organs, and organisms. A process is a collection of molecular events with…		CTAGE-2; CTAGE-1
ILMN_1745395	CTCFL	CTCFL	NO	NM_080618.2	CTCFL	20	Homo sapiens CCCTC-binding factor (zinc finger protein)-like (CTCFL), mRNA.	BORIS; MGC163358; dJ579F20.2; CTCF-T	CTCFL	620041	Homo sapiens	RefSeq	ILMN_18321	NM_080618.2	NM_080618.2		140690	29570784	NM_080618.2	NP_542185.2	620041	S	3007	GCCAGTTGACAAGATTTTTCCACCCTCGAGCAGCGTGAGAGATGCCTCTT	-	56072623-56072672	20q13.31a	The living contents of a cell; the matter contained within (but not including) the plasma membrane, usually taken to exclude large vacuoles and masses of secretory or ingested material. In eukaryotes it includes the nucleus and cytoplasm [goid 5622] [evidence IEA]		Interacting selectively with any nucleic acid [goid 3676] [evidence IEA]; Interacting selectively with zinc (Zn) ions [goid 8270] [evidence IEA]	BORIS; MGC163358; dJ579F20.2; CTCF-T
ILMN_2197693	CTNNA2	CTNNA2	NO	NM_004389.2	CTNNA2	2	Homo sapiens catenin (cadherin-associated protein), alpha 2 (CTNNA2), mRNA.	DKFZp686H02198; CAPR; CAP-R; CTNR	CTNNA2	4610692	Homo sapiens	RefSeq	ILMN_9271	NM_004389.2	NM_004389.2		1496	55770845	NM_004389.2	NP_004380.2	4610692	S	3588	TGAGACAATTAAAATCCTTCTGGGGGCACTGGAAGCACAATACGGTGACC	+	80729162-80729211	2p12e-p12d	All of the contents of a cell excluding the plasma membrane and nucleus, but including other subcellular structures [goid 5737] [evidence IEA]; The membrane surrounding a cell that separates the cell from its external environment. It consists of a phospholipid bilayer and associated proteins [goid 5886] [evidence IEA]; An adherens junction which connects two cells to each other [goid 5913] [evide…	The attachment of a cell, either to another cell or to an underlying substrate such as the extracellular matrix, via cell adhesion molecules [goid 7155] [evidence NAS]; The process by which the anatomical structures of brain are generated and organized. Morphogenesis pertains to the creation of form. The brain is one of the two components of the central nervous system and is the center of thought…	The action of a molecule that contributes to the structural integrity of a cytoskeletal structure [goid 5200] [pmid 8432524] [evidence NAS]; Interacting selectively with any protein or protein complex (a complex of two or more proteins that may include other nonprotein molecules) [goid 5515] [evidence IEA]; Interacting selectively with cadherin, a type I membrane protein involved in cell adhesion…	DKFZp686H02198; CAPR; CAP-R; CTNR
ILMN_1786328	DCAF12	WDR40A	YES	NM_015397.1	WDR40A	9	Homo sapiens WD repeat domain 40A (WDR40A), mRNA.	MGC1058; DKFZP434O125; DKFZp434O125; TCC52; KIAA1892	WDR40A	3290091	Homo sapiens	RefSeq	ILMN_29238	NM_015397.1	NM_015397.1		25853	22218618	NM_015397.1	NP_056212.1	3290091	S	3267	GACAGCAAGTCCACCCTAACTTGTTACACAGCACATACCACAGGTTCTGG	-	34076700-34076749	9p13.3d				MGC1058; DKFZP434O125; DKFZp434O125; TCC52; KIAA1892
ILMN_1813893	DDX43	DDX43	NO	NM_018665.1	DDX43	6	Homo sapiens DEAD (Asp-Glu-Ala-Asp) box polypeptide 43 (DDX43), mRNA.	DKFZp434H2114; HAGE	DDX43	4640735	Homo sapiens	RefSeq	ILMN_10035	NM_018665.1	NM_018665.1		55510	10346128	NM_018665.1	NP_061135.1	4640735	S	1886	GGGCGCACGGGAAGAGCAGGGAGGACTGGTGTTTCCATTACAACTTTGAC	+	74181113-74181130:74181941-74181972	6q13c	The living contents of a cell; the matter contained within (but not including) the plasma membrane, usually taken to exclude large vacuoles and masses of secretory or ingested material. In eukaryotes it includes the nucleus and cytoplasm [goid 5622] [pmid 11256614] [evidence IDA]		Interacting selectively with a nucleotide, any compound consisting of a nucleoside that is esterified with (ortho)phosphate or an oligophosphate at any hydroxyl group on the ribose or deoxyribose moiety [goid 166] [evidence IEA]; Interacting selectively with an RNA molecule or a portion thereof [goid 3723] [pmid 10919659] [evidence TAS]; Catalysis of the reaction: ATP + H2O = ADP + phosphate, dri…	DKFZp434H2114; HAGE
ILMN_1805344	DDX5	DDX5	NO	NM_004396.2	DDX5	17	Homo sapiens DEAD (Asp-Glu-Ala-Asp) box polypeptide 5 (DDX5), mRNA.	HUMP68; DKFZp686J01190; p68; HLR1; G17P1	DDX5	7610138	Homo sapiens	RefSeq	ILMN_20253	NM_004396.2	NM_004396.2		1655	13514826	NM_004396.2	NP_004387.1	7610138	S	1943	GGCATATGCATATCCTGCTACTGCAGCTGCACCTATGATTGGTTATCCAA	-	59926525-59926574	17q24.1a	A membrane-bounded organelle of eukaryotic cells in which chromosomes are housed and replicated. In most cells, the nucleus contains all of the cell's chromosomes except the organellar chromosomes, and is the site of RNA synthesis and processing. In some species, or in specialized cell types, RNA metabolism or DNA replication may be absent [goid 5634] [pmid 2451786] [evidence NAS]; A ribonucleopr…	Any process involved in the conversion of a primary mRNA transcript into one or more mature mRNA(s) prior to translation into polypeptide [goid 6397] [evidence IEA]; The process of removing sections of the primary RNA transcript to remove sequences not present in the mature form of the RNA and joining the remaining sections to form the mature form of the RNA [goid 8380] [evidence IEA]; The proces…	Interacting selectively with a nucleotide, any compound consisting of a nucleoside that is esterified with (ortho)phosphate or an oligophosphate at any hydroxyl group on the ribose or deoxyribose moiety [goid 166] [evidence IEA]; The function that links a sequence-specific transcription factor to the core RNA polymerase II complex but does not bind DNA itself [goid 3712] [evidence IEA]; Interacti…	HUMP68; DKFZp686J01190; p68; HLR1; G17P1
ILMN_1754163	DDX53	DDX53	NO	NM_182699.2	DDX53	X	Homo sapiens DEAD (Asp-Glu-Ala-Asp) box polypeptide 53 (DDX53), mRNA.	CAGE	DDX53	1450367	Homo sapiens	RefSeq	ILMN_9714	NM_182699.2	NM_182699.2		168400	55749864	NM_182699.2	NP_874358.2	1450367	S	1917	AGAGGCACAGAGAAACACGATCAAGAAAACCTGGACAAAGACGCAAGGAG	+	22929924-22929973	Xp22.11b	A membrane-bounded organelle of eukaryotic cells in which chromosomes are housed and replicated. In most cells, the nucleus contains all of the cell's chromosomes except the organellar chromosomes, and is the site of RNA synthesis and processing. In some species, or in specialized cell types, RNA metabolism or DNA replication may be absent [goid 5634] [evidence IEA]		Interacting selectively with a nucleotide, any compound consisting of a nucleoside that is esterified with (ortho)phosphate or an oligophosphate at any hydroxyl group on the ribose or deoxyribose moiety [goid 166] [evidence IEA]; Interacting selectively with an RNA molecule or a portion thereof [goid 3723] [evidence IEA]; Interacting selectively with ATP, adenosine 5'-triphosphate, a universally …	CAGE
ILMN_1721132	DKKL1	DKKL1	NO	NM_014419.3	DKKL1	19	Homo sapiens dickkopf-like 1 (soggy) (DKKL1), mRNA.	SGY; SGY-1; SGY1	DKKL1	7150215	Homo sapiens	RefSeq	ILMN_26421	NM_014419.3	NM_014419.3		27120	42734442	NM_014419.3	NP_055234.1	7150215	S	899	AAGACCCACTTACTGTACATCCTCAGGCCCTCTCGGCAGCTGTAGGGGTG	+	49878241-49878285:49878286-49878290	19q13.33a-q13.33b	The space external to the outermost structure of a cell. For cells without external protective or external encapsulating structures this refers to space outside of the plasma membrane. This term covers the host cell environment outside an intracellular parasite [goid 5576] [evidence IEA]; That part of a multicellular organism outside the cells proper, usually taken to be outside the plasma membra…	The process by which anatomical structures are generated and organized. Morphogenesis pertains to the creation of form [goid 9653] [pmid 10570958] [evidence TAS]	Mediates the transfer of a signal from the outside to the inside of a cell by means other than the introduction of the signal molecule itself into the cell [goid 4871] [pmid 10570958] [evidence TAS]	SGY; SGY-1; SGY1
ILMN_2209221	DMRT1	DMRT1	NO	NM_021951.2	DMRT1	9	Homo sapiens doublesex and mab-3 related transcription factor 1 (DMRT1), mRNA.	DMT1	DMRT1	5570703	Homo sapiens	RefSeq	ILMN_184096	NM_021951.2	NM_021951.2		1761	62241025	NM_021951.2	NP_068770.2	5570703	S	1917	AAAGTGACCTTAGTGATGCAGAGTTCCTGAGTGGTGTTTGTAGAATGAGT	+	894170-894195:906763-906786	9p24.3b	A membrane-bounded organelle of eukaryotic cells in which chromosomes are housed and replicated. In most cells, the nucleus contains all of the cell's chromosomes except the organellar chromosomes, and is the site of RNA synthesis and processing. In some species, or in specialized cell types, RNA metabolism or DNA replication may be absent [goid 5634] [evidence IEA]; A membrane-bounded organelle …	The synthesis of either RNA on a template of DNA or DNA on a template of RNA [goid 6350] [evidence IEA]; Any process that modulates the frequency, rate or extent of DNA-dependent transcription [goid 6355] [evidence IEA]; The biological process whose specific outcome is the progression of a multicellular organism over time from an initial condition (e.g. a zygote or a young adult) to a later condi…	The function of binding to a specific DNA sequence in order to modulate transcription. The transcription factor may or may not also interact selectively with a protein or macromolecular complex [goid 3700] [pmid 10332030] [evidence TAS]; Interacting selectively with zinc (Zn) ions [goid 8270] [evidence IEA]; Interacting selectively with any metal ion [goid 46872] [evidence IEA]; The function of b…	DMT1
ILMN_1768845	DNAJB8	DNAJB8	NO	NM_153330.2	DNAJB8	3	Homo sapiens DnaJ (Hsp40) homolog, subfamily B, member 8 (DNAJB8), mRNA.	MGC33884	DNAJB8	3800598	Homo sapiens	RefSeq	ILMN_987	NM_153330.2	NM_153330.2		165721	46094077	NM_153330.2	NP_699161.1	3800598	S	2400	GTGCATGGGGCAGCAAACACGTGGGGCCGCAGACATAGCCTGATGGTTAA	-	129663990-129664039	3q21.3c			Interacting selectvely with a heat shock protein, any protein synthesized or activated in response to heat shock [goid 31072] [evidence IEA]	MGC33884
ILMN_1780790	DPPA2	DPPA2	NO	NM_138815.2	DPPA2	3	Homo sapiens developmental pluripotency associated 2 (DPPA2), mRNA.	PESCRG1	DPPA2	6660743	Homo sapiens	RefSeq	ILMN_13691	NM_138815.2	NM_138815.2		151871	31982875	NM_138815.2	NP_620170.2	6660743	S	999	GCCTACCACTCACAGGAGGATGATTTCTCTCTTCTTGTTACCTGCCTGCA	-	110506066-110506115	3q13.13b	A membrane-bounded organelle of eukaryotic cells in which chromosomes are housed and replicated. In most cells, the nucleus contains all of the cell's chromosomes except the organellar chromosomes, and is the site of RNA synthesis and processing. In some species, or in specialized cell types, RNA metabolism or DNA replication may be absent [goid 5634] [evidence IEA]		Interacting selectively with any nucleic acid [goid 3676] [evidence IEA]	PESCRG1
ILMN_1698117	DSCR8	DSCR8	NO	NM_032589.2	DSCR8	21	Homo sapiens Down syndrome critical region gene 8 (DSCR8), transcript variant 1, mRNA.	MTAG2; C21orf65; MMA-1	DSCR8	1340328	Homo sapiens	RefSeq	ILMN_22375	NM_032589.2	NM_032589.2		84677	44680115	NM_032589.2	NP_115978.1	1340328	I	251	CACGGATCACTGCAGCCTCCACCTCCCAGTTCAAGAAATTCTCATGTCTC	+	38448418-38448467	21q22.13b	The part of a cell or its extracellular environment in which a gene product is located. A gene product may be located in one or more parts of a cell and its location may be as specific as a particular macromolecular complex, that is, a stable, persistent association of macromolecules that function together [goid 5575] [evidence ND ]	Any process specifically pertinent to the functioning of integrated living units: cells, tissues, organs, and organisms. A process is a collection of molecular events with a defined beginning and end [goid 8150] [evidence ND ]	Elemental activities, such as catalysis or binding, describing the actions of a gene product at the molecular level. A given gene product may exhibit one or more molecular functions [goid 3674] [evidence ND ]	MTAG2; C21orf65; MMA-1
ILMN_1758066	DSCR8	DSCR8	NO	NM_203429.1	DSCR8	21	Homo sapiens Down syndrome critical region gene 8 (DSCR8), transcript variant 3, mRNA.	MTAG2; C21orf65; MMA-1	DSCR8	4280504	Homo sapiens	RefSeq	ILMN_22589	NM_203429.1	NM_203429.1		84677	44680118	NM_203429.1	NP_982253.1	4280504	I	360	GAAGGCTGGCTCATACATTTTCCCAGACAGGAATTTGGCTGCCAACAGGG	+	38416506-38416555	21q22.13b	The part of a cell or its extracellular environment in which a gene product is located. A gene product may be located in one or more parts of a cell and its location may be as specific as a particular macromolecular complex, that is, a stable, persistent association of macromolecules that function together [goid 5575] [evidence ND ]	Any process specifically pertinent to the functioning of integrated living units: cells, tissues, organs, and organisms. A process is a collection of molecular events with a defined beginning and end [goid 8150] [evidence ND ]	Elemental activities, such as catalysis or binding, describing the actions of a gene product at the molecular level. A given gene product may exhibit one or more molecular functions [goid 3674] [evidence ND ]	MTAG2; C21orf65; MMA-1
ILMN_1763901	DSCR8	DSCR8	NO	NM_032589.2	DSCR8	21	Homo sapiens Down syndrome critical region gene 8 (DSCR8), transcript variant 2, mRNA.	MTAG2; C21orf65; MMA-1	DSCR8	4280132	Homo sapiens	RefSeq	ILMN_22481	NM_203428.1	NM_203428.1		84677	44680116	NM_203428.1	NP_982252.1	4280132	A	33	TCCCACTTGGCAGGGGCCGTCTTGTCCACTCGTTTCTGTAAACATGGGTG	+	38415469-38415518	21q22.13b	The part of a cell or its extracellular environment in which a gene product is located. A gene product may be located in one or more parts of a cell and its location may be as specific as a particular macromolecular complex, that is, a stable, persistent association of macromolecules that function together [goid 5575] [evidence ND ]	Any process specifically pertinent to the functioning of integrated living units: cells, tissues, organs, and organisms. A process is a collection of molecular events with a defined beginning and end [goid 8150] [evidence ND ]	Elemental activities, such as catalysis or binding, describing the actions of a gene product at the molecular level. A given gene product may exhibit one or more molecular functions [goid 3674] [evidence ND ]	MTAG2; C21orf65; MMA-1
ILMN_1737965	ELOVL4	ELOVL4	NO	NM_022726.2	ELOVL4	6	Homo sapiens elongation of very long chain fatty acids (FEN1/Elo2, SUR4/Elo3, yeast)-like 4 (ELOVL4), mRNA.	ADMD; STGD3; STGD2	ELOVL4	4760056	Homo sapiens	RefSeq	ILMN_162533	NM_022726.2	NM_022726.2		6785	21362099	NM_022726.2	NP_073563.1	4760056	S	2888	CTGTACTGGTTCCCAAGAGCTATTCATTCCCTGCTACCTGATTTCAGCAC	-	80681277-80681326	6q14.1c-q14.1d	The part of a cell or its extracellular environment in which a gene product is located. A gene product may be located in one or more parts of a cell and its location may be as specific as a particular macromolecular complex, that is, a stable, persistent association of macromolecules that function together [goid 5575] [evidence ND ]; The irregular network of unit membranes, visible only by electr…	The chemical reactions and pathways resulting in the formation of a fatty acid, any of the aliphatic monocarboxylic acids that can be liberated by hydrolysis from naturally occurring fats and oils. Fatty acids are predominantly straight-chain acids of 4 to 24 carbon atoms, which may be saturated or unsaturated; branched fatty acids and hydroxy fatty acids also occur, and very long chain acids of …	A G-protein coupled receptor that responds to incidental electromagnetic radiation, particularly visible light [goid 8020] [pmid 11138005] [evidence NAS]	ADMD; STGD3; STGD2
ILMN_1706538	EPPIN	SPINLW1	YES	NM_020398.2	SPINLW1	20	Homo sapiens serine peptidase inhibitor-like, with Kunitz and WAP domains 1 (eppin) (SPINLW1), transcript variant 2, mRNA.	EPPIN; dJ461P17.2; EPPIN2; EPPIN3; WAP7; WFDC7; EPPIN1	SPINLW1	4670300	Homo sapiens	RefSeq	ILMN_164084	NM_181502.1	NM_181502.1		57119	31563527	NM_181502.1	NP_852479.1	4670300	A	1519	GGGGAGTGAGATGAGTAATTCAGGGAAGAGAAGGGAAGAGAGAAGAGTCT	-	44170132-44170181	20q13.12b	The space external to the outermost structure of a cell. For cells without external protective or external encapsulating structures this refers to space outside of the plasma membrane. This term covers the host cell environment outside an intracellular parasite [goid 5576] [evidence IEA]; The space external to the outermost structure of a cell. For cells without external protective or external en…		Stops, prevents or reduces the activity of serine-type endopeptidases, enzymes that catalyze the hydrolysis of nonterminal peptide bonds in a polypeptide chain; a serine residue (and a histidine residue) are at the active center of the enzyme [goid 4867] [evidence IEA]; Stops, prevents or reduces the activity of a protease, any enzyme catalyzes the hydrolysis peptide bonds [goid 30414] [evidence …	EPPIN; dJ461P17.2; EPPIN2; EPPIN3; WAP7; WFDC7; EPPIN1
ILMN_1794266	EPPIN	SPINLW1	YES	NM_181502.1	SPINLW1	20	Homo sapiens serine peptidase inhibitor-like, with Kunitz and WAP domains 1 (eppin) (SPINLW1), transcript variant 2, mRNA.	EPPIN; dJ461P17.2; EPPIN2; EPPIN3; WAP7; WFDC7; EPPIN1	SPINLW1	4230465	Homo sapiens	RefSeq	ILMN_13635	NM_181502.1	NM_181502.1		57119	31563527	NM_181502.1	NP_852479.1	4230465	I	470	CCCTGAGGAAAAGAACTCCTGGGGGCAAGCAAACTGAAAGCAAACTTCCC	-	44174497-44174546	20q13.12b	The space external to the outermost structure of a cell. For cells without external protective or external encapsulating structures this refers to space outside of the plasma membrane. This term covers the host cell environment outside an intracellular parasite [goid 5576] [evidence IEA]; The space external to the outermost structure of a cell. For cells without external protective or external en…		Stops, prevents or reduces the activity of serine-type endopeptidases, enzymes that catalyze the hydrolysis of nonterminal peptide bonds in a polypeptide chain; a serine residue (and a histidine residue) are at the active center of the enzyme [goid 4867] [evidence IEA]; Stops, prevents or reduces the activity of a protease, any enzyme catalyzes the hydrolysis peptide bonds [goid 30414] [evidence …	EPPIN; dJ461P17.2; EPPIN2; EPPIN3; WAP7; WFDC7; EPPIN1
ILMN_1798753	EPPIN	SPINLW1	YES	NM_020398.2	SPINLW1	20	Homo sapiens serine peptidase inhibitor-like, with Kunitz and WAP domains 1 (eppin) (SPINLW1), transcript variant 1, mRNA.	EPPIN; dJ461P17.2; EPPIN2; EPPIN3; WAP7; WFDC7; EPPIN1	SPINLW1	3290112	Homo sapiens	RefSeq	ILMN_9321	NM_020398.2	NM_020398.2		57119	31563529	NM_020398.2	NP_065131.1	3290112	I	50	TTTGAGCCTCCTGGTGCTATTCGTCCTCTTAGCGAATGTCCAGGGACCTG	-	44175929-44175978	20q13.12b	The space external to the outermost structure of a cell. For cells without external protective or external encapsulating structures this refers to space outside of the plasma membrane. This term covers the host cell environment outside an intracellular parasite [goid 5576] [evidence IEA]; The space external to the outermost structure of a cell. For cells without external protective or external en…		Stops, prevents or reduces the activity of serine-type endopeptidases, enzymes that catalyze the hydrolysis of nonterminal peptide bonds in a polypeptide chain; a serine residue (and a histidine residue) are at the active center of the enzyme [goid 4867] [evidence IEA]; Stops, prevents or reduces the activity of a protease, any enzyme catalyzes the hydrolysis peptide bonds [goid 30414] [evidence …	EPPIN; dJ461P17.2; EPPIN2; EPPIN3; WAP7; WFDC7; EPPIN1
ILMN_2356378	EPPIN	SPINLW1	YES	NM_020398.2	SPINLW1	20	Homo sapiens serine peptidase inhibitor-like, with Kunitz and WAP domains 1 (eppin) (SPINLW1), transcript variant 1, mRNA.	EPPIN; dJ461P17.2; EPPIN2; EPPIN3; WAP7; WFDC7; EPPIN1	SPINLW1	5390731	Homo sapiens	RefSeq	ILMN_9321	NM_020398.2	NM_020398.2		57119	31563529	NM_020398.2	NP_065131.1	5390731	A	1757	CCCAACAGTGTAAAAGCATTCATGTTTCTCCACAGCTTTACCAGCATCTG	-	44169410-44169459	20q13.12b	The space external to the outermost structure of a cell. For cells without external protective or external encapsulating structures this refers to space outside of the plasma membrane. This term covers the host cell environment outside an intracellular parasite [goid 5576] [evidence IEA]; The space external to the outermost structure of a cell. For cells without external protective or external en…		Stops, prevents or reduces the activity of serine-type endopeptidases, enzymes that catalyze the hydrolysis of nonterminal peptide bonds in a polypeptide chain; a serine residue (and a histidine residue) are at the active center of the enzyme [goid 4867] [evidence IEA]; Stops, prevents or reduces the activity of a protease, any enzyme catalyzes the hydrolysis peptide bonds [goid 30414] [evidence …	EPPIN; dJ461P17.2; EPPIN2; EPPIN3; WAP7; WFDC7; EPPIN1
ILMN_1781742	FAM133A	FAM133A	NO	NM_173698.1	FAM133A	X	Homo sapiens family with sequence similarity 133, member A (FAM133A), mRNA.	RP1-32F7.2; FLJ37659	FAM133A	2370646	Homo sapiens	RefSeq	ILMN_176150	NM_173698.1	NM_173698.1		286499	27734774	NM_173698.1	NP_775969.1	2370646	S	3030	CCAAATGGCATACTTACAAGACGGATGCAACCTGGGTCCTTAGGTCGCTG	+	92853791-92853840	Xq21.32a				RP1-32F7.2; FLJ37659
ILMN_2207726	FAM46D	FAM46D	NO	NM_152630.2	FAM46D	X	Homo sapiens family with sequence similarity 46, member D (FAM46D), mRNA.	MGC26999	FAM46D	1820113	Homo sapiens	RefSeq	ILMN_25352	NM_152630.2	NM_152630.2		169966	34303945	NM_152630.2	NP_689843.1	1820113	S	2399	GCCTTTACCAAAGATCATTTTCTAACATGCCACTCAAGTGCCTCTTCGTG	+	79586854-79586903	Xq21.1c				MGC26999
ILMN_1806914	FATE1	FATE1	NO	NM_033085.2	FATE1	X	Homo sapiens fetal and adult testis expressed 1 (FATE1), mRNA.	FATE	FATE1	450392	Homo sapiens	RefSeq	ILMN_24613	NM_033085.2	NM_033085.2		89885	41350196	NM_033085.2	NP_149076.1	450392	S	940	TCAGCGGCCCTTCTGTTCCATCCTCTGTGGGCAGGGGTGTGGCTTTGTTT	+	150642191-150642240	Xq28d	The irregular network of unit membranes, visible only by electron microscopy, that occurs in the cytoplasm of many eukaryotic cells. The membranes form a complex meshwork of tubular channels, which are often expanded into slitlike cavities called cisternae. The ER takes two forms, rough (or granular), with ribosomes adhering to the outer surface, and smooth (with no ribosomes attached) [goid 5783…			FATE
ILMN_1814890	FBXO39	FBXO39	NO	NM_153230.1	FBXO39	17	Homo sapiens F-box protein 39 (FBXO39), mRNA.	MGC35179; Fbx39	FBXO39	5870128	Homo sapiens	RefSeq	ILMN_24151	NM_153230.1	NM_153230.1		162517	23397499	NM_153230.1	NP_694962.1	5870128	S	1551	TTGTCAGCTCCATGACAACATGACCAGCTCAGCAAAGGCTGAGACTGCCC	+	6631593-6631642	17p13.2a		The chemical reactions and pathways resulting in the breakdown of a protein or peptide by hydrolysis of its peptide bonds, initiated by the covalent attachment of a ubiquitin moiety, or multiple ubiquitin moieties, to the protein [goid 6511] [evidence IEA]	Interacting selectively with any protein or protein complex (a complex of two or more proteins that may include other nonprotein molecules) [goid 5515] [evidence IEA]	MGC35179; Fbx39
ILMN_1657141	FMR1NB	FMR1NB	NO	NM_152578.1	FMR1NB	X	Homo sapiens fragile X mental retardation 1 neighbor (FMR1NB), mRNA.	FLJ25736; NY-SAR-35	FMR1NB	7040445	Homo sapiens	RefSeq	ILMN_9344	NM_152578.1	NM_152578.1		158521	22749198	NM_152578.1	NP_689791.1	7040445	S	665	GGTATGTCTGCCCATTTATTGCCGCTCTCTTTTCTGGAGGAGCGAACCGG	+	146897882-146897923:146914077-146914084	Xq27.3e-q28a	Double layer of lipid molecules that encloses all cells, and, in eukaryotes, many organelles; may be a single or double lipid bilayer; also includes associated proteins [goid 16020] [evidence IEA]; Penetrating at least one phospholipid bilayer of a membrane. May also refer to the state of being buried in the bilayer with no exposure outside the bilayer. When used to describe a protein, indicates …			FLJ25736; NY-SAR-35
ILMN_1716925	FSIP1	FSIP1	NO	NM_152597.3	FSIP1	15	Homo sapiens fibrous sheath interacting protein 1 (FSIP1), mRNA.	HSD10; FLJ35989	FSIP1	5220424	Homo sapiens	RefSeq	ILMN_18959	NM_152597.4	NM_152597.4		161835	116089283	NM_152597.4	NP_689810.3	5220424	S	2338	GGTGGTCACTGGGAATTTTTGCTGTGGCCCTGCTTTTCCTTCTTCCCACT	-	39892657-39892706	15q14d				HSD10; FLJ35989
ILMN_1735439	FTHL17	FTHL17	NO	NM_031894.1	FTHL17	X	Homo sapiens ferritin, heavy polypeptide-like 17 (FTHL17), mRNA.		FTHL17	60754	Homo sapiens	RefSeq	ILMN_27696	NM_031894.1	NM_031894.1		53940	13994243	NM_031894.1	NP_114100.1	60754	S	604	TGAGTACCTGTTCGACAAGCTCACCCTGGGCGGCCGCGTCAAAGAGACTT	-	31089517-31089518:31089519-31089566	Xp21.2a		The directed movement of iron (Fe) ions into, out of, within or between cells [goid 6826] [evidence IEA]; The regulation of the levels, transport, and metabolism of iron ions within a cell or between a cell and its external environment [goid 6879] [evidence IEA]	The selective, often stoichiometric, interaction of a molecule with one or more specific sites on another molecule [goid 5488] [evidence IEA]; Interacting selectively with ferric iron, Fe(III) [goid 8199] [evidence IEA]; Catalysis of an oxidation-reduction (redox) reaction, a reversible chemical reaction in which the oxidation state of an atom or atoms within a molecule is altered. One substrate …
ILMN_1757915	GAGE1	GAGE1	NO	NM_001468.1	GAGE1	X	Homo sapiens G antigen 1 (GAGE1), mRNA.	MGC33825	GAGE1	7200253	Homo sapiens	RefSeq	ILMN_138026	NM_001468.1	NM_001468.1		2543	4503876	NM_001468.1	NP_001459.1	7200253	I	589	TCTTCATTGAAGTTCTCCCAATAAAGCTTTACAGCCTTCTGCAAAGAAAA	+	49257609-49257658	Xp11.23b		A defense response that is mediated by cells [goid 6968] [pmid 7544395] [evidence TAS]		MGC33825
ILMN_1777424	GAGE1	GAGE1	NO	XM_937755.1	GAGE1	X	Homo sapiens G antigen 1 (GAGE1), transcript variant 1, mRNA.	MGC33825	GAGE1	450446	Homo sapiens	RefSeq	ILMN_42326	NM_001468.3	NM_001468.3		2543	98985823	NM_001468.3	NP_001459.2	450446	A	436	CGCCTGAAGAAGAGATGAGGTCTCACTATGTTGCCCAGACTGGGATTCTC	+	49255329-49255340:49256545-49256582	Xp11.23b		A defense response that is mediated by cells [goid 6968] [pmid 7544395] [evidence TAS]
ILMN_2288639	GAGE1	GAGE1	NO	NM_001468.3	GAGE1	X	Homo sapiens G antigen 1 (GAGE1), transcript variant 1, mRNA.	MGC33825	GAGE1	7330497	Homo sapiens	RefSeq	ILMN_42326	NM_001468.3	NM_001468.3		2543	98985823	NM_001468.3	NP_001459.2	7330497	I	520	CCCCACGGAAACCTTGAGTGACTGAAATATCAAATGGCAAGAGACCGTTT	+	49256617-49256633:49256634-49256666	Xp11.23b		A defense response that is mediated by cells [goid 6968] [pmid 7544395] [evidence TAS]		MGC33825
ILMN_2396551	GAGE1	GAGE1	NO	NM_001468.3	GAGE1	X	Homo sapiens G antigen 1 (GAGE1), transcript variant 1, mRNA.	MGC33825	GAGE1	4490070	Homo sapiens	RefSeq	ILMN_42326	NM_001468.3	NM_001468.3		2543	98985823	NM_001468.3	NP_001459.2	4490070	A	797	GCTGTGTGTAGAGGCATAATTCTCATGTATTGATTTTCTATCCAGCAACC	+	49257749-49257798	Xp11.23b		A defense response that is mediated by cells [goid 6968] [pmid 7544395] [evidence TAS]		MGC33825
ILMN_3239440	GAGE10	GAGE10	NO	NM_001098413.2	GAGE10	X	Homo sapiens G antigen 10 (GAGE10), mRNA.		GAGE10	5050424	Homo sapiens	RefSeq	ILMN_309052	NM_001098413.2	NM_001098413.2		643832	150010545	NM_001098413.2	NP_001091883.2	5050424	S	28	TGGAGAACGCCAGGGAGCTGTGAGGGTGTGTGGTCTCGTTCCTGTCGTCT	+	49047096-49047145	Xp11.23b
ILMN_3243856	GAGE12B	GAGE12B	NO	NM_001127345.1	GAGE12B	X	Homo sapiens G antigen 12B (GAGE12B), mRNA.		GAGE12B	460707	Homo sapiens	RefSeq	ILMN_365528	NM_001127345.1	NM_001127345.1		729428	188219777	NM_001127345.1	NP_001120817.1	460707	S	163	CGGCCCGAGCAGTTCAGTGATGAAGTGGAACCAGCAACACCTGAAGAAGG	+	49317128-49317130:49317596-49317642
ILMN_3243851	GAGE12C	GAGE12C	NO	NM_001098408.1	GAGE12C	X	Homo sapiens G antigen 12C (GAGE12C), mRNA.		GAGE12C	2000673	Homo sapiens	RefSeq	ILMN_308976	NM_001098408.1	NM_001098408.1		729422	148491100	NM_001098408.1	NP_001091878.1	2000673	S	340	ATAGCCAGGAACAGGGTCACCCACAGACTGGGTGTGAGTGTGAAGATGGT	+	49188389-49188438	Xp11.23b
ILMN_3236667	GAGE12D	GAGE12D	NO	NM_001127199.1	GAGE12D	X	Homo sapiens G antigen 12D (GAGE12D), mRNA.		GAGE12D	620278	Homo sapiens	RefSeq	ILMN_364021	NM_001127199.1	NM_001127199.1		100132399	187608822	NM_001127199.1	NP_001120671.1	620278	S	112	TTCATCTGTGTGAAATATGAGTTGGCGAGGAAGATCGACCTATTATTGGC	+	49306436-49306443:49307483-49307490:49307491-49307524	Xp11.23b
ILMN_3237846	GAGE12E	GAGE12E	NO	NM_001098418.1	GAGE12E	X	Homo sapiens G antigen 12E (GAGE12E), mRNA.		GAGE12E	5670743	Homo sapiens	RefSeq	ILMN_308768	NM_001098418.1	NM_001098418.1		729431	148529002	NM_001098418.1	NP_001091888.1	5670743	S	265	GTCAGGATCCTGCAGCTGCTCAGGAGGGAGAGGATGAGGGAGCATCTGCA	+	49204593-49204642	Xp11.23b
ILMN_3242920	GAGE12F	GAGE12F	NO	NM_001098405.1	GAGE12F	X	Homo sapiens G antigen 12F (GAGE12F), mRNA.		GAGE12F	6620326	Homo sapiens	RefSeq	ILMN_308240	NM_001098405.1	NM_001098405.1		100008586	148491077	NM_001098405.1	NP_001091875.1	6620326	S	2	TGAGTTGGCGAGGAAGATCGACCTATTATTGGCCTAGACCAAGGCGCTAT	+	49212425-49212474	Xp11.23b
ILMN_1664660	GAGE12G	GAGE12G	NO	NM_001472.1	GAGE12G	X	Homo sapiens G antigen 12G (GAGE12G), mRNA.	MGC132611; RP11-959H17.6	GAGE12G	3930500	Homo sapiens	RefSeq	ILMN_307319	NM_001098409.1	NM_001098409.1		645073	148491063	NM_001098409.1	NP_001091879.1	3930500	S	34	ACGCCAGGGAGCTGTGAGGCAGTGCTGTGTGGTTCCTGCCGTCCGGACTC	+	49221969-49222018	Xp11.23b				MGC96942; MGC96883; MGC96930
ILMN_3244090	GAGE12H	GAGE12H	NO	NM_001098410.1	GAGE12H	X	Homo sapiens G antigen 12H (GAGE12H), mRNA.	RP11-959H17.7	GAGE12H	3390039	Homo sapiens	RefSeq	ILMN_307320	NM_001098410.1	NM_001098410.1		729442	148491083	NM_001098410.1	NP_001091880.1	3390039	S	286	AGAAGGGAGAGGATGAGGGAGCATCTGCAGGTCAAGGGCCGAAGCCTGAA	+	49233285-49233320:49236143-49236156	Xp11.23b				RP11-959H17.7
ILMN_1691563	GAGE12I	GAGE12I	NO	XM_934178.1	GAGE12I	X	Homo sapiens G antigen 12I (GAGE12I), mRNA.	GAGE7B; CT4.7; AL4	GAGE12I	4900021	Homo sapiens	RefSeq	ILMN_4743	NM_001477.1	NM_001477.1		26748	4503888	NM_001477.1	NP_001468.1	4900021	A	392	AGCAATCACAGTGTTAAAAGAAGGCACGTTGAAATGATGCAGGCTGCTCC	+	49110777-49110793:49110794-49110826	Xp11.23b
ILMN_2233576	GAGE12I	GAGE12I	NO	NM_001477.1	GAGE12I	X	Homo sapiens G antigen 12I (GAGE12I), mRNA.	GAGE7B; CT4.7; AL4	GAGE12I	4830561	Homo sapiens	RefSeq	ILMN_4743	NM_001477.1	NM_001477.1		26748	4503888	NM_001477.1	NP_001468.1	4830561	S	1	TGGTTCCTGCCGTCCGGACTCTTTTTCCTCTACTGAGATTCATCTGTGTG	+	49103621-49103666:49104707-49104710	Xp11.23b				GAGE7B; CT4.7; AL4
ILMN_3243333	GAGE12J	GAGE12J	NO	NM_001098406.1	GAGE12J	X	Homo sapiens G antigen 12J (GAGE12J), mRNA.	GAGE11	GAGE12J	4590487	Homo sapiens	RefSeq	ILMN_308370	NM_001098406.1	NM_001098406.1		729396	148491061	NM_001098406.1	NP_001091876.1	4590487	S	24	CACGTGAAGAACGCCAGGGAGCTGTGAGGCAGTGCTGTGTGGTTCCTGCC	+	49065483-49065532	Xp11.23b				GAGE11
ILMN_3244168	GAGE2A	GAGE2A	NO	NM_001127212.1	GAGE2A	X	Homo sapiens G antigen 2A (GAGE2A), mRNA.		GAGE2A	5490647	Homo sapiens	RefSeq	ILMN_365584	NM_001127212.1	NM_001127212.1		729447	187761325	NM_001127212.1	NP_001120684.1	5490647	S	150	AGCCTCCTGAAATGATTGGGCCTATGCGGCCCGAGCAGTTCAGTGATGAA	+	49355306-49355334:49355800-49355820	Xp11.23b	The part of a cell or its extracellular environment in which a gene product is located. A gene product may be located in one or more parts of a cell and its location may be as specific as a particular macromolecular complex, that is, a stable, persistent association of macromolecules that function together [goid 5575] [evidence ND ]	Any process specifically pertinent to the functioning of integrated living units: cells, tissues, organs, and organisms. A process is a collection of molecular events with a defined beginning and end [goid 8150] [evidence ND ]	Elemental activities, such as catalysis or binding, describing the actions of a gene product at the molecular level. A given gene product may exhibit one or more molecular functions [goid 3674] [evidence ND ]
ILMN_1715638	GAGE4	GAGE4	NO	NM_001474.1	GAGE4	X	Homo sapiens G antigen 4 (GAGE4), mRNA.	GAGE5	GAGE4	50220	Homo sapiens	RefSeq	ILMN_9440	NM_001474.1	NM_001474.1		2576	4503882	NM_001474.1	NP_001465.1	50220	S	1	CGCCAGGGAGCTGTGAGGCAGTGCTGTGTGGTTCCTGCCGTCCGGACTCT	+	49103593-49103642					GAGE5
ILMN_2195385	GAGE4	GAGE4	NO	NM_001474.1	GAGE4	X	Homo sapiens G antigen 4 (GAGE4), mRNA.	GAGE5	GAGE4	1990519	Homo sapiens	RefSeq	ILMN_9440	NM_001474.1	NM_001474.1		2576	4503882	NM_001474.1	NP_001465.1	1990519	S	2	GCCAGGGAGCTGTGAGGCAGTGCTGTGTGGTTCCTGCCGTCCGGACTCTT	+	49103594-49103643					GAGE5
ILMN_1738450	GAGE5	GAGE5	NO	NM_012196.1	GAGE5	X	Homo sapiens G antigen 5 (GAGE5), mRNA.		GAGE5	1050373	Homo sapiens	RefSeq	ILMN_9557	NM_001475.1	NM_001475.1		2577	4503884	NM_001475.1	NP_001466.1	1050373	S	3	CTGTGAGGCAGTGCTGTGTGGTTCCTGCCGTCCGGACTCTTTTTCCTCTA	+	49103603-49103652
ILMN_1782705	GAGE5	GAGE5	NO	NM_001475.1	GAGE5	X	Homo sapiens G antigen 5 (GAGE5), mRNA.		GAGE5	6900328	Homo sapiens	RefSeq	ILMN_9557	NM_001475.1	NM_001475.1		2577	4503884	NM_001475.1	NP_001466.1	6900328	S	1	AGCTGTGAGGCAGTGCTGTGTGGTTCCTGCCGTCCGGACTCTTTTTCCTC	+	49103601-49103650
ILMN_2127767	GAGE5	GAGE5	NO	NM_001475.1	GAGE5	X	Homo sapiens G antigen 5 (GAGE5), mRNA.		GAGE5	4290324	Homo sapiens	RefSeq	ILMN_9557	NM_001475.1	NM_001475.1		2577	4503884	NM_001475.1	NP_001466.1	4290324	S	418	CACAGTGTTAAAAGAAGGCACGTTGAAATGATGCAGGCTGCTCCTATGTT	+	49110783-49110793:49110794-49110832
ILMN_1700918	GAGE6	GAGE6	NO	XM_930039.1	GAGE6	X	Homo sapiens G antigen 6 (GAGE6), mRNA.		GAGE6	1300692	Homo sapiens	RefSeq	ILMN_9693	NM_001476.1	NM_001476.1		2578	4503886	NM_001476.1	NP_001467.1	1300692	A	414	TGAAAAGCAATCACAGTGTTAAAAGAAGACACGTTGAAATGATGCAGGCT	+	49219640-49219661:49219662-49219689
ILMN_1764225	GAGE6	GAGE6	NO	XM_930018.1	GAGE6	X	Homo sapiens G antigen 6 (GAGE6), mRNA.		GAGE6	70075	Homo sapiens	RefSeq	ILMN_9693	NM_001476.1	NM_001476.1		2578	4503886	NM_001476.1	NP_001467.1	70075	A	413	GTGAAAAGCAATCACAGTGTTAAAAGAAGACACGTTGAAATGATGCAGGC	+	49219639-49219661:49219662-49219688
ILMN_1783832	GAGE6	GAGE6	NO	NM_001476.1	GAGE6	X	Homo sapiens G antigen 6 (GAGE6), mRNA.		GAGE6	7570189	Homo sapiens	RefSeq	ILMN_9693	NM_001476.1	NM_001476.1		2578	4503886	NM_001476.1	NP_001467.1	7570189	S	325	CCACAGACTGGGTGTGAGTGTGAAGATGGTCCTGATGGGCAGGAGGTGGA	+	49217080-49217129
ILMN_1770467	GAGE7	GAGE7	NO	NM_021123.1	GAGE7	X	Homo sapiens G antigen 7 (GAGE7), mRNA.	GAGE-7	GAGE7	3400477	Homo sapiens	RefSeq	ILMN_1409	NM_021123.2	NM_021123.2		2579	93352564	NM_021123.2	NP_066946.1	3400477	S	399	CAGTGTTAAAAGAAGGCACGTTGAAATGATGCAGGCTGCTCCTATTTTGG	+	49110785-49110793:49110794-49110834					GAGE-7
ILMN_2104486	GAGE8	GAGE8	NO	NM_012196.1	GAGE8	X	Homo sapiens G antigen 8 (GAGE8), mRNA.		GAGE8	1170601	Homo sapiens	RefSeq	ILMN_8002	NM_012196.1	NM_012196.1		100101629	7705378	NM_012196.1	NP_036328.1	1170601	S	51	CTGAGATTCATCTGTGTGAAATATGAGTTGGCGAGGAAGATCGACCTATC	+	49084601-49084614:49085655-49085662:49085663-49085690			A defense response that is mediated by cells [goid 6968] [pmid 10397259] [evidence TAS]	Interacting selectively with any protein or protein complex (a complex of two or more proteins that may include other nonprotein molecules) [goid 5515] [pmid 16189514] [evidence IPI]
ILMN_2137625	GPAT2	GPAT2	NO	NM_207328.2	GPAT2	2	Homo sapiens glycerol-3-phosphate acyltransferase 2, mitochondrial (GPAT2), nuclear gene encoding mitochondrial protein, mRNA.		GPAT2	50458	Homo sapiens	RefSeq	ILMN_28499	NM_207328.2	NM_207328.2		150763	116812613	NM_207328.2	NP_997211.2	50458	S	2357	CAGCTGCCCGATACTGAGTTGGGCTACACAGAGCAGCTGTTCCAGTTCCT	-	96688737-96688771:96688854-96688868	2q11.2a
ILMN_1786036	GPATCH2	GPATCH2	NO	NM_018040.1	GPATCH2	1	Homo sapiens G patch domain containing 2 (GPATCH2), mRNA.	FLJ10252; FLJ21048; GPATC2; RP11-361K17.1; MGC74998	GPATCH2	6480243	Homo sapiens	RefSeq	ILMN_816	NM_018040.2	NM_018040.2		55105	142353610	NM_018040.2	NP_060510.1	6480243	S	1995	CATGTATGTGTGCAGTGCTGCAATGCCCAGACAAACGTGAGCACACCCAC	-	217604125-217604174	1q41b	The living contents of a cell; the matter contained within (but not including) the plasma membrane, usually taken to exclude large vacuoles and masses of secretory or ingested material. In eukaryotes it includes the nucleus and cytoplasm [goid 5622] [evidence IEA]		Interacting selectively with any nucleic acid [goid 3676] [evidence IEA]	GPATC2; MGC74998; FLJ10252; FLJ21048; RP11-361K17.1
ILMN_1680094	HEMGN	HEMGN	NO	NM_018437.3	HEMGN	9	Homo sapiens hemogen (HEMGN), transcript variant 1, mRNA.	EDAG; EDAG-1	HEMGN	6100424	Homo sapiens	RefSeq	ILMN_9415	NM_018437.3	NM_018437.3		55363	37574621	NM_018437.3	NP_060907.2	6100424	A	891	GCTGATCTGGCAGGATGCTCTCTTCAAGCATATCCAAAACCAGATGTGCC	-	100692876-100692925	9q22.33b	A membrane-bounded organelle of eukaryotic cells in which chromosomes are housed and replicated. In most cells, the nucleus contains all of the cell's chromosomes except the organellar chromosomes, and is the site of RNA synthesis and processing. In some species, or in specialized cell types, RNA metabolism or DNA replication may be absent [goid 5634] [evidence IEA]; That part of the nuclear cont…	The biological process whose specific outcome is the progression of a multicellular organism over time from an initial condition (e.g. a zygote or a young adult) to a later condition (e.g. a multicellular animal or an aged adult) [goid 7275] [evidence IEA]; The process whereby relatively unspecialized cells, e.g. embryonic or regenerative cells, acquire specialized structural and/or functional fe…		EDAG-1; EDAG
ILMN_1689675	HEMGN	HEMGN	NO	NM_018437.3	HEMGN	9	Homo sapiens hemogen (HEMGN), transcript variant 1, mRNA.	EDAG; EDAG-1	HEMGN	6290377	Homo sapiens	RefSeq	ILMN_9415	NM_018437.3	NM_018437.3		55363	37574621	NM_018437.3	NP_060907.2	6290377	I	23	CAACCAGAAGTTATGAAGATAGGTACTGTGGGTGTTAGAAAGATTCACGG	-	100707062-100707111	9q22.33b	A membrane-bounded organelle of eukaryotic cells in which chromosomes are housed and replicated. In most cells, the nucleus contains all of the cell's chromosomes except the organellar chromosomes, and is the site of RNA synthesis and processing. In some species, or in specialized cell types, RNA metabolism or DNA replication may be absent [goid 5634] [evidence IEA]; That part of the nuclear cont…	The biological process whose specific outcome is the progression of a multicellular organism over time from an initial condition (e.g. a zygote or a young adult) to a later condition (e.g. a multicellular animal or an aged adult) [goid 7275] [evidence IEA]; The process whereby relatively unspecialized cells, e.g. embryonic or regenerative cells, acquire specialized structural and/or functional fe…		EDAG-1; EDAG
ILMN_2413537	HEMGN	HEMGN	NO	NM_197978.1	HEMGN	9	Homo sapiens hemogen (HEMGN), transcript variant 2, mRNA.	EDAG-1; EDAG	HEMGN	7320246	Homo sapiens	RefSeq	ILMN_10958	NM_197978.1	NM_197978.1		55363	37574617	NM_197978.1	NP_932095.1	7320246	A	790	CTGGCTCCTAAAATGTGCCAAGAAGCTGCTGTACCCAAAATCCTTCCTTG	-	100692945-100692994	9q22.33b	A membrane-bounded organelle of eukaryotic cells in which chromosomes are housed and replicated. In most cells, the nucleus contains all of the cell's chromosomes except the organellar chromosomes, and is the site of RNA synthesis and processing. In some species, or in specialized cell types, RNA metabolism or DNA replication may be absent [goid 5634] [evidence IEA]; That part of the nuclear cont…	The biological process whose specific outcome is the progression of a multicellular organism over time from an initial condition (e.g. a zygote or a young adult) to a later condition (e.g. a multicellular animal or an aged adult) [goid 7275] [evidence IEA]; The process whereby relatively unspecialized cells, e.g. embryonic or regenerative cells, acquire specialized structural and/or functional fe…		EDAG-1; EDAG
ILMN_1769849	HORMAD1	HORMAD1	NO	NM_032132.2	HORMAD1	1	Homo sapiens HORMA domain containing 1 (HORMAD1), mRNA.	RP11-363I22.1; DKFZP434A1315; NOHMA	HORMAD1	3460608	Homo sapiens	RefSeq	ILMN_25891	NM_032132.3	NM_032132.3		84072	142370270	NM_032132.3	NP_115508.2	3460608	S	1302	TGTTCTGCAGGCTTGCAGAGTTCTTCTCACCATTTAAACTGAAGGACCCT	-	150671069-150671118	1q21.2c	A membrane-bounded organelle of eukaryotic cells in which chromosomes are housed and replicated. In most cells, the nucleus contains all of the cell's chromosomes except the organellar chromosomes, and is the site of RNA synthesis and processing. In some species, or in specialized cell types, RNA metabolism or DNA replication may be absent [goid 5634] [pmid 11256614] [evidence IDA]	Progression through mitosis, the division of the eukaryotic cell nucleus to produce two daughter nuclei that, usually, contain the identical chromosome complement to their mother [goid 7067] [evidence IEA]; Progression through mitosis, the division of the eukaryotic cell nucleus to produce two daughter nuclei that, usually, contain the identical chromosome complement to their mother [goid 7067] […		RP11-363I22.1; DKFZP434A1315; NOHMA
ILMN_2215025	HORMAD1	HORMAD1	NO	NM_032132.2	HORMAD1	1	Homo sapiens HORMA domain containing 1 (HORMAD1), mRNA.	RP11-363I22.1; DKFZP434A1315; NOHMA	HORMAD1	3390154	Homo sapiens	RefSeq	ILMN_25891	NM_032132.2	NM_032132.2		84072	31542506	NM_032132.2	NP_115508.2	3390154	S	1423	GGCTGACTGTCATATTGTGGTCCTTAATCTTGAGATAAATCCAATAGAAC	-	148937572-148937621	1q21.2c	A membrane-bounded organelle of eukaryotic cells in which chromosomes are housed and replicated. In most cells, the nucleus contains all of the cell's chromosomes except the organellar chromosomes, and is the site of RNA synthesis and processing. In some species, or in specialized cell types, RNA metabolism or DNA replication may be absent [goid 5634] [pmid 11256614] [evidence IDA]	Progression through mitosis, the division of the eukaryotic cell nucleus to produce two daughter nuclei that, usually, contain the identical chromosome complement to their mother [goid 7067] [evidence IEA]; Progression through mitosis, the division of the eukaryotic cell nucleus to produce two daughter nuclei that, usually, contain the identical chromosome complement to their mother [goid 7067] […		RP11-363I22.1; DKFZP434A1315; NOHMA
ILMN_1679139	HORMAD2	HORMAD2	NO	NM_152510.1	HORMAD2	22	Homo sapiens HORMA domain containing 2 (HORMAD2), mRNA.	MGC26710	HORMAD2	6040161	Homo sapiens	RefSeq	ILMN_11349	NM_152510.2	NM_152510.2		150280	142376243	NM_152510.2	NP_689723.1	6040161	S	1505	ATTGTGGGACCAAAATGTGCCCTGCCTCAACTCTGGCCCCAGGCCCTGTT	+	28902672-28902721	22q12.2b		Progression through mitosis, the division of the eukaryotic cell nucleus to produce two daughter nuclei that, usually, contain the identical chromosome complement to their mother [goid 7067] [evidence IEA]		MGC26710
ILMN_1666596	HSPB9	HSPB9	NO	NM_033194.1	HSPB9	17	Homo sapiens heat shock protein, alpha-crystallin-related, B9 (HSPB9), mRNA.	FLJ27437	HSPB9	1190347	Homo sapiens	RefSeq	ILMN_18940	NM_033194.1	NM_033194.1		94086	15082237	NM_033194.1	NP_149971.1	1190347	S	135	GGACAATGACCATGCCAGAGACGGTTTCCAAATGAAGCTGGATGCCCACG	+	37528529-37528578	17q21.2b		A change in state or activity of a cell or an organism (in terms of movement, secretion, enzyme production, gene expression, etc.) as a result of a disturbance in organismal or cellular homeostasis, usually, but not necessarily, exogenous (e.g. temperature, humidity, ionizing radiation) [goid 6950] [evidence IEA]	Interacting selectively with any protein or protein complex (a complex of two or more proteins that may include other nonprotein molecules) [goid 5515] [pmid 15503857] [evidence IPI]	FLJ27437
ILMN_1672693	IGSF11	IGSF11	NO	NM_001015887.1	IGSF11	3	Homo sapiens immunoglobulin superfamily, member 11 (IGSF11), transcript variant 2, mRNA.	BT-IgSF; VSIG3; Igsf13; MGC35227; CXADRL1	IGSF11	1400482	Homo sapiens	RefSeq	ILMN_551	NM_001015887.1	NM_001015887.1		152404	62865875	NM_001015887.1	NP_001015887.1	1400482	I	239	GGCCCCGGGATGACTTCTCAGCGTTCCCCTCTGGCGCCTTTGCTGCTCCT	-	120236078-120236119:120236120-120236127	3q13.32b	The membrane surrounding a cell that separates the cell from its external environment. It consists of a phospholipid bilayer and associated proteins [goid 5886] [evidence IEA]; Penetrating at least one phospholipid bilayer of a membrane. May also refer to the state of being buried in the bilayer with no exposure outside the bilayer. When used to describe a protein, indicates that all or part of t…	Any process that modulates the frequency, rate or extent of cell growth [goid 1558] [evidence IEA]; The attachment of a cell, either to another cell or to an underlying substrate such as the extracellular matrix, via cell adhesion molecules [goid 7155] [evidence IEA]	Combining with an extracellular or intracellular messenger to initiate a change in cell activity [goid 4872] [evidence IEA]; Interacting selectively with any protein or protein complex (a complex of two or more proteins that may include other nonprotein molecules) [goid 5515] [evidence IEA]	VSIG3; Igsf13; MGC35227; BT-IgSF; CXADRL1
ILMN_1753502	IGSF11	IGSF11	NO	NM_001015887.1	IGSF11	3	Homo sapiens immunoglobulin superfamily, member 11 (IGSF11), transcript variant 2, mRNA.	BT-IgSF; VSIG3; Igsf13; MGC35227; CXADRL1	IGSF11	5270102	Homo sapiens	RefSeq	ILMN_551	NM_001015887.1	NM_001015887.1		152404	62865875	NM_001015887.1	NP_001015887.1	5270102	A	3055	CTCTTCTCCTGCAAGCGTAGTCTTCACAGGGAGTGGCTTCCTGACATTTT	-	120102495-120102544	3q13.32b	The membrane surrounding a cell that separates the cell from its external environment. It consists of a phospholipid bilayer and associated proteins [goid 5886] [evidence IEA]; Penetrating at least one phospholipid bilayer of a membrane. May also refer to the state of being buried in the bilayer with no exposure outside the bilayer. When used to describe a protein, indicates that all or part of t…	Any process that modulates the frequency, rate or extent of cell growth [goid 1558] [evidence IEA]; The attachment of a cell, either to another cell or to an underlying substrate such as the extracellular matrix, via cell adhesion molecules [goid 7155] [evidence IEA]	Combining with an extracellular or intracellular messenger to initiate a change in cell activity [goid 4872] [evidence IEA]; Interacting selectively with any protein or protein complex (a complex of two or more proteins that may include other nonprotein molecules) [goid 5515] [evidence IEA]	VSIG3; Igsf13; MGC35227; BT-IgSF; CXADRL1
ILMN_1781735	IGSF11	IGSF11	NO	NM_152538.2	IGSF11	3	Homo sapiens immunoglobulin superfamily, member 11 (IGSF11), transcript variant 1, mRNA.	VSIG3; Igsf13; MGC35227; BT-IgSF; CXADRL1	IGSF11	5890021	Homo sapiens	RefSeq	ILMN_169041	NM_152538.2	NM_152538.2		152404	62865873	NM_152538.2	NP_689751.2	5890021	I	86	GAAGGGGCGATTCTCAGGCTCTGGCAGTTACAGCTTCTCCTCACCCTGCC	-	120347453-120347502	3q13.32b	The membrane surrounding a cell that separates the cell from its external environment. It consists of a phospholipid bilayer and associated proteins [goid 5886] [evidence IEA]; Penetrating at least one phospholipid bilayer of a membrane. May also refer to the state of being buried in the bilayer with no exposure outside the bilayer. When used to describe a protein, indicates that all or part of t…	Any process that modulates the frequency, rate or extent of cell growth [goid 1558] [evidence IEA]; The attachment of a cell, either to another cell or to an underlying substrate such as the extracellular matrix, via cell adhesion molecules [goid 7155] [evidence IEA]	Combining with an extracellular or intracellular messenger to initiate a change in cell activity [goid 4872] [evidence IEA]; Interacting selectively with any protein or protein complex (a complex of two or more proteins that may include other nonprotein molecules) [goid 5515] [evidence IEA]	VSIG3; Igsf13; MGC35227; BT-IgSF; CXADRL1
ILMN_1688722	IL13RA2	IL13RA2	NO	NM_000640.2	IL13RA2	X	Homo sapiens interleukin 13 receptor, alpha 2 (IL13RA2), mRNA.	IL-13R; CD213A2; IL13BP	IL13RA2	5420386	Homo sapiens	RefSeq	ILMN_20214	NM_000640.2	NM_000640.2		3598	26787976	NM_000640.2	NP_000631.1	5420386	S	1197	GTAACCGGTCTGCTTTTGCGTAAGCCAAACACCTACCCAAAAATGATTCC	-	114238664-114238669:114239760-114239803	Xq23c	That part of a multicellular organism outside the cells proper, usually taken to be outside the plasma membranes, and occupied by fluid [goid 5615] [pmid 9083087] [evidence TAS]; That fraction of cells, prepared by disruptive biochemical methods, that is soluble in water [goid 5625] [pmid 9083087] [evidence TAS]; Double layer of lipid molecules that encloses all cells, and, in eukaryotes, many or…		Combining with an extracellular or intracellular messenger to initiate a change in cell activity [goid 4872] [evidence IEA]; Combining with an interleukin to initiate a change in cell activity [goid 4907] [pmid 9725226] [evidence TAS]	IL-13R; CD213A2; IL13BP
ILMN_1733696	IMP3	IMP3	NO	NM_018285.2	IMP3	15	Homo sapiens IMP3, U3 small nucleolar ribonucleoprotein, homolog (yeast) (IMP3), mRNA.	BRMS2; MRPS4; C15orf12; FLJ10968; DKFZp586L0118	IMP3	2120544	Homo sapiens	RefSeq	ILMN_17898	NM_018285.2	NM_018285.2		55272	70908369	NM_018285.2	NP_060755.1	2120544	S	950	CTGGAAATCCCCACGCCCTGTTTCCCTTTATCGTCTTGTGGTTGGACTGG	-	73718651-73718700	15q24.2a	The living contents of a cell; the matter contained within (but not including) the plasma membrane, usually taken to exclude large vacuoles and masses of secretory or ingested material. In eukaryotes it includes the nucleus and cytoplasm [goid 5622] [evidence IEA]; A membrane-bounded organelle of eukaryotic cells in which chromosomes are housed and replicated. In most cells, the nucleus contains …	Any process involved in the conversion of a primary ribosomal RNA (rRNA) transcript into one or more mature rRNA molecules [goid 6364] [evidence IEA]	Interacting selectively with any protein or protein complex (a complex of two or more proteins that may include other nonprotein molecules) [goid 5515] [pmid 12655004] [evidence IPI]; Interacting selectively with ribosomal RNA [goid 19843] [evidence IEA]	BRMS2; MRPS4; C15orf12; FLJ10968; DKFZp586L0118
ILMN_1755727	KDM5B	KDM5B	NO	NM_006618.3	KDM5B	1	Homo sapiens lysine (K)-specific demethylase 5B (KDM5B), mRNA.	FLJ23670; FLJ12491; RBBP2H1A; KDM5B; PLU-1; FLJ12459; FLJ10538; FLJ16281; PUT1	KDM5B	5870482	Homo sapiens	RefSeq	ILMN_14812	NM_006618.3	NM_006618.3		10765	57242795	NM_006618.3	NP_006609.3	5870482	S	6147	AAGGGGTCTGTTCTGCAGTGGAGAAGACATTCTGGTGACCAGACTTTTGC	-	202696718-202696767	1q32.1d				FLJ23670; FLJ12491; RBBP2H1A; KDM5B; PLU-1; FLJ12459; FLJ10538; FLJ16281; PUT1
ILMN_1718206	KIAA0100	KIAA0100	NO	NM_014680.2	KIAA0100	17	Homo sapiens KIAA0100 (KIAA0100), mRNA.	MGC134981; DKFZp686M0843; BCOX; MGC111488	KIAA0100	5420204	Homo sapiens	RefSeq	ILMN_13719	NM_014680.2	NM_014680.2		9703	57242773	NM_014680.2	NP_055495.2	5420204	S	6999	ATCAGGCTCAGGGCCAGAGAGGCAACAAGAGAGCAAGACCCAGGGAATGG	-	26941840-26941889	17q11.2a	The space external to the outermost structure of a cell. For cells without external protective or external encapsulating structures this refers to space outside of the plasma membrane. This term covers the host cell environment outside an intracellular parasite [goid 5576] [evidence IEA]	A nearly universal metabolic pathway in which the acetyl group of acetyl coenzyme A is effectively oxidized to two CO2 and four pairs of electrons are transferred to coenzymes. The acetyl group combines with oxaloacetate to form citrate, which undergoes successive transformations to isocitrate, 2-oxoglutarate, succinyl-CoA, succinate, fumarate, malate, and oxaloacetate again, thus completing the …	Catalysis of the reaction: (S)-malate + acceptor = oxaloacetate + reduced acceptor [goid 8924] [evidence IEA]	MGC134981; DKFZp686M0843; BCOX; MGC111488
ILMN_1712452	KIF20B	KIF20B	NO	NM_016195.2	KIF20B	10	Homo sapiens kinesin family member 20B (KIF20B), mRNA.	DKFZp434P0810; DKFZp434B0435; MPP-1; KRMP1; MPP1	KIF20B	5900433	Homo sapiens	RefSeq	ILMN_12022	NM_016195.2	NM_016195.2		9585	46049113	NM_016195.2	NP_057279.2	5900433	S	6213	CCAGCCACTGGTAACCATTCTTCTACTCTGTATGCCCATGAGGTCAATTG	+	91492662-91492711	10q23.31c				DKFZp434P0810; DKFZp434B0435; MPP-1; KRMP1; MPP1
ILMN_1685916	KIF2C	KIF2C	NO	NM_006845.2	KIF2C	1	Homo sapiens kinesin family member 2C (KIF2C), mRNA.	KNSL6; MCAK	KIF2C	1470647	Homo sapiens	RefSeq	ILMN_25969	NM_006845.2	NM_006845.2		11004	13699832	NM_006845.2	NP_006836.1	1470647	S	2570	CTGGGGTTGTCCTGGCTCTGGGGAGAGAGACGGAGCCTTTAGTACAGCTA	+	45005776-45005825	1p34.1d	The region of a chromosome that includes the centromere and associated proteins. In monocentric chromosomes, this region corresponds to a single area of the chromosome, whereas in holocentric chromosomes, it is evenly distributed along the chromosome [goid 775] [evidence IEA]; A membrane-bounded organelle of eukaryotic cells in which chromosomes are housed and replicated. In most cells, the nucle…	Movement of organelles, other microtubules and other particles along microtubules, mediated by motor proteins [goid 7018] [evidence IEA]; Progression through mitosis, the division of the eukaryotic cell nucleus to produce two daughter nuclei that, usually, contain the identical chromosome complement to their mother [goid 7067] [pmid 9434124] [evidence TAS]; The multiplication or reproduction of c…	Interacting selectively with a nucleotide, any compound consisting of a nucleoside that is esterified with (ortho)phosphate or an oligophosphate at any hydroxyl group on the ribose or deoxyribose moiety [goid 166] [evidence IEA]; Catalysis of movement along a microtubule, coupled to the hydrolysis of a nucleoside triphosphate (usually ATP) [goid 3777] [pmid 9434124] [evidence TAS]; Interacting se…	KNSL6; MCAK
ILMN_1727748	LDHC	LDHC	NO	NM_002301.2	LDHC	11	Homo sapiens lactate dehydrogenase C (LDHC), transcript variant 1, mRNA.	MGC111073; LDHX; LDH3	LDHC	1990161	Homo sapiens	RefSeq	ILMN_15784	NM_002301.2	NM_002301.2		3948	9257229	NM_002301.2	NP_002292.1	1990161	I	107	GTGCTTTGTCCCTGTGGGTCATCTGTACTGATTGCGCCAAGAAAGCATTT	+	18390535-18390584	11p15.1c	All of the contents of a cell excluding the plasma membrane and nucleus, but including other subcellular structures [goid 5737] [evidence IEA]	[goid 19642] [evidence IEA]; The chemical reactions and pathways involving carbohydrates, any of a group of organic compounds based of the general formula Cx(H2O)y, as carried out by individual cells [goid 44262] [evidence IEA]; The process of removal or addition of one or more electrons with or without the concomitant removal or addition of a proton or protons [goid 55114] [evidence IEA]	Catalysis of the reaction: (S)-lactate + NAD+ = pyruvate + NADH + H+ [goid 4459] [pmid 2440048] [evidence TAS]; The selective, often stoichiometric, interaction of a molecule with one or more specific sites on another molecule [goid 5488] [evidence IEA]; Catalysis of an oxidation-reduction (redox) reaction, a reversible chemical reaction in which the oxidation state of an atom or atoms within a m…	MGC111073; LDHX; LDH3
ILMN_1745043	LDHC	LDHC	NO	NM_017448.1	LDHC	11	Homo sapiens lactate dehydrogenase C (LDHC), transcript variant 1, mRNA.	MGC111073; LDHX; LDH3	LDHC	6060470	Homo sapiens	RefSeq	ILMN_15784	NM_002301.2	NM_002301.2		3948	9257229	NM_002301.2	NP_002292.1	6060470	A	463	CAGCAGGAGGGAGAAACTCGCCTTGCCCTGGTCCAACGTAATGTGGCTAT	+	18407912-18407961	11p15.1c	All of the contents of a cell excluding the plasma membrane and nucleus, but including other subcellular structures [goid 5737] [evidence IEA]	[goid 19642] [evidence IEA]; The chemical reactions and pathways involving carbohydrates, any of a group of organic compounds based of the general formula Cx(H2O)y, as carried out by individual cells [goid 44262] [evidence IEA]; The process of removal or addition of one or more electrons with or without the concomitant removal or addition of a proton or protons [goid 55114] [evidence IEA]	Catalysis of the reaction: (S)-lactate + NAD+ = pyruvate + NADH + H+ [goid 4459] [pmid 2440048] [evidence TAS]; The selective, often stoichiometric, interaction of a molecule with one or more specific sites on another molecule [goid 5488] [evidence IEA]; Catalysis of an oxidation-reduction (redox) reaction, a reversible chemical reaction in which the oxidation state of an atom or atoms within a m…	MGC111073; LDHX; LDH3
ILMN_2326324	LDHC	LDHC	NO	NM_017448.1	LDHC	11	Homo sapiens lactate dehydrogenase C (LDHC), transcript variant 2, mRNA.	MGC111073; LDHX; LDH3	LDHC	110291	Homo sapiens	RefSeq	ILMN_12503	NM_017448.1	NM_017448.1		3948	9257227	NM_017448.1	NP_059144.1	110291	A	916	ACTCTTTCTCAGTATCCCTTGTGTCTTGGGGCGGAATGGTGTCTCAGATG	+	18429109-18429158	11p15.1c	All of the contents of a cell excluding the plasma membrane and nucleus, but including other subcellular structures [goid 5737] [evidence IEA]	[goid 19642] [evidence IEA]; The chemical reactions and pathways involving carbohydrates, any of a group of organic compounds based of the general formula Cx(H2O)y, as carried out by individual cells [goid 44262] [evidence IEA]; The process of removal or addition of one or more electrons with or without the concomitant removal or addition of a proton or protons [goid 55114] [evidence IEA]	Catalysis of the reaction: (S)-lactate + NAD+ = pyruvate + NADH + H+ [goid 4459] [pmid 2440048] [evidence TAS]; The selective, often stoichiometric, interaction of a molecule with one or more specific sites on another molecule [goid 5488] [evidence IEA]; Catalysis of an oxidation-reduction (redox) reaction, a reversible chemical reaction in which the oxidation state of an atom or atoms within a m…	MGC111073; LDHX; LDH3
ILMN_1785444	LEMD1	LEMD1	NO	NM_001001552.3	LEMD1	1	Homo sapiens LEM domain containing 1 (LEMD1), mRNA.	LEMP-1	LEMD1	3180615	Homo sapiens	RefSeq	ILMN_28526	NM_001001552.3	NM_001001552.3		93273	56676323	NM_001001552.3	NP_001001552.3	3180615	S	392	CGAGAGCTGGAGAGAAGAAGGTTTCCCAGTGGGCTTGAAGCTTGCTGTGC	-	205350850-205350862:205350863-205350899	1q32.1g	The double lipid bilayer enclosing the nucleus and separating its contents from the rest of the cytoplasm; includes the intermembrane space, a gap of width 20-40 nm (also called the perinuclear space) [goid 5635] [evidence IEA]; Double layer of lipid molecules that encloses all cells, and, in eukaryotes, many organelles; may be a single or double lipid bilayer; also includes associated proteins […			LEMP-1
ILMN_1805609	LIPI	LIPI	NO	NM_198996.2	LIPI	21	Homo sapiens lipase, member I (LIPI), mRNA.	LPDL; PRED5	LIPI	4010373	Homo sapiens	RefSeq	ILMN_9025	NM_198996.2	NM_198996.2		149998	61742625	NM_198996.2	NP_945347.1	4010373	S	1269	GCATTGGTTTGACATATTTCCAGAGCTCAAATCTGCAGTGTTCCACATGC	-	15516993-15517042	21q11.2c	The space external to the outermost structure of a cell. For cells without external protective or external encapsulating structures this refers to space outside of the plasma membrane. This term covers the host cell environment outside an intracellular parasite [goid 5576] [evidence IEA]	The chemical reactions and pathways resulting in the breakdown of lipids, compounds soluble in an organic solvent but not, or sparingly, in an aqueous solvent [goid 16042] [evidence IEA]	Catalysis of the hydrolysis of various bonds, e.g. C-O, C-N, C-C, phosphoric anhydride bonds, etc. Hydrolase is the systematic name for any enzyme of EC class 3 [goid 16787] [evidence IEA]	LPDL; PRED5
ILMN_1741507	LOC440934	LOC440934	NO	XM_938708.1	LOC440934		PREDICTED: Homo sapiens misc_RNA (LOC440934), miscRNA.		LOC440934	2690228	Homo sapiens	RefSeq	ILMN_166028	XR_015854.1	XR_015854.1		440934	113414275	XR_015854.1		2690228	A	2609	CCGCCGTAGTGGTTGACGAAGATGAGGCCGGTGAAGAGCAGCACCACCAT			2q36.1b
ILMN_1783905	LUZP4	LUZP4	NO	NM_016383.2	LUZP4	X	Homo sapiens leucine zipper protein 4 (LUZP4), mRNA.	CT28; HOM-TES-85; CT-8	LUZP4	4200630	Homo sapiens	RefSeq	ILMN_17575	NM_016383.3	NM_016383.3		51213	93102365	NM_016383.3	NP_057467.1	4200630	S	1276	TGTCCCCCTTGGACGTTCCAACTTGACTTAGTGTCCAGTGCCCCTTGGAC	+	114447925-114447974	Xq23d	A membrane-bounded organelle of eukaryotic cells in which chromosomes are housed and replicated. In most cells, the nucleus contains all of the cell's chromosomes except the organellar chromosomes, and is the site of RNA synthesis and processing. In some species, or in specialized cell types, RNA metabolism or DNA replication may be absent [goid 5634] [evidence IEA]			CT28; HOM-TES-85; CT-8
ILMN_1738646	LY6K	LY6K	NO	NM_017527.2	LY6K	8	Homo sapiens lymphocyte antigen 6 complex, locus K (LY6K), mRNA.	FLJ35226; HSJ001348	LY6K	1340390	Homo sapiens	RefSeq	ILMN_19724	NM_017527.2	NM_017527.2		54742	40068041	NM_017527.2	NP_059997.2	1340390	S	1414	GTGGAGGCGCTGTGGATGGCTGCTTTTCCTCAACCTTTCCTACCAGATTC	+	143782292-143782341	8q24.3e	The space external to the outermost structure of a cell. For cells without external protective or external encapsulating structures this refers to space outside of the plasma membrane. This term covers the host cell environment outside an intracellular parasite [goid 5576] [evidence IEA]; All of the contents of a cell excluding the plasma membrane and nucleus, but including other subcellular stru…			FLJ35226; HSJ001348
ILMN_1693119	LYPD6B	LYPD6B	NO	NM_177964.3	LYPD6B	2	Homo sapiens LY6/PLAUR domain containing 6B (LYPD6B), mRNA.		LYPD6B	3190121	Homo sapiens	RefSeq	ILMN_174241	NM_177964.3	NM_177964.3		130576	40255209	NM_177964.3	NP_808879.2	3190121	S	1254	CCTGGTCAAAGAGAGCTACGTTTGGGCAGTTCTGCAGAGAGGATCCTGGC	+	149779699-149779748	2q23.2a
ILMN_3245297	LYPD6B	LYPD6B	NO	NM_177964.3	LYPD6B	2	Homo sapiens LY6/PLAUR domain containing 6B (LYPD6B), mRNA.		LYPD6B	5810307	Homo sapiens	RefSeq	ILMN_174241	NM_177964.3	NM_177964.3		130576	40255209	NM_177964.3	NP_808879.2	5810307	S	1194	CCACAGGACTGAGGATGGGAATTTGGCAGGGCCTGAGAAGATGGTCTGAC	+	149779639-149779688	2q23.2a
ILMN_2211479	MAEL	MAEL	NO	NM_032858.1	MAEL	1	Homo sapiens maelstrom homolog (Drosophila) (MAEL), mRNA.	RP11-102C16.1; FLJ14904	MAEL	770224	Homo sapiens	RefSeq	ILMN_16726	NM_032858.1	NM_032858.1		84944	14249589	NM_032858.1	NP_116247.1	770224	S	1094	GGATGCAGGGCGTTACCAGAAGCTAAGGGTTGGGAGTTCAGGATTCTCTC	+	165253802-165253820:165256946-165256976	1q24.1c	A membrane-bounded organelle of eukaryotic cells in which chromosomes are housed and replicated. In most cells, the nucleus contains all of the cell's chromosomes except the organellar chromosomes, and is the site of RNA synthesis and processing. In some species, or in specialized cell types, RNA metabolism or DNA replication may be absent [goid 5634] [evidence IEA]; The sex chromosome present in…		Interacting selectively with DNA (deoxyribonucleic acid) [goid 3677] [evidence IEA]; Interacting selectively with any protein or protein complex (a complex of two or more proteins that may include other nonprotein molecules) [goid 5515] [evidence IEA]	RP11-102C16.1; FLJ14904
ILMN_2211483	MAEL	MAEL	NO	NM_032858.1	MAEL	1	Homo sapiens maelstrom homolog (Drosophila) (MAEL), mRNA.	RP11-102C16.1; FLJ14904	MAEL	1710411	Homo sapiens	RefSeq	ILMN_16726	NM_032858.1	NM_032858.1		84944	14249589	NM_032858.1	NP_116247.1	1710411	S	1303	CCAACTGTGACACTTCACTCTCACCTTACATGTCCCAAAAAGATGGATAC	+	165257643-165257692	1q24.1c	A membrane-bounded organelle of eukaryotic cells in which chromosomes are housed and replicated. In most cells, the nucleus contains all of the cell's chromosomes except the organellar chromosomes, and is the site of RNA synthesis and processing. In some species, or in specialized cell types, RNA metabolism or DNA replication may be absent [goid 5634] [evidence IEA]; The sex chromosome present in…		Interacting selectively with DNA (deoxyribonucleic acid) [goid 3677] [evidence IEA]; Interacting selectively with any protein or protein complex (a complex of two or more proteins that may include other nonprotein molecules) [goid 5515] [evidence IEA]	RP11-102C16.1; FLJ14904
ILMN_1722830	MAGEA1	MAGEA1	NO	NM_004988.3	MAGEA1	X	Homo sapiens melanoma antigen family A, 1 (directs expression of antigen MZ2-E) (MAGEA1), mRNA.	MGC9326; MAGE1	MAGEA1	6980088	Homo sapiens	RefSeq	ILMN_177427	NM_004988.4	NM_004988.4		4100	148276976	NM_004988.4	NP_004979.3	6980088	S	1193	GTGCACCTTCCAGGGCCGCGTCCAGCAGCTTCCCCTGCCTCGTGTGACAT	-	152481988-152482037	Xq28f	All of the contents of a cell excluding the plasma membrane and nucleus, but including other subcellular structures [goid 5737] [evidence IEA]; The membrane surrounding a cell that separates the cell from its external environment. It consists of a phospholipid bilayer and associated proteins [goid 5886] [pmid 1840703] [evidence TAS]			MGC9326; MAGE1
ILMN_2181593	MAGEA1	MAGEA1	NO	NM_004988.3	MAGEA1	X	Homo sapiens melanoma antigen family A, 1 (directs expression of antigen MZ2-E) (MAGEA1), mRNA.	MGC9326; MAGE1	MAGEA1	6370754	Homo sapiens	RefSeq	ILMN_177427	NM_004988.3	NM_004988.3		4100	29029615	NM_004988.3	NP_004979.2	6370754	S	1236	GCGGTCAGTGTTCTCAGTAGTAGGTTTCTGTTCTATTGGGTGACTTGGAG	-	152135106-152135155	Xq28f	All of the contents of a cell excluding the plasma membrane and nucleus, but including other subcellular structures [goid 5737] [evidence IEA]; The membrane surrounding a cell that separates the cell from its external environment. It consists of a phospholipid bilayer and associated proteins [goid 5886] [pmid 1840703] [evidence TAS]			MGC9326; MAGE1
ILMN_1708901	MAGEA10	MAGEA10	NO	NM_001011543.1	MAGEA10	X	Homo sapiens melanoma antigen family A, 10 (MAGEA10), transcript variant 1, mRNA.	MAGE10; MGC10599	MAGEA10	6760180	Homo sapiens	RefSeq	ILMN_179733	NM_001011543.1	NM_001011543.1		4109	58530862	NM_001011543.1	NP_001011543.1	6760180	I	212	TAAGGCAGTGTTTTCAGGTCACAGAGCAGAAAGGGCCCAGACAGTGCCAG	-	151304469-151304518	Xq28e				MAGE10; MGC10599
ILMN_1741430	MAGEA10	MAGEA10	NO	NM_001011543.1	MAGEA10	X	Homo sapiens melanoma antigen family A, 10 (MAGEA10), transcript variant 2, mRNA.	MAGE10; MGC10599	MAGEA10	2490541	Homo sapiens	RefSeq	ILMN_22178	NM_021048.3	NM_021048.3		4109	29029613	NM_021048.3	NP_066386.1	2490541	A	1374	GCCATGGCCAGTGCAAGTTCTAGCGCTACAGGTAGCTTCTCCTACCCTGA	-	151302986-151303035	Xq28e				MAGE10; MGC10599
ILMN_1686083	MAGEA11	MAGEA11	NO	NM_005366.4	MAGEA11	X	Homo sapiens melanoma antigen family A, 11 (MAGEA11), transcript variant 2, mRNA.	MAGE11; MAGEA-11; MGC10511; MAGE-11	MAGEA11	3140349	Homo sapiens	RefSeq	ILMN_17907	NM_001011544.1	NM_001011544.1		4110	61744472	NM_001011544.1	NP_001011544.1	3140349	A	1396	ATGAGATGCAACCAGGGCCAGCGGGCAGGGAAATGGGCCAATGCATGCTT	-	148797483-148797532	Xq28b	A membrane-bounded organelle of eukaryotic cells in which chromosomes are housed and replicated. In most cells, the nucleus contains all of the cell's chromosomes except the organellar chromosomes, and is the site of RNA synthesis and processing. In some species, or in specialized cell types, RNA metabolism or DNA replication may be absent [goid 5634] [evidence IEA]; All of the contents of a cell…		Interacting selectively with any protein or protein complex (a complex of two or more proteins that may include other nonprotein molecules) [goid 5515] [pmid 16189514] [evidence IPI]	MAGE11; MAGEA-11; MGC10511; MAGE-11
ILMN_2267131	MAGEA11	MAGEA11	NO	NM_001011544.1	MAGEA11	X	Homo sapiens melanoma antigen family A, 11 (MAGEA11), transcript variant 2, mRNA.	MAGE11; MAGEA-11; MGC10511; MAGE-11	MAGEA11	3140192	Homo sapiens	RefSeq	ILMN_17907	NM_001011544.1	NM_001011544.1		4110	61744472	NM_001011544.1	NP_001011544.1	3140192	I	124	GAGGTGGGTGCTATGCAAGTGGAGCTGGTGACTGATGGCTGACCATTGAT	-	148798755-148798804	Xq28b	A membrane-bounded organelle of eukaryotic cells in which chromosomes are housed and replicated. In most cells, the nucleus contains all of the cell's chromosomes except the organellar chromosomes, and is the site of RNA synthesis and processing. In some species, or in specialized cell types, RNA metabolism or DNA replication may be absent [goid 5634] [evidence IEA]; All of the contents of a cell…		Interacting selectively with any protein or protein complex (a complex of two or more proteins that may include other nonprotein molecules) [goid 5515] [pmid 16189514] [evidence IPI]	MAGE11; MAGEA-11; MGC10511; MAGE-11
ILMN_2267990	MAGEA11	MAGEA11	NO	NM_005366.4	MAGEA11	X	Homo sapiens melanoma antigen family A, 11 (MAGEA11), transcript variant 1, mRNA.	MAGE11; MAGEA-11; MGC10511; MAGE-11	MAGEA11	2710242	Homo sapiens	RefSeq	ILMN_17451	NM_005366.4	NM_005366.4		4110	65507077	NM_005366.4	NP_005357.2	2710242	I	72	CATGAGGAGGCAAGCCTTGGGAATCTGAGGGATGGAGACTCAGTTCCGCA	-	148798807-148798856	Xq28b	A membrane-bounded organelle of eukaryotic cells in which chromosomes are housed and replicated. In most cells, the nucleus contains all of the cell's chromosomes except the organellar chromosomes, and is the site of RNA synthesis and processing. In some species, or in specialized cell types, RNA metabolism or DNA replication may be absent [goid 5634] [evidence IEA]; All of the contents of a cell…		Interacting selectively with any protein or protein complex (a complex of two or more proteins that may include other nonprotein molecules) [goid 5515] [pmid 16189514] [evidence IPI]	MAGE11; MAGEA-11; MGC10511; MAGE-11
ILMN_2360047	MAGEA11	MAGEA11	NO	NM_005366.4	MAGEA11	X	Homo sapiens melanoma antigen family A, 11 (MAGEA11), transcript variant 1, mRNA.	MAGE11; MAGEA-11; MGC10511; MAGE-11	MAGEA11	1500452	Homo sapiens	RefSeq	ILMN_17451	NM_005366.4	NM_005366.4		4110	65507077	NM_005366.4	NP_005357.2	1500452	A	1113	CCTGAGCATTATGGGGGTGTATGCTGGAAGGGAGCACTTCCTCTTTGGGG	-	148797766-148797815	Xq28b	A membrane-bounded organelle of eukaryotic cells in which chromosomes are housed and replicated. In most cells, the nucleus contains all of the cell's chromosomes except the organellar chromosomes, and is the site of RNA synthesis and processing. In some species, or in specialized cell types, RNA metabolism or DNA replication may be absent [goid 5634] [evidence IEA]; All of the contents of a cell…		Interacting selectively with any protein or protein complex (a complex of two or more proteins that may include other nonprotein molecules) [goid 5515] [pmid 16189514] [evidence IPI]	MAGE11; MAGEA-11; MGC10511; MAGE-11
ILMN_1718107	MAGEA12	MAGEA12	NO	NM_005367.4	MAGEA12	X	Homo sapiens melanoma antigen family A, 12 (MAGEA12), mRNA.	MAGE12	MAGEA12	4830739	Homo sapiens	RefSeq	ILMN_24182	NM_005367.4	NM_005367.4		4111	58530872	NM_005367.4	NP_005358.2	4830739	S	353	CCCTCCCCACTACCATCAACTATACTCTCTGGAGTCAATCCGATGAGGGC	-	151651198-151651247	Xq28e	The part of a cell or its extracellular environment in which a gene product is located. A gene product may be located in one or more parts of a cell and its location may be as specific as a particular macromolecular complex, that is, a stable, persistent association of macromolecules that function together [goid 5575] [evidence ND ]	Any process specifically pertinent to the functioning of integrated living units: cells, tissues, organs, and organisms. A process is a collection of molecular events with a defined beginning and end [goid 8150] [evidence ND ]	Elemental activities, such as catalysis or binding, describing the actions of a gene product at the molecular level. A given gene product may exhibit one or more molecular functions [goid 3674] [evidence ND ]	MAGE12
ILMN_2231003	MAGEA12	MAGEA12	NO	NM_005367.4	MAGEA12	X	Homo sapiens melanoma antigen family A, 12 (MAGEA12), mRNA.	MAGE12	MAGEA12	6650463	Homo sapiens	RefSeq	ILMN_171727	NM_005367.4	NM_005367.4		4111	58530872	NM_005367.4	NP_005358.2	6650463	S	1179	GTGTGACATGAGGCCCATTCTTCACTCTTTGAAGAGAGCAGTCAGTATTG	-	151899716-151899765	Xq28e	The part of a cell or its extracellular environment in which a gene product is located. A gene product may be located in one or more parts of a cell and its location may be as specific as a particular macromolecular complex, that is, a stable, persistent association of macromolecules that function together [goid 5575] [evidence ND ]	Any process specifically pertinent to the functioning of integrated living units: cells, tissues, organs, and organisms. A process is a collection of molecular events with a defined beginning and end [goid 8150] [evidence ND ]	Elemental activities, such as catalysis or binding, describing the actions of a gene product at the molecular level. A given gene product may exhibit one or more molecular functions [goid 3674] [evidence ND ]	MAGE12
ILMN_1677269	MAGEA2	MAGEA2	NO	NM_175743.1	MAGEA2	X	Homo sapiens melanoma antigen family A, 2 (MAGEA2), transcript variant 3, mRNA.	MAGE2; MAGEA2A; MGC131923	MAGEA2	4860626	Homo sapiens	RefSeq	ILMN_30059	NM_175743.1	NM_175743.1		4101	29029619	NM_175743.1	NP_786885.1	4860626	I	256	TCAGGAGCTCCAGGAACCAGGCAGTGAGGCCTTGGTCTGAGTCAGTGTCC	-	151920293-151920342	Xq28e				MAGE2; MAGEA2A; MGC131923
ILMN_1684607	MAGEA2	MAGEA2	NO	XM_931803.1	MAGEA2	X	Homo sapiens melanoma antigen family A, 2 (MAGEA2), transcript variant 1, mRNA.	MAGE2; MAGEA2A; MGC131923	MAGEA2	5090100	Homo sapiens	RefSeq	ILMN_29458	NM_005361.2	NM_005361.2		4101	29029616	NM_005361.2	NP_005352.1	5090100	I	172	AGTCGCCACCACCTCACCCCGCCACCCCCCGCCGCTTTAACCGCAGGGAA	-	151922143-151922192	Xq28e
ILMN_2319919	MAGEA2	MAGEA2	NO	NM_005361.2	MAGEA2	X	Homo sapiens melanoma antigen family A, 2 (MAGEA2), transcript variant 1, mRNA.	MAGE2; MAGEA2A; MGC131923	MAGEA2	630386	Homo sapiens	RefSeq	ILMN_29458	NM_005361.2	NM_005361.2		4101	29029616	NM_005361.2	NP_005352.1	630386	A	233	CAGGGAGTTGATGACCTTGTTTTCAGAAGGTGACTCAGGTCAACACAGGG	-	151920983-151921032	Xq28e				MAGE2; MAGEA2A; MGC131923
ILMN_1715393	MAGEA2B	MAGEA2B	NO	NM_153488.3	MAGEA2B	X	Homo sapiens melanoma antigen family A, 2B (MAGEA2B), mRNA.	MAGE2; MGC16973; MAGEA2	MAGEA2B	990379	Homo sapiens	RefSeq	ILMN_9119	NM_153488.3	NM_153488.3		266740	34335237	NM_153488.3	NP_705692.1	990379	S	1571	ATGTTTTTGCTTCTTTGAGAATGCAAAAGAAATTAAATCTGAATAAAAAA	+	151637410-151637459	Xq28e				MAGE2; MGC16973; MAGEA2
ILMN_1652276	MAGEA3	MAGEA3	NO	NM_005362.3	MAGEA3	X	Homo sapiens melanoma antigen family A, 3 (MAGEA3), mRNA.	HYPD; HIP8; MAGEA6; MAGE3; MGC14613	MAGEA3	1990039	Homo sapiens	RefSeq	ILMN_161972	NM_005362.3	NM_005362.3		4102	29029622	NM_005362.3	NP_005353.1	1990039	S	1117	CCCTGCATGAGTGGGTTTTGAGAGAGGGGGAAGAGTGAGTCTGAGCACGA	-	151935209-151935221:151935222-151935258	Xq28e				HIP8; MAGE3; MGC14613; HYPD; MAGEA6
ILMN_2153572	MAGEA3	MAGEA3	NO	NM_005362.3	MAGEA3	X	Homo sapiens melanoma antigen family A, 3 (MAGEA3), mRNA.	HYPD; HIP8; MAGEA6; MAGE3; MGC14613	MAGEA3	2450259	Homo sapiens	RefSeq	ILMN_161972	NM_005362.3	NM_005362.3		4102	29029622	NM_005362.3	NP_005353.1	2450259	S	1677	TGAGAATGCAAGCGAAATTAAATCTGAATAAATAATTCTTCCTCTTCAAA	-	151688894-151688896:151934652-151934698	Xq28e				HIP8; MAGE3; MGC14613; HYPD; MAGEA6
ILMN_1687400	MAGEA4	MAGEA4	NO	NM_001011550.1	MAGEA4	X	Homo sapiens melanoma antigen family A, 4 (MAGEA4), transcript variant 3, mRNA.	MAGE4B; MAGE4A; MAGE4; MAGE-41; MGC21336; MAGE-X2	MAGEA4	4200619	Homo sapiens	RefSeq	ILMN_7064	NM_001011549.1	NM_001011549.1		4103	58530868	NM_001011549.1	NP_001011549.1	4200619	A	420	GCCTCTGCCTTACCCACTACCATCAGCTTCACTTGCTGGAGGCAACCCAA	+	150842997-150843046	Xq28d	The part of a cell or its extracellular environment in which a gene product is located. A gene product may be located in one or more parts of a cell and its location may be as specific as a particular macromolecular complex, that is, a stable, persistent association of macromolecules that function together [goid 5575] [evidence ND ]	Any process specifically pertinent to the functioning of integrated living units: cells, tissues, organs, and organisms. A process is a collection of molecular events with a defined beginning and end [goid 8150] [evidence ND ]	Elemental activities, such as catalysis or binding, describing the actions of a gene product at the molecular level. A given gene product may exhibit one or more molecular functions [goid 3674] [evidence ND ]; Interacting selectively with any protein or protein complex (a complex of two or more proteins that may include other nonprotein molecules) [goid 5515] [pmid 12525503] [evidence IPI]; Inter…	MAGE4B; MAGE4A; MAGE-41; MAGE-X2; MAGE4; MGC21336
ILMN_2361714	MAGEA4	MAGEA4	NO	NM_002362.4	MAGEA4	X	Homo sapiens melanoma antigen family A, 4 (MAGEA4), transcript variant 2, mRNA.	MAGE4B; MAGE4A; MAGE-41; MAGE-X2; MAGE4; MGC21336	MAGEA4	5910612	Homo sapiens	RefSeq	ILMN_14299	NM_002362.4	NM_002362.4		4103	58530864	NM_002362.4	NP_002353.3	5910612	A	1218	GCCAGTGCATCTAACAGCCCTGTGCAGCAGCTTCCCTTGCCTCGTGTAAC	+	150843789-150843838	Xq28d	The part of a cell or its extracellular environment in which a gene product is located. A gene product may be located in one or more parts of a cell and its location may be as specific as a particular macromolecular complex, that is, a stable, persistent association of macromolecules that function together [goid 5575] [evidence ND ]	Any process specifically pertinent to the functioning of integrated living units: cells, tissues, organs, and organisms. A process is a collection of molecular events with a defined beginning and end [goid 8150] [evidence ND ]	Elemental activities, such as catalysis or binding, describing the actions of a gene product at the molecular level. A given gene product may exhibit one or more molecular functions [goid 3674] [evidence ND ]; Interacting selectively with any protein or protein complex (a complex of two or more proteins that may include other nonprotein molecules) [goid 5515] [pmid 12525503] [evidence IPI]; Inter…	MAGE4B; MAGE4A; MAGE-41; MAGE-X2; MAGE4; MGC21336
ILMN_1750777	MAGEA5	MAGEA5	NO	NM_021049.3	MAGEA5	X	Homo sapiens melanoma antigen family A, 5 (MAGEA5), mRNA.	MAGE5; MGC129526; MAGEA4	MAGEA5	3940070	Homo sapiens	RefSeq	ILMN_163850	NM_021049.3	NM_021049.3		4104	58530874	NM_021049.3	NP_066387.1	3940070	S	1019	ACTGTGGGGTCCAAGGGCACTCGCTGCTTGAAAGTACTGGAGCACGTGGT	-	151283149-151283198	Xq28e	The part of a cell or its extracellular environment in which a gene product is located. A gene product may be located in one or more parts of a cell and its location may be as specific as a particular macromolecular complex, that is, a stable, persistent association of macromolecules that function together [goid 5575] [evidence ND ]	Any process specifically pertinent to the functioning of integrated living units: cells, tissues, organs, and organisms. A process is a collection of molecular events with a defined beginning and end [goid 8150] [evidence ND ]	Elemental activities, such as catalysis or binding, describing the actions of a gene product at the molecular level. A given gene product may exhibit one or more molecular functions [goid 3674] [evidence ND ]	MAGE5; MAGEA4; MGC129526
ILMN_1675651	MAGEA6	MAGEA6	NO	NM_175868.1	MAGEA6	X	Homo sapiens melanoma antigen family A, 6 (MAGEA6), transcript variant 2, mRNA.	MAGE3B; MAGE-3b; MGC52297; MAGE6	MAGEA6	4640414	Homo sapiens	RefSeq	ILMN_9280	NM_175868.1	NM_175868.1		4105	29029626	NM_175868.1	NP_787064.1	4640414	A	1166	TCCTGCATGAGTGGGCTTTGAGAGAGGGGGAAGAGTGAGTCTGAGCACGA	+	151620874-151620911:151620912-151620923	Xq28e	The part of a cell or its extracellular environment in which a gene product is located. A gene product may be located in one or more parts of a cell and its location may be as specific as a particular macromolecular complex, that is, a stable, persistent association of macromolecules that function together [goid 5575] [evidence ND ]	Any process specifically pertinent to the functioning of integrated living units: cells, tissues, organs, and organisms. A process is a collection of molecular events with a defined beginning and end [goid 8150] [evidence ND ]	Elemental activities, such as catalysis or binding, describing the actions of a gene product at the molecular level. A given gene product may exhibit one or more molecular functions [goid 3674] [evidence ND ]; Interacting selectively with any protein or protein complex (a complex of two or more proteins that may include other nonprotein molecules) [goid 5515] [pmid 17353931] [evidence IPI]	MAGE3B; MAGE-3b; MGC52297; MAGE6
ILMN_1685798	MAGEA6	MAGEA6	NO	NM_175743.1	MAGEA6	X	Homo sapiens melanoma antigen family A, 6 (MAGEA6), transcript variant 2, mRNA.	MAGE3B; MAGE-3b; MGC52297; MAGE6	MAGEA6	2600255	Homo sapiens	RefSeq	ILMN_9280	NM_175868.1	NM_175868.1		4105	29029626	NM_175868.1	NP_787064.1	2600255	A	306	TGAGGCCCGAGGAGAGGCCCTGGGCCTGGTGGGTGCGCAGGCTCCTGCTA	+	151620014-151620063	Xq28e	The part of a cell or its extracellular environment in which a gene product is located. A gene product may be located in one or more parts of a cell and its location may be as specific as a particular macromolecular complex, that is, a stable, persistent association of macromolecules that function together [goid 5575] [evidence ND ]	Any process specifically pertinent to the functioning of integrated living units: cells, tissues, organs, and organisms. A process is a collection of molecular events with a defined beginning and end [goid 8150] [evidence ND ]	Elemental activities, such as catalysis or binding, describing the actions of a gene product at the molecular level. A given gene product may exhibit one or more molecular functions [goid 3674] [evidence ND ]; Interacting selectively with any protein or protein complex (a complex of two or more proteins that may include other nonprotein molecules) [goid 5515] [pmid 17353931] [evidence IPI]	MAGE2; MAGEA2A; MGC131923
ILMN_2372681	MAGEA6	MAGEA6	NO	NM_175868.1	MAGEA6	X	Homo sapiens melanoma antigen family A, 6 (MAGEA6), transcript variant 2, mRNA.	MAGE3B; MAGE-3b; MGC52297; MAGE6	MAGEA6	5490367	Homo sapiens	RefSeq	ILMN_9280	NM_175868.1	NM_175868.1		4105	29029626	NM_175868.1	NP_787064.1	5490367	A	1196	AAGAGTGAGTCTGAGCACGAGTTGCAGCCAGGGCCAGTGGGAGGGGGTTT	+	151620904-151620911:151620912-151620953	Xq28e	The part of a cell or its extracellular environment in which a gene product is located. A gene product may be located in one or more parts of a cell and its location may be as specific as a particular macromolecular complex, that is, a stable, persistent association of macromolecules that function together [goid 5575] [evidence ND ]	Any process specifically pertinent to the functioning of integrated living units: cells, tissues, organs, and organisms. A process is a collection of molecular events with a defined beginning and end [goid 8150] [evidence ND ]	Elemental activities, such as catalysis or binding, describing the actions of a gene product at the molecular level. A given gene product may exhibit one or more molecular functions [goid 3674] [evidence ND ]; Interacting selectively with any protein or protein complex (a complex of two or more proteins that may include other nonprotein molecules) [goid 5515] [pmid 17353931] [evidence IPI]	MAGE3B; MAGE-3b; MGC52297; MAGE6
ILMN_2069912	MAGEA8	MAGEA8	NO	NM_005364.3	MAGEA8	X	Homo sapiens melanoma antigen family A, 8 (MAGEA8), mRNA.	MGC2182; MAGE8	MAGEA8	70470	Homo sapiens	RefSeq	ILMN_5472	NM_005364.3	NM_005364.3		4107	29029628	NM_005364.3	NP_005355.2	70470	S	1307	GTCACAGTTCTCAGTAGTGGGGAGCATGTTGGGTGTGAGGGAACACAGTG	+	148774796-148774845	Xq28b	The part of a cell or its extracellular environment in which a gene product is located. A gene product may be located in one or more parts of a cell and its location may be as specific as a particular macromolecular complex, that is, a stable, persistent association of macromolecules that function together [goid 5575] [evidence ND ]	Any process specifically pertinent to the functioning of integrated living units: cells, tissues, organs, and organisms. A process is a collection of molecular events with a defined beginning and end [goid 8150] [evidence ND ]	Elemental activities, such as catalysis or binding, describing the actions of a gene product at the molecular level. A given gene product may exhibit one or more molecular functions [goid 3674] [evidence ND ]	MGC2182; MAGE8
ILMN_2069915	MAGEA8	MAGEA8	NO	NM_005364.3	MAGEA8	X	Homo sapiens melanoma antigen family A, 8 (MAGEA8), mRNA.	MGC2182; MAGE8	MAGEA8	5700333	Homo sapiens	RefSeq	ILMN_5472	NM_005364.3	NM_005364.3		4107	29029628	NM_005364.3	NP_005355.2	5700333	S	1680	TGCCTTACCTGTACCTCTTAGTGTACCCTATGTACCTGAATTTGCTTGGC	+	148775169-148775218	Xq28b	The part of a cell or its extracellular environment in which a gene product is located. A gene product may be located in one or more parts of a cell and its location may be as specific as a particular macromolecular complex, that is, a stable, persistent association of macromolecules that function together [goid 5575] [evidence ND ]	Any process specifically pertinent to the functioning of integrated living units: cells, tissues, organs, and organisms. A process is a collection of molecular events with a defined beginning and end [goid 8150] [evidence ND ]	Elemental activities, such as catalysis or binding, describing the actions of a gene product at the molecular level. A given gene product may exhibit one or more molecular functions [goid 3674] [evidence ND ]	MGC2182; MAGE8
ILMN_1693102	MAGEA9	MAGEA9	NO	NM_005365.4	MAGEA9	X	Homo sapiens melanoma antigen family A, 9 (MAGEA9), mRNA.	MGC8421; MAGE9	MAGEA9	7200397	Homo sapiens	RefSeq	ILMN_25558	NM_005365.4	NM_005365.4		4108	34335238	NM_005365.4	NP_005356.1	7200397	S	1762	CTTGGCTTCTTTGAGCATGTAAGAGAAATAAAAATTGAAAGAATAAAAAA	+	148677161-148677206:148863600-148863603	Xq28b	The part of a cell or its extracellular environment in which a gene product is located. A gene product may be located in one or more parts of a cell and its location may be as specific as a particular macromolecular complex, that is, a stable, persistent association of macromolecules that function together [goid 5575] [evidence ND ]	Any process specifically pertinent to the functioning of integrated living units: cells, tissues, organs, and organisms. A process is a collection of molecular events with a defined beginning and end [goid 8150] [evidence ND ]	Elemental activities, such as catalysis or binding, describing the actions of a gene product at the molecular level. A given gene product may exhibit one or more molecular functions [goid 3674] [evidence ND ]	MGC8421; MAGE9
ILMN_1670255	MAGEA9B	MAGEA9B	NO	XM_926481.1	MAGEA9B	X	Homo sapiens melanoma antigen family A, 9B (MAGEA9B), mRNA.		MAGEA9B	4390253	Homo sapiens	RefSeq	ILMN_170350	NM_001080790.1	NM_001080790.1		728269	124248553	NM_001080790.1	NP_001074259.1	4390253	A	271	CCCTGACCAGAGTCATCATGTCTCTCGAGCAGAGGAGTCCGCACTGCAAG	-	148664802-148664835:148664836-148664851	Xq28b
ILMN_2075292	MAGEA9B	MAGEA9B	NO	NM_001080790.1	MAGEA9B	X	Homo sapiens melanoma antigen family A, 9B (MAGEA9B), mRNA.		MAGEA9B	1340131	Homo sapiens	RefSeq	ILMN_170350	NM_001080790.1	NM_001080790.1		728269	124248553	NM_001080790.1	NP_001074259.1	1340131	S	1322	TGGCTCTGTGTTTGAAGAGAGCAATCAGTGTTCTCAGTGGCAGTGGGTGG	-	148663751-148663800	Xq28b
ILMN_2297555	MAGEB1	MAGEB1	NO	NM_002363.3	MAGEB1	X	Homo sapiens melanoma antigen family B, 1 (MAGEB1), transcript variant 1, mRNA.	MAGEL1; MAGE-Xp; MGC9322; DAM10	MAGEB1	4570414	Homo sapiens	RefSeq	ILMN_26455	NM_002363.3	NM_002363.3		4112	29171706	NM_002363.3	NP_002354.2	4570414	I	187	CGAGCGAGCTTAAGGAGTGGGGTGCAGCGTCTGGTCAGCCGAGGGTGAAT	+	30175437-30175486	Xp21.2a	A membrane-bounded organelle of eukaryotic cells in which chromosomes are housed and replicated. In most cells, the nucleus contains all of the cell's chromosomes except the organellar chromosomes, and is the site of RNA synthesis and processing. In some species, or in specialized cell types, RNA metabolism or DNA replication may be absent [goid 5634] [pmid 18029348] [evidence IDA]; A small, dens…			MAGEL1; MAGE-Xp; MGC9322; DAM10
ILMN_2413231	MAGEB1	MAGEB1	NO	NM_002363.3	MAGEB1	X	Homo sapiens melanoma antigen family B, 1 (MAGEB1), transcript variant 1, mRNA.	MAGEL1; MAGE-Xp; MGC9322; DAM10	MAGEB1	1010524	Homo sapiens	RefSeq	ILMN_26455	NM_002363.3	NM_002363.3		4112	29171706	NM_002363.3	NP_002354.2	1010524	A	1323	CGTTCTAGAGCCCCATTCAGCAGGTCCTCCCACCCCATGTGAGAACTCAG	+	30179534-30179575:30179576-30179583	Xp21.2a	A membrane-bounded organelle of eukaryotic cells in which chromosomes are housed and replicated. In most cells, the nucleus contains all of the cell's chromosomes except the organellar chromosomes, and is the site of RNA synthesis and processing. In some species, or in specialized cell types, RNA metabolism or DNA replication may be absent [goid 5634] [pmid 18029348] [evidence IDA]; A small, dens…			MAGEL1; MAGE-Xp; MGC9322; DAM10
ILMN_2413236	MAGEB1	MAGEB1	NO	NM_002363.3	MAGEB1	X	Homo sapiens melanoma antigen family B, 1 (MAGEB1), transcript variant 1, mRNA.	MAGEL1; MAGE-Xp; MGC9322; DAM10	MAGEB1	2900326	Homo sapiens	RefSeq	ILMN_26455	NM_002363.3	NM_002363.3		4112	29171706	NM_002363.3	NP_002354.2	2900326	A	1001	GGGAGCCTATGATGGAGAGGAGCACTTAATCTATGGGGAACCCCGTAAGT	+	30179212-30179261	Xp21.2a	A membrane-bounded organelle of eukaryotic cells in which chromosomes are housed and replicated. In most cells, the nucleus contains all of the cell's chromosomes except the organellar chromosomes, and is the site of RNA synthesis and processing. In some species, or in specialized cell types, RNA metabolism or DNA replication may be absent [goid 5634] [pmid 18029348] [evidence IDA]; A small, dens…			MAGEL1; MAGE-Xp; MGC9322; DAM10
ILMN_1703034	MAGEB10	MAGEB10	NO	NM_182506.2	MAGEB10	X	Homo sapiens melanoma antigen family B, 10 (MAGEB10), mRNA.	FLJ32965; MGC120394	MAGEB10	150746	Homo sapiens	RefSeq	ILMN_629	NM_182506.2	NM_182506.2		139422	73623440	NM_182506.2	NP_872312.2	150746	S	1311	GCACATTCTGAGCTGTGGGAGGTCAGGGTGGGACTGGAGACAACACAGTG	+	27750428-27750477	Xp21.3b				FLJ32965; MGC120394
ILMN_1710847	MAGEB16	MAGEB16	NO	XM_498354.2	MAGEB16	X	Homo sapiens melanoma antigen family B, 16 (MAGEB16), mRNA.		MAGEB16	2710156	Homo sapiens	RefSeq	ILMN_307603	NM_001099921.1	NM_001099921.1		139604	153791872	NM_001099921.1	NP_001093391.1	2710156	S	280	ATGTCTCAGGATCAGGAGAGTCCACGATGCACACATGATCAGCACCTTCA	+	35730235-35730284	Xp21.1b
ILMN_1718448	MAGEB18	MAGEB18	NO	NM_173699.1	MAGEB18	X	Homo sapiens melanoma antigen family B, 18 (MAGEB18), mRNA.	MGC33889	MAGEB18	7610630	Homo sapiens	RefSeq	ILMN_182504	NM_173699.2	NM_173699.2		286514	141801944	NM_173699.2	NP_775970.1	7610630	S	1314	CAACATTCTAAGTAGTGAATGGCCAGAGTGCGTCTGGAGGGAACACGGCA	+	26068276-26068325	Xp21.3c			Interacting selectively with any protein or protein complex (a complex of two or more proteins that may include other nonprotein molecules) [goid 5515] [pmid 16189514] [evidence IPI]	MGC33889
ILMN_1688335	MAGEB2	MAGEB2	NO	NM_002364.3	MAGEB2	X	Homo sapiens melanoma antigen family B, 2 (MAGEB2), mRNA.	MAGE-XP-2; MGC26438; DAM6	MAGEB2	380129	Homo sapiens	RefSeq	ILMN_162748	NM_002364.3	NM_002364.3		4113	34335239	NM_002364.3	NP_002355.1	380129	S	1108	CCAAAGCCAAGTTTACCTGCTGTTCTCACCCCCAATGAGGTCTTAGGCAG	+	30147628-30147677	Xp21.2a			Interacting selectively with any protein or protein complex (a complex of two or more proteins that may include other nonprotein molecules) [goid 5515] [pmid 17353931] [evidence IPI]	MAGE-XP-2; MGC26438; DAM6
ILMN_2078430	MAGEB2	MAGEB2	NO	NM_002364.3	MAGEB2	X	Homo sapiens melanoma antigen family B, 2 (MAGEB2), mRNA.	MAGE-XP-2; MGC26438; DAM6	MAGEB2	5340121	Homo sapiens	RefSeq	ILMN_162748	NM_002364.3	NM_002364.3		4113	34335239	NM_002364.3	NP_002355.1	5340121	S	1452	AGACCCCATAGTGAAATATTTGGGATCAGAAGCCAGAGGGGTAAAAGTGG	+	30147972-30148021	Xp21.2a			Interacting selectively with any protein or protein complex (a complex of two or more proteins that may include other nonprotein molecules) [goid 5515] [pmid 17353931] [evidence IPI]	MAGE-XP-2; MGC26438; DAM6
ILMN_1785114	MAGEB3	MAGEB3	NO	NM_002365.3	MAGEB3	X	Homo sapiens melanoma antigen family B, 3 (MAGEB3), mRNA.		MAGEB3	110129	Homo sapiens	RefSeq	ILMN_183925	NM_002365.3	NM_002365.3		4114	45446750	NM_002365.3	NP_002356.2	110129	S	1816	GGGCAGTCACTGTTCCAAGGAGTGAAGGACTGGGTGTTACTGGAGGGAAC	+	30165041-30165090	Xp21.2a
ILMN_1808418	MAGEB4	MAGEB4	NO	NM_002367.2	MAGEB4	X	Homo sapiens melanoma antigen family B, 4 (MAGEB4), mRNA.	MGC33144	MAGEB4	6620195	Homo sapiens	RefSeq	ILMN_2182	NM_002367.2	NM_002367.2		4115	29171715	NM_002367.2	NP_002358.1	6620195	S	2078	GTGAAAAGGAAATTACCTTGCAATAAAGTTGGTGGGACCAGGAAGTAGAG	+	30172167-30172216	Xp21.2a				MGC33144
ILMN_1675015	MAGEB5	MAGEB5	NO	XM_293407.4	MAGEB5		PREDICTED: Homo sapiens melanoma antigen family B, 5 (MAGEB5), mRNA.		MAGEB5	4050170	Homo sapiens	RefSeq	ILMN_35737	XM_942614.2	XM_942614.2		347541	113430336	XM_942614.2	XP_947707.2	4050170	A	1047	CTGCAGTGGCCAAGACTGTCTCAGGGCGAAGTTCAGCAGCTTCTCTCAAC			Xp21.3c	The part of a cell or its extracellular environment in which a gene product is located. A gene product may be located in one or more parts of a cell and its location may be as specific as a particular macromolecular complex, that is, a stable, persistent association of macromolecules that function together [goid 5575] [evidence ND ]	Any process specifically pertinent to the functioning of integrated living units: cells, tissues, organs, and organisms. A process is a collection of molecular events with a defined beginning and end [goid 8150] [evidence ND ]	Elemental activities, such as catalysis or binding, describing the actions of a gene product at the molecular level. A given gene product may exhibit one or more molecular functions [goid 3674] [evidence ND ]
ILMN_1685572	MAGEB6	MAGEB6	NO	NM_173523.2	MAGEB6	X	Homo sapiens melanoma antigen family B, 6 (MAGEB6), mRNA.	FLJ40242; MAGE-B6; MAGEB6A	MAGEB6	730037	Homo sapiens	RefSeq	ILMN_11130	NM_173523.2	NM_173523.2		158809	29337289	NM_173523.2	NP_775794.2	730037	S	1354	CATTGAGACTGAGAGCTTAAGGCAGGGCTGGCACTATTTCCTTGGCCAGG	+	26123089-26123108:26123109-26123138	Xp21.3c	The part of a cell or its extracellular environment in which a gene product is located. A gene product may be located in one or more parts of a cell and its location may be as specific as a particular macromolecular complex, that is, a stable, persistent association of macromolecules that function together [goid 5575] [evidence ND ]	Any process specifically pertinent to the functioning of integrated living units: cells, tissues, organs, and organisms. A process is a collection of molecular events with a defined beginning and end [goid 8150] [evidence ND ]	Elemental activities, such as catalysis or binding, describing the actions of a gene product at the molecular level. A given gene product may exhibit one or more molecular functions [goid 3674] [evidence ND ]	FLJ40242; MAGE-B6; MAGEB6A
ILMN_2060449	MAGEB6	MAGEB6	NO	NM_173523.2	MAGEB6	X	Homo sapiens melanoma antigen family B, 6 (MAGEB6), mRNA.	FLJ40242; MAGE-B6; MAGEB6A	MAGEB6	4490681	Homo sapiens	RefSeq	ILMN_11130	NM_173523.2	NM_173523.2		158809	29337289	NM_173523.2	NP_775794.2	4490681	S	1486	GTAGTGAGCTTTCTAAGTAGTGCAGTATAGTAGAGGCTGGAGGGAACAAG	+	26123221-26123270	Xp21.3c	The part of a cell or its extracellular environment in which a gene product is located. A gene product may be located in one or more parts of a cell and its location may be as specific as a particular macromolecular complex, that is, a stable, persistent association of macromolecules that function together [goid 5575] [evidence ND ]	Any process specifically pertinent to the functioning of integrated living units: cells, tissues, organs, and organisms. A process is a collection of molecular events with a defined beginning and end [goid 8150] [evidence ND ]	Elemental activities, such as catalysis or binding, describing the actions of a gene product at the molecular level. A given gene product may exhibit one or more molecular functions [goid 3674] [evidence ND ]	FLJ40242; MAGE-B6; MAGEB6A
ILMN_1666378	MAGEC1	MAGEC1	NO	NM_005462.3	MAGEC1		PREDICTED: Homo sapiens melanoma antigen family C, 1 (MAGEC1), mRNA.		MAGEC1	5890553	Homo sapiens	RefSeq	ILMN_162304	XM_001126506.1	XM_001126506.1		9947	113430630	XM_001126506.1	XP_001126506.1	5890553	A	1616	GTTCCTCAGACACCTTGCTAGAGAGTGATTCCTTGACAGACAGCGAGTCC			Xq27.2a	A membrane-bounded organelle of eukaryotic cells in which chromosomes are housed and replicated. In most cells, the nucleus contains all of the cell's chromosomes except the organellar chromosomes, and is the site of RNA synthesis and processing. In some species, or in specialized cell types, RNA metabolism or DNA replication may be absent [goid 5634] [pmid 18029348] [evidence IDA]; All of the co…		Interacting selectively with any protein or protein complex (a complex of two or more proteins that may include other nonprotein molecules) [goid 5515] [pmid 17137291] [evidence IPI]	MAGE-C1; MGC39366; CT7
ILMN_1681293	MAGEC1	MAGEC1	NO	XM_943067.1	MAGEC1		PREDICTED: Homo sapiens melanoma antigen family C, 1 (MAGEC1), mRNA.		MAGEC1	2060270	Homo sapiens	RefSeq	ILMN_162304	XM_001126506.1	XM_001126506.1		9947	113430630	XM_001126506.1	XP_001126506.1	2060270	S	764	GGAAAGTAGTGAGGAGACAGGGAGTCCTCCCCCTGAGGGCTCTGAGGAAA			Xq27.2a	A membrane-bounded organelle of eukaryotic cells in which chromosomes are housed and replicated. In most cells, the nucleus contains all of the cell's chromosomes except the organellar chromosomes, and is the site of RNA synthesis and processing. In some species, or in specialized cell types, RNA metabolism or DNA replication may be absent [goid 5634] [pmid 18029348] [evidence IDA]; All of the co…		Interacting selectively with any protein or protein complex (a complex of two or more proteins that may include other nonprotein molecules) [goid 5515] [pmid 17137291] [evidence IPI]
ILMN_1720041	MAGEC1	MAGEC1	NO	NM_005462.3	MAGEC1	X	Homo sapiens melanoma antigen family C, 1 (MAGEC1), mRNA.	MAGE-C1; MGC39366; CT7	MAGEC1	10446	Homo sapiens	RefSeq	ILMN_23606	NM_005462.3	NM_005462.3		9947	58530875	NM_005462.3	NP_005453.2	10446	I	3759	GAGTTTCTACGTGGTGGAGGGCCTGGTTGAGGCTGGAGAGAACACAGTGC	+	140824329-140824378	Xq27.2a	A membrane-bounded organelle of eukaryotic cells in which chromosomes are housed and replicated. In most cells, the nucleus contains all of the cell's chromosomes except the organellar chromosomes, and is the site of RNA synthesis and processing. In some species, or in specialized cell types, RNA metabolism or DNA replication may be absent [goid 5634] [pmid 18029348] [evidence IDA]; All of the co…		Interacting selectively with any protein or protein complex (a complex of two or more proteins that may include other nonprotein molecules) [goid 5515] [pmid 17137291] [evidence IPI]	MAGE-C1; MGC39366; CT7
ILMN_2241627	MAGEC1	MAGEC1	NO	NM_005462.3	MAGEC1	X	Homo sapiens melanoma antigen family C, 1 (MAGEC1), mRNA.	MAGE-C1; MGC39366; CT7	MAGEC1	7650731	Homo sapiens	RefSeq	ILMN_173346	NM_005462.3	NM_005462.3		9947	58530875	NM_005462.3	NP_005453.2	7650731	I	4000	CACACCCAAACACACCACATTGGGAAAACCTTCTGCCTCATTTTGTGATG	+	140824570-140824619	Xq27.2a	A membrane-bounded organelle of eukaryotic cells in which chromosomes are housed and replicated. In most cells, the nucleus contains all of the cell's chromosomes except the organellar chromosomes, and is the site of RNA synthesis and processing. In some species, or in specialized cell types, RNA metabolism or DNA replication may be absent [goid 5634] [pmid 18029348] [evidence IDA]; All of the co…		Interacting selectively with any protein or protein complex (a complex of two or more proteins that may include other nonprotein molecules) [goid 5515] [pmid 17137291] [evidence IPI]	MAGE-C1; MGC39366; CT7
ILMN_1757152	MAGEC2	MAGEC2	NO	NM_016249.2	MAGEC2	X	Homo sapiens melanoma antigen family C, 2 (MAGEC2), mRNA.	HCA587; CT10; MAGEE1; MGC13377	MAGEC2	2750364	Homo sapiens	RefSeq	ILMN_14671	NM_016249.2	NM_016249.2		51438	29337297	NM_016249.2	NP_057333.1	2750364	S	1516	GGTTCTAGGTAGTGGAGGGCCAGGTGGGGCTCGAGGAACGTAGTGTTCTT	-	141290556-141290605	Xq27.2a	A membrane-bounded organelle of eukaryotic cells in which chromosomes are housed and replicated. In most cells, the nucleus contains all of the cell's chromosomes except the organellar chromosomes, and is the site of RNA synthesis and processing. In some species, or in specialized cell types, RNA metabolism or DNA replication may be absent [goid 5634] [pmid 12920247] [evidence IDA]; All of the co…			CT10; HCA587; MAGEE1; MGC13377
ILMN_2088876	MAGEC2	MAGEC2	NO	NM_016249.2	MAGEC2	X	Homo sapiens melanoma antigen family C, 2 (MAGEC2), mRNA.	HCA587; CT10; MAGEE1; MGC13377	MAGEC2	4200722	Homo sapiens	RefSeq	ILMN_14671	NM_016249.2	NM_016249.2		51438	29337297	NM_016249.2	NP_057333.1	4200722	S	1847	TAGTGGAACAAAATTGAAGGGTGGTCAGTAGTTTCATTTCCTTGTCCTGC	-	141290225-141290274	Xq27.2a	A membrane-bounded organelle of eukaryotic cells in which chromosomes are housed and replicated. In most cells, the nucleus contains all of the cell's chromosomes except the organellar chromosomes, and is the site of RNA synthesis and processing. In some species, or in specialized cell types, RNA metabolism or DNA replication may be absent [goid 5634] [pmid 12920247] [evidence IDA]; All of the co…			CT10; HCA587; MAGEE1; MGC13377
ILMN_1658623	MAGEC3	MAGEC3	NO	NM_177456.2	MAGEC3	X	Homo sapiens melanoma antigen family C, 3 (MAGEC3), transcript variant 2, mRNA.	MGC119270; MGC119271; HCA2; MAGEC4; MAGE-C3	MAGEC3	2750255	Homo sapiens	RefSeq	ILMN_5167	NM_177456.2	NM_177456.2		139081	58530877	NM_177456.2	NP_803251.1	2750255	I	518	AACAGGCCTCATGCCTCTCTTTCCAAACCTTCCACGCCTCAGCTTTGAGG	+	140812095-140812104:140812105-140812144	Xq27.2a				MGC119270; MGC119271; HCA2; MAGEC4; MAGE-C3
ILMN_1659484	MAGEC3	MAGEC3	NO	NM_177456.2	MAGEC3	X	Homo sapiens melanoma antigen family C, 3 (MAGEC3), transcript variant 2, mRNA.	MGC119270; MGC119271; HCA2; MAGEC4; MAGE-C3	MAGEC3	290746	Homo sapiens	RefSeq	ILMN_5167	NM_177456.2	NM_177456.2		139081	58530877	NM_177456.2	NP_803251.1	290746	I	1419	CATTGGGTGCAGAGAAAGTACCTGGAGTACCGGGAGGTGCCCAACAGTGC	+	140812996-140813045	Xq27.2a				MGC119270; MGC119271; HCA2; MAGEC4; MAGE-C3
ILMN_1709296	MAGEC3	MAGEC3	NO	NM_177456.2	MAGEC3	X	Homo sapiens melanoma antigen family C, 3 (MAGEC3), transcript variant 2, mRNA.	MGC119270; MGC119271; HCA2; MAGEC4; MAGE-C3	MAGEC3	3310377	Homo sapiens	RefSeq	ILMN_5167	NM_177456.2	NM_177456.2		139081	58530877	NM_177456.2	NP_803251.1	3310377	A	1655	CCATGGCCAGTGCAAGCCCCAGTGTCATGTCCACCAACTTCTGTCCTGAG	+	140813232-140813281	Xq27.2a				MGC119270; MGC119271; HCA2; MAGEC4; MAGE-C3
ILMN_1750895	MAGEC3	MAGEC3	NO	NM_138702.1	MAGEC3	X	Homo sapiens melanoma antigen family C, 3 (MAGEC3), transcript variant 1, mRNA.	MGC119270; MGC119271; HCA2; MAGEC4; MAGE-C3	MAGEC3	4120220	Homo sapiens	RefSeq	ILMN_6466	NM_138702.1	NM_138702.1		139081	20162567	NM_138702.1	NP_619647.1	4120220	I	1070	AAGATGGCCGCCGAGGGCTGACCGAGGCGTCCCCACAACAGAAGAAGGGA	+	140810958-140811007	Xq27.2a				MGC119270; MGC119271; HCA2; MAGEC4; MAGE-C3
ILMN_1662914	MIA2	CTAGE5	YES	NM_203354.1	CTAGE5	14	Homo sapiens CTAGE family, member 5 (CTAGE5), transcript variant 2, mRNA.	MEA6; MGEA; MGEA6; MGEA11	CTAGE5	3440110	Homo sapiens	RefSeq	ILMN_28819	NM_203354.2	NM_203354.2		4253	134053955	NM_203354.2	NP_976229.1	3440110	I	25	GCAGGATATATTAGAATCTGAAATCTTTCTCAAGGATATGAGGTGCCTGG	+	38804251-38804300	14q21.1b	All of the contents of a cell excluding the plasma membrane and nucleus, but including other subcellular structures [goid 5737] [pmid 18029348] [evidence IDA]; A semiautonomous, self replicating organelle that occurs in varying numbers, shapes, and sizes in the cytoplasm of virtually all eukaryotic cells. It is notably the site of tissue respiration [goid 5739] [pmid 18029348] [evidence IDA]; All…		Interacting selectively with any protein or protein complex (a complex of two or more proteins that may include other nonprotein molecules) [goid 5515] [pmid 9356211] [evidence TAS]; Increases the activity of an enzyme [goid 8047] [pmid 9356211] [evidence TAS]	MEA6; cTAGE-5C; MGEA; MGEA6; cTAGE-5B; cTAGE-5D; MGEA11; CTAGE-5A
ILMN_1690880	MIA2	CTAGE5	YES	NM_203356.1	CTAGE5	14	Homo sapiens CTAGE family, member 5 (CTAGE5), transcript variant 4, mRNA.	MEA6; cTAGE-5C; MGEA; MGEA6; cTAGE-5B; cTAGE-5D; MGEA11; CTAGE-5A	CTAGE5	7650504	Homo sapiens	RefSeq	ILMN_162322	NM_203356.1	NM_203356.1		4253	42740900	NM_203356.1	NP_976231.1	7650504	A	4202	TGGAACACTTCACCCCAGCATTTCCCCAGGTGTTGTTTGGAACACTGATC	+	38890241-38890290	14q21.1b	All of the contents of a cell excluding the plasma membrane and nucleus, but including other subcellular structures [goid 5737] [pmid 18029348] [evidence IDA]; A semiautonomous, self replicating organelle that occurs in varying numbers, shapes, and sizes in the cytoplasm of virtually all eukaryotic cells. It is notably the site of tissue respiration [goid 5739] [pmid 18029348] [evidence IDA]; All…		Interacting selectively with any protein or protein complex (a complex of two or more proteins that may include other nonprotein molecules) [goid 5515] [pmid 9356211] [evidence TAS]; Increases the activity of an enzyme [goid 8047] [pmid 9356211] [evidence TAS]	MEA6; cTAGE-5C; MGEA; MGEA6; cTAGE-5B; cTAGE-5D; CTAGE-5A; MGEA11
ILMN_1754956	MIA2	CTAGE5	YES	NM_203356.1	CTAGE5	14	Homo sapiens CTAGE family, member 5 (CTAGE5), transcript variant 4, mRNA.	MEA6; MGEA; MGEA6; MGEA11	CTAGE5	5080187	Homo sapiens	RefSeq	ILMN_162322	NM_203356.2	NM_203356.2		4253	134053890	NM_203356.2	NP_976231.1	5080187	I	89	CTACTTTTAGCTCCTCTTCTCGGAGGAAAACAGCACGCACCGCGCCAGGC	+	38805341-38805390	14q21.1b	All of the contents of a cell excluding the plasma membrane and nucleus, but including other subcellular structures [goid 5737] [pmid 18029348] [evidence IDA]; A semiautonomous, self replicating organelle that occurs in varying numbers, shapes, and sizes in the cytoplasm of virtually all eukaryotic cells. It is notably the site of tissue respiration [goid 5739] [pmid 18029348] [evidence IDA]; All…		Interacting selectively with any protein or protein complex (a complex of two or more proteins that may include other nonprotein molecules) [goid 5515] [pmid 9356211] [evidence TAS]; Increases the activity of an enzyme [goid 8047] [pmid 9356211] [evidence TAS]	MEA6; cTAGE-5C; MGEA; MGEA6; cTAGE-5B; cTAGE-5D; CTAGE-5A; MGEA11
ILMN_2314080	MIA2	CTAGE5	YES	NM_203355.1	CTAGE5	14	Homo sapiens CTAGE family, member 5 (CTAGE5), transcript variant 3, mRNA.	MEA6; cTAGE-5C; MGEA; MGEA6; cTAGE-5B; cTAGE-5D; MGEA11; CTAGE-5A	CTAGE5	460167	Homo sapiens	RefSeq	ILMN_28938	NM_203355.1	NM_203355.1		4253	42740898	NM_203355.1	NP_976230.1	460167	A	1835	TCCAAATACAGCATTTGGCAGAGGCTCACGAGGCCCAGGGAATCCTCTGG	+	38858224-38858246:38865819-38865845	14q21.1b	All of the contents of a cell excluding the plasma membrane and nucleus, but including other subcellular structures [goid 5737] [pmid 18029348] [evidence IDA]; A semiautonomous, self replicating organelle that occurs in varying numbers, shapes, and sizes in the cytoplasm of virtually all eukaryotic cells. It is notably the site of tissue respiration [goid 5739] [pmid 18029348] [evidence IDA]; All…		Interacting selectively with any protein or protein complex (a complex of two or more proteins that may include other nonprotein molecules) [goid 5515] [pmid 9356211] [evidence TAS]; Increases the activity of an enzyme [goid 8047] [pmid 9356211] [evidence TAS]	MEA6; cTAGE-5C; MGEA; MGEA6; cTAGE-5B; cTAGE-5D; MGEA11; CTAGE-5A
ILMN_1656743	MIA2	MIA2	NO	NM_054024.3	MIA2	14	Homo sapiens melanoma inhibitory activity 2 (MIA2), mRNA.	FLJ22404	MIA2	4540674	Homo sapiens	RefSeq	ILMN_30061	NM_054024.3	NM_054024.3		117153	46094008	NM_054024.3	NP_473365.3	4540674	S	1849	CGAAACCATCAGTAGACACCGAAGGGCCTGCTCTGGTGGAGATAGACAGA	+	38791790-38791839	14q21.1b	The space external to the outermost structure of a cell. For cells without external protective or external encapsulating structures this refers to space outside of the plasma membrane. This term covers the host cell environment outside an intracellular parasite [goid 5576] [evidence IEA]			FLJ22404
ILMN_2158665	MIA2	MIA2	NO	NM_054024.3	MIA2	14	Homo sapiens melanoma inhibitory activity 2 (MIA2), mRNA.	FLJ22404	MIA2	1500100	Homo sapiens	RefSeq	ILMN_30061	NM_054024.3	NM_054024.3		117153	46094008	NM_054024.3	NP_473365.3	1500100	S	1910	TACCCTGCTAAATAGTCAGATGGTTTCAACTGATAACTCTTTGTCTTCTC	+	38791851-38791900	14q21.1b	The space external to the outermost structure of a cell. For cells without external protective or external encapsulating structures this refers to space outside of the plasma membrane. This term covers the host cell environment outside an intracellular parasite [goid 5576] [evidence IEA]			FLJ22404
ILMN_1808970	MORC1	MORC1	NO	NM_014429.2	MORC1	3	Homo sapiens MORC family CW-type zinc finger 1 (MORC1), mRNA.	ZCW6; MORC	MORC1	5390390	Homo sapiens	RefSeq	ILMN_22476	NM_014429.2	NM_014429.2		27136	68161547	NM_014429.2	NP_055244.2	5390390	S	3458	GCCCTTTCTCCACTATAGCCAACACTCAGTCAAGCAGAAAATACAAATCC	-	110160011-110160060	3q13.13a	A membrane-bounded organelle of eukaryotic cells in which chromosomes are housed and replicated. In most cells, the nucleus contains all of the cell's chromosomes except the organellar chromosomes, and is the site of RNA synthesis and processing. In some species, or in specialized cell types, RNA metabolism or DNA replication may be absent [goid 5634] [pmid 10369865] [evidence TAS]	The biological process whose specific outcome is the progression of a multicellular organism over time from an initial condition (e.g. a zygote or a young adult) to a later condition (e.g. a multicellular animal or an aged adult) [goid 7275] [evidence IEA]; The process of formation of spermatozoa, including spermatocytogenesis and spermiogenesis [goid 7283] [pmid 10369865] [evidence TAS]; The pro…	Interacting selectively with ATP, adenosine 5'-triphosphate, a universally important coenzyme and enzyme regulator [goid 5524] [evidence IEA]; Interacting selectively with zinc (Zn) ions [goid 8270] [evidence IEA]; Interacting selectively with any metal ion [goid 46872] [evidence IEA]	ZCW6; MORC
ILMN_1652085	MPHOSPH10	MPHOSPH10	NO	NM_005791.1	MPHOSPH10	2	Homo sapiens M-phase phosphoprotein 10 (U3 small nucleolar ribonucleoprotein) (MPHOSPH10), mRNA.	MPP10P; MPP10	MPHOSPH10	2350563	Homo sapiens	RefSeq	ILMN_161971	NM_005791.1	NM_005791.1		10199	31317304	NM_005791.1	NP_005782.1	2350563	S	1961	GAAGTAGCCCCAGTGAGTGTTAGTGATGCAGCTCTCCTGGCCCCAGAGGA	+	71228688-71228737	2p13.3b	A membrane-bounded organelle of eukaryotic cells in which chromosomes are housed and replicated. In most cells, the nucleus contains all of the cell's chromosomes except the organellar chromosomes, and is the site of RNA synthesis and processing. In some species, or in specialized cell types, RNA metabolism or DNA replication may be absent [goid 5634] [evidence IEA]; A small, dense body one or mo…	Any process involved in the conversion of a primary ribosomal RNA (rRNA) transcript into one or more mature rRNA molecules [goid 6364] [evidence IEA]; The process of removing sections of the primary RNA transcript to remove sequences not present in the mature form of the RNA and joining the remaining sections to form the mature form of the RNA [goid 8380] [pmid 9450966] [evidence NAS]	Interacting selectively with any protein or protein complex (a complex of two or more proteins that may include other nonprotein molecules) [goid 5515] [pmid 12655004] [evidence IPI]; An activity which assists splicing of substrate RNA(s) by facilitating the formation and stabilization of a series of catalytic conformations in which key RNA sequences are positioned for a series of two transesteri…	MPP10P; MPP10
ILMN_2229950	MPHOSPH10	MPHOSPH10	NO	NM_005791.1	MPHOSPH10	2	Homo sapiens M-phase phosphoprotein 10 (U3 small nucleolar ribonucleoprotein) (MPHOSPH10), mRNA.	MPP10P; MPP10	MPHOSPH10	1580142	Homo sapiens	RefSeq	ILMN_161971	NM_005791.1	NM_005791.1		10199	31317304	NM_005791.1	NP_005782.1	1580142	S	2154	AGAGCAGTGTAGATCAAGCAGGGAAATACAGCAAAACAGTAGCTTCGGAG	+	71229997-71230046	2p13.3b	A membrane-bounded organelle of eukaryotic cells in which chromosomes are housed and replicated. In most cells, the nucleus contains all of the cell's chromosomes except the organellar chromosomes, and is the site of RNA synthesis and processing. In some species, or in specialized cell types, RNA metabolism or DNA replication may be absent [goid 5634] [evidence IEA]; A small, dense body one or mo…	Any process involved in the conversion of a primary ribosomal RNA (rRNA) transcript into one or more mature rRNA molecules [goid 6364] [evidence IEA]; The process of removing sections of the primary RNA transcript to remove sequences not present in the mature form of the RNA and joining the remaining sections to form the mature form of the RNA [goid 8380] [pmid 9450966] [evidence NAS]	Interacting selectively with any protein or protein complex (a complex of two or more proteins that may include other nonprotein molecules) [goid 5515] [pmid 12655004] [evidence IPI]; An activity which assists splicing of substrate RNA(s) by facilitating the formation and stabilization of a series of catalytic conformations in which key RNA sequences are positioned for a series of two transesteri…	MPP10P; MPP10
ILMN_1746820	NLRP4	NLRP4	NO	NM_134444.3	NLRP4	19	Homo sapiens NLR family, pyrin domain containing 4 (NLRP4), mRNA.	PAN2; NALP4; CLR19.5; PYPAF4; FLJ32126; RNH2	NLRP4	2630152	Homo sapiens	RefSeq	ILMN_13312	NM_134444.3	NM_134444.3		147945	54792746	NM_134444.3	NP_604393.1	2630152	S	3042	CTGATTGCGAGGAACCTGGGCTCTGACTCGAACACCTGCAAAGGACAGGG	+	61084762-61084765:61084766-61084811	19q13.42c			Interacting selectively with a nucleotide, any compound consisting of a nucleoside that is esterified with (ortho)phosphate or an oligophosphate at any hydroxyl group on the ribose or deoxyribose moiety [goid 166] [evidence IEA]; Interacting selectively with any protein or protein complex (a complex of two or more proteins that may include other nonprotein molecules) [goid 5515] [evidence IEA]; I…	PAN2; NALP4; CLR19.5; PYPAF4; FLJ32126; RNH2
ILMN_1756052	NOL4	NOL4	NO	NM_003787.1	NOL4	18	Homo sapiens nucleolar protein 4 (NOL4), mRNA.	NOLP; HRIHFB2255	NOL4	7510041	Homo sapiens	RefSeq	ILMN_16134	NM_003787.3	NM_003787.3		8715	148235599	NM_003787.3	NP_003778.2	7510041	S	2017	CTCCAGACCCCAGCTGAGTCCAACTGAAATCAATGCCGTGAGACAGCTTG	-	31432885-31432934	18q12.1f-q12.1g	A membrane-bounded organelle of eukaryotic cells in which chromosomes are housed and replicated. In most cells, the nucleus contains all of the cell's chromosomes except the organellar chromosomes, and is the site of RNA synthesis and processing. In some species, or in specialized cell types, RNA metabolism or DNA replication may be absent [goid 5634] [evidence IEA]; A small, dense body one or mo…		Interacting selectively with an RNA molecule or a portion thereof [goid 3723] [pmid 9813152] [evidence TAS]	NOLP; HRIHFB2255
ILMN_2087629	NOL4	NOL4	NO	NM_003787.1	NOL4	18	Homo sapiens nucleolar protein 4 (NOL4), mRNA.	NOLP; HRIHFB2255	NOL4	4540736	Homo sapiens	RefSeq	ILMN_16134	NM_003787.1	NM_003787.1		8715	4505420	NM_003787.1	NP_003778.1	4540736	S	2356	GTCCTTGATCCGTAAGTGATGTGTTAAGGTGCTTCAAAGGAACTCTGACC	-	29686619-29686668	18q12.1f-q12.1g	A membrane-bounded organelle of eukaryotic cells in which chromosomes are housed and replicated. In most cells, the nucleus contains all of the cell's chromosomes except the organellar chromosomes, and is the site of RNA synthesis and processing. In some species, or in specialized cell types, RNA metabolism or DNA replication may be absent [goid 5634] [evidence IEA]; A small, dense body one or mo…		Interacting selectively with an RNA molecule or a portion thereof [goid 3723] [pmid 9813152] [evidence TAS]	NOLP; HRIHFB2255
ILMN_1686832	NR6A1	NR6A1	NO	NM_033334.2	NR6A1	9	Homo sapiens nuclear receptor subfamily 6, group A, member 1 (NR6A1), transcript variant 2, mRNA.	NR61; GCNF; GCNF1; RTR	NR6A1	4150392	Homo sapiens	RefSeq	ILMN_19147	NM_001489.3	NM_001489.3		2649	53729326	NM_001489.3	NP_001480.3	4150392	A	1676	AGCCAGAGAGACCAAGATGGAGGCTGTGGAGCAGCATTTCCCGTTGCCTC	-	127284864-127284913	9q33.3a	A membrane-bounded organelle of eukaryotic cells in which chromosomes are housed and replicated. In most cells, the nucleus contains all of the cell's chromosomes except the organellar chromosomes, and is the site of RNA synthesis and processing. In some species, or in specialized cell types, RNA metabolism or DNA replication may be absent [goid 5634] [evidence IEA]; Any complex, distinct from RN…	Any process that stops, prevents or reduces the frequency, rate or extent of transcription from an RNA polymerase II promoter [goid 122] [evidence ISS]; The synthesis of either RNA on a template of DNA or DNA on a template of RNA [goid 6350] [evidence IEA]; Any process that modulates the frequency, rate or extent of DNA-dependent transcription [goid 6355] [evidence IEA]; The generation and mainte…	The function of binding to a specific DNA sequence in order to modulate transcription. The transcription factor may or may not also interact selectively with a protein or macromolecular complex [goid 3700] [evidence IEA]; Combining with a steroid hormone to initiate a change in cell activity [goid 3707] [evidence IEA]; Interacting selectively with zinc (Zn) ions [goid 8270] [evidence IEA]; Intera…	NR61; GCNF1; RTR; GCNF
ILMN_2352881	NR6A1	NR6A1	NO	NM_001489.3	NR6A1	9	Homo sapiens nuclear receptor subfamily 6, group A, member 1 (NR6A1), transcript variant 2, mRNA.	NR61; GCNF; GCNF1; RTR	NR6A1	510735	Homo sapiens	RefSeq	ILMN_19147	NM_001489.3	NM_001489.3		2649	53729326	NM_001489.3	NP_001480.3	510735	A	1187	GGGGAACTGGCTGATGTCACTGCCAAGTACTCGCCCTCCGATGAAGAACT	-	127298162-127298211	9q33.3a	A membrane-bounded organelle of eukaryotic cells in which chromosomes are housed and replicated. In most cells, the nucleus contains all of the cell's chromosomes except the organellar chromosomes, and is the site of RNA synthesis and processing. In some species, or in specialized cell types, RNA metabolism or DNA replication may be absent [goid 5634] [evidence IEA]; Any complex, distinct from RN…	Any process that stops, prevents or reduces the frequency, rate or extent of transcription from an RNA polymerase II promoter [goid 122] [evidence ISS]; The synthesis of either RNA on a template of DNA or DNA on a template of RNA [goid 6350] [evidence IEA]; Any process that modulates the frequency, rate or extent of DNA-dependent transcription [goid 6355] [evidence IEA]; The generation and mainte…	The function of binding to a specific DNA sequence in order to modulate transcription. The transcription factor may or may not also interact selectively with a protein or macromolecular complex [goid 3700] [evidence IEA]; Combining with a steroid hormone to initiate a change in cell activity [goid 3707] [evidence IEA]; Interacting selectively with zinc (Zn) ions [goid 8270] [evidence IEA]; Intera…	NR61; GCNF1; RTR; GCNF
ILMN_1658695	NUF2	NUF2	NO	NM_031423.2	NUF2	1	Homo sapiens NUF2, NDC80 kinetochore complex component, homolog (S. cerevisiae) (NUF2), transcript variant 2, mRNA.	NUF2R; CDCA1	NUF2	2000458	Homo sapiens	RefSeq	ILMN_16808	NM_031423.3	NM_031423.3		83540	117968352	NM_031423.3	NP_113611.2	2000458	A	1437	CTGCTTTGGAGAAATACCACGACGGTATTGAAAAGGCAGCAGAGGACTCC	+	161591771-161591820	1q23.3c	The region of a chromosome that includes the centromere and associated proteins. In monocentric chromosomes, this region corresponds to a single area of the chromosome, whereas in holocentric chromosomes, it is evenly distributed along the chromosome [goid 775] [pmid 11266451] [evidence NAS]; A multisubunit complex that is located at the centromeric region of a condensed chromosome and provides a…	The progression of biochemical and morphological phases and events that occur in a cell during successive cell replication or nuclear replication events. Canonically, the cell cycle comprises the replication and segregation of genetic material followed by the division of the cell, but in endocycles or syncytial cells nuclear replication or nuclear division may not be followed by cell division [go…	Elemental activities, such as catalysis or binding, describing the actions of a gene product at the molecular level. A given gene product may exhibit one or more molecular functions [goid 3674] [evidence ND ]; Interacting selectively with any protein or protein complex (a complex of two or more proteins that may include other nonprotein molecules) [goid 5515] [pmid 15961401] [evidence IPI]; Inter…	NUF2R
ILMN_2406724	NUF2	NUF2	NO	NM_031423.3	NUF2	1	Homo sapiens NUF2, NDC80 kinetochore complex component, homolog (S. cerevisiae) (NUF2), transcript variant 2, mRNA.	NUF2R; CDCA1	NUF2	6590458	Homo sapiens	RefSeq	ILMN_16808	NM_031423.3	NM_031423.3		83540	117968352	NM_031423.3	NP_113611.2	6590458	A	1370	CAACAACTAAAAGATGCTGCTGAAAGGGAGAAACTGAAGTCCCAGGAAAT	+	161585450-161585494:161591749-161591753	1q23.3c	The region of a chromosome that includes the centromere and associated proteins. In monocentric chromosomes, this region corresponds to a single area of the chromosome, whereas in holocentric chromosomes, it is evenly distributed along the chromosome [goid 775] [pmid 11266451] [evidence NAS]; A multisubunit complex that is located at the centromeric region of a condensed chromosome and provides a…	The progression of biochemical and morphological phases and events that occur in a cell during successive cell replication or nuclear replication events. Canonically, the cell cycle comprises the replication and segregation of genetic material followed by the division of the cell, but in endocycles or syncytial cells nuclear replication or nuclear division may not be followed by cell division [go…	Elemental activities, such as catalysis or binding, describing the actions of a gene product at the molecular level. A given gene product may exhibit one or more molecular functions [goid 3674] [evidence ND ]; Interacting selectively with any protein or protein complex (a complex of two or more proteins that may include other nonprotein molecules) [goid 5515] [pmid 15961401] [evidence IPI]; Inter…	NUF2R
ILMN_2253537	NXF2	NXF2	NO	NM_022053.1	NXF2	X	Homo sapiens nuclear RNA export factor 2 (NXF2), transcript variant 2, mRNA.	TAPL-2; FLJ20416	NXF2	670653	Homo sapiens	RefSeq	ILMN_17503	NM_022053.1	NM_022053.1		56001	13430853	NM_022053.1	NP_071336.1	670653	I	9	AGATTCTGAGGGGAAGTGTAGCTCCCAGGTTGGTTCCAAGTCTTCTTCCA	+	101388834-101388883	Xq22.1d	The living contents of a cell; the matter contained within (but not including) the plasma membrane, usually taken to exclude large vacuoles and masses of secretory or ingested material. In eukaryotes it includes the nucleus and cytoplasm [goid 5622] [evidence IEA]; A membrane-bounded organelle of eukaryotic cells in which chromosomes are housed and replicated. In most cells, the nucleus contains …	The directed movement of mRNA from the nucleus to the cytoplasm [goid 6406] [pmid 11073998] [evidence NAS]; The directed movement of substances (such as macromolecules, small molecules, ions) into, out of, within or between cells, or within a multicellular organism [goid 6810] [evidence IEA]; The biological process whose specific outcome is the progression of a multicellular organism over time fr…	Interacting selectively with a nucleotide, any compound consisting of a nucleoside that is esterified with (ortho)phosphate or an oligophosphate at any hydroxyl group on the ribose or deoxyribose moiety [goid 166] [evidence IEA]; Interacting selectively with an RNA molecule or a portion thereof [goid 3723] [pmid 11073998] [evidence NAS]; Interacting selectively with any protein or protein complex…	TAPL-2; FLJ20416
ILMN_2333829	NXF2	NXF2	NO	NM_022053.1	NXF2	X	Homo sapiens nuclear RNA export factor 2 (NXF2), transcript variant 2, mRNA.	TAPL-2; FLJ20416	NXF2	4860333	Homo sapiens	RefSeq	ILMN_17503	NM_022053.1	NM_022053.1		56001	13430853	NM_022053.1	NP_071336.1	4860333	A	2060	TTCACTATGCTCCAGACCGAGGGCAAGATCCCCGCAGAGGCCTTCAAGCA	+	101467879-101467893:101468040-101468074	Xq22.1d	The living contents of a cell; the matter contained within (but not including) the plasma membrane, usually taken to exclude large vacuoles and masses of secretory or ingested material. In eukaryotes it includes the nucleus and cytoplasm [goid 5622] [evidence IEA]; A membrane-bounded organelle of eukaryotic cells in which chromosomes are housed and replicated. In most cells, the nucleus contains …	The directed movement of mRNA from the nucleus to the cytoplasm [goid 6406] [pmid 11073998] [evidence NAS]; The directed movement of substances (such as macromolecules, small molecules, ions) into, out of, within or between cells, or within a multicellular organism [goid 6810] [evidence IEA]; The biological process whose specific outcome is the progression of a multicellular organism over time fr…	Interacting selectively with a nucleotide, any compound consisting of a nucleoside that is esterified with (ortho)phosphate or an oligophosphate at any hydroxyl group on the ribose or deoxyribose moiety [goid 166] [evidence IEA]; Interacting selectively with an RNA molecule or a portion thereof [goid 3723] [pmid 11073998] [evidence NAS]; Interacting selectively with any protein or protein complex…	TAPL-2; FLJ20416
ILMN_1718236	NXF2B	NXF2B	NO	XM_927154.1	NXF2B	X	Homo sapiens nuclear RNA export factor 2B (NXF2B), mRNA.	bA353J17.1	NXF2B	5290066	Homo sapiens	RefSeq	ILMN_307102	NM_001099686.1	NM_001099686.1		728343	153791281	NM_001099686.1	NP_001093156.1	5290066	S	179	ACCTGATGTCTTTTCTGTCACAGATCTGATAGAGACAGTTAATGAAGTTT	-	101724028-101724077	Xq22.1d	The living contents of a cell; the matter contained within (but not including) the plasma membrane, usually taken to exclude large vacuoles and masses of secretory or ingested material. In eukaryotes it includes the nucleus and cytoplasm [goid 5622] [evidence IEA]	The directed movement of substances (such as macromolecules, small molecules, ions) into, out of, within or between cells, or within a multicellular organism [goid 6810] [evidence IEA]	Interacting selectively with a nucleotide, any compound consisting of a nucleoside that is esterified with (ortho)phosphate or an oligophosphate at any hydroxyl group on the ribose or deoxyribose moiety [goid 166] [evidence IEA]; Interacting selectively with any protein or protein complex (a complex of two or more proteins that may include other nonprotein molecules) [goid 5515] [evidence IEA]
ILMN_1731280	NXF2B	NXF2B	NO	XM_932085.1	NXF2B	X	Homo sapiens nuclear RNA export factor 2B (NXF2B), mRNA.	bA353J17.1	NXF2B	7400592	Homo sapiens	RefSeq	ILMN_307102	NM_001099686.1	NM_001099686.1		728343	153791281	NM_001099686.1	NP_001093156.1	7400592	I	417	GTTAAGGAGACCTTGCTATCACTGCTATTACCATGGCAGAACCGCCTAAG	-	101719595-101719636:101720370-101720377	Xq22.1d	The living contents of a cell; the matter contained within (but not including) the plasma membrane, usually taken to exclude large vacuoles and masses of secretory or ingested material. In eukaryotes it includes the nucleus and cytoplasm [goid 5622] [evidence IEA]	The directed movement of substances (such as macromolecules, small molecules, ions) into, out of, within or between cells, or within a multicellular organism [goid 6810] [evidence IEA]	Interacting selectively with a nucleotide, any compound consisting of a nucleoside that is esterified with (ortho)phosphate or an oligophosphate at any hydroxyl group on the ribose or deoxyribose moiety [goid 166] [evidence IEA]; Interacting selectively with any protein or protein complex (a complex of two or more proteins that may include other nonprotein molecules) [goid 5515] [evidence IEA]
ILMN_1708182	ODF1	ODF1	NO	NM_024410.2	ODF1	8	Homo sapiens outer dense fiber of sperm tails 1 (ODF1), mRNA.	ODFPGB; ODFPGA; SODF; ODFP; ODF27; HSPB10; ODFPG; ODF; MGC129928; MGC129929; RT7; ODF2	ODF1	3120427	Homo sapiens	RefSeq	ILMN_24006	NM_024410.2	NM_024410.2		4956	24430179	NM_024410.2	NP_077721.1	3120427	S	758	GCAGCCCCTGCAACCCGTGCAGCCCATATGATCCTTGCAACCCGTGTTAT	+	103642197-103642246	8q22.3b	Structure or material found in the flagella of mammalian sperm that surrounds each of the nine microtubule doublets, giving a 9 + 9 + 2 arrangement rather than the 9 + 2 pattern usually seen. These dense fibers are stiff and noncontractile [goid 1520] [evidence NAS]	The biological process whose specific outcome is the progression of a multicellular organism over time from an initial condition (e.g. a zygote or a young adult) to a later condition (e.g. a multicellular animal or an aged adult) [goid 7275] [evidence IEA]; The process of formation of spermatozoa, including spermatocytogenesis and spermiogenesis [goid 7283] [evidence NAS]; The process whereby rel…	The action of a molecule that contributes to the structural integrity of a complex or assembly within or outside a cell [goid 5198] [evidence NAS]	ODFPGB; ODFPGA; SODF; ODFP; ODF27; HSPB10; ODFPG; ODF; MGC129928; MGC129929; RT7; ODF2
ILMN_1671288	ODF2	ODF2	NO	NM_153437.1	ODF2	9	Homo sapiens outer dense fiber of sperm tails 2 (ODF2), transcript variant 1, mRNA.	ODF84; MGC9034; MGC111096; ODF2/2; ODF2/1; FLJ44866	ODF2	770747	Homo sapiens	RefSeq	ILMN_1195	NM_002540.3	NM_002540.3		4957	24430180	NM_002540.3	NP_002531.3	770747	A	2247	GAACAAAGAGATTGAGGCGGCACGAAGGCAGTTCCAGTCTCAGCTGGCTG	+	130294887-130294905:130296610-130296640	9q34.11b	A membrane-bounded organelle of eukaryotic cells in which chromosomes are housed and replicated. In most cells, the nucleus contains all of the cell's chromosomes except the organellar chromosomes, and is the site of RNA synthesis and processing. In some species, or in specialized cell types, RNA metabolism or DNA replication may be absent [goid 5634] [pmid 18029348] [evidence IDA]; All of the co…	The biological process whose specific outcome is the progression of a multicellular organism over time from an initial condition (e.g. a zygote or a young adult) to a later condition (e.g. a multicellular animal or an aged adult) [goid 7275] [evidence IEA]; The process of formation of spermatozoa, including spermatocytogenesis and spermiogenesis [goid 7283] [evidence IEA]; The process whereby rel…	The action of a molecule that contributes to the structural integrity of a complex or assembly within or outside a cell [goid 5198] [pmid 10072582] [evidence TAS]	ODF84; MGC9034; ODF2/1; MGC111096; ODF2/2; FLJ44866
ILMN_1698653	ODF2	ODF2	NO	NM_153437.1	ODF2	9	Homo sapiens outer dense fiber of sperm tails 2 (ODF2), transcript variant 2, mRNA.	ODF84; MGC9034; ODF2/1; MGC111096; ODF2/2; FLJ44866	ODF2	1190066	Homo sapiens	RefSeq	ILMN_23115	NM_153437.1	NM_153437.1		4957	24430182	NM_153437.1	NP_702915.1	1190066	I	2132	AGAAAGGGTCCCACGAACTGACCCGAGCAGGGGCCCGCATACCAAGATGA	+	130296782-130296831	9q34.11b	A membrane-bounded organelle of eukaryotic cells in which chromosomes are housed and replicated. In most cells, the nucleus contains all of the cell's chromosomes except the organellar chromosomes, and is the site of RNA synthesis and processing. In some species, or in specialized cell types, RNA metabolism or DNA replication may be absent [goid 5634] [pmid 18029348] [evidence IDA]; All of the co…	The biological process whose specific outcome is the progression of a multicellular organism over time from an initial condition (e.g. a zygote or a young adult) to a later condition (e.g. a multicellular animal or an aged adult) [goid 7275] [evidence IEA]; The process of formation of spermatozoa, including spermatocytogenesis and spermiogenesis [goid 7283] [evidence IEA]; The process whereby rel…	The action of a molecule that contributes to the structural integrity of a complex or assembly within or outside a cell [goid 5198] [pmid 10072582] [evidence TAS]	ODF84; MGC9034; ODF2/1; MGC111096; ODF2/2; FLJ44866
ILMN_1730698	ODF2	ODF2	NO	NM_002540.3	ODF2	9	Homo sapiens outer dense fiber of sperm tails 2 (ODF2), transcript variant 1, mRNA.	ODF84; MGC9034; MGC111096; ODF2/2; ODF2/1; FLJ44866	ODF2	6330368	Homo sapiens	RefSeq	ILMN_1195	NM_002540.3	NM_002540.3		4957	24430180	NM_002540.3	NP_002531.3	6330368	I	3475	CCCAAGGCTCCCTTCCCAAGCTCAGTGCAAACCTCTCACTCCCAAGTTTC	+	130302827-130302876	9q34.11b	A membrane-bounded organelle of eukaryotic cells in which chromosomes are housed and replicated. In most cells, the nucleus contains all of the cell's chromosomes except the organellar chromosomes, and is the site of RNA synthesis and processing. In some species, or in specialized cell types, RNA metabolism or DNA replication may be absent [goid 5634] [pmid 18029348] [evidence IDA]; All of the co…	The biological process whose specific outcome is the progression of a multicellular organism over time from an initial condition (e.g. a zygote or a young adult) to a later condition (e.g. a multicellular animal or an aged adult) [goid 7275] [evidence IEA]; The process of formation of spermatozoa, including spermatocytogenesis and spermiogenesis [goid 7283] [evidence IEA]; The process whereby rel…	The action of a molecule that contributes to the structural integrity of a complex or assembly within or outside a cell [goid 5198] [pmid 10072582] [evidence TAS]	ODF84; MGC9034; ODF2/1; MGC111096; ODF2/2; FLJ44866
ILMN_1702073	ODF2L	ODF2L	NO	NM_001007022.1	ODF2L	1	Homo sapiens outer dense fiber of sperm tails 2-like (ODF2L), transcript variant 2, mRNA.	MGC111060; RP5-977L11.1; KIAA1229; dJ977L11.1	ODF2L	6840026	Homo sapiens	RefSeq	ILMN_11030	NM_001007022.1	NM_001007022.1		57489	55749707	NM_001007022.1	NP_001007023.1	6840026	A	1605	GTGCAGACCAGGAACACACCATTAGGGAGCTTCAGGGCCAGGTTGATGGA	-	86820533-86820542:86822127-86822166	1p22.3c			Interacting selectively with a nucleotide, any compound consisting of a nucleoside that is esterified with (ortho)phosphate or an oligophosphate at any hydroxyl group on the ribose or deoxyribose moiety [goid 166] [evidence IEA]	MGC111060; dJ977L11.1; RP5-977L11.1; KIAA1229
ILMN_1800517	ODF2L	ODF2L	NO	NM_020729.1	ODF2L	1	Homo sapiens outer dense fiber of sperm tails 2-like (ODF2L), transcript variant 1, mRNA.	MGC111060; dJ977L11.1; RP5-977L11.1; KIAA1229	ODF2L	2900482	Homo sapiens	RefSeq	ILMN_18003	NM_020729.1	NM_020729.1		57489	55749695	NM_020729.1	NP_065780.1	2900482	I	488	GACTGAATTGGAAGCAACACTTAAGGAAGCGGAGTTGGTAACTCATTCTG	-	86851196-86851245	1p22.3c			Interacting selectively with a nucleotide, any compound consisting of a nucleoside that is esterified with (ortho)phosphate or an oligophosphate at any hydroxyl group on the ribose or deoxyribose moiety [goid 166] [evidence IEA]	MGC111060; dJ977L11.1; RP5-977L11.1; KIAA1229
ILMN_2325028	ODF2L	ODF2L	NO	NM_001007022.1	ODF2L	1	Homo sapiens outer dense fiber of sperm tails 2-like (ODF2L), transcript variant 2, mRNA.	MGC111060; RP5-977L11.1; KIAA1229; dJ977L11.1	ODF2L	730315	Homo sapiens	RefSeq	ILMN_11030	NM_001007022.1	NM_001007022.1		57489	55749707	NM_001007022.1	NP_001007023.1	730315	A	1835	GCAGAGTATACAGCATTGGCCAGACAACTGGAAGCTGCTTTAGAAGAAGG	-	86820222-86820271	1p22.3c			Interacting selectively with a nucleotide, any compound consisting of a nucleoside that is esterified with (ortho)phosphate or an oligophosphate at any hydroxyl group on the ribose or deoxyribose moiety [goid 166] [evidence IEA]	MGC111060; dJ977L11.1; RP5-977L11.1; KIAA1229
ILMN_3245811	ODF3	ODF3	NO	NM_053280.3	ODF3	11	Homo sapiens outer dense fiber of sperm tails 3 (ODF3), mRNA.	hSHIPPO; TISP50; SHIPPO1	ODF3	2760324	Homo sapiens	RefSeq	ILMN_27840	NM_053280.3	NM_053280.3		113746	31559770	NM_053280.3	NP_444510.2	2760324	S	968	AGGTGACCCTGACCAAGCCCTGCGCCCCAGTTGTCACCTTCGGCATCAAA	+	189508-189509:189944-189991	11p15.5d	Structure or material found in the flagella of mammalian sperm that surrounds each of the nine microtubule doublets, giving a 9 + 9 + 2 arrangement rather than the 9 + 2 pattern usually seen. These dense fibers are stiff and noncontractile [goid 1520] [evidence IEA]; All of the contents of a cell excluding the plasma membrane and nucleus, but including other subcellular structures [goid 5737] [ev…	The biological process whose specific outcome is the progression of a multicellular organism over time from an initial condition (e.g. a zygote or a young adult) to a later condition (e.g. a multicellular animal or an aged adult) [goid 7275] [evidence IEA]; The process of formation of spermatozoa, including spermatocytogenesis and spermiogenesis [goid 7283] [evidence IEA]; The process whereby rel…		hSHIPPO; TISP50; SHIPPO1
ILMN_1758008	ODF3L1	ODF3L1	NO	NM_175881.2	ODF3L1	15	Homo sapiens outer dense fiber of sperm tails 3-like 1 (ODF3L1), mRNA.	MGC48986	ODF3L1	4230402	Homo sapiens	RefSeq	ILMN_26152	NM_175881.3	NM_175881.3		161753	142369790	NM_175881.3	NP_787077.1	4230402	S	963	GCACAAGCCCCACATCCCTGCTTTCACCATGGGCATCAAGCACTCACTCC	+	73806852-73806901	15q24.2a				MGC48986
ILMN_1787831	ODF3L2	ODF3L2	NO	NM_182577.1	ODF3L2	19	Homo sapiens outer dense fiber of sperm tails 3-like 2 (ODF3L2), mRNA.	MGC129962; MGC129963; FLJ40059	ODF3L2	6330639	Homo sapiens	RefSeq	ILMN_17282	NM_182577.1	NM_182577.1		284451	32698983	NM_182577.1	NP_872383.1	6330639	S	1519	CCCCGAGGCCTGTGCCTTTCCCACTCCACCTTCTACAGTTGCTTAGCCAA	-	414381-414430	19p13.3j				MGC129962; MGC129963; FLJ40059
ILMN_1783656	ODF4	ODF4	NO	NM_153007.3	ODF4	17	Homo sapiens outer dense fiber of sperm tails 4 (ODF4), mRNA.	MGC138215; MGC138219; OPPO1	ODF4	1190201	Homo sapiens	RefSeq	ILMN_4357	NM_153007.3	NM_153007.3		146852	31559788	NM_153007.3	NP_694552.1	1190201	S	977	CCAAGTTCTGTCCATTCATCTGACCCCATCTCCTCATCCTCCCCCAGCCC	+	8189916-8189965	17p13.1c	Structure or material found in the flagella of mammalian sperm that surrounds each of the nine microtubule doublets, giving a 9 + 9 + 2 arrangement rather than the 9 + 2 pattern usually seen. These dense fibers are stiff and noncontractile [goid 1520] [evidence IEA]; A long, whiplike protrusion from the surface of a eukaryotic cell, whose undulations drive the cell through a liquid medium; simila…	The biological process whose specific outcome is the progression of a multicellular organism over time from an initial condition (e.g. a zygote or a young adult) to a later condition (e.g. a multicellular animal or an aged adult) [goid 7275] [evidence IEA]; The process of formation of spermatozoa, including spermatocytogenesis and spermiogenesis [goid 7283] [evidence IEA]; The process whereby rel…		MGC138215; MGC138219; OPPO1
ILMN_1759277	OIP5	OIP5	NO	NM_007280.1	OIP5	15	Homo sapiens Opa interacting protein 5 (OIP5), mRNA.	LINT-25; 5730547N13Rik; MIS18beta	OIP5	3180484	Homo sapiens	RefSeq	ILMN_18200	NM_007280.1	NM_007280.1		11339	24307928	NM_007280.1	NP_009211.1	3180484	S	724	CCTGACCAGTCCAAGCCAGAAAACTGATCCTGTACCAAAGCTTGAGTGTC	-	41601928-41601951:41601952-41601977	15q15.1c	The ordered and organized complex of DNA and protein that forms the chromosome [goid 785] [pmid 17284516] [evidence IDA]; The part of a cell or its extracellular environment in which a gene product is located. A gene product may be located in one or more parts of a cell and its location may be as specific as a particular macromolecular complex, that is, a stable, persistent association of macromo…	Any process that mediates interactions between a cell and its surroundings. Encompasses interactions such as signaling or attachment between one cell and another cell, between a cell and an extracellular matrix, or between a cell and any other aspect of its environment [goid 7154] [pmid 9466265] [evidence NAS]	Interacting selectively with any protein or protein complex (a complex of two or more proteins that may include other nonprotein molecules) [goid 5515] [pmid 9466265] [evidence TAS]	LINT-25; 5730547N13Rik; MIS18beta
ILMN_2196984	OIP5	OIP5	NO	NM_007280.1	OIP5	15	Homo sapiens Opa interacting protein 5 (OIP5), mRNA.	LINT-25; 5730547N13Rik; MIS18beta	OIP5	7000161	Homo sapiens	RefSeq	ILMN_18200	NM_007280.1	NM_007280.1		11339	24307928	NM_007280.1	NP_009211.1	7000161	S	1040	GATGCAGAGTCCCATGTGTCCTCTGATCTAAAGTTGCATGGTTGGTCTGA	-	41601612-41601661	15q15.1c	The ordered and organized complex of DNA and protein that forms the chromosome [goid 785] [pmid 17284516] [evidence IDA]; The part of a cell or its extracellular environment in which a gene product is located. A gene product may be located in one or more parts of a cell and its location may be as specific as a particular macromolecular complex, that is, a stable, persistent association of macromo…	Any process that mediates interactions between a cell and its surroundings. Encompasses interactions such as signaling or attachment between one cell and another cell, between a cell and an extracellular matrix, or between a cell and any other aspect of its environment [goid 7154] [pmid 9466265] [evidence NAS]	Interacting selectively with any protein or protein complex (a complex of two or more proteins that may include other nonprotein molecules) [goid 5515] [pmid 9466265] [evidence TAS]	LINT-25; 5730547N13Rik; MIS18beta
ILMN_1654980	OTOA	OTOA	NO	NM_170664.1	OTOA	16	Homo sapiens otoancorin (OTOA), transcript variant 2, mRNA.	MGC157747; MGC39813; DFNB22; FLJ32773	OTOA	3400204	Homo sapiens	RefSeq	ILMN_14487	NM_170664.1	NM_170664.1		146183	24638451	NM_170664.1	NP_733764.1	3400204	I	2	CCCATTCCTTGGTCTCGTCTGAGCAGTTAGGTTCCGCCTGTGGTTGCACA	+	21623786-21623835	16p12.2a	The space external to the outermost structure of a cell. For cells without external protective or external encapsulating structures this refers to space outside of the plasma membrane. This term covers the host cell environment outside an intracellular parasite [goid 5576] [evidence IEA]; A layer consisting mainly of proteins (especially collagen) and glycosaminoglycans (mostly as proteoglycans) …	The series of events required for an organism to receive an auditory stimulus, convert it to a molecular signal, and recognize and characterize the signal. Sonic stimuli are detected in the form of vibrations and are processed to form a sound [goid 7605] [evidence IEA]		MGC157747; MGC39813; DFNB22; FLJ32773
ILMN_1661862	OTOA	OTOA	NO	NM_144672.3	OTOA	16	Homo sapiens otoancorin (OTOA), transcript variant 1, mRNA.	MGC157747; MGC39813; DFNB22; FLJ32773	OTOA	5900615	Homo sapiens	RefSeq	ILMN_22157	NM_144672.3	NM_144672.3		146183	77404408	NM_144672.3	NP_653273.3	5900615	I	47	CTGAGCCATGGAGTGTCGAGTTATACAGTGCCAAATTCCAGGCAGGATTT	+	21597382-21597427:21597737-21597740	16p12.2a	The space external to the outermost structure of a cell. For cells without external protective or external encapsulating structures this refers to space outside of the plasma membrane. This term covers the host cell environment outside an intracellular parasite [goid 5576] [evidence IEA]; A layer consisting mainly of proteins (especially collagen) and glycosaminoglycans (mostly as proteoglycans) …	The series of events required for an organism to receive an auditory stimulus, convert it to a molecular signal, and recognize and characterize the signal. Sonic stimuli are detected in the form of vibrations and are processed to form a sound [goid 7605] [evidence IEA]		MGC157747; MGC39813; DFNB22; FLJ32773
ILMN_1779890	OTOA	OTOA	NO	NM_144672.3	OTOA	16	Homo sapiens otoancorin (OTOA), transcript variant 1, mRNA.	MGC157747; MGC39813; DFNB22; FLJ32773	OTOA	6660670	Homo sapiens	RefSeq	ILMN_22157	NM_144672.3	NM_144672.3		146183	77404408	NM_144672.3	NP_653273.3	6660670	A	2130	TACACGGCCTCAGAGACTGCCCAGACCTCAACCCTGAGCAAAAGGCTGCA	+	21647175-21647224	16p12.2a	The space external to the outermost structure of a cell. For cells without external protective or external encapsulating structures this refers to space outside of the plasma membrane. This term covers the host cell environment outside an intracellular parasite [goid 5576] [evidence IEA]; A layer consisting mainly of proteins (especially collagen) and glycosaminoglycans (mostly as proteoglycans) …	The series of events required for an organism to receive an auditory stimulus, convert it to a molecular signal, and recognize and characterize the signal. Sonic stimuli are detected in the form of vibrations and are processed to form a sound [goid 7605] [evidence IEA]		MGC157747; MGC39813; DFNB22; FLJ32773
ILMN_1778623	PAGE1	PAGE1	NO	NM_003785.3	PAGE1	X	Homo sapiens P antigen family, member 1 (prostate associated) (PAGE1), mRNA.	GAGEB1; GAGE-9; PAGE-1	PAGE1	7160735	Homo sapiens	RefSeq	ILMN_17330	NM_003785.3	NM_003785.3		8712	58761527	NM_003785.3	NP_003776.2	7160735	S	382	GGTGTGCCTGCGAAATGAAGAGCAGATGAAACTGCCCGCAGAAGGGCCAG	-	49454140-49454146:49455852-49455894	Xp11.23a	A membrane-bounded organelle of eukaryotic cells in which chromosomes are housed and replicated. In most cells, the nucleus contains all of the cell's chromosomes except the organellar chromosomes, and is the site of RNA synthesis and processing. In some species, or in specialized cell types, RNA metabolism or DNA replication may be absent [goid 5634] [pmid 18029348] [evidence IDA]; A small, dens…	A defense response that is mediated by cells [goid 6968] [pmid 9651357] [evidence TAS]		GAGEB1; GAGE-9; PAGE-1
ILMN_1724213	PAGE2	PAGE2	NO	NM_207339.1	PAGE2	X	Homo sapiens P antigen family, member 2 (prostate associated) (PAGE2), mRNA.	GAGEC2; GAGEE2; PAGE-2; MGC62094	PAGE2	1240195	Homo sapiens	RefSeq	ILMN_10075	NM_207339.2	NM_207339.2		203569	141803561	NM_207339.2	NP_997222.1	1240195	S	229	GCAGTGCCTGCTTTTCAAGGGCCTGACATGGAAGCTTTTCAACAGGAACT	+	55117031-55117043:55117765-55117801	Xp11.21a				GAGEE2; MGC62094
ILMN_1706140	PAGE2B	PAGE2B	NO	NM_001015038.1	PAGE2B	X	Homo sapiens P antigen family, member 2B (PAGE2B), mRNA.	GAGEE3	PAGE2B	4850528	Homo sapiens	RefSeq	ILMN_15659	NM_001015038.1	NM_001015038.1		389860	62632766	NM_001015038.1	NP_001015038.1	4850528	S	1	CTTTCCGCCATCTTGATTCTTTGTCACTGACCGAGACTCAGCCGTGGGAA	+	55101504-55101547:55102467-55102472	Xp11.21a				GAGEE3
ILMN_1733722	PAGE3	PAGE3	NO	NM_001017931.1	PAGE3	X	Homo sapiens P antigen family, member 3 (prostate associated) (PAGE3), mRNA.	PAGE-3; GAGED1	PAGE3	1470356	Homo sapiens	RefSeq	ILMN_8208	NM_001017931.1	NM_001017931.1		139793	62988343	NM_001017931.1	NP_001017931.1	1470356	S	361	CAAGACTCTAATCATCCAGTAGGGGCTGTGGTTGCCCAGGAGCTGCCCAG	-	55306500-55306517:55306978-55307009	Xp11.21a				PAGE-3; GAGED1
ILMN_1782754	PAGE4	PAGE4	NO	NM_007003.2	PAGE4	X	Homo sapiens P antigen family, member 4 (prostate associated) (PAGE4), mRNA.	GAGE-9; JM27; PAGE-4; PAGE-1; GAGEC1; FLJ35184	PAGE4	5560754	Homo sapiens	RefSeq	ILMN_14790	NM_007003.2	NM_007003.2		9506	19747284	NM_007003.2	NP_008934.1	5560754	S	266	TGCCAGGAAATGGATCTGGAAAAGACTCGGAGTGAGCGTGGAGATGGCTC	+	49483886-49483935	Xp11.23a	The part of a cell or its extracellular environment in which a gene product is located. A gene product may be located in one or more parts of a cell and its location may be as specific as a particular macromolecular complex, that is, a stable, persistent association of macromolecules that function together [goid 5575] [evidence ND ]	Any process specifically pertinent to the functioning of integrated living units: cells, tissues, organs, and organisms. A process is a collection of molecular events with a defined beginning and end [goid 8150] [evidence ND ]	Elemental activities, such as catalysis or binding, describing the actions of a gene product at the molecular level. A given gene product may exhibit one or more molecular functions [goid 3674] [evidence ND ]	GAGE-9; JM27; PAGE-4; PAGE-1; GAGEC1; FLJ35184
ILMN_1695992	PAGE5	PAGE5	NO	NM_130467.3	PAGE5	X	Homo sapiens P antigen family, member 5 (prostate associated) (PAGE5), transcript variant 1, mRNA.	GAGEE1; PAGE-5	PAGE5	2850594	Homo sapiens	RefSeq	ILMN_18374	NM_130467.3	NM_130467.3		90737	61743934	NM_130467.3	NP_569734.2	2850594	I	189	TGGCTTTGAGGGAAAAGGGCCTCGCGGTGGTCCTCCGCCTTCCCCCAGGT	+	55246979-55247028	Xp11.21a				GAGEE1; PAGE-5
ILMN_1744656	PAGE5	PAGE5	NO	NM_130467.3	PAGE5	X	Homo sapiens P antigen family, member 5 (prostate associated) (PAGE5), transcript variant 1, mRNA.	GAGEE1; PAGE-5	PAGE5	5900608	Homo sapiens	RefSeq	ILMN_18374	NM_130467.3	NM_130467.3		90737	61743934	NM_130467.3	NP_569734.2	5900608	A	3	GAGCTCTGCAAGGAGAGGTTGTGTCTTCGTTCTTTCCGCCATCTTCGTTC	+	55246793-55246842	Xp11.21a				GAGEE1; PAGE-5
ILMN_2363141	PAGE5	PAGE5	NO	NM_130467.3	PAGE5	X	Homo sapiens P antigen family, member 5 (prostate associated) (PAGE5), transcript variant 1, mRNA.	GAGEE1; PAGE-5	PAGE5	2650075	Homo sapiens	RefSeq	ILMN_18374	NM_130467.3	NM_130467.3		90737	61743934	NM_130467.3	NP_569734.2	2650075	A	576	GGGACTCTGCCCACTTTTGATCCCACTAAAGTGCTGGAAGCAGGTGAAGG	+	55249137-55249179:55250420-55250426	Xp11.21a				GAGEE1; PAGE-5
ILMN_1797295	PASD1	PASD1	NO	NM_173493.1	PASD1	X	Homo sapiens PAS domain containing 1 (PASD1), mRNA.		PASD1	5700187	Homo sapiens	RefSeq	ILMN_15156	NM_173493.1	NM_173493.1		139135	27735094	NM_173493.1	NP_775764.1	5700187	S	2832	GTCTGCCCCGCCCAGCTTTGCATATCCATGTTCTACCACAGGAAGGTGGC	+	150595536-150595585	Xq28d	A membrane-bounded organelle of eukaryotic cells in which chromosomes are housed and replicated. In most cells, the nucleus contains all of the cell's chromosomes except the organellar chromosomes, and is the site of RNA synthesis and processing. In some species, or in specialized cell types, RNA metabolism or DNA replication may be absent [goid 5634] [evidence IEA]	The cascade of processes by which a signal interacts with a receptor, causing a change in the level or activity of a second messenger or other downstream target, and ultimately effecting a change in the functioning of the cell [goid 7165] [evidence IEA]	Mediates the transfer of a signal from the outside to the inside of a cell by means other than the introduction of the signal molecule itself into the cell [goid 4871] [evidence IEA]
ILMN_1673673	PBK	PBK	NO	NM_018492.2	PBK	8	Homo sapiens PDZ binding kinase (PBK), mRNA.	Nori-3; SPK; FLJ14385; TOPK	PBK	3420554	Homo sapiens	RefSeq	ILMN_174875	NM_018492.2	NM_018492.2		55872	18490990	NM_018492.2	NP_060962.2	3420554	S	1664	GACTCTGGTTACAGATTGTCTTGATCTCTTGGATCTCCTCAGATCTTTGG	-	27723197-27723246	8p21.1e	The part of a cell or its extracellular environment in which a gene product is located. A gene product may be located in one or more parts of a cell and its location may be as specific as a particular macromolecular complex, that is, a stable, persistent association of macromolecules that function together [goid 5575] [evidence ND ]	The process of introducing a phosphate group on to a protein [goid 6468] [evidence NAS]; Progression through mitosis, the division of the eukaryotic cell nucleus to produce two daughter nuclei that, usually, contain the identical chromosome complement to their mother [goid 7067] [pmid 10779557] [evidence NAS]	Interacting selectively with a nucleotide, any compound consisting of a nucleoside that is esterified with (ortho)phosphate or an oligophosphate at any hydroxyl group on the ribose or deoxyribose moiety [goid 166] [evidence IEA]; Catalysis of the reaction: ATP + a protein serine/threonine = ADP + protein serine/threonine phosphate [goid 4674] [pmid 10779557] [evidence TAS]; Interacting selectivel…	Nori-3; SPK; FLJ14385; TOPK
ILMN_1701220	PIWIL1	PIWIL1	NO	NM_004764.3	PIWIL1	12	Homo sapiens piwi-like 1 (Drosophila) (PIWIL1), mRNA.	HIWI; PIWI	PIWIL1	4290612	Homo sapiens	RefSeq	ILMN_6975	NM_004764.3	NM_004764.3		9271	66346724	NM_004764.3	NP_004755.2	4290612	S	3089	AGAGGCGTAAAGTAGGATGCTCACTACAACCATAGGTGGGGTTTCAGCTC	+	129422509-129422558	12q24.33a	All of the contents of a cell excluding the plasma membrane and nucleus, but including other subcellular structures [goid 5737] [evidence IEA]; A collection of membranous structures involved in transport within the cell. The main components of the endomembrane system are endoplasmic reticulum, Golgi bodies, vesicles, cell membrane and nuclear envelope. Members of the endomembrane system pass mate…	The biological process whose specific outcome is the progression of a multicellular organism over time from an initial condition (e.g. a zygote or a young adult) to a later condition (e.g. a multicellular animal or an aged adult) [goid 7275] [evidence IEA]; The process of formation of spermatozoa, including spermatocytogenesis and spermiogenesis [goid 7283] [evidence IEA]; The process whereby rel…	Interacting selectively with single-stranded RNA [goid 3727] [evidence IEA]; Interacting selectively with any protein or protein complex (a complex of two or more proteins that may include other nonprotein molecules) [goid 5515] [evidence IEA]; Interacting selectively with any protein or protein complex (a complex of two or more proteins that may include other nonprotein molecules) [goid 5515] [p…	HIWI; PIWI
ILMN_1706938	PIWIL2	PIWIL2	NO	XM_938848.1	PIWIL2		PREDICTED: Homo sapiens piwi-like 2 (Drosophila) (PIWIL2), mRNA.		PIWIL2	7210470	Homo sapiens	RefSeq	ILMN_172692	XM_001127830.1	XM_001127830.1		55124	113420303	XM_001127830.1	XP_001127830.1	7210470	I	2164	GTCAGTAGAGCTGACAGTACTTTGGGAGGCCAAGCCTGGGCAACAGACAT			8p21.3a	All of the contents of a cell excluding the plasma membrane and nucleus, but including other subcellular structures [goid 5737] [evidence IEA]	Progression through prophase of meiosis I; divided into several stages [goid 7128] [evidence IEA]; The biological process whose specific outcome is the progression of a multicellular organism over time from an initial condition (e.g. a zygote or a young adult) to a later condition (e.g. a multicellular animal or an aged adult) [goid 7275] [evidence IEA]; The process of formation of spermatozoa, i…	Interacting selectively with any nucleic acid [goid 3676] [evidence IEA]; Interacting selectively with any protein or protein complex (a complex of two or more proteins that may include other nonprotein molecules) [goid 5515] [evidence IEA]
ILMN_1711818	PIWIL2	PIWIL2	NO	NM_018068.2	PIWIL2	8	Homo sapiens piwi-like 2 (Drosophila) (PIWIL2), mRNA.	HILI; mili; FLJ10351; PIWIL1L; MGC133049	PIWIL2	6480424	Homo sapiens	RefSeq	ILMN_26555	NM_018068.2	NM_018068.2		55124	24431984	NM_018068.2	NP_060538.2	6480424	A	3048	GGCTGGTGAGAAGAAAGGCGGCCTCAGAACTCAGCTGTGACTCTTGCAGA	+	22268982-22269031	8p21.3a	All of the contents of a cell excluding the plasma membrane and nucleus, but including other subcellular structures [goid 5737] [evidence IEA]	Progression through prophase of meiosis I; divided into several stages [goid 7128] [evidence IEA]; The biological process whose specific outcome is the progression of a multicellular organism over time from an initial condition (e.g. a zygote or a young adult) to a later condition (e.g. a multicellular animal or an aged adult) [goid 7275] [evidence IEA]; The process of formation of spermatozoa, i…	Interacting selectively with any nucleic acid [goid 3676] [evidence IEA]; Interacting selectively with any protein or protein complex (a complex of two or more proteins that may include other nonprotein molecules) [goid 5515] [evidence IEA]	HILI; mili; FLJ10351; PIWIL1L; MGC133049
ILMN_1755350	PIWIL2	PIWIL2	NO	XM_938848.1	PIWIL2	8	Homo sapiens piwi-like 2 (Drosophila) (PIWIL2), mRNA.	HILI; mili; FLJ10351; PIWIL1L; MGC133049	PIWIL2	6130376	Homo sapiens	RefSeq	ILMN_26555	NM_018068.2	NM_018068.2		55124	24431984	NM_018068.2	NP_060538.2	6130376	A	3228	GGCCTTGTTGCCTGTGTAGAGCAAGTTACGGTGGTACTGCCACTCTGCAG	+	22269162-22269211	8p21.3a	All of the contents of a cell excluding the plasma membrane and nucleus, but including other subcellular structures [goid 5737] [evidence IEA]	Progression through prophase of meiosis I; divided into several stages [goid 7128] [evidence IEA]; The biological process whose specific outcome is the progression of a multicellular organism over time from an initial condition (e.g. a zygote or a young adult) to a later condition (e.g. a multicellular animal or an aged adult) [goid 7275] [evidence IEA]; The process of formation of spermatozoa, i…	Interacting selectively with any nucleic acid [goid 3676] [evidence IEA]; Interacting selectively with any protein or protein complex (a complex of two or more proteins that may include other nonprotein molecules) [goid 5515] [evidence IEA]
ILMN_1754207	PLAC1	PLAC1	NO	NM_021796.3	PLAC1	X	Homo sapiens placenta-specific 1 (PLAC1), mRNA.		PLAC1	1050609	Homo sapiens	RefSeq	ILMN_24438	NM_021796.3	NM_021796.3		10761	54792738	NM_021796.3	NP_068568.1	1050609	S	790	CAGTGAAGAAGAGCATACCCAGGTCCCTTGTCACCAAGCAGGGGCTCAGG	-	133700159-133700208	Xq26.3a	The space external to the outermost structure of a cell. For cells without external protective or external encapsulating structures this refers to space outside of the plasma membrane. This term covers the host cell environment outside an intracellular parasite [goid 5576] [evidence IEA]	The process whose specific outcome is the progression of the placenta over time, from its formation to the mature structure. The placenta is an organ of metabolic interchange between fetus and mother, partly of embryonic origin and partly of maternal origin [goid 1890] [pmid 10995572] [evidence IEP]; The biological process whose specific outcome is the progression of a multicellular organism over…	Elemental activities, such as catalysis or binding, describing the actions of a gene product at the molecular level. A given gene product may exhibit one or more molecular functions [goid 3674] [evidence ND ]
ILMN_1671474	POTEA	POTEA	NO	NM_001005365.2	POTEA	8	Homo sapiens POTE ankyrin domain family, member A (POTEA), transcript variant 1, mRNA.	POTE8; POTE-8	POTEA	6380561	Homo sapiens	RefSeq	ILMN_28840	NM_001002920.1	NM_001002920.1		340441	50897293	NM_001002920.1	NP_001002920.1	6380561	A	1144	AGTGGATAACCTTGATGACATAACATGGCCATCAGAAATAGCGTCAGAGG	+	43197350-43197399	8p11.1b				POTE8; POTE-8
ILMN_2321282	POTEA	POTEA	NO	NM_001005365.2	POTEA	8	Homo sapiens POTE ankyrin domain family, member A (POTEA), transcript variant 2, mRNA.	POTE8; POTE-8	POTEA	60091	Homo sapiens	RefSeq	ILMN_2229	NM_001005365.2	NM_001005365.2		340441	53828702	NM_001005365.2	NP_001005365.2	60091	A	1574	GCTCCTCAGAAAGGTGAATGTGAGCAAGAACGCTACAGTTCGAGTGAAGA	+	43212072-43212115:43216186-43216191	8p11.1b				POTE8; POTE-8
ILMN_3225545	POTEA	POTEA	NO	NM_001005365.2	POTEA	8	Homo sapiens POTE ankyrin domain family, member A (POTEA), transcript variant 2, mRNA.	POTE8; POTE-8	POTEA	2100414	Homo sapiens	RefSeq	ILMN_2229	NM_001005365.2	NM_001005365.2		340441	53828702	NM_001005365.2	NP_001005365.2	2100414	A	1927	ATTGAATGAGGAAGCACTAACAAAAGCAGTAGTTCAGTACAGTGGACAGC	+	43218279-43218328	8p11.1b				POTE8; POTE-8
ILMN_1772582	POTEB	POTEB	NO	NM_207355.2	POTEB	15	Homo sapiens POTE ankyrin domain family, member B (POTEB), mRNA.	MGC119371; MGC119373	POTEB	7570255	Homo sapiens	RefSeq	ILMN_19974	NM_207355.2	NM_207355.2		339010	52856429	NM_207355.2	NP_997238.2	7570255	S	1676	GCCAGTGCTGGCAATGGTGATGATGGATTAATTCCACAAAGGAAGAGCAG	-	22053786-22053835	15q11.2a				MGC119371; MGC119373
ILMN_3242275	POTEB	POTEB	NO	NM_207355.2	POTEB	15	Homo sapiens POTE ankyrin domain family, member B (POTEB), mRNA.	MGC119371; MGC119373	POTEB	6900685	Homo sapiens	RefSeq	ILMN_19974	NM_207355.2	NM_207355.2		339010	52856429	NM_207355.2	NP_997238.2	6900685	S	1748	CCTGACACTGAGAATGAAGAGTATCACAGTGACGAACAAAATGATACCCA	-	22052076-22052084:22053723-22053763	15q11.2a				MGC119371; MGC119373
ILMN_3239866	POTEC	POTEC	NO	NM_001137671.1	POTEC	18	Homo sapiens POTE ankyrin domain family, member C (POTEC), mRNA.		POTEC	290242	Homo sapiens	RefSeq	ILMN_370638	NM_001137671.1	NM_001137671.1		388468	212549545	NM_001137671.1	NP_001131143.1	290242	S	2023	GCGTGAAAACAGCATGTTGCAGGAAGAAATTGCCATGCTAATTTCTGGAG	-	14511907-14511956	18p11.21b
ILMN_3241159	POTED	POTED	NO	NM_174981.3	POTED	21	Homo sapiens POTE ankyrin domain family, member D (POTED), mRNA.	POTE-21; ANKRD21; POTE21; POTE	POTED	6350132	Homo sapiens	RefSeq	ILMN_14441	NM_174981.3	NM_174981.3		317754	153792283	NM_174981.3	NP_778146.2	6350132	S	1549	GCAGATAGAAGTGGCTGAACAGAAAATGAATTCTGAGCTTTCTCTTAGTC	+	13933794-13933830:13935537-13935549	21q11.2b				POTE-21; POTE21; POTE
ILMN_3242016	POTEE	POTEE	NO	NM_001083538.1	POTEE	2	Homo sapiens POTE ankyrin domain family, member E (POTEE), mRNA.	POTE-2; POTE2; A26C1	POTEE	3190010	Homo sapiens	RefSeq	ILMN_308339	NM_001083538.1	NM_001083538.1		445582	134133225	NM_001083538.1	NP_001077007.1	3190010	S	2158	TGATGATACCGCCGTGCTCGTCATTGACAACGGCTCTGGCATGTGCAAGG	+	131737604-131737653	2q21.1d				POTE-2; POTE2; A26C1
ILMN_3242191	POTEG	POTEG	NO	NM_001005356.1	POTEG	14	Homo sapiens POTE ankyrin domain family, member G (POTEG), transcript variant POTE-14A, mRNA.	POTE-14; ACTBL1; POTE22; POTE14	POTEG	6860014	Homo sapiens	RefSeq	ILMN_19738	NM_001005356.1	NM_001005356.1		404785	52856433	NM_001005356.1	NP_001005356.1	6860014	S	669	AGAGGACAGCTCTGACAAAGGCCGTACAATGCCGGGAAGATGAATGTGCG	+	18628812-18628831:18628991-18629020	14q11.1d				POTE-14; ACTBL1; POTE22; POTE14
ILMN_3240795	POTEH	POTEH	NO	NM_001136213.1	POTEH	22	Homo sapiens POTE ankyrin domain family, member H (POTEH), mRNA.		POTEH	3290541	Homo sapiens	RefSeq	ILMN_370784	NM_001136213.1	NM_001136213.1		23784	209977002	NM_001136213.1	NP_001129685.1	3290541	S	1444	GGGATTCCCAGAAAACCTGACTAACGGTGCCACTGCTGACAATGGTGATG	-	16267007-16267056	22q11.1c
ILMN_1700031	PRAME	PRAME	NO	NM_206956.1	PRAME	22	Homo sapiens preferentially expressed antigen in melanoma (PRAME), transcript variant 4, mRNA.	MAPE; OIP4	PRAME	4480301	Homo sapiens	RefSeq	ILMN_24135	NM_206955.1	NM_206955.1		23532	46249370	NM_206955.1	NP_996838.1	4480301	A	1777	TGGGGACAGAACCTTCTATGACCCGGAGCCCATCCTGTGCCCCTGTTTCA	-	22890499-22890548	22q11.22b			Interacting selectively with any protein or protein complex (a complex of two or more proteins that may include other nonprotein molecules) [goid 5515] [pmid 14667819] [evidence IPI]	MAPE; OIP4
ILMN_1740744	PRAME	PRAME	NO	NM_206953.1	PRAME	22	Homo sapiens preferentially expressed antigen in melanoma (PRAME), transcript variant 2, mRNA.	MAPE; OIP4	PRAME	2570603	Homo sapiens	RefSeq	ILMN_8154	NM_206953.1	NM_206953.1		23532	46249366	NM_206953.1	NP_996836.1	2570603	I	636	GGAGCCAGAGATTTGCACTGAAAGGGCGGGATTGAGTCGCCAGTTGTCAG	-	22899430-22899479	22q11.22b			Interacting selectively with any protein or protein complex (a complex of two or more proteins that may include other nonprotein molecules) [goid 5515] [pmid 14667819] [evidence IPI]	MAPE; OIP4
ILMN_2306033	PRAME	PRAME	NO	NM_206955.1	PRAME	22	Homo sapiens preferentially expressed antigen in melanoma (PRAME), transcript variant 4, mRNA.	MAPE; OIP4	PRAME	2690519	Homo sapiens	RefSeq	ILMN_24135	NM_206955.1	NM_206955.1		23532	46249370	NM_206955.1	NP_996838.1	2690519	A	1615	GACCCACGTGCTGTATCCTGTCCCCCTGGAGAGTTATGAGGACATCCATG	-	22890661-22890710	22q11.22b			Interacting selectively with any protein or protein complex (a complex of two or more proteins that may include other nonprotein molecules) [goid 5515] [pmid 14667819] [evidence IPI]	MAPE; OIP4
ILMN_1652670	PRAMEF1	PRAMEF1	NO	NM_023013.1	PRAMEF1	1	Homo sapiens PRAME family member 1 (PRAMEF1), mRNA.	dJ1198H6.1; RP5-845O24.1	PRAMEF1	4290639	Homo sapiens	RefSeq	ILMN_27897	NM_023013.1	NM_023013.1		65121	12738830	NM_023013.1	NP_075389.1	4290639	S	608	CAGTGGGTTTACCAAAGGAGAGGTTTAGTACACCTGTGCTGTAGTAAGCT	+	12776868-12776917	1p36.21d				dJ1198H6.1; RP5-845O24.1
ILMN_1709731	PRAMEF1	PRAMEF1	NO	NM_023014.1	PRAMEF1	1	Homo sapiens PRAME family member 1 (PRAMEF1), mRNA.	dJ1198H6.1; RP5-845O24.1	PRAMEF1	3290154	Homo sapiens	RefSeq	ILMN_27897	NM_023013.1	NM_023013.1		65121	12738830	NM_023013.1	NP_075389.1	3290154	I	1069	AAAGCATCTGAATCTCAGCTACGTGCTGCTGTTCCGCATCAGTCTTGAAC	+	12778273-12778322	1p36.21d				FLJ43580; RP5-845O24.1; DJ845O24.3
ILMN_2112551	PRAMEF1	PRAMEF1	NO	NM_023013.1	PRAMEF1	1	Homo sapiens PRAME family member 1 (PRAMEF1), mRNA.	dJ1198H6.1; RP5-845O24.1	PRAMEF1	6650730	Homo sapiens	RefSeq	ILMN_27897	NM_023013.1	NM_023013.1		65121	12738830	NM_023013.1	NP_075389.1	6650730	S	825	GGTGCCATCATTACACGTCAGATAATGAACTCCAAGGACGGTTAGTTGCC	+	12777085-12777134	1p36.21d				dJ1198H6.1; RP5-845O24.1
ILMN_3226405	PRAMEF11	PRAMEF11	NO	XM_001714837.1	PRAMEF11	1	PREDICTED: Homo sapiens PRAME family member 11 (PRAMEF11), mRNA.		PRAMEF11	770114	Homo sapiens	RefSeq	ILMN_345608	XM_001714837.1	XM_001714837.1		440560	169161236	XM_001714837.1	XP_001714889.1	770114	A	1420	AGCTGATGAAGAAAGTGAGGCACTTAAGGCACCCCAAGAGGATCTTGTTC	-	12807458-12807507	1p36.21d
ILMN_3303518	PRAMEF11	PRAMEF11	NO	XM_001714028.1	PRAMEF11		PREDICTED: Homo sapiens PRAME family member 11 (PRAMEF11), mRNA.		PRAMEF11	290482	Homo sapiens	RefSeq	ILMN_346618	XM_001714028.1	XM_001714028.1		440560	169162467	XM_001714028.1	XP_001714080.1	290482	M	540	ACGGCAGCCCTTGACTGTGTTTGTAGAACTTTGGCTCAAGAACAGGACTC			1p36.21d
ILMN_1675543	PRM1	PRM1	NO	NM_002761.1	PRM1	16	Homo sapiens protamine 1 (PRM1), mRNA.	P1	PRM1	4010471	Homo sapiens	RefSeq	ILMN_25311	NM_002761.2	NM_002761.2		5619	121582462	NM_002761.2	NP_002752.1	4010471	S	117	GTCGCAGCCAGAGCCGGAGCAGATATTACCGCCAGAGACAAAGAAGTCGC	-	11375026-11375075	16p13.13c	A complex comprised of DNA wound around a multisubunit core and associated proteins, which forms the primary packing unit of DNA into higher order structures [goid 786] [evidence IEA]; A membrane-bounded organelle of eukaryotic cells in which chromosomes are housed and replicated. In most cells, the nucleus contains all of the cell's chromosomes except the organellar chromosomes, and is the site …	Any process by which DNA and associated proteins are formed into a compact, orderly structure [goid 6323] [pmid 2081589] [evidence TAS]; A process that is carried out at the cellular level which results in the formation, arrangement of constituent parts, or disassembly of the nucleus [goid 6997] [evidence IEA]; The cell cycle process whereby chromatin structure is compacted prior to mitosis in eu…	Interacting selectively with DNA (deoxyribonucleic acid) [goid 3677] [pmid 2081589] [evidence TAS]	P1
ILMN_1681772	PRM2	PRM2	NO	NM_002762.2	PRM2	16	Homo sapiens protamine 2 (PRM2), mRNA.	FLJ27447	PRM2	3780224	Homo sapiens	RefSeq	ILMN_2715	NM_002762.2	NM_002762.2		5620	68989266	NM_002762.2	NP_002753.2	3780224	S	474	CCAAGTGAGGCCATAGCAATTCCCCTACATCAAATGCTCAAGCCCCCAGC	-	11369652-11369701	16p13.13c	A complex comprised of DNA wound around a multisubunit core and associated proteins, which forms the primary packing unit of DNA into higher order structures [goid 786] [evidence IEA]; A membrane-bounded organelle of eukaryotic cells in which chromosomes are housed and replicated. In most cells, the nucleus contains all of the cell's chromosomes except the organellar chromosomes, and is the site …	Any process by which DNA and associated proteins are formed into a compact, orderly structure [goid 6323] [pmid 2081589] [evidence TAS]; A process that is carried out at the cellular level which results in the formation, arrangement of constituent parts, or disassembly of the nucleus [goid 6997] [evidence IEA]; The cell cycle process whereby chromatin structure is compacted prior to mitosis in eu…	Interacting selectively with DNA (deoxyribonucleic acid) [goid 3677] [pmid 2081589] [evidence TAS]	FLJ27447
ILMN_1775615	PRSS50	TSP50	YES	NM_013270.2	TSP50	3	Homo sapiens testes-specific protease 50 (TSP50), mRNA.		TSP50	460450	Homo sapiens	RefSeq	ILMN_13617	NM_013270.3	NM_013270.3		29122	142363309	NM_013270.3	NP_037402.1	460450	S	1079	CTACAGGTCTCCTCCTACCAACACTGGATCTGGGACTGCCTCAACGGGCA	-	46728819-46728868	3p21.31h		The hydrolysis of a peptide bond or bonds within a protein [goid 6508] [evidence IEA]	Catalysis of a biochemical reaction at physiological temperatures. In biologically catalyzed reactions, the reactants are known as substrates, and the catalysts are naturally occurring macromolecular substances known as enzymes. Enzymes possess specific binding sites for substrates, and are usually composed wholly or largely of protein, but RNA that has catalytic activity (ribozyme) is often also…
ILMN_2400360	PRSS54	KLKBL4	YES	NM_001080492.1	KLKBL4	16	Homo sapiens plasma kallikrein-like protein 4 (KLKBL4), mRNA.	FLJ25339	KLKBL4	830020	Homo sapiens	RefSeq	ILMN_165738	NM_001080492.1	NM_001080492.1		221191	122937419	NM_001080492.1	NP_001073961.1	830020	A	998	GAAGACAGAATGCGGCAGCCACACGAAAGAGGAAACCAAGACTGCCTGCT	-	58318495-58318544	16q21a	The space external to the outermost structure of a cell. For cells without external protective or external encapsulating structures this refers to space outside of the plasma membrane. This term covers the host cell environment outside an intracellular parasite [goid 5576] [evidence IEA]	The hydrolysis of a peptide bond or bonds within a protein [goid 6508] [evidence IEA]	Catalysis of a biochemical reaction at physiological temperatures. In biologically catalyzed reactions, the reactants are known as substrates, and the catalysts are naturally occurring macromolecular substances known as enzymes. Enzymes possess specific binding sites for substrates, and are usually composed wholly or largely of protein, but RNA that has catalytic activity (ribozyme) is often also…	FLJ25339
ILMN_1806464	PRSS55	T-SP1	YES	NM_198464.1	T-SP1	8	Homo sapiens tryptophan/serine protease (T-SP1), mRNA.		T-SP1	3850463	Homo sapiens	RefSeq	ILMN_29889	NM_198464.2	NM_198464.2		203074	110578662	NM_198464.2	NP_940866.2	3850463	S	735	TGAGAGCTATGATGCCTGCAAGGGTGACAGTGGGGGGCCTCTGGTCTGCA	+	10390537-10390558:10395986-10396013	8p23.1c
ILMN_1680945	PTPN20	PTPN20	NO	XM_937744.1	PTPN20		PREDICTED: Homo sapiens protein tyrosine phosphatase, non-receptor type 20 (PTPN20), mRNA.		PTPN20	3850647	Homo sapiens	RefSeq	ILMN_137356	XM_937744.1	XM_937744.1		26095	89031953	XM_937744.1	XP_942837.1	3850647	S	111	GCATCCTGAGGTGGCCAAGGGCAGTGGTGCTCCAGATGTTTCTGTTTCTG			10q11.22c			Combining with an extracellular or intracellular messenger to initiate a change in cell activity [goid 4872] [evidence IEA]
ILMN_1664009	RBM46	RBM46	NO	NM_144979.2	RBM46	4	Homo sapiens RNA binding motif protein 46 (RBM46), mRNA.	MGC27016	RBM46	5310477	Homo sapiens	RefSeq	ILMN_26780	NM_144979.2	NM_144979.2		166863	34222176	NM_144979.2	NP_659416.1	5310477	S	1650	GCAGCCATGTTGGACAGCGGCTATGTATCTCCAATCAGGCCTCCTTCTTC	+	155968617-155968666	4q32.1a			Interacting selectively with a nucleotide, any compound consisting of a nucleoside that is esterified with (ortho)phosphate or an oligophosphate at any hydroxyl group on the ribose or deoxyribose moiety [goid 166] [evidence IEA]; Interacting selectively with an RNA molecule or a portion thereof [goid 3723] [evidence IEA]	MGC27016
ILMN_2046943	RBM46	RBM46	NO	NM_144979.2	RBM46	4	Homo sapiens RNA binding motif protein 46 (RBM46), mRNA.	MGC27016	RBM46	5360047	Homo sapiens	RefSeq	ILMN_26780	NM_144979.2	NM_144979.2		166863	34222176	NM_144979.2	NP_659416.1	5360047	S	2096	GGATCACTATCTGTACTGGAGATTAGAACAATTATATGACCAGAAGCATC	+	155969063-155969112	4q32.1a			Interacting selectively with a nucleotide, any compound consisting of a nucleoside that is esterified with (ortho)phosphate or an oligophosphate at any hydroxyl group on the ribose or deoxyribose moiety [goid 166] [evidence IEA]; Interacting selectively with an RNA molecule or a portion thereof [goid 3723] [evidence IEA]	MGC27016
ILMN_2145490	REC114	C15orf60	YES	NM_001042367.1	C15ORF60	15	Homo sapiens chromosome 15 open reading frame 60 (C15orf60), mRNA.	FLJ44083; FLJ27520; FLJ36860	C15ORF60	4730367	Homo sapiens	RefSeq	ILMN_171014	NM_001042367.1	NM_001042367.1		283677	108796648	NM_001042367.1	NP_001035826.1	4730367	S	588	CAGAACAACAGCAAGTGTGTGTAACAGCGGGCACAGGCGCTCCAGACGGA	+	71635709-71635758	15q24.1a				FLJ27520; FLJ44083; FLJ36860
ILMN_1669983	RGS22	RGS22	NO	NM_015668.2	RGS22	8	Homo sapiens regulator of G-protein signalling 22 (RGS22), mRNA.	MGC102908; DKFZP434I092; PRTD-NY2; FLJ40080	RGS22	6760561	Homo sapiens	RefSeq	ILMN_21252	NM_015668.2	NM_015668.2		26166	63025192	NM_015668.2	NP_056483.2	6760561	S	3780	CCTAGGCCTCCAACCATATGGCCGACAGCCAACCTGGTGCTACTCAAAGT	-	101044363-101044382:101046739-101046768	8q22.2b		Any process that stops, prevents or reduces the frequency, rate or extent of signal transduction [goid 9968] [evidence IEA]	Mediates the transfer of a signal from the outside to the inside of a cell by means other than the introduction of the signal molecule itself into the cell [goid 4871] [evidence IEA]; Mediates the transfer of a signal from the outside to the inside of a cell by means other than the introduction of the signal molecule itself into the cell [goid 4871] [evidence IEA]	MGC102908; DKFZP434I092; PRTD-NY2; FLJ40080
ILMN_3243976	RHOXF2	RHOXF2	NO	NM_032498.1	RHOXF2	X	Homo sapiens Rhox homeobox family, member 2 (RHOXF2), mRNA.	PEPP2; PEPP-2; THG1	RHOXF2	10730	Homo sapiens	RefSeq	ILMN_12239	NM_032498.1	NM_032498.1		84528	14249118	NM_032498.1	NP_115887.1	10730	S	458	TGGGAAGGAGACCTCGAGGGCACCAGCGGCAGCGATGGCAACGTTGAGGA	+	119177137-119177186	Xq24d	A membrane-bounded organelle of eukaryotic cells in which chromosomes are housed and replicated. In most cells, the nucleus contains all of the cell's chromosomes except the organellar chromosomes, and is the site of RNA synthesis and processing. In some species, or in specialized cell types, RNA metabolism or DNA replication may be absent [goid 5634] [evidence IEA]	Any process that modulates the frequency, rate or extent of DNA-dependent transcription [goid 6355] [evidence IEA]	The function of binding to a specific DNA sequence in order to modulate transcription. The transcription factor may or may not also interact selectively with a protein or macromolecular complex [goid 3700] [evidence IEA]; Interacting selectively with any protein or protein complex (a complex of two or more proteins that may include other nonprotein molecules) [goid 5515] [pmid 15231747] [evidence…	PEPP2; PEPP-2; THG1
ILMN_1689621	RNF17	RNF17	NO	NM_019038.2	RNF17	13	Homo sapiens ring finger protein 17 (RNF17), mRNA.	TDRD4; FLJ11045; SPATA23; Mmip-2	RNF17	1690070	Homo sapiens	RefSeq	ILMN_168165	NM_031277.2	NM_031277.2		56163	94421470	NM_031277.2	NP_112567.2	1690070	S	4736	TTGTCCCAAATGGAGCATGGAGGCACTGTGGGCTATGATAGACTGTCTTC	+	24349246-24349295	13q12.12b	A membrane-bounded organelle of eukaryotic cells in which chromosomes are housed and replicated. In most cells, the nucleus contains all of the cell's chromosomes except the organellar chromosomes, and is the site of RNA synthesis and processing. In some species, or in specialized cell types, RNA metabolism or DNA replication may be absent [goid 5634] [evidence IEA]; All of the contents of a cell…	The biological process whose specific outcome is the progression of a multicellular organism over time from an initial condition (e.g. a zygote or a young adult) to a later condition (e.g. a multicellular animal or an aged adult) [goid 7275] [evidence IEA]; The process of formation of spermatozoa, including spermatocytogenesis and spermiogenesis [goid 7283] [evidence IEA]; The process whereby rel…	Interacting selectively with any nucleic acid [goid 3676] [evidence IEA]; Interacting selectively with any protein or protein complex (a complex of two or more proteins that may include other nonprotein molecules) [goid 5515] [evidence IEA]; Interacting selectively with zinc (Zn) ions [goid 8270] [evidence IEA]; Catalysis of the hydrolysis of any ester bond [goid 16788] [evidence IEA]; Interactin…
ILMN_1785676	RNF17	RNF17	NO	NM_031277.1	RNF17	13	Homo sapiens ring finger protein 17 (RNF17), mRNA.	TDRD4; FLJ11045; SPATA23; Mmip-2	RNF17	5260674	Homo sapiens	RefSeq	ILMN_168165	NM_031277.2	NM_031277.2		56163	94421470	NM_031277.2	NP_112567.2	5260674	I	1704	CTAAGGAAATCTGAACCATATACTGAAGGGCTGCTAAAAGACATCCAGCC	+	24272577-24272626	13q12.12b	A membrane-bounded organelle of eukaryotic cells in which chromosomes are housed and replicated. In most cells, the nucleus contains all of the cell's chromosomes except the organellar chromosomes, and is the site of RNA synthesis and processing. In some species, or in specialized cell types, RNA metabolism or DNA replication may be absent [goid 5634] [evidence IEA]; All of the contents of a cell…	The biological process whose specific outcome is the progression of a multicellular organism over time from an initial condition (e.g. a zygote or a young adult) to a later condition (e.g. a multicellular animal or an aged adult) [goid 7275] [evidence IEA]; The process of formation of spermatozoa, including spermatocytogenesis and spermiogenesis [goid 7283] [evidence IEA]; The process whereby rel…	Interacting selectively with any nucleic acid [goid 3676] [evidence IEA]; Interacting selectively with any protein or protein complex (a complex of two or more proteins that may include other nonprotein molecules) [goid 5515] [evidence IEA]; Interacting selectively with zinc (Zn) ions [goid 8270] [evidence IEA]; Catalysis of the hydrolysis of any ester bond [goid 16788] [evidence IEA]; Interactin…	Mmip-2
ILMN_1791505	RNF17	RNF17	NO	NM_031994.1	RNF17	13	Homo sapiens ring finger protein 17 (RNF17), mRNA.	TDRD4; FLJ11045; SPATA23; Mmip-2	RNF17	3390414	Homo sapiens	RefSeq	ILMN_168165	NM_031277.2	NM_031277.2		56163	94421470	NM_031277.2	NP_112567.2	3390414	A	1285	CTGCAGAGCTAGTTTTTGTAAGCCATGTAATAGATCCTTGCCATTTCTAC	+	24268278-24268327	13q12.12b	A membrane-bounded organelle of eukaryotic cells in which chromosomes are housed and replicated. In most cells, the nucleus contains all of the cell's chromosomes except the organellar chromosomes, and is the site of RNA synthesis and processing. In some species, or in specialized cell types, RNA metabolism or DNA replication may be absent [goid 5634] [evidence IEA]; All of the contents of a cell…	The biological process whose specific outcome is the progression of a multicellular organism over time from an initial condition (e.g. a zygote or a young adult) to a later condition (e.g. a multicellular animal or an aged adult) [goid 7275] [evidence IEA]; The process of formation of spermatozoa, including spermatocytogenesis and spermiogenesis [goid 7283] [evidence IEA]; The process whereby rel…	Interacting selectively with any nucleic acid [goid 3676] [evidence IEA]; Interacting selectively with any protein or protein complex (a complex of two or more proteins that may include other nonprotein molecules) [goid 5515] [evidence IEA]; Interacting selectively with zinc (Zn) ions [goid 8270] [evidence IEA]; Catalysis of the hydrolysis of any ester bond [goid 16788] [evidence IEA]; Interactin…	Mmip-2
ILMN_1668766	ROPN1	ROPN1	NO	NM_017578.2	ROPN1	3	Homo sapiens ropporin, rhophilin associated protein 1 (ROPN1), mRNA.	ROPN1A; DKFZp434B1222; ropporin; ODF6; RHPNAP1	ROPN1	5420739	Homo sapiens	RefSeq	ILMN_9116	NM_017578.2	NM_017578.2		54763	21359919	NM_017578.2	NP_060048.2	5420739	S	786	CATAATGGTGGGTCGCCCCGGATCCCGTTCAGCACCTTCCAGTTTCTCTA	-	125171656-125171705	3q21.1c		The cascade of processes by which a signal interacts with a receptor, causing a change in the level or activity of a second messenger or other downstream target, and ultimately effecting a change in the functioning of the cell [goid 7165] [evidence IEA]	Modulation of the activity of the enzyme cAMP-dependent protein kinase [goid 8603] [evidence IEA]	ROPN1A; DKFZp434B1222; ropporin; ODF6; RHPNAP1
ILMN_1691021	ROPN1B	ROPN1B	NO	XM_940725.1	ROPN1B		PREDICTED: Homo sapiens ropporin, rhophilin associated protein 1B, transcript variant 2 (ROPN1B), mRNA.		ROPN1B	4920722	Homo sapiens	RefSeq	ILMN_37584	XM_940725.2	XM_940725.2		152015	113415195	XM_940725.2	XP_945818.1	4920722	I	242	CAGAGGCTGGGTGACCTCCTGTCCAGGATTGCTCTCATCTTATGAGTCCA			3q21.2c	All of the contents of a cell excluding the plasma membrane and nucleus, but including other subcellular structures [goid 5737] [pmid 11278869] [evidence IDA]; Long whiplike or feathery structures borne either singly or in groups by the motile cells of many bacteria and unicellular eukaryotes and by the motile male gametes of many eukaryotic organisms, which propel the cell through a liquid mediu…	A cellular process resulting in the division of the cytoplasm of a cell and its separation into two daughter cells. Cytokinesis usually occurs after growth, replication, and segregation of cellular components [goid 910] [pmid 11278869] [evidence NAS]; The cascade of processes by which a signal interacts with a receptor, causing a change in the level or activity of a second messenger or other down…	Modulation of the activity of the enzyme cAMP-dependent protein kinase [goid 8603] [evidence IEA]; Functions to provide a physical support for the assembly of a multiprotein receptor signaling complex [goid 30159] [pmid 11278869] [evidence NAS]; Interacting selectively with an identical protein to form a homodimer [goid 42803] [pmid 11278869] [evidence NAS]; Interacting selectively with a noniden…
ILMN_1702055	ROPN1B	ROPN1B	NO	NM_001012337.1	ROPN1B	3	Homo sapiens ropporin, rhophilin associated protein 1B (ROPN1B), mRNA.		ROPN1B	1710390	Homo sapiens	RefSeq	ILMN_19100	NM_001012337.1	NM_001012337.1		152015	59891408	NM_001012337.1	NP_001012337.1	1710390	I	67	CCCGGCCGCTGCTGCCCTCCCCGCCGAGGTTCTACTGCTCTCCTTCTTAA	+	125688094-125688143	3q21.2c	All of the contents of a cell excluding the plasma membrane and nucleus, but including other subcellular structures [goid 5737] [pmid 11278869] [evidence IDA]; Long whiplike or feathery structures borne either singly or in groups by the motile cells of many bacteria and unicellular eukaryotes and by the motile male gametes of many eukaryotic organisms, which propel the cell through a liquid mediu…	A cellular process resulting in the division of the cytoplasm of a cell and its separation into two daughter cells. Cytokinesis usually occurs after growth, replication, and segregation of cellular components [goid 910] [pmid 11278869] [evidence NAS]; The cascade of processes by which a signal interacts with a receptor, causing a change in the level or activity of a second messenger or other down…	Modulation of the activity of the enzyme cAMP-dependent protein kinase [goid 8603] [evidence IEA]; Functions to provide a physical support for the assembly of a multiprotein receptor signaling complex [goid 30159] [pmid 11278869] [evidence NAS]; Interacting selectively with an identical protein to form a homodimer [goid 42803] [pmid 11278869] [evidence NAS]; Interacting selectively with a noniden…
ILMN_1781758	ROPN1B	ROPN1B	NO	NM_001012337.1	ROPN1B	3	Homo sapiens ropporin, rhophilin associated protein 1B (ROPN1B), mRNA.		ROPN1B	730521	Homo sapiens	RefSeq	ILMN_19100	NM_001012337.1	NM_001012337.1		152015	59891408	NM_001012337.1	NP_001012337.1	730521	A	417	CTGGGCAGAGCTAACACCTGAGCTGTTAAAGATCCTGCATTCTCAGGTTG	+	125694478-125694523:125695847-125695850	3q21.2c	All of the contents of a cell excluding the plasma membrane and nucleus, but including other subcellular structures [goid 5737] [pmid 11278869] [evidence IDA]; Long whiplike or feathery structures borne either singly or in groups by the motile cells of many bacteria and unicellular eukaryotes and by the motile male gametes of many eukaryotic organisms, which propel the cell through a liquid mediu…	A cellular process resulting in the division of the cytoplasm of a cell and its separation into two daughter cells. Cytokinesis usually occurs after growth, replication, and segregation of cellular components [goid 910] [pmid 11278869] [evidence NAS]; The cascade of processes by which a signal interacts with a receptor, causing a change in the level or activity of a second messenger or other down…	Modulation of the activity of the enzyme cAMP-dependent protein kinase [goid 8603] [evidence IEA]; Functions to provide a physical support for the assembly of a multiprotein receptor signaling complex [goid 30159] [pmid 11278869] [evidence NAS]; Interacting selectively with an identical protein to form a homodimer [goid 42803] [pmid 11278869] [evidence NAS]; Interacting selectively with a noniden…
ILMN_1801405	ROPN1B	ROPN1B	NO	XM_944760.1	ROPN1B		PREDICTED: Homo sapiens ropporin, rhophilin associated protein 1B, transcript variant 3 (ROPN1B), mRNA.		ROPN1B	4250373	Homo sapiens	RefSeq	ILMN_37645	XM_944760.1	XM_944760.1		152015	88970848	XM_944760.1	XP_949853.1	4250373	I	162	GGGACAGGGTGTTTCTCAGGGCCTTGTCTCAACTTCTCCCACAACCTCTG			3q21.2c	All of the contents of a cell excluding the plasma membrane and nucleus, but including other subcellular structures [goid 5737] [pmid 11278869] [evidence IDA]; Long whiplike or feathery structures borne either singly or in groups by the motile cells of many bacteria and unicellular eukaryotes and by the motile male gametes of many eukaryotic organisms, which propel the cell through a liquid mediu…	A cellular process resulting in the division of the cytoplasm of a cell and its separation into two daughter cells. Cytokinesis usually occurs after growth, replication, and segregation of cellular components [goid 910] [pmid 11278869] [evidence NAS]; The cascade of processes by which a signal interacts with a receptor, causing a change in the level or activity of a second messenger or other down…	Modulation of the activity of the enzyme cAMP-dependent protein kinase [goid 8603] [evidence IEA]; Functions to provide a physical support for the assembly of a multiprotein receptor signaling complex [goid 30159] [pmid 11278869] [evidence NAS]; Interacting selectively with an identical protein to form a homodimer [goid 42803] [pmid 11278869] [evidence NAS]; Interacting selectively with a noniden…
ILMN_2344120	ROPN1B	ROPN1B	NO	NM_001012337.1	ROPN1B	3	Homo sapiens ropporin, rhophilin associated protein 1B (ROPN1B), mRNA.		ROPN1B	460291	Homo sapiens	RefSeq	ILMN_19100	NM_001012337.1	NM_001012337.1		152015	59891408	NM_001012337.1	NP_001012337.1	460291	A	674	ACAATGGTGGGTTGCCCCGAATCCCATTCAGCACCTTCCAGTTTCTCTAC	+	125701162-125701211	3q21.2c	All of the contents of a cell excluding the plasma membrane and nucleus, but including other subcellular structures [goid 5737] [pmid 11278869] [evidence IDA]; Long whiplike or feathery structures borne either singly or in groups by the motile cells of many bacteria and unicellular eukaryotes and by the motile male gametes of many eukaryotic organisms, which propel the cell through a liquid mediu…	A cellular process resulting in the division of the cytoplasm of a cell and its separation into two daughter cells. Cytokinesis usually occurs after growth, replication, and segregation of cellular components [goid 910] [pmid 11278869] [evidence NAS]; The cascade of processes by which a signal interacts with a receptor, causing a change in the level or activity of a second messenger or other down…	Modulation of the activity of the enzyme cAMP-dependent protein kinase [goid 8603] [evidence IEA]; Functions to provide a physical support for the assembly of a multiprotein receptor signaling complex [goid 30159] [pmid 11278869] [evidence NAS]; Interacting selectively with an identical protein to form a homodimer [goid 42803] [pmid 11278869] [evidence NAS]; Interacting selectively with a noniden…
ILMN_1696466	ROPN1L	ROPN1L	NO	NM_031916.2	ROPN1L	5	Homo sapiens ropporin 1-like (ROPN1L), mRNA.	ASP; FLJ25776	ROPN1L	4180544	Homo sapiens	RefSeq	ILMN_26395	NM_031916.2	NM_031916.2		83853	17572806	NM_031916.2	NP_114122.2	4180544	S	740	GGGCCCGCTCGCATCCCCTTCAAGACGTTTTCCTACGTTTACCGCTACTT	+	10514353-10514402	5p15.2c		The cascade of processes by which a signal interacts with a receptor, causing a change in the level or activity of a second messenger or other downstream target, and ultimately effecting a change in the functioning of the cell [goid 7165] [evidence IEA]	Modulation of the activity of the enzyme cAMP-dependent protein kinase [goid 8603] [evidence IEA]	ASP; FLJ25776
ILMN_1744786	SAGE1	SAGE1	NO	NM_018666.1	SAGE1	X	Homo sapiens sarcoma antigen 1 (SAGE1), mRNA.	SAGE	SAGE1	1010424	Homo sapiens	RefSeq	ILMN_971	NM_018666.2	NM_018666.2		55511	145580596	NM_018666.2	NP_061136.2	1010424	S	2212	CAAATGGCCAACAGGCACCTGATAACTCCTTGTCAACGGTTCCACCTGGT	+	134821056-134821105	Xq26.3b	A membrane-bounded organelle of eukaryotic cells in which chromosomes are housed and replicated. In most cells, the nucleus contains all of the cell's chromosomes except the organellar chromosomes, and is the site of RNA synthesis and processing. In some species, or in specialized cell types, RNA metabolism or DNA replication may be absent [goid 5634] [pmid 18029348] [evidence IDA]; A small, dens…			SAGE
ILMN_2124433	SAGE1	SAGE1	NO	NM_018666.1	SAGE1	X	Homo sapiens sarcoma antigen 1 (SAGE1), mRNA.	SAGE	SAGE1	6040242	Homo sapiens	RefSeq	ILMN_183391	NM_018666.1	NM_018666.1		55511	8924241	NM_018666.1	NP_061136.1	6040242	S	2520	GCGGTAGGCACCAAAAACTACAGTGTCTCTGCAGGTGACCCACCAGTTAC	+	134821610-134821659	Xq26.3b	A membrane-bounded organelle of eukaryotic cells in which chromosomes are housed and replicated. In most cells, the nucleus contains all of the cell's chromosomes except the organellar chromosomes, and is the site of RNA synthesis and processing. In some species, or in specialized cell types, RNA metabolism or DNA replication may be absent [goid 5634] [pmid 18029348] [evidence IDA]; A small, dens…			SAGE
ILMN_2312498	SEMG1	SEMG1	NO	NM_003007.2	SEMG1	20	Homo sapiens semenogelin I (SEMG1), transcript variant 1, mRNA.	SEMG; SGI; MGC14719	SEMG1	6290445	Homo sapiens	RefSeq	ILMN_171883	NM_003007.2	NM_003007.2		6406	38049012	NM_003007.2	NP_002998.1	6290445	A	1476	TTCTGTGATGTTTCTGAGATGCAGACTCCCGTGTAGTTTCAGATTCTTGG	+	43271677-43271726	20q13.12b	The space external to the outermost structure of a cell. For cells without external protective or external encapsulating structures this refers to space outside of the plasma membrane. This term covers the host cell environment outside an intracellular parasite [goid 5576] [evidence IEA]; That part of a multicellular organism outside the cells proper, usually taken to be outside the plasma membra…	The introduction of semen or sperm into the genital tract of a female [goid 7320] [pmid 2912989] [evidence TAS]; The regular alternation, in the life cycle of haplontic, diplontic and diplohaplontic organisms, of meiosis and fertilization which provides for the production offspring. In diplontic organisms there is a life cycle in which the products of meiosis behave directly as gametes, fusing to…	The action of a molecule that contributes to the structural integrity of a complex or assembly within or outside a cell [goid 5198] [evidence IEA]	SEMG; SGI; MGC14719
ILMN_2397347	SEMG1	SEMG1	NO	NM_198139.1	SEMG1	20	Homo sapiens semenogelin I (SEMG1), transcript variant 2, mRNA.	SEMG; SGI; MGC14719	SEMG1	840609	Homo sapiens	RefSeq	ILMN_3432	NM_198139.1	NM_198139.1		6406	38049013	NM_198139.1	NP_937782.1	840609	A	1357	CACCACCTGCCCATGCTTCCTTGAATTAGGCTTTCCTAACCTGAAGCGCC	+	43271738-43271787	20q13.12b	The space external to the outermost structure of a cell. For cells without external protective or external encapsulating structures this refers to space outside of the plasma membrane. This term covers the host cell environment outside an intracellular parasite [goid 5576] [evidence IEA]; That part of a multicellular organism outside the cells proper, usually taken to be outside the plasma membra…	The introduction of semen or sperm into the genital tract of a female [goid 7320] [pmid 2912989] [evidence TAS]; The regular alternation, in the life cycle of haplontic, diplontic and diplohaplontic organisms, of meiosis and fertilization which provides for the production offspring. In diplontic organisms there is a life cycle in which the products of meiosis behave directly as gametes, fusing to…	The action of a molecule that contributes to the structural integrity of a complex or assembly within or outside a cell [goid 5198] [evidence IEA]	SEMG; SGI; MGC14719
ILMN_1761717	SLCO6A1	SLCO6A1	NO	NM_173488.2	SLCO6A1	5	Homo sapiens solute carrier organic anion transporter family, member 6A1 (SLCO6A1), mRNA.	MGC26949; OATPY; OATP6A1; GST	SLCO6A1	6560246	Homo sapiens	RefSeq	ILMN_170741	NM_173488.3	NM_173488.3		133482	93277098	NM_173488.3	NP_775759.3	6560246	S	1984	GCGGGTTGTACCTGACAAACTGCGTTCTCTGGCCTTGGGTGTAAGCTATG	-	101815938-101815987	5q21.1d	Double layer of lipid molecules that encloses all cells, and, in eukaryotes, many organelles; may be a single or double lipid bilayer; also includes associated proteins [goid 16020] [evidence IEA]; Penetrating at least one phospholipid bilayer of a membrane. May also refer to the state of being buried in the bilayer with no exposure outside the bilayer. When used to describe a protein, indicates …	The directed movement of substances (such as macromolecules, small molecules, ions) into, out of, within or between cells, or within a multicellular organism [goid 6810] [evidence IEA]	Enables the directed movement of substances (such as macromolecules, small molecules, ions) into, out of, within or between cells [goid 5215] [evidence IEA]	MGC26949; OATPY; OATP6A1; GST
ILMN_1678423	SPA17	SPA17	NO	NM_017425.2	SPA17	11	Homo sapiens sperm autoantigenic protein 17 (SPA17), mRNA.	SP17; SP17-1	SPA17	5310286	Homo sapiens	RefSeq	ILMN_9648	NM_017425.2	NM_017425.2		53340	15718773	NM_017425.2	NP_059121.1	5310286	S	488	CTGTCAAAATCCAAGCTGCCTTCCGGGGACACATAGCCAGAGAGGAGGCA	+	124069448-124069497	11q24.2a	Double layer of lipid molecules that encloses all cells, and, in eukaryotes, many organelles; may be a single or double lipid bilayer; also includes associated proteins [goid 16020] [evidence IEA]	The cascade of processes by which a signal interacts with a receptor, causing a change in the level or activity of a second messenger or other downstream target, and ultimately effecting a change in the functioning of the cell [goid 7165] [evidence IEA]; The process of formation of spermatozoa, including spermatocytogenesis and spermiogenesis [goid 7283] [pmid 8688458] [evidence TAS]; The union o…	Modulation of the activity of the enzyme cAMP-dependent protein kinase [goid 8603] [evidence IEA]	SP17; SP17-1
ILMN_1775408	SPACA3	SPACA3	NO	NM_173847.2	SPACA3	17	Homo sapiens sperm acrosome associated 3 (SPACA3), mRNA.	1700025M08Rik; MGC119058; SLLP1; LYZL3; LYC3; ALLP17	SPACA3	1430709	Homo sapiens	RefSeq	ILMN_4531	NM_173847.3	NM_173847.3		124912	142360775	NM_173847.3	NP_776246.1	1430709	S	709	GGCTGTGACTTCTAGGATGGACGGAACCATGCACAGCAGGCTGGGAAATG	+	28348895-28348909:28348910-28348944	17q11.2e	A structure in the head of a spermatozoon that contains acid hydrolases, and is concerned with the breakdown of the outer membrane of the ovum during fertilization. It lies just beneath the plasma membrane and is derived from the lysosome [goid 1669] [evidence IEA]; The membrane that surrounds the acrosomal lumen. The acrosome is a special type of lysosome in the head of a spermatozoon that conta…	The chemical reactions and pathways resulting in the breakdown of peptidoglycans, any of a class of glycoconjugates found in bacterial cell walls [goid 9253] [pmid 16150577] [evidence TAS]; A change in state or activity of a cell or an organism (in terms of movement, secretion, enzyme production, gene expression, etc.) as a result of a stimulus from a virus [goid 9615] [pmid 16150577] [evidence T…	Catalysis of the hydrolysis of the 1,4-beta-linkages between N-acetyl-D-glucosamine and N-acetylmuramic acid in peptidoglycan heteropolymers of the prokaryotes cell walls and between N-acetyl-D-glucosamine residues in chitodextrins [goid 3796] [pmid 5154881] [evidence IDA]; Interacting selectively with any part of a bacterial cell [goid 8367] [pmid 16150577] [evidence TAS]; Catalysis of the hydro…	1700025M08Rik; MGC119058; SLLP1; LYZL3; LYC3; ALLP17
ILMN_1652314	SPAG1	SPAG1	NO	NM_172218.1	SPAG1	8	Homo sapiens sperm associated antigen 1 (SPAG1), transcript variant 2, mRNA.	HSD-3.8; TPIS; FLJ32920; SP75	SPAG1	6280296	Homo sapiens	RefSeq	ILMN_12212	NM_172218.1	NM_172218.1		6674	27262637	NM_172218.1	NP_757367.1	6280296	I	35	AGAGCCGGTGCGGCGGCCGCGACTTCCCCGACGCGGGGCGCTGAGAAGCA	+	101170297-101170346	8q22.2b	All of the contents of a cell excluding the plasma membrane and nucleus, but including other subcellular structures [goid 5737] [evidence IEA]	The union of male and female gametes to form a zygote [goid 7338] [pmid 1299558] [evidence TAS]	Interacting selectively with a nucleotide, any compound consisting of a nucleoside that is esterified with (ortho)phosphate or an oligophosphate at any hydroxyl group on the ribose or deoxyribose moiety [goid 166] [evidence IEA]; Interacting selectively with GTP, guanosine triphosphate [goid 5525] [evidence IEA]; Catalysis of the hydrolysis of various bonds, e.g. C-O, C-N, C-C, phosphoric anhydri…	HSD-3.8; TPIS; FLJ32920; SP75
ILMN_1705522	SPAG1	SPAG1	NO	NM_003114.3	SPAG1	8	Homo sapiens sperm associated antigen 1 (SPAG1), transcript variant 1, mRNA.	HSD-3.8; TPIS; FLJ32920; SP75	SPAG1	4760131	Homo sapiens	RefSeq	ILMN_3645	NM_003114.3	NM_003114.3		6674	27262635	NM_003114.3	NP_003105.2	4760131	I	134	TCGGTGGGAGAGACCCAGCTTTTCGCGTTAGTAGGCCCGAGCAGTTTGAA	+	101170789-101170838	8q22.2b	All of the contents of a cell excluding the plasma membrane and nucleus, but including other subcellular structures [goid 5737] [evidence IEA]	The union of male and female gametes to form a zygote [goid 7338] [pmid 1299558] [evidence TAS]	Interacting selectively with a nucleotide, any compound consisting of a nucleoside that is esterified with (ortho)phosphate or an oligophosphate at any hydroxyl group on the ribose or deoxyribose moiety [goid 166] [evidence IEA]; Interacting selectively with GTP, guanosine triphosphate [goid 5525] [evidence IEA]; Catalysis of the hydrolysis of various bonds, e.g. C-O, C-N, C-C, phosphoric anhydri…	HSD-3.8; TPIS; FLJ32920; SP75
ILMN_1712773	SPAG1	SPAG1	NO	NM_003114.3	SPAG1	8	Homo sapiens sperm associated antigen 1 (SPAG1), transcript variant 2, mRNA.	HSD-3.8; TPIS; FLJ32920; SP75	SPAG1	6130601	Homo sapiens	RefSeq	ILMN_12212	NM_172218.1	NM_172218.1		6674	27262637	NM_172218.1	NP_757367.1	6130601	A	2434	AGAAGGGAGGCAAAAGCAGCAGGTCACCAGAAGACCCTGAGAAACTTCCG	+	101247224-101247273	8q22.2b	All of the contents of a cell excluding the plasma membrane and nucleus, but including other subcellular structures [goid 5737] [evidence IEA]	The union of male and female gametes to form a zygote [goid 7338] [pmid 1299558] [evidence TAS]	Interacting selectively with a nucleotide, any compound consisting of a nucleoside that is esterified with (ortho)phosphate or an oligophosphate at any hydroxyl group on the ribose or deoxyribose moiety [goid 166] [evidence IEA]; Interacting selectively with GTP, guanosine triphosphate [goid 5525] [evidence IEA]; Catalysis of the hydrolysis of various bonds, e.g. C-O, C-N, C-C, phosphoric anhydri…	HSD-3.8; TPIS; FLJ32920; SP75
ILMN_2367681	SPAG1	SPAG1	NO	NM_003114.3	SPAG1	8	Homo sapiens sperm associated antigen 1 (SPAG1), transcript variant 1, mRNA.	HSD-3.8; TPIS; FLJ32920; SP75	SPAG1	2680553	Homo sapiens	RefSeq	ILMN_178027	NM_003114.3	NM_003114.3		6674	27262635	NM_003114.3	NP_003105.2	2680553	A	3791	AGAACTCATACATGTTGAAAGCTCCTTTGTTGACTGGGTCAAAGTGAAGG	+	101253578-101253627	8q22.2b	All of the contents of a cell excluding the plasma membrane and nucleus, but including other subcellular structures [goid 5737] [evidence IEA]	The union of male and female gametes to form a zygote [goid 7338] [pmid 1299558] [evidence TAS]	Interacting selectively with a nucleotide, any compound consisting of a nucleoside that is esterified with (ortho)phosphate or an oligophosphate at any hydroxyl group on the ribose or deoxyribose moiety [goid 166] [evidence IEA]; Interacting selectively with GTP, guanosine triphosphate [goid 5525] [evidence IEA]; Catalysis of the hydrolysis of various bonds, e.g. C-O, C-N, C-C, phosphoric anhydri…	HSD-3.8; TPIS; FLJ32920; SP75
ILMN_1693114	SPAG17	SPAG17	NO	NM_206996.1	SPAG17	1	Homo sapiens sperm associated antigen 17 (SPAG17), mRNA.	FLJ44343; FLJ44353; FLJ34497; RP4-776P7.2; DKFZp434B0610; PF6	SPAG17	2450653	Homo sapiens	RefSeq	ILMN_6928	NM_206996.1	NM_206996.1		200162	46240863	NM_206996.1	NP_996879.1	2450653	S	6995	CTAGACACTCTGAATAGGGCAGGTCCCAGGAACACCTGAAAGGAGCACAT	-	118297877-118297926	1p12c	All of the contents of a cell excluding the plasma membrane and nucleus, but including other subcellular structures [goid 5737] [evidence IEA]; Any of the long, generally straight, hollow tubes of internal diameter 12-15 nm and external diameter 24 nm found in a wide variety of eukaryotic cells; each consists (usually) of 13 protofilaments of polymeric tubulin, staggered in such a manner that the…			FLJ44343; FLJ44353; FLJ34497; RP4-776P7.2; DKFZp434B0610; PF6
ILMN_1684620	SPAG4	SPAG4	NO	NM_003116.1	SPAG4	20	Homo sapiens sperm associated antigen 4 (SPAG4), mRNA.		SPAG4	1190670	Homo sapiens	RefSeq	ILMN_15424	NM_003116.1	NM_003116.1		6676	11037054	NM_003116.1	NP_003107.1	1190670	S	1046	ATTGCTGGGCTTTTGAAGGCGACCAAGGCCAGGTGGTGATCCAACTGCCG	+	33670934-33670983	20q11.22b	All of the contents of a cell excluding the plasma membrane and nucleus, but including other subcellular structures [goid 5737] [evidence IEA]; Any of the various filamentous elements that form the internal framework of cells, and typically remain after treatment of the cells with mild detergent to remove membrane constituents and soluble components of the cytoplasm. The term embraces intermediat…	The process of formation of spermatozoa, including spermatocytogenesis and spermiogenesis [goid 7283] [pmid 9691178] [evidence TAS]	The action of a molecule that contributes to the structural integrity of a complex or assembly within or outside a cell [goid 5198] [pmid 9691178] [evidence TAS]
ILMN_1772458	SPAG6	SPAG6	NO	NM_012443.2	SPAG6	10	Homo sapiens sperm associated antigen 6 (SPAG6), transcript variant 1, mRNA.	MGC26276; Repro-SA-1; DKFZp434I153; pf16	SPAG6	620438	Homo sapiens	RefSeq	ILMN_173595	NM_012443.2	NM_012443.2		9576	27262639	NM_012443.2	NP_036575.1	620438	I	1460	CTGCCGCATGATAGCAAAGCTCGACGACTTTTTGTAACAAGTGGTGGCCT	+	22680707-22680756	10p12.31a	All of the contents of a cell excluding the plasma membrane and nucleus, but including other subcellular structures [goid 5737] [evidence IEA]; Any of the long, generally straight, hollow tubes of internal diameter 12-15 nm and external diameter 24 nm found in a wide variety of eukaryotic cells; each consists (usually) of 13 protofilaments of polymeric tubulin, staggered in such a manner that the…	The process whose specific outcome is the progression of a male gamete over time, from initial commitment of the cell to a specific fate, to the fully functional differentiated cell [goid 7286] [pmid 10493827] [evidence TAS]; A process that is carried out at the cellular level which results in the formation, arrangement of constituent parts, or disassembly of a prolongation or process extending f…	The selective, often stoichiometric, interaction of a molecule with one or more specific sites on another molecule [goid 5488] [evidence IEA]	MGC26276; Repro-SA-1; DKFZp434I153; pf16
ILMN_2313378	SPAG6	SPAG6	NO	NM_172242.1	SPAG6	10	Homo sapiens sperm associated antigen 6 (SPAG6), transcript variant 2, mRNA.	MGC26276; Repro-SA-1; DKFZp434I153; pf16	SPAG6	6770446	Homo sapiens	RefSeq	ILMN_9635	NM_172242.1	NM_172242.1		9576	27262640	NM_172242.1	NP_758442.1	6770446	A	2121	TCCCCACCCTATCTAAAGTGTTCCTTACCTTTCATGGGCCCAGCGAGGGT	+	22705598-22705610:22705611-22705647	10p12.31a	All of the contents of a cell excluding the plasma membrane and nucleus, but including other subcellular structures [goid 5737] [evidence IEA]; Any of the long, generally straight, hollow tubes of internal diameter 12-15 nm and external diameter 24 nm found in a wide variety of eukaryotic cells; each consists (usually) of 13 protofilaments of polymeric tubulin, staggered in such a manner that the…	The process whose specific outcome is the progression of a male gamete over time, from initial commitment of the cell to a specific fate, to the fully functional differentiated cell [goid 7286] [pmid 10493827] [evidence TAS]; A process that is carried out at the cellular level which results in the formation, arrangement of constituent parts, or disassembly of a prolongation or process extending f…	The selective, often stoichiometric, interaction of a molecule with one or more specific sites on another molecule [goid 5488] [evidence IEA]	MGC26276; Repro-SA-1; DKFZp434I153; pf16
ILMN_1676907	SPAG8	SPAG8	NO	NM_012436.2	SPAG8	9	Homo sapiens sperm associated antigen 8 (SPAG8), transcript variant 1, mRNA.	HSD-1; BS-84; SMP1; SPAG3; hSMP-1; MGC26201	SPAG8	7550014	Homo sapiens	RefSeq	ILMN_19303	NM_012436.2	NM_012436.2		26206	27502371	NM_012436.2	NP_036568.1	7550014	I	1837	GAGTCACTGTGTGCATACCCCATAACCTTTCCTTGGGATTGCCCCTATCC	-	35799735-35799784	9p13.3a	A structure in the head of a spermatozoon that contains acid hydrolases, and is concerned with the breakdown of the outer membrane of the ovum during fertilization. It lies just beneath the plasma membrane and is derived from the lysosome [goid 1669] [evidence IEA]; Double layer of lipid molecules that encloses all cells, and, in eukaryotes, many organelles; may be a single or double lipid bilaye…	Any process specifically pertinent to the functioning of integrated living units: cells, tissues, organs, and organisms. A process is a collection of molecular events with a defined beginning and end [goid 8150] [evidence ND ]	Elemental activities, such as catalysis or binding, describing the actions of a gene product at the molecular level. A given gene product may exhibit one or more molecular functions [goid 3674] [evidence ND ]	HSD-1; BS-84; SMP1; SPAG3; hSMP-1; MGC26201
ILMN_1754370	SPAG8	SPAG8	NO	NM_172312.1	SPAG8	9	Homo sapiens sperm associated antigen 8 (SPAG8), transcript variant 2, mRNA.	HSD-1; BS-84; SMP1; SPAG3; hSMP-1; MGC26201	SPAG8	430451	Homo sapiens	RefSeq	ILMN_22683	NM_172312.1	NM_172312.1		26206	27502372	NM_172312.1	NP_758516.1	430451	A	1601	CAAGAGGACAGAGGCTGGTGAGGAGGTAAAGCAGGCCCAGTGAAATGGAC	-	35808140-35808169:35808170-35808189	9p13.3a	A structure in the head of a spermatozoon that contains acid hydrolases, and is concerned with the breakdown of the outer membrane of the ovum during fertilization. It lies just beneath the plasma membrane and is derived from the lysosome [goid 1669] [evidence IEA]; Double layer of lipid molecules that encloses all cells, and, in eukaryotes, many organelles; may be a single or double lipid bilaye…	Any process specifically pertinent to the functioning of integrated living units: cells, tissues, organs, and organisms. A process is a collection of molecular events with a defined beginning and end [goid 8150] [evidence ND ]	Elemental activities, such as catalysis or binding, describing the actions of a gene product at the molecular level. A given gene product may exhibit one or more molecular functions [goid 3674] [evidence ND ]	HSD-1; BS-84; SMP1; SPAG3; hSMP-1; MGC26201
ILMN_2354222	SPAG8	SPAG8	NO	NM_001039592.1	SPAG8	9	Homo sapiens sperm associated antigen 8 (SPAG8), transcript variant 1, mRNA.	SPAG3; HSD-1; BS-84; SMP1; hSMP-1; MGC26201	SPAG8	940632	Homo sapiens	RefSeq	ILMN_37947	NM_001039592.1	NM_001039592.1		26206	88853065	NM_001039592.1	NP_001034681.1	940632	A	1137	TCTATTGGCCACTTCGAGGGAAGCGTGAAGCCATGCTGGAGATGCTCCTG	-	35810647-35810679:35810880-35810896	9p13.3a	A structure in the head of a spermatozoon that contains acid hydrolases, and is concerned with the breakdown of the outer membrane of the ovum during fertilization. It lies just beneath the plasma membrane and is derived from the lysosome [goid 1669] [evidence IEA]; Double layer of lipid molecules that encloses all cells, and, in eukaryotes, many organelles; may be a single or double lipid bilaye…	Any process specifically pertinent to the functioning of integrated living units: cells, tissues, organs, and organisms. A process is a collection of molecular events with a defined beginning and end [goid 8150] [evidence ND ]	Elemental activities, such as catalysis or binding, describing the actions of a gene product at the molecular level. A given gene product may exhibit one or more molecular functions [goid 3674] [evidence ND ]	HSD-1; BS-84; SMP1; SPAG3; hSMP-1; MGC26201
ILMN_1728256	SPAG9	SPAG9	NO	NM_172345.1	SPAG9	17	Homo sapiens sperm associated antigen 9 (SPAG9), mRNA.	FLJ34602; MGC14967; MGC117291; FLJ26141; JLP; HLC4; FLJ13450; PHET; MGC74461; HSS; PIG6; FLJ14006; KIAA0516	SPAG9	130164	Homo sapiens	RefSeq	ILMN_19153	NM_003971.3	NM_003971.3		9043	27436919	NM_003971.3	NP_003962.3	130164	A	3153	CCTCTTAGACCTTGGACGGCCTCATCATTCCATCCGTTGCATGACTGTGG	-	46414954-46415003	17q21.33b	A structure in the head of a spermatozoon that contains acid hydrolases, and is concerned with the breakdown of the outer membrane of the ovum during fertilization. It lies just beneath the plasma membrane and is derived from the lysosome [goid 1669] [evidence IEA]; All of the contents of a cell excluding the plasma membrane and nucleus, but including other subcellular structures [goid 5737] [evi…	The initiation of the activity of the inactive enzyme MAP kinase by phosphorylation by a MAPKK [goid 187] [evidence IEA]; The process of formation of spermatozoa, including spermatocytogenesis and spermiogenesis [goid 7283] [pmid 9480848] [evidence TAS]; The process of creating protein oligomers, compounds composed of a small number, usually between three and ten, of identical component monomers.…	Interacting selectively with any protein or protein complex (a complex of two or more proteins that may include other nonprotein molecules) [goid 5515] [pmid 14743216] [evidence IPI]; Interacting selectively with JUN kinase, an enzyme that catalyzes the phosphorylation and activation of members of the JUN family [goid 8432] [evidence IEA]; Interacting selectively and stoichiometrically with kines…	PHET; MGC74461; HSS; PIG6; KIAA0516; FLJ34602; MGC14967; MGC117291; JLP; HLC4; FLJ13450; FLJ14006
ILMN_1768798	SPAG9	SPAG9	NO	NM_172345.1	SPAG9	17	Homo sapiens sperm associated antigen 9 (SPAG9), transcript variant 2, mRNA.	PHET; MGC74461; HSS; PIG6; KIAA0516; FLJ34602; MGC14967; MGC117291; JLP; HLC4; FLJ13450; FLJ14006	SPAG9	1070687	Homo sapiens	RefSeq	ILMN_21524	NM_172345.1	NM_172345.1		9043	27436921	NM_172345.1	NP_758853.1	1070687	I	2789	GTACATGGGATTTCATGAGCCAGAGGAGGCATTTGGATCCATTGGGCCAC	-	46396381-46396430	17q21.33b	A structure in the head of a spermatozoon that contains acid hydrolases, and is concerned with the breakdown of the outer membrane of the ovum during fertilization. It lies just beneath the plasma membrane and is derived from the lysosome [goid 1669] [evidence IEA]; All of the contents of a cell excluding the plasma membrane and nucleus, but including other subcellular structures [goid 5737] [evi…	The initiation of the activity of the inactive enzyme MAP kinase by phosphorylation by a MAPKK [goid 187] [evidence IEA]; The process of formation of spermatozoa, including spermatocytogenesis and spermiogenesis [goid 7283] [pmid 9480848] [evidence TAS]; The process of creating protein oligomers, compounds composed of a small number, usually between three and ten, of identical component monomers.…	Interacting selectively with any protein or protein complex (a complex of two or more proteins that may include other nonprotein molecules) [goid 5515] [pmid 14743216] [evidence IPI]; Interacting selectively with JUN kinase, an enzyme that catalyzes the phosphorylation and activation of members of the JUN family [goid 8432] [evidence IEA]; Interacting selectively and stoichiometrically with kines…	PHET; MGC74461; HSS; PIG6; KIAA0516; FLJ34602; MGC14967; MGC117291; JLP; HLC4; FLJ13450; FLJ14006
ILMN_1799104	SPAG9	SPAG9	NO	NM_003971.3	SPAG9	17	Homo sapiens sperm associated antigen 9 (SPAG9), mRNA.	FLJ34602; MGC14967; MGC117291; FLJ26141; JLP; HLC4; FLJ13450; PHET; MGC74461; HSS; PIG6; FLJ14006; KIAA0516	SPAG9	3370603	Homo sapiens	RefSeq	ILMN_19153	NM_003971.3	NM_003971.3		9043	27436919	NM_003971.3	NP_003962.3	3370603	I	4005	CCATGGGAAACAGGTGGAGATGGGGAAGCCGTCTCTTCTGCATGGTTTAT	-	46398579-46398628	17q21.33b	A structure in the head of a spermatozoon that contains acid hydrolases, and is concerned with the breakdown of the outer membrane of the ovum during fertilization. It lies just beneath the plasma membrane and is derived from the lysosome [goid 1669] [evidence IEA]; All of the contents of a cell excluding the plasma membrane and nucleus, but including other subcellular structures [goid 5737] [evi…	The initiation of the activity of the inactive enzyme MAP kinase by phosphorylation by a MAPKK [goid 187] [evidence IEA]; The process of formation of spermatozoa, including spermatocytogenesis and spermiogenesis [goid 7283] [pmid 9480848] [evidence TAS]; The process of creating protein oligomers, compounds composed of a small number, usually between three and ten, of identical component monomers.…	Interacting selectively with any protein or protein complex (a complex of two or more proteins that may include other nonprotein molecules) [goid 5515] [pmid 14743216] [evidence IPI]; Interacting selectively with JUN kinase, an enzyme that catalyzes the phosphorylation and activation of members of the JUN family [goid 8432] [evidence IEA]; Interacting selectively and stoichiometrically with kines…	FLJ26141; PHET; MGC74461; HSS; PIG6; KIAA0516; FLJ34602; MGC14967; MGC117291; JLP; HLC4; FLJ13450; FLJ14006
ILMN_2263718	SPAG9	SPAG9	NO	NM_003971.3	SPAG9	17	Homo sapiens sperm associated antigen 9 (SPAG9), mRNA.	FLJ34602; MGC14967; MGC117291; FLJ26141; JLP; HLC4; FLJ13450; PHET; MGC74461; HSS; PIG6; FLJ14006; KIAA0516	SPAG9	1770730	Homo sapiens	RefSeq	ILMN_19153	NM_003971.3	NM_003971.3		9043	27436919	NM_003971.3	NP_003962.3	1770730	I	4296	GCCACAGTCTAATGTCATTCACTTCATTTGATGGGGTCACTTGTTAGCTG	-	46398288-46398337	17q21.33b	A structure in the head of a spermatozoon that contains acid hydrolases, and is concerned with the breakdown of the outer membrane of the ovum during fertilization. It lies just beneath the plasma membrane and is derived from the lysosome [goid 1669] [evidence IEA]; All of the contents of a cell excluding the plasma membrane and nucleus, but including other subcellular structures [goid 5737] [evi…	The initiation of the activity of the inactive enzyme MAP kinase by phosphorylation by a MAPKK [goid 187] [evidence IEA]; The process of formation of spermatozoa, including spermatocytogenesis and spermiogenesis [goid 7283] [pmid 9480848] [evidence TAS]; The process of creating protein oligomers, compounds composed of a small number, usually between three and ten, of identical component monomers.…	Interacting selectively with any protein or protein complex (a complex of two or more proteins that may include other nonprotein molecules) [goid 5515] [pmid 14743216] [evidence IPI]; Interacting selectively with JUN kinase, an enzyme that catalyzes the phosphorylation and activation of members of the JUN family [goid 8432] [evidence IEA]; Interacting selectively and stoichiometrically with kines…	FLJ26141; PHET; MGC74461; HSS; PIG6; KIAA0516; FLJ34602; MGC14967; MGC117291; JLP; HLC4; FLJ13450; FLJ14006
ILMN_2233314	SPANXA1	SPANXA1	NO	NM_013453.2	SPANXA1	X	Homo sapiens sperm protein associated with the nucleus, X-linked, family member A1 (SPANXA1), mRNA.	SPAN-Xb; SPANX-C; SPANX; SPANXD; SPANXA2; NAP-X; SPANX-D; SPANXC; SPANX-A2; SPAN-Xa	SPANXA1	7550121	Homo sapiens	RefSeq	ILMN_9452	NM_013453.2	NM_013453.2		30014	14192936	NM_013453.2	NP_038481.2	7550121	S	203	GGAGGAACTTTAAAAGAACATCTCCAGAGGAACTGCTGAATGACCACGCC	-	140671937-140671986	Xq27.2a	A membrane-bounded organelle of eukaryotic cells in which chromosomes are housed and replicated. In most cells, the nucleus contains all of the cell's chromosomes except the organellar chromosomes, and is the site of RNA synthesis and processing. In some species, or in specialized cell types, RNA metabolism or DNA replication may be absent [goid 5634] [pmid 10906052] [evidence TAS]; All of the co…	The process of formation of spermatozoa, including spermatocytogenesis and spermiogenesis [goid 7283] [pmid 10906052] [evidence TAS]		SPAN-Xb; SPANX-C; SPANX; SPANXD; SPANXA2; NAP-X; SPANX-D; SPANXC; SPANX-A2; SPAN-Xa
ILMN_2233319	SPANXA1	SPANXA1	NO	NM_013453.2	SPANXA1	X	Homo sapiens sperm protein associated with the nucleus, X-linked, family member A1 (SPANXA1), mRNA.	SPAN-Xb; SPANX-C; SPANX; SPANXD; SPANXA2; NAP-X; SPANX-D; SPANXC; SPANX-A2; SPAN-Xa	SPANXA1	4280092	Homo sapiens	RefSeq	ILMN_9452	NM_013453.2	NM_013453.2		30014	14192936	NM_013453.2	NP_038481.2	4280092	S	205	AGGAACTTTAAAAGAACATCTCCAGAGGAACTGCTGAATGACCACGCCCG	-	140671935-140671984	Xq27.2a	A membrane-bounded organelle of eukaryotic cells in which chromosomes are housed and replicated. In most cells, the nucleus contains all of the cell's chromosomes except the organellar chromosomes, and is the site of RNA synthesis and processing. In some species, or in specialized cell types, RNA metabolism or DNA replication may be absent [goid 5634] [pmid 10906052] [evidence TAS]; All of the co…	The process of formation of spermatozoa, including spermatocytogenesis and spermiogenesis [goid 7283] [pmid 10906052] [evidence TAS]		SPAN-Xb; SPANX-C; SPANX; SPANXD; SPANXA2; NAP-X; SPANX-D; SPANXC; SPANX-A2; SPAN-Xa
ILMN_1653415	SPANXA2	SPANXA2	NO	NM_013453.2	SPANXA2	X	Homo sapiens SPANX family, member A2 (SPANXA2), mRNA.	SPANX; SPANXA	SPANXA2	6960653	Homo sapiens	RefSeq	ILMN_28893	NM_145662.2	NM_145662.2		728712	49619235	NM_145662.2	NP_663695.1	6960653	S	124	AACGAGATGATGCCGGAGACCCCAACTGGGGACTCAGACCCGCAACCTGC	+	140505621-140505632:140506280-140506317	Xq27.2a				SPAN-Xb; SPANX-C; SPANX; SPANXD; SPANXA2; NAP-X; SPANX-D; SPANXC; SPANX-A2; SPAN-Xa
ILMN_2211030	SPANXB1	SPANXB1	NO	NM_032461.2	SPANXB1	X	Homo sapiens SPANX family, member B1 (SPANXB1), mRNA.	SPANX-B; SPANXB	SPANXB1	3370369	Homo sapiens	RefSeq	ILMN_23554	NM_032461.2	NM_032461.2		728695	22027490	NM_032461.2	NP_115850.1	3370369	S	181	GGCCAACAAGACGATGCCGGAGACCCCAACTGGGGACTCAGACCCGCAAC	+	139924607-139924619:139925267-139925303	Xq27.1d	A membrane-bounded organelle of eukaryotic cells in which chromosomes are housed and replicated. In most cells, the nucleus contains all of the cell's chromosomes except the organellar chromosomes, and is the site of RNA synthesis and processing. In some species, or in specialized cell types, RNA metabolism or DNA replication may be absent [goid 5634] [pmid 10906052] [evidence TAS]; All of the co…	The process whose specific outcome is the progression of a male gamete over time, from initial commitment of the cell to a specific fate, to the fully functional differentiated cell [goid 7286] [pmid 10906052] [evidence NAS]	Elemental activities, such as catalysis or binding, describing the actions of a gene product at the molecular level. A given gene product may exhibit one or more molecular functions [goid 3674] [evidence ND ]	SPANX-B; SPANXB
ILMN_2211032	SPANXB1	SPANXB1	NO	NM_032461.2	SPANXB1	X	Homo sapiens SPANX family, member B1 (SPANXB1), mRNA.	SPANX-B; SPANXB	SPANXB1	4120647	Homo sapiens	RefSeq	ILMN_23554	NM_032461.2	NM_032461.2		728695	22027490	NM_032461.2	NP_115850.1	4120647	S	421	AGCTACATCCCTCAAACTTCGGCAATGAAAATAAAGTTTGAGAAGCTGAA	+	139925494-139925543	Xq27.1d	A membrane-bounded organelle of eukaryotic cells in which chromosomes are housed and replicated. In most cells, the nucleus contains all of the cell's chromosomes except the organellar chromosomes, and is the site of RNA synthesis and processing. In some species, or in specialized cell types, RNA metabolism or DNA replication may be absent [goid 5634] [pmid 10906052] [evidence TAS]; All of the co…	The process whose specific outcome is the progression of a male gamete over time, from initial commitment of the cell to a specific fate, to the fully functional differentiated cell [goid 7286] [pmid 10906052] [evidence NAS]	Elemental activities, such as catalysis or binding, describing the actions of a gene product at the molecular level. A given gene product may exhibit one or more molecular functions [goid 3674] [evidence ND ]	SPANX-B; SPANXB
ILMN_2198300	SPANXC	SPANXC	NO	NM_022661.2	SPANXC	X	Homo sapiens SPANX family, member C (SPANXC), mRNA.	SPANX-C; CTp11	SPANXC	2570280	Homo sapiens	RefSeq	ILMN_1520	NM_022661.2	NM_022661.2		64663	22027493	NM_022661.2	NP_073152.1	2570280	S	99	CCCTGTGAATCCAACGAGGTGAATGAGACGATGCCGGAGACCCCAACTGG	-	140335851-140335871:140336519-140336547	Xq27.2a	A membrane-bounded organelle of eukaryotic cells in which chromosomes are housed and replicated. In most cells, the nucleus contains all of the cell's chromosomes except the organellar chromosomes, and is the site of RNA synthesis and processing. In some species, or in specialized cell types, RNA metabolism or DNA replication may be absent [goid 5634] [pmid 10626816] [evidence TAS]; All of the co…	Any process specifically pertinent to the functioning of integrated living units: cells, tissues, organs, and organisms. A process is a collection of molecular events with a defined beginning and end [goid 8150] [evidence ND ]	Elemental activities, such as catalysis or binding, describing the actions of a gene product at the molecular level. A given gene product may exhibit one or more molecular functions [goid 3674] [pmid 10626816] [evidence ND ]	SPANX-C; CTp11
ILMN_3242729	SPANXD	SPANXD	NO	NM_032417.2	SPANXD	X	Homo sapiens SPANX family, member D (SPANXD), mRNA.	MGC119769; SPANX-D; dJ171K16.1	SPANXD	5340437	Homo sapiens	RefSeq	ILMN_2627	NM_032417.2	NM_032417.2		64648	22027494	NM_032417.2	NP_115793.1	5340437	S	88	TCCAACGAGGCCAACGAGATGATGCCGGAGACCTCGAGTGGGTACTCAGA	-	140785814-140785843:140786491-140786510	Xq27.2a	A membrane-bounded organelle of eukaryotic cells in which chromosomes are housed and replicated. In most cells, the nucleus contains all of the cell's chromosomes except the organellar chromosomes, and is the site of RNA synthesis and processing. In some species, or in specialized cell types, RNA metabolism or DNA replication may be absent [goid 5634] [evidence IEA]; All of the contents of a cell…			MGC119769; SPANX-D; dJ171K16.1
ILMN_1654459	SPANXN1	SPANXN1	NO	NM_001009614.1	SPANXN1	X	Homo sapiens SPANX family, member N1 (SPANXN1), mRNA.	SPANX-N1	SPANXN1	4830040	Homo sapiens	RefSeq	ILMN_15038	NM_001009614.2	NM_001009614.2		494118	133922569	NM_001009614.2	NP_001009614.1	4830040	S	286	AAGCAGGATGAAGACCTAGACTTACCTGAAGGCCTAGACTCAGCTGAAGG	+	144145093-144145142	Xq27.3c
ILMN_1720259	SPANXN2	SPANXN2	NO	NM_001009615.1	SPANXN2	X	Homo sapiens SPANX family, member N2 (SPANXN2), mRNA.	SPANX-N2	SPANXN2	2630259	Homo sapiens	RefSeq	ILMN_15295	NM_001009615.1	NM_001009615.1		494119	57634513	NM_001009615.1	NP_001009615.1	2630259	S	930	AGCATACGAAAATAAATTCAAATCAACTGGAGAAGGACCAGTCCCGAGAG	-	142795452-142795501	Xq27.3a				SPANX-N2
ILMN_1691953	SPANXN3	SPANXN3	NO	NM_001009609.1	SPANXN3	X	Homo sapiens SPANX family, member N3 (SPANXN3), mRNA.	SPANX-N3	SPANXN3	450743	Homo sapiens	RefSeq	ILMN_14551	NM_001009609.2	NM_001009609.2		139067	116063532	NM_001009609.2	NP_001009609.1	450743	S	389	GACCTAGGCCCATGTGAAGGACCTTCAAAGGAGGACAAAGATCTAGACTC	-	142596719-142596768	Xq27.3a
ILMN_1808463	SPANXN4	SPANXN4	NO	NM_001009613.1	SPANXN4	X	Homo sapiens SPANX family, member N4 (SPANXN4), mRNA.	SPANX-N4	SPANXN4	2480082	Homo sapiens	RefSeq	ILMN_14909	NM_001009613.2	NM_001009613.2		441525	148806897	NM_001009613.2	NP_001009613.1	2480082	S	307	CCAGCCTACAGAGAGCTCCACTGATCCAATCAAAGAGAAAGGAGACCTAG	+	141949608-141949657	Xq27.3a				SPANX-N4
ILMN_1679348	SPANXN5	SPANXN5	NO	NM_001009616.1	SPANXN5	X	Homo sapiens SPANX family, member N5 (SPANXN5), mRNA.	SPANX-N5	SPANXN5	4390520	Homo sapiens	RefSeq	ILMN_162669	NM_001009616.2	NM_001009616.2		494197	122114543	NM_001009616.2	NP_001009616.1	4390520	S	248	AGGAGGACGAAGGATCCTCACAGGAGGATGAAGACCTAGACTCATCTGCA	-	52842174-52842223	Xp11.22b
ILMN_1702097	SPATA19	SPATA19	NO	NM_174927.1	SPATA19	11	Homo sapiens spermatogenesis associated 19 (SPATA19), mRNA.	spergen1; SPAS1; FLJ25851	SPATA19	3840022	Homo sapiens	RefSeq	ILMN_25885	NM_174927.1	NM_174927.1		219938	28376651	NM_174927.1	NP_777587.1	3840022	S	588	ACAGTGGGGTTACAGGGAGTCATCATCAGCCCTACCCCTTGGCCAACCAC	-	133710745-133710794	11q25d	A semiautonomous, self replicating organelle that occurs in varying numbers, shapes, and sizes in the cytoplasm of virtually all eukaryotic cells. It is notably the site of tissue respiration [goid 5739] [evidence IEA]; The outer, i.e. cytoplasm-facing, lipid bilayer of the mitochondrial envelope [goid 5741] [evidence IEA]; Double layer of lipid molecules that encloses all cells, and, in eukaryot…	The biological process whose specific outcome is the progression of a multicellular organism over time from an initial condition (e.g. a zygote or a young adult) to a later condition (e.g. a multicellular animal or an aged adult) [goid 7275] [evidence IEA]; The process of formation of spermatozoa, including spermatocytogenesis and spermiogenesis [goid 7283] [evidence IEA]; The process whereby rel…		SPAS1; spergen1; FLJ25851
ILMN_1658396	SPEF2	SPEF2	NO	NM_144722.2	SPEF2	5	Homo sapiens sperm flagellar 2 (SPEF2), transcript variant 2, mRNA.	FLJ23164; FLJ23577; MGC102842; KIAA1770; KPL2; FLJ25395	SPEF2	1990181	Homo sapiens	RefSeq	ILMN_26576	NM_144722.3	NM_144722.3		79925	93277100	NM_144722.3	NP_653323.1	1990181	I	2164	GACAGACTAGAGCTACATTACTGAAATTGCCAACTACTAACTGTGTGACC	+	35670586-35670635	5p13.2c			The formation of a protein dimer, a macromolecular structure consists of two noncovalently associated identical or nonidentical subunits [goid 46983] [evidence IEA]	FLJ23164; KIAA1770; FLJ25395
ILMN_1678391	SPEF2	SPEF2	NO	NM_144722.2	SPEF2	5	Homo sapiens sperm flagellar 2 (SPEF2), transcript variant 2, mRNA.	FLJ23164; FLJ23577; MGC102842; KIAA1770; KPL2; FLJ25395	SPEF2	6980630	Homo sapiens	RefSeq	ILMN_26576	NM_144722.3	NM_144722.3		79925	93277100	NM_144722.3	NP_653323.1	6980630	A	1552	CTACCTGCTAACCCCTCAAGAGAACAACTTACAGAACTGGAGAAAAGGGA	+	35667175-35667224	5p13.2c			The formation of a protein dimer, a macromolecular structure consists of two noncovalently associated identical or nonidentical subunits [goid 46983] [evidence IEA]	FLJ23164; KIAA1770; FLJ25395
ILMN_1806003	SPEF2	SPEF2	NO	NM_024867.2	SPEF2	5	Homo sapiens sperm flagellar 2 (SPEF2), transcript variant 1, mRNA.	FLJ23164; MGC102842; FLJ23577; KIAA1770; KPL2; FLJ25395	SPEF2	5130528	Homo sapiens	RefSeq	ILMN_26087	NM_024867.3	NM_024867.3		79925	145699132	NM_024867.3	NP_079143.3	5130528	I	5292	GTTCAAAGGGGGAAGTGAAGCACAGGACTCCAATAGATTTGCCAGCCACC	+	35731625-35731655:35733549-35733567	5p13.2c			The formation of a protein dimer, a macromolecular structure consists of two noncovalently associated identical or nonidentical subunits [goid 46983] [evidence IEA]	FLJ23164; MGC102842; KIAA1770; FLJ25395
ILMN_1687970	SPO11	SPO11	NO	NM_012444.2	SPO11	20	Homo sapiens SPO11 meiotic protein covalently bound to DSB homolog (S. cerevisiae) (SPO11), transcript variant 1, mRNA.	MGC39953	SPO11	6400482	Homo sapiens	RefSeq	ILMN_2883	NM_012444.2	NM_012444.2		23626	38201678	NM_012444.2	NP_036576.1	6400482	I	281	CAAGAAATGAAGCACCTGCATTCACGATAGACAACAGATCAAGCTGGGAA	+	55340352-55340401	20q13.31a	A membrane-bounded organelle of eukaryotic cells in which chromosomes are housed and replicated. In most cells, the nucleus contains all of the cell's chromosomes except the organellar chromosomes, and is the site of RNA synthesis and processing. In some species, or in specialized cell types, RNA metabolism or DNA replication may be absent [goid 5634] [evidence IEA]; A structure composed of a ver…	The chemical reactions and pathways involving DNA, deoxyribonucleic acid, one of the two main types of nucleic acid, consisting of a long, unbranched macromolecule formed from one, or more commonly, two, strands of linked deoxyribonucleotides [goid 6259] [evidence IEA]; Progression through the nuclear division phase of a meiotic cell cycle, the specialized nuclear and cell division in which a sin…	Interacting selectively with DNA (deoxyribonucleic acid) [goid 3677] [pmid 10534401] [evidence TAS]; Interacting selectively with ATP, adenosine 5'-triphosphate, a universally important coenzyme and enzyme regulator [goid 5524] [evidence IEA]; Catalysis of the hydrolysis of various bonds, e.g. C-O, C-N, C-C, phosphoric anhydride bonds, etc. Hydrolase is the systematic name for any enzyme of EC cl…	MGC39953
ILMN_1796655	SPO11	SPO11	NO	NM_198265.1	SPO11	20	Homo sapiens SPO11 meiotic protein covalently bound to DSB homolog (S. cerevisiae) (SPO11), transcript variant 2, mRNA.	MGC39953	SPO11	1940403	Homo sapiens	RefSeq	ILMN_2417	NM_198265.1	NM_198265.1		23626	38201679	NM_198265.1	NP_937998.1	1940403	A	877	GCTCATCATCTCACAGTTCCAGCTATTAGATGGCTTGGTCTTCTCCCTTC	+	55348580-55348629	20q13.31a	A membrane-bounded organelle of eukaryotic cells in which chromosomes are housed and replicated. In most cells, the nucleus contains all of the cell's chromosomes except the organellar chromosomes, and is the site of RNA synthesis and processing. In some species, or in specialized cell types, RNA metabolism or DNA replication may be absent [goid 5634] [evidence IEA]; A structure composed of a ver…	The chemical reactions and pathways involving DNA, deoxyribonucleic acid, one of the two main types of nucleic acid, consisting of a long, unbranched macromolecule formed from one, or more commonly, two, strands of linked deoxyribonucleotides [goid 6259] [evidence IEA]; Progression through the nuclear division phase of a meiotic cell cycle, the specialized nuclear and cell division in which a sin…	Interacting selectively with DNA (deoxyribonucleic acid) [goid 3677] [pmid 10534401] [evidence TAS]; Interacting selectively with ATP, adenosine 5'-triphosphate, a universally important coenzyme and enzyme regulator [goid 5524] [evidence IEA]; Catalysis of the hydrolysis of various bonds, e.g. C-O, C-N, C-C, phosphoric anhydride bonds, etc. Hydrolase is the systematic name for any enzyme of EC cl…	MGC39953
ILMN_2392747	SPO11	SPO11	NO	NM_198265.1	SPO11	20	Homo sapiens SPO11 meiotic protein covalently bound to DSB homolog (S. cerevisiae) (SPO11), transcript variant 2, mRNA.	MGC39953	SPO11	4880519	Homo sapiens	RefSeq	ILMN_2417	NM_198265.1	NM_198265.1		23626	38201679	NM_198265.1	NP_937998.1	4880519	A	1328	GCTGTACTCCAATTTTCTTTGCAAGGCCTTATTCTTGCCTCTATAGAGAC	+	55352081-55352130	20q13.31a	A membrane-bounded organelle of eukaryotic cells in which chromosomes are housed and replicated. In most cells, the nucleus contains all of the cell's chromosomes except the organellar chromosomes, and is the site of RNA synthesis and processing. In some species, or in specialized cell types, RNA metabolism or DNA replication may be absent [goid 5634] [evidence IEA]; A structure composed of a ver…	The chemical reactions and pathways involving DNA, deoxyribonucleic acid, one of the two main types of nucleic acid, consisting of a long, unbranched macromolecule formed from one, or more commonly, two, strands of linked deoxyribonucleotides [goid 6259] [evidence IEA]; Progression through the nuclear division phase of a meiotic cell cycle, the specialized nuclear and cell division in which a sin…	Interacting selectively with DNA (deoxyribonucleic acid) [goid 3677] [pmid 10534401] [evidence TAS]; Interacting selectively with ATP, adenosine 5'-triphosphate, a universally important coenzyme and enzyme regulator [goid 5524] [evidence IEA]; Catalysis of the hydrolysis of various bonds, e.g. C-O, C-N, C-C, phosphoric anhydride bonds, etc. Hydrolase is the systematic name for any enzyme of EC cl…	MGC39953
ILMN_1690680	SSX1	SSX1	NO	NM_005635.2	SSX1	X	Homo sapiens synovial sarcoma, X breakpoint 1 (SSX1), mRNA.	SSRC; MGC5162; MGC150425	SSX1	3310215	Homo sapiens	RefSeq	ILMN_25871	NM_005635.2	NM_005635.2		6756	28559010	NM_005635.2	NP_005626.1	3310215	I	315	AGGCCACAGACTTCCAGGGGAATGATTTTGATAATGACCATAACCGCAGG	+	48002954-48003003	Xp11.23e	The living contents of a cell; the matter contained within (but not including) the plasma membrane, usually taken to exclude large vacuoles and masses of secretory or ingested material. In eukaryotes it includes the nucleus and cytoplasm [goid 5622] [evidence IEA]; A membrane-bounded organelle of eukaryotic cells in which chromosomes are housed and replicated. In most cells, the nucleus contains …	The synthesis of either RNA on a template of DNA or DNA on a template of RNA [goid 6350] [evidence IEA]; Any process that modulates the frequency, rate or extent of DNA-dependent transcription [goid 6355] [evidence IEA]	Interacting selectively with any nucleic acid [goid 3676] [evidence IEA]; The function of a transcription cofactor that represses transcription from a RNA polymerase II promoter; does not bind DNA itself [goid 3714] [pmid 10072425] [evidence TAS]	SSRC; MGC5162; MGC150425
ILMN_1803671	SSX1	SSX1	NO	XM_937476.1	SSX1		PREDICTED: Homo sapiens synovial sarcoma, X breakpoint 1 (SSX1), mRNA.		SSX1	6520279	Homo sapiens	RefSeq	ILMN_137919	XM_937476.1	XM_937476.1		6756	89060738	XM_937476.1	XP_942569.1	6520279	I	6	CAGGACCAAGGGTCCTGTAGCTAGAAAGTCTCAGGCTGTTTCTCTTGCAG			Xp11.23e	The living contents of a cell; the matter contained within (but not including) the plasma membrane, usually taken to exclude large vacuoles and masses of secretory or ingested material. In eukaryotes it includes the nucleus and cytoplasm [goid 5622] [evidence IEA]; A membrane-bounded organelle of eukaryotic cells in which chromosomes are housed and replicated. In most cells, the nucleus contains …	The synthesis of either RNA on a template of DNA or DNA on a template of RNA [goid 6350] [evidence IEA]; Any process that modulates the frequency, rate or extent of DNA-dependent transcription [goid 6355] [evidence IEA]	Interacting selectively with any nucleic acid [goid 3676] [evidence IEA]; The function of a transcription cofactor that represses transcription from a RNA polymerase II promoter; does not bind DNA itself [goid 3714] [pmid 10072425] [evidence TAS]
ILMN_2247572	SSX1	SSX1	NO	NM_005635.2	SSX1	X	Homo sapiens synovial sarcoma, X breakpoint 1 (SSX1), mRNA.	SSRC; MGC5162; MGC150425	SSX1	6480563	Homo sapiens	RefSeq	ILMN_169082	NM_005635.2	NM_005635.2		6756	28559010	NM_005635.2	NP_005626.1	6480563	I	981	GAACAGCACTATCCTCATCTCTCCCCAGATGTGACTACTGAGGGCAGTTC	+	48011551-48011600	Xp11.23e	The living contents of a cell; the matter contained within (but not including) the plasma membrane, usually taken to exclude large vacuoles and masses of secretory or ingested material. In eukaryotes it includes the nucleus and cytoplasm [goid 5622] [evidence IEA]; A membrane-bounded organelle of eukaryotic cells in which chromosomes are housed and replicated. In most cells, the nucleus contains …	The synthesis of either RNA on a template of DNA or DNA on a template of RNA [goid 6350] [evidence IEA]; Any process that modulates the frequency, rate or extent of DNA-dependent transcription [goid 6355] [evidence IEA]	Interacting selectively with any nucleic acid [goid 3676] [evidence IEA]; The function of a transcription cofactor that represses transcription from a RNA polymerase II promoter; does not bind DNA itself [goid 3714] [pmid 10072425] [evidence TAS]	SSRC; MGC5162; MGC150425
ILMN_1665639	SSX2	SSX2	NO	XM_925889.1	SSX2	X	Homo sapiens synovial sarcoma, X breakpoint 2 (SSX2), transcript variant 1, mRNA.	HD21; MGC119055; SSX; HOM-MEL-40; MGC3884; MGC15364	SSX2	5290224	Homo sapiens	RefSeq	ILMN_163873	NM_003147.4	NM_003147.4		6757	28559004	NM_003147.4	NP_003138.3	5290224	A	438	GATCATGCCCAAGAAGCCAGCAGAGGAAGGAAATGATTCGGAGGAAGTGC	-	52746304-52746353	Xp11.22b	The part of a cell or its extracellular environment in which a gene product is located. A gene product may be located in one or more parts of a cell and its location may be as specific as a particular macromolecular complex, that is, a stable, persistent association of macromolecules that function together [goid 5575] [pmid 7951320] [evidence ND ]; The living contents of a cell; the matter contai…	The synthesis of either RNA on a template of DNA or DNA on a template of RNA [goid 6350] [evidence IEA]; Any process that modulates the frequency, rate or extent of DNA-dependent transcription [goid 6355] [pmid 7539744] [evidence NAS]	Interacting selectively with any nucleic acid [goid 3676] [evidence IEA]; Interacting selectively with any protein or protein complex (a complex of two or more proteins that may include other nonprotein molecules) [goid 5515] [pmid 12007189] [evidence IPI]
ILMN_1676207	SSX2	SSX2	NO	NM_175698.1	SSX2	X	Homo sapiens synovial sarcoma, X breakpoint 2 (SSX2), transcript variant 1, mRNA.	HD21; MGC119055; SSX; HOM-MEL-40; MGC3884; MGC15364	SSX2	2850463	Homo sapiens	RefSeq	ILMN_163873	NM_003147.4	NM_003147.4		6757	28559004	NM_003147.4	NP_003138.3	2850463	A	22	CTTTCGATTCTTCCATACTCAGAGTACGCACGGTCTGATTTTCTCTTTGG	-	52752903-52752952	Xp11.22b	The part of a cell or its extracellular environment in which a gene product is located. A gene product may be located in one or more parts of a cell and its location may be as specific as a particular macromolecular complex, that is, a stable, persistent association of macromolecules that function together [goid 5575] [pmid 7951320] [evidence ND ]; The living contents of a cell; the matter contai…	The synthesis of either RNA on a template of DNA or DNA on a template of RNA [goid 6350] [evidence IEA]; Any process that modulates the frequency, rate or extent of DNA-dependent transcription [goid 6355] [pmid 7539744] [evidence NAS]	Interacting selectively with any nucleic acid [goid 3676] [evidence IEA]; Interacting selectively with any protein or protein complex (a complex of two or more proteins that may include other nonprotein molecules) [goid 5515] [pmid 12007189] [evidence IPI]	HD21; MGC119055; SSX; HOM-MEL-40; MGC3884; MGC15364
ILMN_1684697	SSX2	SSX2	NO	XM_937506.1	SSX2	X	Homo sapiens synovial sarcoma, X breakpoint 2 (SSX2), transcript variant 1, mRNA.	HD21; MGC119055; SSX; HOM-MEL-40; MGC3884; MGC15364	SSX2	4490228	Homo sapiens	RefSeq	ILMN_163873	NM_003147.4	NM_003147.4		6757	28559004	NM_003147.4	NP_003138.3	4490228	A	43	GAGTACGCACGGTCTGATTTTCTCTTTGGATTCTTCCAAAATCAGAGTCA	-	52751540-52751544:52752887-52752931	Xp11.22b	The part of a cell or its extracellular environment in which a gene product is located. A gene product may be located in one or more parts of a cell and its location may be as specific as a particular macromolecular complex, that is, a stable, persistent association of macromolecules that function together [goid 5575] [pmid 7951320] [evidence ND ]; The living contents of a cell; the matter contai…	The synthesis of either RNA on a template of DNA or DNA on a template of RNA [goid 6350] [evidence IEA]; Any process that modulates the frequency, rate or extent of DNA-dependent transcription [goid 6355] [pmid 7539744] [evidence NAS]	Interacting selectively with any nucleic acid [goid 3676] [evidence IEA]; Interacting selectively with any protein or protein complex (a complex of two or more proteins that may include other nonprotein molecules) [goid 5515] [pmid 12007189] [evidence IPI]
ILMN_2292723	SSX2	SSX2	NO	NM_003147.4	SSX2	X	Homo sapiens synovial sarcoma, X breakpoint 2 (SSX2), transcript variant 1, mRNA.	HD21; MGC119055; SSX; HOM-MEL-40; MGC3884; MGC15364	SSX2	6620364	Homo sapiens	RefSeq	ILMN_163873	NM_003147.4	NM_003147.4		6757	28559004	NM_003147.4	NP_003138.3	6620364	I	622	CGGTGGAGCAGTCAGAACACACACAACATTGGTCGATTCAGTTTGTCAAC	-	52744609-52744658	Xp11.22b	The part of a cell or its extracellular environment in which a gene product is located. A gene product may be located in one or more parts of a cell and its location may be as specific as a particular macromolecular complex, that is, a stable, persistent association of macromolecules that function together [goid 5575] [pmid 7951320] [evidence ND ]; The living contents of a cell; the matter contai…	The synthesis of either RNA on a template of DNA or DNA on a template of RNA [goid 6350] [evidence IEA]; Any process that modulates the frequency, rate or extent of DNA-dependent transcription [goid 6355] [pmid 7539744] [evidence NAS]	Interacting selectively with any nucleic acid [goid 3676] [evidence IEA]; Interacting selectively with any protein or protein complex (a complex of two or more proteins that may include other nonprotein molecules) [goid 5515] [pmid 12007189] [evidence IPI]	HD21; MGC119055; SSX; HOM-MEL-40; MGC3884; MGC15364
ILMN_2404327	SSX2	SSX2	NO	NM_003147.4	SSX2	X	Homo sapiens synovial sarcoma, X breakpoint 2 (SSX2), transcript variant 1, mRNA.	HD21; MGC119055; SSX; HOM-MEL-40; MGC3884; MGC15364	SSX2	3940168	Homo sapiens	RefSeq	ILMN_163873	NM_003147.4	NM_003147.4		6757	28559004	NM_003147.4	NP_003138.3	3940168	A	826	CCTCAGGGATACGACACATGCCCATGATGAGAAGCAGAACGTGGTGACCT	-	52743243-52743292	Xp11.22b	The part of a cell or its extracellular environment in which a gene product is located. A gene product may be located in one or more parts of a cell and its location may be as specific as a particular macromolecular complex, that is, a stable, persistent association of macromolecules that function together [goid 5575] [pmid 7951320] [evidence ND ]; The living contents of a cell; the matter contai…	The synthesis of either RNA on a template of DNA or DNA on a template of RNA [goid 6350] [evidence IEA]; Any process that modulates the frequency, rate or extent of DNA-dependent transcription [goid 6355] [pmid 7539744] [evidence NAS]	Interacting selectively with any nucleic acid [goid 3676] [evidence IEA]; Interacting selectively with any protein or protein complex (a complex of two or more proteins that may include other nonprotein molecules) [goid 5515] [pmid 12007189] [evidence IPI]	HD21; MGC119055; SSX; HOM-MEL-40; MGC3884; MGC15364
ILMN_1694952	SSX4	SSX4	NO	XM_933702.1	SSX4	X	Homo sapiens synovial sarcoma, X breakpoint 4 (SSX4), transcript variant 2, mRNA.	MGC119056; MGC12411	SSX4	1050458	Homo sapiens	RefSeq	ILMN_25751	NM_175729.1	NM_175729.1		6759	28559012	NM_175729.1	NP_783856.1	1050458	A	340	TGAACGTCCTCAGATGACTTTCGGCAGCCTCCAGAGAATCTTCCCGAAGG	+	48131698-48131746:48136255-48136255	Xp11.23d	The living contents of a cell; the matter contained within (but not including) the plasma membrane, usually taken to exclude large vacuoles and masses of secretory or ingested material. In eukaryotes it includes the nucleus and cytoplasm [goid 5622] [evidence IEA]; The living contents of a cell; the matter contained within (but not including) the plasma membrane, usually taken to exclude large va…	The synthesis of either RNA on a template of DNA or DNA on a template of RNA [goid 6350] [evidence IEA]; Any process that modulates the frequency, rate or extent of DNA-dependent transcription [goid 6355] [evidence IEA]; Any process that modulates the frequency, rate or extent of DNA-dependent transcription [goid 6355] [evidence IEA]	Interacting selectively with any nucleic acid [goid 3676] [evidence IEA]; Interacting selectively with any nucleic acid [goid 3676] [evidence IEA]
ILMN_1717025	SSX4	SSX4	NO	XM_936387.1	SSX4		PREDICTED: Homo sapiens synovial sarcoma, X breakpoint 4, transcript variant 3 (SSX4), mRNA.		SSX4	6860037	Homo sapiens	RefSeq	ILMN_139193	XM_936387.1	XM_936387.1		6759	89065693	XM_936387.1	XP_941480.1	6860037	I	29	GGGGAGGGGAGACTCTGATTTTCCCGCCGAAAGCGTCCCCTTGGATTGGC			Xp11.23d	The living contents of a cell; the matter contained within (but not including) the plasma membrane, usually taken to exclude large vacuoles and masses of secretory or ingested material. In eukaryotes it includes the nucleus and cytoplasm [goid 5622] [evidence IEA]; The living contents of a cell; the matter contained within (but not including) the plasma membrane, usually taken to exclude large va…	The synthesis of either RNA on a template of DNA or DNA on a template of RNA [goid 6350] [evidence IEA]; Any process that modulates the frequency, rate or extent of DNA-dependent transcription [goid 6355] [evidence IEA]; Any process that modulates the frequency, rate or extent of DNA-dependent transcription [goid 6355] [evidence IEA]	Interacting selectively with any nucleic acid [goid 3676] [evidence IEA]; Interacting selectively with any nucleic acid [goid 3676] [evidence IEA]
ILMN_1791645	SSX4	SSX4	NO	XM_942793.1	SSX4		PREDICTED: Homo sapiens synovial sarcoma, X breakpoint 4, transcript variant 4 (SSX4), mRNA.		SSX4	6040605	Homo sapiens	RefSeq	ILMN_139181	XM_942793.1	XM_942793.1		6759	89065691	XM_942793.1	XP_947886.1	6040605	I	1	CAATGAGTGGACTCACAACCTCTGCTGCAGAATGCCCTCATGCGACAGAA			Xp11.23d	The living contents of a cell; the matter contained within (but not including) the plasma membrane, usually taken to exclude large vacuoles and masses of secretory or ingested material. In eukaryotes it includes the nucleus and cytoplasm [goid 5622] [evidence IEA]; The living contents of a cell; the matter contained within (but not including) the plasma membrane, usually taken to exclude large va…	The synthesis of either RNA on a template of DNA or DNA on a template of RNA [goid 6350] [evidence IEA]; Any process that modulates the frequency, rate or extent of DNA-dependent transcription [goid 6355] [evidence IEA]; Any process that modulates the frequency, rate or extent of DNA-dependent transcription [goid 6355] [evidence IEA]	Interacting selectively with any nucleic acid [goid 3676] [evidence IEA]; Interacting selectively with any nucleic acid [goid 3676] [evidence IEA]
ILMN_2278806	SSX4	SSX4	NO	NM_005636.3	SSX4	X	Homo sapiens synovial sarcoma, X breakpoint 4 (SSX4), transcript variant 1, mRNA.	MGC119056; MGC12411	SSX4	2260593	Homo sapiens	RefSeq	ILMN_179151	NM_005636.3	NM_005636.3		6759	28559011	NM_005636.3	NP_005627.1	2260593	I	448	TGGCCCACAAAATGATGGGAAACAGCTGTGCCCCCCGGGAAATCCAAGTA	+	48133791-48133840	Xp11.23d	The living contents of a cell; the matter contained within (but not including) the plasma membrane, usually taken to exclude large vacuoles and masses of secretory or ingested material. In eukaryotes it includes the nucleus and cytoplasm [goid 5622] [evidence IEA]; The living contents of a cell; the matter contained within (but not including) the plasma membrane, usually taken to exclude large va…	The synthesis of either RNA on a template of DNA or DNA on a template of RNA [goid 6350] [evidence IEA]; Any process that modulates the frequency, rate or extent of DNA-dependent transcription [goid 6355] [evidence IEA]; Any process that modulates the frequency, rate or extent of DNA-dependent transcription [goid 6355] [evidence IEA]	Interacting selectively with any nucleic acid [goid 3676] [evidence IEA]; Interacting selectively with any nucleic acid [goid 3676] [evidence IEA]	MGC119056; MGC12411
ILMN_2322346	SSX4	SSX4	NO	NM_175729.1	SSX4	X	Homo sapiens synovial sarcoma, X breakpoint 4 (SSX4), transcript variant 2, mRNA.	MGC119056; MGC12411	SSX4	2260093	Homo sapiens	RefSeq	ILMN_25751	NM_175729.1	NM_175729.1		6759	28559012	NM_175729.1	NP_783856.1	2260093	A	1032	CGATTCCGTTGTATCAGTCACTGACAGTTAATAAACCTTTGCAAACGTTC	+	48137680-48137729	Xp11.23d	The living contents of a cell; the matter contained within (but not including) the plasma membrane, usually taken to exclude large vacuoles and masses of secretory or ingested material. In eukaryotes it includes the nucleus and cytoplasm [goid 5622] [evidence IEA]; The living contents of a cell; the matter contained within (but not including) the plasma membrane, usually taken to exclude large va…	The synthesis of either RNA on a template of DNA or DNA on a template of RNA [goid 6350] [evidence IEA]; Any process that modulates the frequency, rate or extent of DNA-dependent transcription [goid 6355] [evidence IEA]; Any process that modulates the frequency, rate or extent of DNA-dependent transcription [goid 6355] [evidence IEA]	Interacting selectively with any nucleic acid [goid 3676] [evidence IEA]; Interacting selectively with any nucleic acid [goid 3676] [evidence IEA]	MGC119056; MGC12411
ILMN_2291709	SSX4B	SSX4B	NO	NM_001034832.2	SSX4B	X	Homo sapiens synovial sarcoma, X breakpoint 4B (SSX4B), transcript variant 1, mRNA.		SSX4B	2680551	Homo sapiens	RefSeq	ILMN_9301	NM_001034832.2	NM_001034832.2		548313	94983917	NM_001034832.2	NP_001030004.1	2680551	I	394	GCCCAAGAAGCCAGCAGAGGAAGAAAATGGTTTGAAGGAAGTGCCAGAGG	-	48265466-48265515	Xp11.23d
ILMN_2402303	SSX4B	SSX4B	NO	NM_001034832.2	SSX4B	X	Homo sapiens synovial sarcoma, X breakpoint 4B (SSX4B), transcript variant 1, mRNA.		SSX4B	5130615	Homo sapiens	RefSeq	ILMN_9301	NM_001034832.2	NM_001034832.2		548313	94983917	NM_001034832.2	NP_001030004.1	5130615	A	644	CACATGCCCATGATGAGAAGCAGAACGTGGTGACCTTTCACGAACATGGG	-	48262047-48262096	Xp11.23d
ILMN_1680569	SSX5	SSX5	NO	NM_021015.3	SSX5	X	Homo sapiens synovial sarcoma, X breakpoint 5 (SSX5), transcript variant 1, mRNA.	MGC9494	SSX5	2490279	Homo sapiens	RefSeq	ILMN_6527	NM_021015.3	NM_021015.3		6758	28559014	NM_021015.3	NP_066295.3	2490279	A	1062	GCATAGAACAACACTACCCTCCTCTCTTCCCAGATGTGACCACTGAGGGC	-	48045928-48045977	Xp11.23e	The living contents of a cell; the matter contained within (but not including) the plasma membrane, usually taken to exclude large vacuoles and masses of secretory or ingested material. In eukaryotes it includes the nucleus and cytoplasm [goid 5622] [evidence IEA]	The synthesis of either RNA on a template of DNA or DNA on a template of RNA [goid 6350] [evidence IEA]; Any process that modulates the frequency, rate or extent of DNA-dependent transcription [goid 6355] [evidence IEA]	Interacting selectively with any nucleic acid [goid 3676] [evidence IEA]	MGC9494
ILMN_1714818	SSX5	SSX5	NO	NM_021015.3	SSX5	X	Homo sapiens synovial sarcoma, X breakpoint 5 (SSX5), transcript variant 1, mRNA.	MGC9494	SSX5	2600632	Homo sapiens	RefSeq	ILMN_6527	NM_021015.3	NM_021015.3		6758	28559014	NM_021015.3	NP_066295.3	2600632	I	150	GGAATACATTTGGTGAATCTCAGTCCGTTCTGGAAGGTGGGAAGAGAGCC	-	48054488-48054537	Xp11.23e	The living contents of a cell; the matter contained within (but not including) the plasma membrane, usually taken to exclude large vacuoles and masses of secretory or ingested material. In eukaryotes it includes the nucleus and cytoplasm [goid 5622] [evidence IEA]	The synthesis of either RNA on a template of DNA or DNA on a template of RNA [goid 6350] [evidence IEA]; Any process that modulates the frequency, rate or extent of DNA-dependent transcription [goid 6355] [evidence IEA]	Interacting selectively with any nucleic acid [goid 3676] [evidence IEA]	MGC9494
ILMN_1732696	SSX6	SSX6	NO	NM_173357.2	SSX6	X	Homo sapiens synovial sarcoma, X breakpoint 6 (SSX6), mRNA.	dJ54B20.1	SSX6	3840347	Homo sapiens	RefSeq	ILMN_29370	NM_173357.2	NM_173357.2		280657	28559018	NM_173357.2	NP_775493.1	3840347	S	391	GTGGGAATGAGGTTGAACGTCCTCAGATGACTTTTGGCAGGCTCCAGAGA	+	47855672-47855683:47857520-47857557	Xp11.23e	The living contents of a cell; the matter contained within (but not including) the plasma membrane, usually taken to exclude large vacuoles and masses of secretory or ingested material. In eukaryotes it includes the nucleus and cytoplasm [goid 5622] [evidence IEA]; The living contents of a cell; the matter contained within (but not including) the plasma membrane, usually taken to exclude large va…	The synthesis of either RNA on a template of DNA or DNA on a template of RNA [goid 6350] [evidence IEA]; Any process that modulates the frequency, rate or extent of DNA-dependent transcription [goid 6355] [evidence IEA]; Any process that modulates the frequency, rate or extent of DNA-dependent transcription [goid 6355] [evidence IEA]	Interacting selectively with any nucleic acid [goid 3676] [evidence IEA]; Interacting selectively with any nucleic acid [goid 3676] [evidence IEA]	dJ54B20.1
ILMN_2092943	SSX6	SSX6	NO	NM_173357.2	SSX6	X	Homo sapiens synovial sarcoma, X breakpoint 6 (SSX6), mRNA.	dJ54B20.1	SSX6	510021	Homo sapiens	RefSeq	ILMN_177655	NM_173357.2	NM_173357.2		280657	28559018	NM_173357.2	NP_775493.1	510021	S	80	TAGGCGGGAAAATCAGAGTCTCCGTCAGAGTGCTCCTGGTGCCATGAACG	+	47852111-47852133:47854288-47854307:47854308-47854314	Xp11.23e	The living contents of a cell; the matter contained within (but not including) the plasma membrane, usually taken to exclude large vacuoles and masses of secretory or ingested material. In eukaryotes it includes the nucleus and cytoplasm [goid 5622] [evidence IEA]; The living contents of a cell; the matter contained within (but not including) the plasma membrane, usually taken to exclude large va…	The synthesis of either RNA on a template of DNA or DNA on a template of RNA [goid 6350] [evidence IEA]; Any process that modulates the frequency, rate or extent of DNA-dependent transcription [goid 6355] [evidence IEA]; Any process that modulates the frequency, rate or extent of DNA-dependent transcription [goid 6355] [evidence IEA]	Interacting selectively with any nucleic acid [goid 3676] [evidence IEA]; Interacting selectively with any nucleic acid [goid 3676] [evidence IEA]	dJ54B20.1
ILMN_1726257	SSX7	SSX7	NO	NM_173358.2	SSX7	X	Homo sapiens synovial sarcoma, X breakpoint 7 (SSX7), mRNA.		SSX7	4060440	Homo sapiens	RefSeq	ILMN_26039	NM_173358.2	NM_173358.2		280658	28559019	NM_173358.2	NP_775494.1	4060440	S	577	TGCCCTCCAGGAAAACCAAGTACCTCTGAGAAGATTAACAAGACATCCGG	-	52691317-52691318:52694036-52694083	Xp11.22b	The living contents of a cell; the matter contained within (but not including) the plasma membrane, usually taken to exclude large vacuoles and masses of secretory or ingested material. In eukaryotes it includes the nucleus and cytoplasm [goid 5622] [evidence IEA]	The synthesis of either RNA on a template of DNA or DNA on a template of RNA [goid 6350] [evidence IEA]; Any process that modulates the frequency, rate or extent of DNA-dependent transcription [goid 6355] [evidence IEA]	Interacting selectively with any nucleic acid [goid 3676] [evidence IEA]
ILMN_1742097	SSX9	SSX9	NO	XM_937492.1	SSX9	X	Homo sapiens synovial sarcoma, X breakpoint 9 (SSX9), mRNA.		SSX9	6620189	Homo sapiens	RefSeq	ILMN_22792	NM_174962.3	NM_174962.3		280660	148806885	NM_174962.3	NP_777622.1	6620189	A	462	AGTGCCAGAAGCATCTGGCTTACAGAACGATGGGAAACAGCTGTGCCCCC	-	48159108-48159157	Xp11.23e	The living contents of a cell; the matter contained within (but not including) the plasma membrane, usually taken to exclude large vacuoles and masses of secretory or ingested material. In eukaryotes it includes the nucleus and cytoplasm [goid 5622] [evidence IEA]	The synthesis of either RNA on a template of DNA or DNA on a template of RNA [goid 6350] [evidence IEA]; Any process that modulates the frequency, rate or extent of DNA-dependent transcription [goid 6355] [evidence IEA]	Interacting selectively with any nucleic acid [goid 3676] [evidence IEA]
ILMN_1771397	SSX9	SSX9	NO	NM_174962.2	SSX9	X	Homo sapiens synovial sarcoma, X breakpoint 9 (SSX9), mRNA.		SSX9	6110725	Homo sapiens	RefSeq	ILMN_178177	NM_174962.2	NM_174962.2		280660	31581525	NM_174962.2	NP_777622.1	6110725	I	12	CGGGATTGGCTACTTTAAGTTCAGAGTATGCAGACAGACTGCTCCCGGTG	-	48049228-48049246:48050577-48050607	Xp11.23e	The living contents of a cell; the matter contained within (but not including) the plasma membrane, usually taken to exclude large vacuoles and masses of secretory or ingested material. In eukaryotes it includes the nucleus and cytoplasm [goid 5622] [evidence IEA]	The synthesis of either RNA on a template of DNA or DNA on a template of RNA [goid 6350] [evidence IEA]; Any process that modulates the frequency, rate or extent of DNA-dependent transcription [goid 6355] [evidence IEA]	Interacting selectively with any nucleic acid [goid 3676] [evidence IEA]
ILMN_1734645	SUN5	SPAG4L	YES	NM_080675.3	SPAG4L	20	Homo sapiens sperm associated antigen 4-like (SPAG4L), mRNA.	TSARG4; dJ726C3.1; MGC33594	SPAG4L	6290626	Homo sapiens	RefSeq	ILMN_166321	NM_080675.3	NM_080675.3		140732	34222160	NM_080675.3	NP_542406.2	6290626	S	1088	CCCGGGCTTTCAGTGCGGTCAAGGTGAAGATCTCAAGCAACTGGGGGAAC	-	31571695-31571744	20q11.21c	The part of a cell or its extracellular environment in which a gene product is located. A gene product may be located in one or more parts of a cell and its location may be as specific as a particular macromolecular complex, that is, a stable, persistent association of macromolecules that function together [goid 5575] [evidence ND ]	The process of formation of spermatozoa, including spermatocytogenesis and spermiogenesis [goid 7283] [pmid 12621555] [evidence IEP]	Elemental activities, such as catalysis or binding, describing the actions of a gene product at the molecular level. A given gene product may exhibit one or more molecular functions [goid 3674] [evidence ND ]	TSARG4; dJ726C3.1; MGC33594
ILMN_1732189	SYCE1	SYCE1	NO	NM_130784.1	SYCE1	10	Homo sapiens synaptonemal complex central element protein 1 (SYCE1), transcript variant 1, mRNA.	RP11-108K14.6; bA108K14.6; C10orf94	SYCE1	4850750	Homo sapiens	RefSeq	ILMN_10871	NM_130784.1	NM_130784.1		93426	18640753	NM_130784.1	NP_570140.1	4850750	I	79	CCGGCTCGGCATCTACAGCTACTGGCAGGACACGTCCTCACAGAAAATTG	-	135223620-135223647:135231682-135231703	10q26.3f	A structural unit of the synaptonemal complex found between the lateral elements [goid 801] [pmid 15944401] [evidence ISS]; A membrane-bounded organelle of eukaryotic cells in which chromosomes are housed and replicated. In most cells, the nucleus contains all of the cell's chromosomes except the organellar chromosomes, and is the site of RNA synthesis and processing. In some species, or in speci…	The progression of biochemical and morphological phases and events that occur in a cell during successive cell replication or nuclear replication events. Canonically, the cell cycle comprises the replication and segregation of genetic material followed by the division of the cell, but in endocycles or syncytial cells nuclear replication or nuclear division may not be followed by cell division [go…	Interacting selectively with any protein or protein complex (a complex of two or more proteins that may include other nonprotein molecules) [goid 5515] [evidence IEA]	RP11-108K14.6; bA108K14.6; C10orf94
ILMN_1773168	SYCE1	SYCE1	NO	NM_201564.1	SYCE1	10	Homo sapiens synaptonemal complex central element protein 1 (SYCE1), transcript variant 2, mRNA.	RP11-108K14.6; bA108K14.6; C10orf94	SYCE1	6980242	Homo sapiens	RefSeq	ILMN_9688	NM_201564.1	NM_201564.1		93426	42415530	NM_201564.1	NP_963858.1	6980242	A	1819	TGGAATGCAAGTCCCTGCCCAAGCCCAGAGCACACAAGAGGAAGAGGCTG	-	135218847-135218896	10q26.3f	A structural unit of the synaptonemal complex found between the lateral elements [goid 801] [pmid 15944401] [evidence ISS]; A membrane-bounded organelle of eukaryotic cells in which chromosomes are housed and replicated. In most cells, the nucleus contains all of the cell's chromosomes except the organellar chromosomes, and is the site of RNA synthesis and processing. In some species, or in speci…	The progression of biochemical and morphological phases and events that occur in a cell during successive cell replication or nuclear replication events. Canonically, the cell cycle comprises the replication and segregation of genetic material followed by the division of the cell, but in endocycles or syncytial cells nuclear replication or nuclear division may not be followed by cell division [go…	Interacting selectively with any protein or protein complex (a complex of two or more proteins that may include other nonprotein molecules) [goid 5515] [evidence IEA]	RP11-108K14.6; bA108K14.6; C10orf94
ILMN_1791356	SYCE1	SYCE1	NO	NM_201564.1	SYCE1	10	Homo sapiens synaptonemal complex central element protein 1 (SYCE1), transcript variant 2, mRNA.	RP11-108K14.6; bA108K14.6; C10orf94	SYCE1	2850133	Homo sapiens	RefSeq	ILMN_9688	NM_201564.1	NM_201564.1		93426	42415530	NM_201564.1	NP_963858.1	2850133	I	844	CCAGCTGCATGGTTTGCGGGGCTCAGTGCCAAGTGAGAATGCAGGGTCCC	-	135222701-135222750	10q26.3f	A structural unit of the synaptonemal complex found between the lateral elements [goid 801] [pmid 15944401] [evidence ISS]; A membrane-bounded organelle of eukaryotic cells in which chromosomes are housed and replicated. In most cells, the nucleus contains all of the cell's chromosomes except the organellar chromosomes, and is the site of RNA synthesis and processing. In some species, or in speci…	The progression of biochemical and morphological phases and events that occur in a cell during successive cell replication or nuclear replication events. Canonically, the cell cycle comprises the replication and segregation of genetic material followed by the division of the cell, but in endocycles or syncytial cells nuclear replication or nuclear division may not be followed by cell division [go…	Interacting selectively with any protein or protein complex (a complex of two or more proteins that may include other nonprotein molecules) [goid 5515] [evidence IEA]	RP11-108K14.6; bA108K14.6; C10orf94
ILMN_3187623	SYCE1L	SYCE1L	NO	NM_001129979.1	SYCE1L	16	Homo sapiens synaptonemal complex central element protein 1-like (SYCE1L), mRNA.		SYCE1L	3870050	Homo sapiens	RefSeq	ILMN_365460	NM_001129979.1	NM_001129979.1		100130958	194018731	NM_001129979.1	NP_001123451.1	3870050	A	565	ATGGCGGTGAATGACGGGCTGAAGGCGGAGCTGGAGATATTCGGGGAGCA	+	77246250-77246266:77246471-77246503	16q23.1c
ILMN_1756374	SYCP1	SYCP1	NO	NM_003176.2	SYCP1	1	Homo sapiens synaptonemal complex protein 1 (SYCP1), mRNA.	MGC104417; HOM-TES-14; SCP1	SYCP1	580543	Homo sapiens	RefSeq	ILMN_18047	NM_003176.2	NM_003176.2		6847	34878903	NM_003176.2	NP_003167.2	580543	S	3002	GGCCCCTTCATCTCTAACAACCCCTGGATCTACACTGAAGTTTGGAGCTA	+	115338931-115338931:115339026-115339074	1p13.2a	A structural unit of the synaptonemal complex found between the lateral elements [goid 801] [evidence IEA]; A structural unit of the synaptonemal complex that spans the regions between the lateral elements and connects them [goid 802] [evidence IEA]; A structural unit of the synaptonemal complex found between the lateral elements [goid 801] [evidence IEA]; A structural unit of the synaptonemal co…	The cell cycle process whereby the synaptonemal complex is formed. This is a structure that holds paired chromosomes together during prophase I of meiosis and that promotes genetic recombination [goid 7130] [evidence IEA]; The progression of biochemical and morphological phases and events that occur in a cell during successive cell replication or nuclear replication events. Canonically, the cell …	Interacting selectively with any protein or protein complex (a complex of two or more proteins that may include other nonprotein molecules) [goid 5515] [evidence IEA]; Interacting selectively with DNA (deoxyribonucleic acid) [goid 3677] [pmid 1464329] [evidence TAS]; Interacting selectively with any protein or protein complex (a complex of two or more proteins that may include other nonprotein mo…	MGC104417; HOM-TES-14; SCP1
ILMN_2218248	SYCP1	SYCP1	NO	NM_003176.2	SYCP1	1	Homo sapiens synaptonemal complex protein 1 (SYCP1), mRNA.	MGC104417; HOM-TES-14; SCP1	SYCP1	6560471	Homo sapiens	RefSeq	ILMN_176332	NM_003176.2	NM_003176.2		6847	34878903	NM_003176.2	NP_003167.2	6560471	S	3210	GCCAGAGCCAAATTTTATCTGGAAGTTGAGACTTAAAAAATACTTGCATG	+	115339233-115339282	1p13.2a	A structural unit of the synaptonemal complex found between the lateral elements [goid 801] [evidence IEA]; A structural unit of the synaptonemal complex that spans the regions between the lateral elements and connects them [goid 802] [evidence IEA]; A structural unit of the synaptonemal complex found between the lateral elements [goid 801] [evidence IEA]; A structural unit of the synaptonemal co…	The cell cycle process whereby the synaptonemal complex is formed. This is a structure that holds paired chromosomes together during prophase I of meiosis and that promotes genetic recombination [goid 7130] [evidence IEA]; The progression of biochemical and morphological phases and events that occur in a cell during successive cell replication or nuclear replication events. Canonically, the cell …	Interacting selectively with any protein or protein complex (a complex of two or more proteins that may include other nonprotein molecules) [goid 5515] [evidence IEA]; Interacting selectively with DNA (deoxyribonucleic acid) [goid 3677] [pmid 1464329] [evidence TAS]; Interacting selectively with any protein or protein complex (a complex of two or more proteins that may include other nonprotein mo…	MGC104417; HOM-TES-14; SCP1
ILMN_1755638	TAF7L	TAF7L	NO	NM_024885.2	TAF7L	X	Homo sapiens TAF7-like RNA polymerase II, TATA box binding protein (TBP)-associated factor, 50kDa (TAF7L), mRNA.	TAF2Q; dJ738A13.1; FLJ23157	TAF7L	2470500	Homo sapiens	RefSeq	ILMN_13817	NM_024885.2	NM_024885.2		54457	51477717	NM_024885.2	NP_079161.2	2470500	S	2021	CTGTTCAGGTAACAGGACTGCATTCCTGCTCAAGGATGATTCCTTGCTGC	-	100523511-100523560	Xq22.1c	A membrane-bounded organelle of eukaryotic cells in which chromosomes are housed and replicated. In most cells, the nucleus contains all of the cell's chromosomes except the organellar chromosomes, and is the site of RNA synthesis and processing. In some species, or in specialized cell types, RNA metabolism or DNA replication may be absent [goid 5634] [pmid 18029348] [evidence IDA]; A membrane-bo…	Any process that modulates the frequency, rate or extent of DNA-dependent transcription [goid 6355] [evidence IEA]; The biological process whose specific outcome is the progression of a multicellular organism over time from an initial condition (e.g. a zygote or a young adult) to a later condition (e.g. a multicellular animal or an aged adult) [goid 7275] [evidence IEA]; The process of formation …	Any function that supports basal (unregulated) transcription of genes by core RNA polymerase II. Five general transcription factors are necessary and sufficient for such basal transcription in yeast: TFIIB, TFIID, TFIIE, TFIIF, TFIIH and TATA-binding protein (TBF) [goid 16251] [evidence IEA]	TAF2Q; dJ738A13.1; FLJ23157
ILMN_1809750	TDRD1	TDRD1	NO	NM_198795.1	TDRD1	10	Homo sapiens tudor domain containing 1 (TDRD1), mRNA.	FLJ21082	TDRD1	2470722	Homo sapiens	RefSeq	ILMN_162663	NM_198795.1	NM_198795.1		56165	38505160	NM_198795.1	NP_942090.1	2470722	S	3989	TTTATTACTTAAAGGTACCGAAGGAAGGCCAGGTGCAGTGGCTCACGCCC	+	115967380-115967404:115968163-115968187	10q25.3a			Interacting selectively with any nucleic acid [goid 3676] [evidence IEA]; Interacting selectively with zinc (Zn) ions [goid 8270] [evidence IEA]	FLJ21082
ILMN_2175094	TDRD1	TDRD1	NO	NM_198795.1	TDRD1	10	Homo sapiens tudor domain containing 1 (TDRD1), mRNA.	FLJ21082	TDRD1	7150184	Homo sapiens	RefSeq	ILMN_162663	NM_198795.1	NM_198795.1		56165	38505160	NM_198795.1	NP_942090.1	7150184	S	3993	TTACTTAAAGGTACCGAAGGAAGGCCAGGTGCAGTGGCTCACGCCCAGCA	+	115967384-115967404:115968163-115968191	10q25.3a			Interacting selectively with any nucleic acid [goid 3676] [evidence IEA]; Interacting selectively with zinc (Zn) ions [goid 8270] [evidence IEA]	FLJ21082
ILMN_1660261	TDRD6	TDRD6	NO	NM_001010870.1	TDRD6	6	Homo sapiens tudor domain containing 6 (TDRD6), mRNA.	bA446F17.4; DKFZp781I1148; FLJ43850; NY-CO-45; TDR2	TDRD6	3440112	Homo sapiens	RefSeq	ILMN_27519	NM_001010870.1	NM_001010870.1		221400	58197557	NM_001010870.1	NP_001010870.1	3440112	S	6429	GGTGGAAAACAAATTAGGTCTCAGGTTGATGGTGGGGTGTGTTTATAGTG	+	46669762-46669811	6p12.3e			Interacting selectively with any nucleic acid [goid 3676] [evidence IEA]	bA446F17.4; DKFZp781I1148; FLJ43850; NY-CO-45; TDR2
ILMN_1706832	TEKT5	TEKT5	NO	NM_144674.1	TEKT5	16	Homo sapiens tektin 5 (TEKT5), mRNA.	MGC163208; FLJ32871; MGC163210	TEKT5	50091	Homo sapiens	RefSeq	ILMN_20525	NM_144674.1	NM_144674.1		146279	21389568	NM_144674.1	NP_653275.1	50091	S	1276	CCCAACATGGAGCTGTGCAGGGACATCCCGCAGTTGAAGCTGGTGAACGA	-	10721644-10721656:10729621-10729657	16p13.13d	Any of the long, generally straight, hollow tubes of internal diameter 12-15 nm and external diameter 24 nm found in a wide variety of eukaryotic cells; each consists (usually) of 13 protofilaments of polymeric tubulin, staggered in such a manner that the tubulin monomers are arranged in a helical pattern on the microtubular surface, and with the alpha/beta axes of the tubulin subunits parallel t…	A process that is carried out at the cellular level which results in the formation, arrangement of constituent parts, or disassembly of cytoskeletal structures comprising microtubules and their associated proteins [goid 226] [evidence IEA]	The action of a molecule that contributes to the structural integrity of a complex or assembly within or outside a cell [goid 5198] [evidence IEA]	FLJ32871; MGC163208; MGC163210
ILMN_2211235	TEX101	TEX101	NO	NM_031451.3	TEX101	19	Homo sapiens testis expressed 101 (TEX101), mRNA.	GTPR867; SGRG; PRO1884; MGC4766; NYD-SP8	TEX101	1030603	Homo sapiens	RefSeq	ILMN_27346	NM_031451.3	NM_031451.3		83639	20127665	NM_031451.3	NP_113639.3	1030603	S	1368	GGCACTTCTGGGCCTGGGTCTGAGGACATCTTTTTTGACTGGGAGCCTTC	+	48614392-48614441	19q13.31a	The membrane surrounding a cell that separates the cell from its external environment. It consists of a phospholipid bilayer and associated proteins [goid 5886] [evidence IEA]; Tethered to a membrane by a covalently attached anchor, such as a lipid moiety, that is embedded in the membrane. When used to describe a protein, indicates that none of the peptide sequence is embedded in the membrane [go…			GTPR867; SGRG; PRO1884; MGC4766; NYD-SP8
ILMN_1669921	TEX14	TEX14	NO	NM_198393.2	TEX14	17	Homo sapiens testis expressed 14 (TEX14), transcript variant 1, mRNA.		TEX14	2970392	Homo sapiens	RefSeq	ILMN_7591	NM_198393.2	NM_198393.2		56155	57863262	NM_198393.2	NP_938207.2	2970392	I	3353	ACTCCAGACGGTGAATATTTTTACTCCTCGACTGCTCAAGAAAACTTAGC	-	56658978-56659027	17q22d	All of the contents of a cell excluding the plasma membrane and nucleus, but including other subcellular structures [goid 5737] [evidence IEA]	The process of introducing a phosphate group on to a protein [goid 6468] [evidence IEA]	Interacting selectively with a nucleotide, any compound consisting of a nucleoside that is esterified with (ortho)phosphate or an oligophosphate at any hydroxyl group on the ribose or deoxyribose moiety [goid 166] [evidence IEA]; Catalysis of the reaction: ATP + a protein tyrosine = ADP + protein tyrosine phosphate [goid 4713] [evidence IEA]; Interacting selectively with ATP, adenosine 5'-triphos…
ILMN_1685490	TEX14	TEX14	NO	NM_031272.3	TEX14	17	Homo sapiens testis expressed 14 (TEX14), transcript variant 2, mRNA.		TEX14	3890156	Homo sapiens	RefSeq	ILMN_2759	NM_031272.3	NM_031272.3		56155	57863260	NM_031272.3	NP_112562.3	3890156	A	4558	GCTGTCAGGGCAGCAGTTCCAGTTCTGTAAGTCTCACTTTGTTCAGCTGC	-	56634238-56634287	17q22d	All of the contents of a cell excluding the plasma membrane and nucleus, but including other subcellular structures [goid 5737] [evidence IEA]	The process of introducing a phosphate group on to a protein [goid 6468] [evidence IEA]	Interacting selectively with a nucleotide, any compound consisting of a nucleoside that is esterified with (ortho)phosphate or an oligophosphate at any hydroxyl group on the ribose or deoxyribose moiety [goid 166] [evidence IEA]; Catalysis of the reaction: ATP + a protein tyrosine = ADP + protein tyrosine phosphate [goid 4713] [evidence IEA]; Interacting selectively with ATP, adenosine 5'-triphos…
ILMN_1685909	TEX15	TEX15	NO	NM_031271.2	TEX15	8	Homo sapiens testis expressed 15 (TEX15), mRNA.	DKFZP434M2415	TEX15	6620553	Homo sapiens	RefSeq	ILMN_27944	NM_031271.3	NM_031271.3		56154	133778960	NM_031271.3	NP_112561.2	6620553	S	9294	AGTCAGACAGAGCCCTCACAACTGGATAGACCTTTCTCAAGGGTTAGCCC	-	30809370-30809419	8p12e				DKFZP434M2415
ILMN_1651763	TFDP3	TFDP3	NO	NM_016521.2	TFDP3	X	Homo sapiens transcription factor Dp family, member 3 (TFDP3), mRNA.	E2F-like; MGC161639; HCA661; CT30	TFDP3	730255	Homo sapiens	RefSeq	ILMN_22989	NM_016521.2	NM_016521.2		51270	26024208	NM_016521.2	NP_057605.3	730255	S	1262	GGACAACAACGATGACGACCTCAGTGAGAATGACGAGGATGACTGACGTC	-	132351065-132351069:132351070-132351114	Xq26.2b	A membrane-bounded organelle of eukaryotic cells in which chromosomes are housed and replicated. In most cells, the nucleus contains all of the cell's chromosomes except the organellar chromosomes, and is the site of RNA synthesis and processing. In some species, or in specialized cell types, RNA metabolism or DNA replication may be absent [goid 5634] [evidence IEA]; Any complex, distinct from RN…	The synthesis of either RNA on a template of DNA or DNA on a template of RNA [goid 6350] [evidence IEA]; Any process that modulates the frequency, rate or extent of DNA-dependent transcription [goid 6355] [evidence IEA]	The function of binding to a specific DNA sequence in order to modulate transcription. The transcription factor may or may not also interact selectively with a protein or macromolecular complex [goid 3700] [evidence IEA]	E2F-like; MGC161639; HCA661; CT30
ILMN_1705372	THEG	THEG	NO	NM_016585.3	THEG	19	Homo sapiens Theg homolog (mouse) (THEG), transcript variant 1, mRNA.	MGC26138	THEG	3360603	Homo sapiens	RefSeq	ILMN_162214	NM_016585.3	NM_016585.3		51298	40549420	NM_016585.3	NP_057669.1	3360603	I	477	ACGCTGTGGTAAGGGGTATGCCTGGATCTCCCCATGTAAGATGAGCTTGC	-	373955-374004	19p13.3j	A membrane-bounded organelle of eukaryotic cells in which chromosomes are housed and replicated. In most cells, the nucleus contains all of the cell's chromosomes except the organellar chromosomes, and is the site of RNA synthesis and processing. In some species, or in specialized cell types, RNA metabolism or DNA replication may be absent [goid 5634] [evidence IEA]	The biological process whose specific outcome is the progression of a multicellular organism over time from an initial condition (e.g. a zygote or a young adult) to a later condition (e.g. a multicellular animal or an aged adult) [goid 7275] [evidence IEA]; The process of formation of spermatozoa, including spermatocytogenesis and spermiogenesis [goid 7283] [pmid 10747865] [evidence TAS]; The pro…		MGC26138
ILMN_1722789	THEG	THEG	NO	NM_199202.1	THEG	19	Homo sapiens Theg homolog (mouse) (THEG), transcript variant 2, mRNA.	MGC26138	THEG	510156	Homo sapiens	RefSeq	ILMN_9506	NM_199202.1	NM_199202.1		51298	40549421	NM_199202.1	NP_954672.1	510156	A	1029	GCGTCCCCTCGCCTCTATGAGCTTGCCACCCCCAAAAGCATCACCAGAAA	-	362228-362277	19p13.3j	A membrane-bounded organelle of eukaryotic cells in which chromosomes are housed and replicated. In most cells, the nucleus contains all of the cell's chromosomes except the organellar chromosomes, and is the site of RNA synthesis and processing. In some species, or in specialized cell types, RNA metabolism or DNA replication may be absent [goid 5634] [evidence IEA]	The biological process whose specific outcome is the progression of a multicellular organism over time from an initial condition (e.g. a zygote or a young adult) to a later condition (e.g. a multicellular animal or an aged adult) [goid 7275] [evidence IEA]; The process of formation of spermatozoa, including spermatocytogenesis and spermiogenesis [goid 7283] [pmid 10747865] [evidence TAS]; The pro…		MGC26138
ILMN_1729498	TMEFF1	TMEFF1	NO	NM_003692.2	TMEFF1	9	Homo sapiens transmembrane protein with EGF-like and two follistatin-like domains 1 (TMEFF1), mRNA.	C9orf2; H7365	TMEFF1	3120403	Homo sapiens	RefSeq	ILMN_183443	NM_003692.2	NM_003692.2		8577	29568104	NM_003692.2	NP_003683.2	3120403	S	1560	CCACTTCTTCCACAATGACCACAGCAAATGACCAAGCATGAACTAAAGGT	+	102379010-102379059	9q31.1a	The membrane surrounding a cell that separates the cell from its external environment. It consists of a phospholipid bilayer and associated proteins [goid 5886] [evidence IEA]; Penetrating at least one phospholipid bilayer of a membrane. May also refer to the state of being buried in the bilayer with no exposure outside the bilayer. When used to describe a protein, indicates that all or part of t…	The biological process whose specific outcome is the progression of a multicellular organism over time from an initial condition (e.g. a zygote or a young adult) to a later condition (e.g. a multicellular animal or an aged adult) [goid 7275] [evidence IEA]		orf; C9orf2; H7365
ILMN_1730645	TMEFF2	TMEFF2	NO	NM_016192.2	TMEFF2	2	Homo sapiens transmembrane protein with EGF-like and two follistatin-like domains 2 (TMEFF2), mRNA.	TPEF; TENB2; TR; HPP1	TMEFF2	270703	Homo sapiens	RefSeq	ILMN_17013	NM_016192.2	NM_016192.2		23671	12383050	NM_016192.2	NP_057276.2	270703	S	1516	CTAAAGGGAGCATGTTTCACAGTGGCTGGACTACCGAGAGCTTGGACTAC	-	192814990-192815036:192815037-192815039	2q32.3a-q32.3b	The space external to the outermost structure of a cell. For cells without external protective or external encapsulating structures this refers to space outside of the plasma membrane. This term covers the host cell environment outside an intracellular parasite [goid 5576] [evidence IEA]; Double layer of lipid molecules that encloses all cells, and, in eukaryotes, many organelles; may be a single…		Elemental activities, such as catalysis or binding, describing the actions of a gene product at the molecular level. A given gene product may exhibit one or more molecular functions [goid 3674] [evidence ND ]	TPEF; TENB2; TR; HPP1
ILMN_1669709	TMEM108	TMEM108	NO	NM_023943.1	TMEM108	3	Homo sapiens transmembrane protein 108 (TMEM108), mRNA.	MGC3040	TMEM108	6940753	Homo sapiens	RefSeq	ILMN_7801	NM_023943.1	NM_023943.1		66000	45387950	NM_023943.1	NP_076432.1	6940753	S	1814	CCCGCTCCCCAGCCAATGGCGACTATAGAGACACTGGGATGGTCCTTGTT	+	134597414-134597463	3q22.1d	Double layer of lipid molecules that encloses all cells, and, in eukaryotes, many organelles; may be a single or double lipid bilayer; also includes associated proteins [goid 16020] [evidence IEA]; Penetrating at least one phospholipid bilayer of a membrane. May also refer to the state of being buried in the bilayer with no exposure outside the bilayer. When used to describe a protein, indicates …			MGC3040
ILMN_2203147	TMPRSS12	TMPRSS12	NO	NM_182559.1	TMPRSS12	12	Homo sapiens transmembrane protease, serine 12 (TMPRSS12), mRNA.	MGC57341	TMPRSS12	4290504	Homo sapiens	RefSeq	ILMN_16395	NM_182559.1	NM_182559.1		283471	32698939	NM_182559.1	NP_872365.1	4290504	S	795	GGTGATGAAGATGGAGCTTTTGATACTTGCAGGGGTGACAGTGGGGGACC	+	49565406-49565438:49567312-49567328	12q13.13b	Double layer of lipid molecules that encloses all cells, and, in eukaryotes, many organelles; may be a single or double lipid bilayer; also includes associated proteins [goid 16020] [evidence IEA]; Penetrating at least one phospholipid bilayer of a membrane. May also refer to the state of being buried in the bilayer with no exposure outside the bilayer. When used to describe a protein, indicates …	The hydrolysis of a peptide bond or bonds within a protein [goid 6508] [evidence IEA]; The hydrolysis of a peptide bond or bonds within a protein [goid 6508] [evidence IEA]	Catalysis of the hydrolysis of internal, alpha-peptide bonds in a polypeptide chain by a catalytic mechanism that involves a catalytic triad consisting of a serine nucleophile that is activated by a proton relay involving an acidic residue (e.g. aspartate or glutamate) and a basic residue (usually histidine) [goid 4252] [evidence IEA]; Catalysis of the hydrolysis of a peptide bond. A peptide bond…	MGC57341
ILMN_2203149	TMPRSS12	TMPRSS12	NO	NM_182559.1	TMPRSS12	12	Homo sapiens transmembrane protease, serine 12 (TMPRSS12), mRNA.	MGC57341	TMPRSS12	6860139	Homo sapiens	RefSeq	ILMN_16395	NM_182559.1	NM_182559.1		283471	32698939	NM_182559.1	NP_872365.1	6860139	S	1026	CGTGGCCAGATCCTCATAGCTTTATGTTTTGTCATCTTACTAGCAACAAC	+	49567510-49567559	12q13.13b	Double layer of lipid molecules that encloses all cells, and, in eukaryotes, many organelles; may be a single or double lipid bilayer; also includes associated proteins [goid 16020] [evidence IEA]; Penetrating at least one phospholipid bilayer of a membrane. May also refer to the state of being buried in the bilayer with no exposure outside the bilayer. When used to describe a protein, indicates …	The hydrolysis of a peptide bond or bonds within a protein [goid 6508] [evidence IEA]; The hydrolysis of a peptide bond or bonds within a protein [goid 6508] [evidence IEA]	Catalysis of the hydrolysis of internal, alpha-peptide bonds in a polypeptide chain by a catalytic mechanism that involves a catalytic triad consisting of a serine nucleophile that is activated by a proton relay involving an acidic residue (e.g. aspartate or glutamate) and a basic residue (usually histidine) [goid 4252] [evidence IEA]; Catalysis of the hydrolysis of a peptide bond. A peptide bond…	MGC57341
ILMN_2196409	TPPP2	TPPP2	NO	NM_173846.3	TPPP2	14	Homo sapiens tubulin polymerization-promoting protein family member 2 (TPPP2), mRNA.	P18; C14orf8; p25beta; p18	TPPP2	5130754	Homo sapiens	RefSeq	ILMN_21192	NM_173846.3	NM_173846.3		122664	34222240	NM_173846.3	NP_776245.1	5130754	S	364	GACTCATGGAGGGCAAAGACCCAGCCACCACTGGCGCTACTAAAGCAACA	+	20569124-20569164:20569891-20569899	14q11.2c	A membrane-bounded organelle of eukaryotic cells in which chromosomes are housed and replicated. In most cells, the nucleus contains all of the cell's chromosomes except the organellar chromosomes, and is the site of RNA synthesis and processing. In some species, or in specialized cell types, RNA metabolism or DNA replication may be absent [goid 5634] [pmid 18029348] [evidence IDA]; A small, dens…			P18; C14orf8; p25beta; p18
ILMN_1677061	TPTE	TPTE	NO	NM_199261.1	TPTE	21	Homo sapiens transmembrane phosphatase with tensin homology (TPTE), transcript variant 4, mRNA.	PTEN2	TPTE	7100707	Homo sapiens	RefSeq	ILMN_6312	NM_199261.1	NM_199261.1		7179	40549436	NM_199261.1	NP_954870.1	7100707	A	2177	TTCTTCCCCTTCATTTACAAACTGTCTGTTAACAGATTGGCAACCAAGAC	-	9928297-9928346	21p11.2a-p11.1d	Double layer of lipid molecules that encloses all cells, and, in eukaryotes, many organelles; may be a single or double lipid bilayer; also includes associated proteins [goid 16020] [evidence IEA]; Penetrating at least one phospholipid bilayer of a membrane. May also refer to the state of being buried in the bilayer with no exposure outside the bilayer. When used to describe a protein, indicates …	The process of removing one or more phosphoric residues from a protein [goid 6470] [pmid 10598804] [evidence TAS]; The cascade of processes by which a signal interacts with a receptor, causing a change in the level or activity of a second messenger or other downstream target, and ultimately effecting a change in the functioning of the cell [goid 7165] [pmid 10598804] [evidence TAS]	Catalysis of the reaction: protein tyrosine phosphate + H2O = protein tyrosine + phosphate [goid 4725] [pmid 10598804] [evidence TAS]; Catalysis of the hydrolysis of various bonds, e.g. C-O, C-N, C-C, phosphoric anhydride bonds, etc. Hydrolase is the systematic name for any enzyme of EC class 3 [goid 16787] [evidence IEA]	PTEN2
ILMN_2329483	TPTE	TPTE	NO	NM_199260.2	TPTE	21	Homo sapiens transmembrane phosphatase with tensin homology (TPTE), transcript variant 3, mRNA.	PTEN2	TPTE	5340398	Homo sapiens	RefSeq	ILMN_11115	NM_199260.2	NM_199260.2		7179	109689709	NM_199260.2	NP_954869.1	5340398	A	1275	GGCACAGATAGAACAGGAACTATGGTTTGTGCCTTCCTTATTGCCTCTGA	-	10921952-10921995:10933852-10933857	21p11.2a-p11.1d	Double layer of lipid molecules that encloses all cells, and, in eukaryotes, many organelles; may be a single or double lipid bilayer; also includes associated proteins [goid 16020] [evidence IEA]; Penetrating at least one phospholipid bilayer of a membrane. May also refer to the state of being buried in the bilayer with no exposure outside the bilayer. When used to describe a protein, indicates …	The process of removing one or more phosphoric residues from a protein [goid 6470] [pmid 10598804] [evidence TAS]; The cascade of processes by which a signal interacts with a receptor, causing a change in the level or activity of a second messenger or other downstream target, and ultimately effecting a change in the functioning of the cell [goid 7165] [pmid 10598804] [evidence TAS]	Catalysis of the reaction: protein tyrosine phosphate + H2O = protein tyrosine + phosphate [goid 4725] [pmid 10598804] [evidence TAS]; Catalysis of the hydrolysis of various bonds, e.g. C-O, C-N, C-C, phosphoric anhydride bonds, etc. Hydrolase is the systematic name for any enzyme of EC class 3 [goid 16787] [evidence IEA]	PTEN2
ILMN_1654031	TPTE2	TPTE2	NO	NM_199254.1	TPTE2	13	Homo sapiens transmembrane phosphoinositide 3-phosphatase and tensin homolog 2 (TPTE2), transcript variant 3, mRNA.	MGC149231; TPIP	TPTE2	2810725	Homo sapiens	RefSeq	ILMN_25511	NM_199254.1	NM_199254.1		93492	40549424	NM_199254.1	NP_954863.1	2810725	I	331	TATGTTAGAACGACTTTCCAAGTTTGAAGTTGAAGATGCTGAAAATGTTG	-	18954637-18954686	13q12.11a	All of the contents of a cell excluding the plasma membrane and nucleus, but including other subcellular structures [goid 5737] [evidence IEA]; The irregular network of unit membranes, visible only by electron microscopy, that occurs in the cytoplasm of many eukaryotic cells. The membranes form a complex meshwork of tubular channels, which are often expanded into slitlike cavities called cisterna…	The process of removing one or more phosphoric (ester or anhydride) residues from a molecule [goid 16311] [evidence IEA]; The process of removing one or more phosphoric (ester or anhydride) residues from a molecule [goid 16311] [evidence IEA]; The process of removing one or more phosphoric (ester or anhydride) residues from a molecule [goid 16311] [evidence IEA]	Catalysis of the reaction: protein tyrosine phosphate + H2O = protein tyrosine + phosphate [goid 4725] [evidence IEA]; Catalysis of the reaction: phosphatidylinositol-3,4,5-trisphosphate + H2O = phosphatidyl inositol-4,5-bisphosphate + phosphate [goid 16314] [evidence IEA]; Catalysis of the hydrolysis of various bonds, e.g. C-O, C-N, C-C, phosphoric anhydride bonds, etc. Hydrolase is the systemat…	MGC149231; TPIP
ILMN_1785010	TPTE2	TPTE2	NO	NM_130785.2	TPTE2	13	Homo sapiens transmembrane phosphoinositide 3-phosphatase and tensin homolog 2 (TPTE2), transcript variant 1, mRNA.	MGC149231; TPIP	TPTE2	5560468	Homo sapiens	RefSeq	ILMN_8092	NM_130785.2	NM_130785.2		93492	40549428	NM_130785.2	NP_570141.2	5560468	A	1616	ATGTTCTTTCCAACCCCTGCCACATGTTCATGTGTCCTAAGTCTTCCTTG	-	18895085-18895134	13q12.11a	All of the contents of a cell excluding the plasma membrane and nucleus, but including other subcellular structures [goid 5737] [evidence IEA]; The irregular network of unit membranes, visible only by electron microscopy, that occurs in the cytoplasm of many eukaryotic cells. The membranes form a complex meshwork of tubular channels, which are often expanded into slitlike cavities called cisterna…	The process of removing one or more phosphoric (ester or anhydride) residues from a molecule [goid 16311] [evidence IEA]; The process of removing one or more phosphoric (ester or anhydride) residues from a molecule [goid 16311] [evidence IEA]; The process of removing one or more phosphoric (ester or anhydride) residues from a molecule [goid 16311] [evidence IEA]	Catalysis of the reaction: protein tyrosine phosphate + H2O = protein tyrosine + phosphate [goid 4725] [evidence IEA]; Catalysis of the reaction: phosphatidylinositol-3,4,5-trisphosphate + H2O = phosphatidyl inositol-4,5-bisphosphate + phosphate [goid 16314] [evidence IEA]; Catalysis of the hydrolysis of various bonds, e.g. C-O, C-N, C-C, phosphoric anhydride bonds, etc. Hydrolase is the systemat…	MGC149231; TPIP
ILMN_2364369	TPTE2	TPTE2	NO	NM_130785.2	TPTE2	13	Homo sapiens transmembrane phosphoinositide 3-phosphatase and tensin homolog 2 (TPTE2), transcript variant 1, mRNA.	MGC149231; TPIP	TPTE2	6650474	Homo sapiens	RefSeq	ILMN_8092	NM_130785.2	NM_130785.2		93492	40549428	NM_130785.2	NP_570141.2	6650474	A	963	GGACTATGGTTTGTGCCCTCCTTATTGCCTCCGAAATATTTTTAACTGCC	-	18910234-18910283	13q12.11a	All of the contents of a cell excluding the plasma membrane and nucleus, but including other subcellular structures [goid 5737] [evidence IEA]; The irregular network of unit membranes, visible only by electron microscopy, that occurs in the cytoplasm of many eukaryotic cells. The membranes form a complex meshwork of tubular channels, which are often expanded into slitlike cavities called cisterna…	The process of removing one or more phosphoric (ester or anhydride) residues from a molecule [goid 16311] [evidence IEA]; The process of removing one or more phosphoric (ester or anhydride) residues from a molecule [goid 16311] [evidence IEA]; The process of removing one or more phosphoric (ester or anhydride) residues from a molecule [goid 16311] [evidence IEA]	Catalysis of the reaction: protein tyrosine phosphate + H2O = protein tyrosine + phosphate [goid 4725] [evidence IEA]; Catalysis of the reaction: phosphatidylinositol-3,4,5-trisphosphate + H2O = phosphatidyl inositol-4,5-bisphosphate + phosphate [goid 16314] [evidence IEA]; Catalysis of the hydrolysis of various bonds, e.g. C-O, C-N, C-C, phosphoric anhydride bonds, etc. Hydrolase is the systemat…	MGC149231; TPIP
ILMN_1674645	TSGA10	TSGA10	NO	NM_182911.1	TSGA10	2	Homo sapiens testis specific, 10 (TSGA10), mRNA.	CEP4L	TSGA10	3940538	Homo sapiens	RefSeq	ILMN_17583	NM_182911.2	NM_182911.2		80705	141803357	NM_182911.2	NP_878915.1	3940538	I	110	ACGGCTTGTAGACCCCGCGAGAAGGAAGGTCGAGCCAGGTTACCACCAAA	-	99110059-99110071:99124323-99124359	2q11.2c	The part of a cell or its extracellular environment in which a gene product is located. A gene product may be located in one or more parts of a cell and its location may be as specific as a particular macromolecular complex, that is, a stable, persistent association of macromolecules that function together [goid 5575] [evidence ND ]; A membrane-bounded organelle of eukaryotic cells in which chrom…	The process of formation of spermatozoa, including spermatocytogenesis and spermiogenesis [goid 7283] [pmid 11179690] [evidence TAS]; Formation of a prolongation or process extending from a cell, e.g. a flagellum or axon [goid 30031] [evidence IEA]	Elemental activities, such as catalysis or binding, describing the actions of a gene product at the molecular level. A given gene product may exhibit one or more molecular functions [goid 3674] [evidence ND ]	CEP4L
ILMN_1674967	TSGA10	TSGA10	NO	NM_025244.1	TSGA10	2	Homo sapiens testis specific, 10 (TSGA10), mRNA.	CEP4L	TSGA10	1500025	Homo sapiens	RefSeq	ILMN_16441	NM_025244.1	NM_025244.1		80705	13376857	NM_025244.1	NP_079520.1	1500025	A	2642	CACCAGAACGTGCTCACCATCGATCTCCTGACCGAGGCCTAGATCGATCA	-	99001103-99001152	2q11.2c	The part of a cell or its extracellular environment in which a gene product is located. A gene product may be located in one or more parts of a cell and its location may be as specific as a particular macromolecular complex, that is, a stable, persistent association of macromolecules that function together [goid 5575] [evidence ND ]; A membrane-bounded organelle of eukaryotic cells in which chrom…	The process of formation of spermatozoa, including spermatocytogenesis and spermiogenesis [goid 7283] [pmid 11179690] [evidence TAS]; Formation of a prolongation or process extending from a cell, e.g. a flagellum or axon [goid 30031] [evidence IEA]	Elemental activities, such as catalysis or binding, describing the actions of a gene product at the molecular level. A given gene product may exhibit one or more molecular functions [goid 3674] [evidence ND ]	CEP4L
ILMN_1680430	TSGA10	TSGA10	NO	NM_025244.1	TSGA10	2	Homo sapiens testis specific, 10 (TSGA10), mRNA.	CEP4L	TSGA10	5820079	Homo sapiens	RefSeq	ILMN_16441	NM_025244.1	NM_025244.1		80705	13376857	NM_025244.1	NP_079520.1	5820079	I	134	TCCATTGATGGTTTGATAGTGGGCTGGGAAGGAAAGCTGTGTTCCTCCAC	-	99101491-99101540	2q11.2c	The part of a cell or its extracellular environment in which a gene product is located. A gene product may be located in one or more parts of a cell and its location may be as specific as a particular macromolecular complex, that is, a stable, persistent association of macromolecules that function together [goid 5575] [evidence ND ]; A membrane-bounded organelle of eukaryotic cells in which chrom…	The process of formation of spermatozoa, including spermatocytogenesis and spermiogenesis [goid 7283] [pmid 11179690] [evidence TAS]; Formation of a prolongation or process extending from a cell, e.g. a flagellum or axon [goid 30031] [evidence IEA]	Elemental activities, such as catalysis or binding, describing the actions of a gene product at the molecular level. A given gene product may exhibit one or more molecular functions [goid 3674] [evidence ND ]	CEP4L
ILMN_1716236	TSPY1	TSPY1	NO	NM_003308.2	TSPY1	Y	Homo sapiens testis specific protein, Y-linked 1 (TSPY1), mRNA.	pJA923; TSPY; DYS14	TSPY1	4250097	Homo sapiens	RefSeq	ILMN_29670	NM_003308.2	NM_003308.2		7258	13324673	NM_003308.2	NP_003299.1	4250097	S	21	TTAGGGGGCGCCTGGAAGCCCGCGCATGCGCCCTGAGGGCTCGCTGACCT	+	9914584-9914609:9914610-9914633	Yp11.2c	A membrane-bounded organelle of eukaryotic cells in which chromosomes are housed and replicated. In most cells, the nucleus contains all of the cell's chromosomes except the organellar chromosomes, and is the site of RNA synthesis and processing. In some species, or in specialized cell types, RNA metabolism or DNA replication may be absent [goid 5634] [evidence IEA]; A membrane-bounded organelle …	The aggregation, arrangement and bonding together of a nucleosome, the beadlike structural units of eukaryotic chromatin composed of histones and DNA [goid 6334] [evidence IEA]; The aggregation, arrangement and bonding together of a nucleosome, the beadlike structural units of eukaryotic chromatin composed of histones and DNA [goid 6334] [evidence IEA]; The aggregation, arrangement and bonding to…	Elemental activities, such as catalysis or binding, describing the actions of a gene product at the molecular level. A given gene product may exhibit one or more molecular functions [goid 3674] [pmid 3479749] [evidence ND ]	pJA923; TSPY; DYS14
ILMN_2186846	TSPY1	TSPY1	NO	NM_003308.2	TSPY1	Y	Homo sapiens testis specific protein, Y-linked 1 (TSPY1), mRNA.	pJA923; TSPY; DYS14	TSPY1	4850424	Homo sapiens	RefSeq	ILMN_29670	NM_003308.2	NM_003308.2		7258	13324673	NM_003308.2	NP_003299.1	4850424	S	679	CAGAATAAAGTGATTACCAAGGAATATCTGGTGAACATCACAGAATACAG	+	9915977-9916020:9916122-9916127	Yp11.2c	A membrane-bounded organelle of eukaryotic cells in which chromosomes are housed and replicated. In most cells, the nucleus contains all of the cell's chromosomes except the organellar chromosomes, and is the site of RNA synthesis and processing. In some species, or in specialized cell types, RNA metabolism or DNA replication may be absent [goid 5634] [evidence IEA]; A membrane-bounded organelle …	The aggregation, arrangement and bonding together of a nucleosome, the beadlike structural units of eukaryotic chromatin composed of histones and DNA [goid 6334] [evidence IEA]; The aggregation, arrangement and bonding together of a nucleosome, the beadlike structural units of eukaryotic chromatin composed of histones and DNA [goid 6334] [evidence IEA]; The aggregation, arrangement and bonding to…	Elemental activities, such as catalysis or binding, describing the actions of a gene product at the molecular level. A given gene product may exhibit one or more molecular functions [goid 3674] [pmid 3479749] [evidence ND ]	pJA923; TSPY; DYS14
ILMN_1693860	TSPY2	TSPY2	NO	NM_022573.1	TSPY2	Y	Homo sapiens testis specific protein, Y-linked 2 (TSPY2), mRNA.	TSPYQ1; MGC103998	TSPY2	3420670	Homo sapiens	RefSeq	ILMN_13085	NM_022573.1	NM_022573.1		64591	13435134	NM_022573.1	NP_072095.1	3420670	S	2	GCTTTCCTTCGCGCGCAGTCCCTTAGGGGGCGCAATGGAAGCCCCGGCAT	+	6174265-6174309:6174310-6174314	Yp11.2i	A membrane-bounded organelle of eukaryotic cells in which chromosomes are housed and replicated. In most cells, the nucleus contains all of the cell's chromosomes except the organellar chromosomes, and is the site of RNA synthesis and processing. In some species, or in specialized cell types, RNA metabolism or DNA replication may be absent [goid 5634] [evidence IEA]; A membrane-bounded organelle …	The aggregation, arrangement and bonding together of a nucleosome, the beadlike structural units of eukaryotic chromatin composed of histones and DNA [goid 6334] [evidence IEA]; The aggregation, arrangement and bonding together of a nucleosome, the beadlike structural units of eukaryotic chromatin composed of histones and DNA [goid 6334] [evidence IEA]; The biological process whose specific outco…		TSPYQ1; MGC103998
ILMN_2063254	TSPY2	TSPY2	NO	NM_022573.2	TSPY2	Y	Homo sapiens testis specific protein, Y-linked 2 (TSPY2), mRNA.	TSPYQ1; MGC103998	TSPY2	3850326	Homo sapiens	RefSeq	ILMN_13085	NM_022573.2	NM_022573.2		64591	118918416	NM_022573.2	NP_072095.2	3850326	S	1022	GTTACAGCCATATGCAGGACAGCAGTACTCAGCATGGTCTTATGCACAGG	+	6116915-6116964	Yp11.2i	A membrane-bounded organelle of eukaryotic cells in which chromosomes are housed and replicated. In most cells, the nucleus contains all of the cell's chromosomes except the organellar chromosomes, and is the site of RNA synthesis and processing. In some species, or in specialized cell types, RNA metabolism or DNA replication may be absent [goid 5634] [evidence IEA]; A membrane-bounded organelle …	The aggregation, arrangement and bonding together of a nucleosome, the beadlike structural units of eukaryotic chromatin composed of histones and DNA [goid 6334] [evidence IEA]; The aggregation, arrangement and bonding together of a nucleosome, the beadlike structural units of eukaryotic chromatin composed of histones and DNA [goid 6334] [evidence IEA]; The biological process whose specific outco…		TSPYQ1; MGC103998
ILMN_2197750	TSPY3	TSPY3	NO	NM_001077697.1	TSPY3	Y	Homo sapiens testis specific protein, Y-linked 3 (TSPY3), mRNA.		TSPY3	2060767	Homo sapiens	RefSeq	ILMN_175459	NM_001077697.1	NM_001077697.1		728137	118026928	NM_001077697.1	NP_001071165.1	2060767	S	265	GAGGAGGGCCTCGTGGAGCGGCGGGAGGAGGCCCAGCGGGCACAGCAGGC	+	9236313-9236362	Yp11.2c
ILMN_1791637	TSSK6	TSSK6	NO	NM_032037.2	TSSK6	19	Homo sapiens testis-specific serine kinase 6 (TSSK6), mRNA.	FLJ24002; TSSK4; SSTK	TSSK6	990678	Homo sapiens	RefSeq	ILMN_13276	NM_032037.2	NM_032037.2		83983	51477706	NM_032037.2	NP_114426.1	990678	S	1312	GAGACCAGAGGGGACGGAAGCATTGCGCCTGCGCGGAACTCTCAGCCTCT	-	19625108-19625157	19p13.11a		The process of introducing a phosphate group on to a protein [goid 6468] [pmid 15870294] [evidence IDA]; The biological process whose specific outcome is the progression of a multicellular organism over time from an initial condition (e.g. a zygote or a young adult) to a later condition (e.g. a multicellular animal or an aged adult) [goid 7275] [evidence IEA]; The process of formation of spermato…	Interacting selectively with a nucleotide, any compound consisting of a nucleoside that is esterified with (ortho)phosphate or an oligophosphate at any hydroxyl group on the ribose or deoxyribose moiety [goid 166] [evidence IEA]; Interacting selectively with magnesium (Mg) ions [goid 287] [pmid 15870294] [evidence IDA]; Catalysis of the reaction: ATP + a protein serine/threonine = ADP + protein s…	FLJ24002; TSSK4; SSTK
ILMN_1788166	TTK	TTK	NO	NM_003318.3	TTK	6	Homo sapiens TTK protein kinase (TTK), mRNA.	PYT; MPS1L1; FLJ38280; ESK	TTK	5870725	Homo sapiens	RefSeq	ILMN_24472	NM_003318.3	NM_003318.3		7272	34303964	NM_003318.3	NP_003309.2	5870725	S	2511	CTGGGCCAACTTGTTGGTCTGAATTCTCCTAACTCCATTTTGAAAGCTGC	+	80807086-80807135	6q14.1d	The array of microtubules and associated molecules that forms between opposite poles of a eukaryotic cell during mitosis or meiosis and serves to move the duplicated chromosomes apart [goid 5819] [pmid 10366450] [evidence TAS]	The process of introducing a phosphate group on to a protein [goid 6468] [evidence IEA]; A process that is carried out at the cellular level which results in the formation, arrangement of constituent parts, or disassembly of the microtubule spindle during a mitotic cell cycle [goid 7052] [pmid 7737118] [evidence TAS]; A signal transduction based surveillance mechanism that ensures the fidelity of…	Catalysis of the transfer of a phosphate group, usually from ATP, to a substrate molecule [goid 16301] [evidence IEA]; Interacting selectively with a nucleotide, any compound consisting of a nucleoside that is esterified with (ortho)phosphate or an oligophosphate at any hydroxyl group on the ribose or deoxyribose moiety [goid 166] [evidence IEA]; Catalysis of the reaction: ATP + a protein serine/…	PYT; MPS1L1; FLJ38280; ESK
ILMN_2091221	TULP2	TULP2	NO	NM_003323.1	TULP2	19	Homo sapiens tubby like protein 2 (TULP2), mRNA.	TUBL2	TULP2	3290167	Homo sapiens	RefSeq	ILMN_20602	NM_003323.1	NM_003323.1		7288	4507736	NM_003323.1	NP_003314.1	3290167	S	1425	GTTGCACAACAAAACCCCGTCGTGGGACAAGGAGAACGGTGTCTACACGC	-	54077166-54077215	19q13.33a		The series of events required for an organism to receive a visual stimulus, convert it to a molecular signal, and recognize and characterize the signal. Visual stimuli are detected in the form of photons and are processed to form an image [goid 7601] [pmid 9096357] [evidence TAS]		TUBL2
ILMN_3223807	VENTXP1	VENTXP1	NO	NR_001559.2	VENTXP1	X	Homo sapiens VENT homeobox (Xenopus laevis) pseudogene 1 (VENTXP1), non-coding RNA.		VENTXP1	6200551	Homo sapiens	RefSeq	ILMN_370654	NR_001559.2	NR_001559.2		139538	216547912	NR_001559.2		6200551	A	4	TCTGACTCCATGCCTCCCACACACGCGGTCTGTGCAGCTAACACCAGGCG	+	26576457-26576506	Xp21.3c
ILMN_3231823	VENTXP1	VENTXP1	NO	NR_001559.2	VENTXP1	X	Homo sapiens VENT homeobox (Xenopus laevis) pseudogene 1 (VENTXP1), non-coding RNA.		VENTXP1	3190553	Homo sapiens	RefSeq	ILMN_370654	NR_001559.2	NR_001559.2		139538	216547912	NR_001559.2		3190553	I	2290	CAGTGATACTGTCCCATCATTCCCCAGTCTTACTTTTCTATCCTGGGGGC	+	26578743-26578792	Xp21.3c
ILMN_1672582	XAGE1B	XAGE1B	NO	XM_927237.1	XAGE1B	X	Homo sapiens X antigen family, member 1B (XAGE1B), transcript variant 1, mRNA.		XAGE1B	6330753	Homo sapiens	RefSeq	ILMN_306853	NM_001097595.1	NM_001097595.1		653220	148225603	NM_001097595.1	NP_001091064.1	6330753	I	319	CCGAGTCCCAGAAGCACCTGGAACCCCGACAGAAGATTCTGGACTCCCCA	+	52239292-52239341	Xp11.22b
ILMN_1691494	XAGE1B	XAGE1B	NO	NM_133430.1	XAGE1B	X	Homo sapiens X antigen family, member 1B (XAGE1B), transcript variant 1, mRNA.		XAGE1B	5220753	Homo sapiens	RefSeq	ILMN_306853	NM_001097595.1	NM_001097595.1		653220	148225603	NM_001097595.1	NP_001091064.1	5220753	A	541	TGCGCGACATGGAAGGTGATCTGCAAGAGCTGCATCAGTCAAACACCGGG	+	52241127-52241176	Xp11.22b				XAGE-1; GAGED2
ILMN_1678116	XAGE1E	XAGE1E	NO	XM_931959.1	XAGE1E	X	Homo sapiens X antigen family, member 1E (XAGE1E), transcript variant 2, mRNA.		XAGE1E	6350458	Homo sapiens	RefSeq	ILMN_306902	NM_001097604.1	NM_001097604.1		653067	147903921	NM_001097604.1	NP_001091073.1	6350458	I	9	GAAGGAGCATAGGACAGGGCAAGGCGGGATAAGGAGGGGCACCACAGCCC	+	52255707-52255756	Xp11.22b
ILMN_1660375	XAGE2	XAGE2	NO	XM_927227.1	XAGE2	X	Homo sapiens X antigen family, member 2 (XAGE2), mRNA.	GAGED3; XAGE-2	XAGE2	1440286	Homo sapiens	RefSeq	ILMN_21434	NM_130777.1	NM_130777.1		9502	19747282	NM_130777.1	NP_570133.1	1440286	I	602	GTGAAGGGAAATCACAGGTTTAAAGGAAGATAAGCTGAAACAACACAAAC	-	52397137-52397164:52397165-52397186	Xp11.22b
ILMN_1794761	XAGE2	XAGE2	NO	NM_130777.1	XAGE2	X	Homo sapiens X antigen family, member 2 (XAGE2), mRNA.	GAGED3; XAGE-2	XAGE2	3830634	Homo sapiens	RefSeq	ILMN_21434	NM_130777.1	NM_130777.1		9502	19747282	NM_130777.1	NP_570133.1	3830634	S	667	TATTTTACTTTAAAATATCTTAATAAAGTTTTAAGCTTTTCTCCAAAAAA	-	52387093-52387096:52397076-52397121	Xp11.22b				XAGE-2; GAGED3
ILMN_1680454	XAGE3	XAGE3	NO	NM_133179.1	XAGE3	X	Homo sapiens X antigen family, member 3 (XAGE3), transcript variant 1, mRNA.	XAGE-3; PLAC6; GAGED4; pp9012; MGC71925	XAGE3	4560768	Homo sapiens	RefSeq	ILMN_15202	NM_133179.1	NM_133179.1		170626	19747270	NM_133179.1	NP_573440.1	4560768	I	5	GGGTGTGAGGGTCGCGTTCCTGCTGTCTGGACTTTTTCTGTCCCACTGAG	-	52913770-52913819	Xp11.22b				XAGE-3; PLAC6; GAGED4; pp9012; MGC71925
ILMN_1782271	XAGE3	XAGE3	NO	NM_130776.1	XAGE3	X	Homo sapiens X antigen family, member 3 (XAGE3), transcript variant 2, mRNA.	XAGE-3; PLAC6; GAGED4; pp9012; MGC71925	XAGE3	6960564	Homo sapiens	RefSeq	ILMN_21317	NM_130776.1	NM_130776.1		170626	19747268	NM_130776.1	NP_570132.1	6960564	I	2	AGCATTCAGAAGGCACACATACTTACACTTGCCCTGAGACTTAGTTCGAA	-	52913006-52913055	Xp11.22b				XAGE-3; PLAC6; GAGED4; pp9012; MGC71925
ILMN_1691092	XAGE-4	XAGE-4	NO	XM_932510.1	XAGE-4	X	PREDICTED: Homo sapiens XAGE-4 protein (XAGE-4), mRNA.		XAGE-4	670451	Homo sapiens	RefSeq	ILMN_31785	XM_932510.1	XM_932510.1		139629	89059770	XM_932510.1	XP_937603.1	670451	I	345	GGGTGGTTGTCAGTCAGCTGCTTGACTTAGTGCAGGCCTCCATGTCTGCA	-	55695457-55695506	Xp11.21a
ILMN_1815698	XAGE-4	XAGE-4	NO	XM_932510.1	XAGE-4	X	PREDICTED: Homo sapiens XAGE-4 protein (XAGE-4), mRNA.		XAGE-4	450494	Homo sapiens	RefSeq	ILMN_31785	XM_932510.1	XM_932510.1		139629	89059770	XM_932510.1	XP_937603.1	450494	A	25	CTGGCAGAGGTGTACAGTGAGGAGGGCCCAGTGCTGTGTGGCAACTTCTC	-	55700599-55700648	Xp11.21a
ILMN_1667847	XAGE5	XAGE5	NO	NM_130775.1	XAGE5	X	Homo sapiens X antigen family, member 5 (XAGE5), mRNA.	GAGED5; MGC119800; XAGE-5; MGC119799	XAGE5	460301	Homo sapiens	RefSeq	ILMN_17398	NM_130775.1	NM_130775.1		170627	19747272	NM_130775.1	NP_570131.1	460301	S	1	TGGAAGTGCTCAAGTGTGGTATACACTCAGGTGCATTTTTCCAATCACAA	+	52857953-52858002	Xp11.22b				GAGED5; MGC119800; XAGE-5; MGC119799
[truncated: 2 more rows]
