# Supplementary material for: SV-BR-1-GM, a Clinically Effective GM-CSF-Secreting Breast Cancer Cell Line, Expresses an Immune Signature and Directly Activates CD4+ T Lymphocytes
Source: Front Immunol. 2018 May 15;9:776. doi: 10.3389/fimmu.2018.00776 (PMC5962696; doi:10.3389/fimmu.2018.00776)
Supplement: Data Sheet 5 — Genes retained after the low- and medium in silico filtration steps are shown. [file Data_Sheet_5.XLSX]

## Sheet: Low and Med Stringency
	SV-BR-1-GM, a Clinically Effective GM-CSF-Secreting Breast Cancer Cell Line, Expresses an Immune Signature and Directly Activates CD4+ T Lymphocytes
	Supplementary Data Sheet 5: Low- and Medium-Stringency Filtration
	Illumina Probe Annotation: An effort was made to verify, or, if necessary, assign the "official" Gene Symbols (adapted by the NCBI/HUGO Gene Nomenclature Commitee) to Illumina probe identifiers (Probe IDs) lacking this information. For this mapping approach, Gene IDs (NCBI) associated with Probe IDs were used as "common denominators" between the Illumina probes and the Gene Symbols (NCBI). Altern…
	Low Stringency > 1.5 x Bckgr AND > 1.5 x Max(Normal) 588 Genes			Medium Stringency > 5.0 x Bckgr AND > 1.5 x Max(Normal) 353 Genes
	Gene Symbol (NCBI)	Gene ID (NCBI)		Gene Symbol (NCBI)	Gene ID (NCBI)
	AAMDC	28971		AAMDC	28971
	AARD	441376		AARD	441376
	AARS	16		AARS	16
	ABCD1	215		ACP1	52
	ABHD12	26090		ACP2	53
	ACP1	52		ACSF2	80221
	ACP2	53		ACTR1B	10120
	ACSF2	80221		ADAM15	8751
	ACTR1B	10120		ADAR	103
	ADAM15	8751		ADGRL1	22859
	ADAR	103		AIFM1	9131
	ADGRL1	22859		AKR1B10	57016
	ADM2	79924		AKR1C2	1646
	ADSSL1	122622		AKR1C4	1109
	AFMID	125061		ALDH1B1	219
	AGT	183		ALDH3A2	224
	AIFM1	9131		ALDH3B2	222
	AKIRIN1	79647		ALDH9A1	223
	AKR1B10	57016		ALDOA	226
	AKR1B15	441282		ALG8	79053
	AKR1C2	1646		ANAPC11	51529
	AKR1C4	1109		ANKRD46	157567
	ALDH1B1	219		ANKRD9	122416
	ALDH3A2	224		APIP	51074
	ALDH3B2	222		ARL4A	10124
	ALDH5A1	7915		ARPC5L	81873
	ALDH9A1	223		ASPSCR1	79058
	ALDOA	226		ASS1	445
	ALG8	79053		ASS1P11	340274
	AMER1	139285		ASS1P13	341230
	ANAPC11	51529		ATF6	22926
	ANGPT1	284		ATG3	64422
	ANKRD46	157567		ATP5EP2	432369
	ANKRD9	122416		ATP6AP1	537
	ANOS1	3730		ATP6V0E2	155066
	APIP	51074		ATPAF1	64756
	APLP1	333		ATRAID	51374
	AQP11	282679		AZIN1	51582
	AR	367		BEX1	55859
	ARHGEF19	128272		BLVRB	645
	ARL4A	10124		BOLA3	388962
	ARMCX6	54470		BRINP1	1620
	ARPC5L	81873		C21orf33	8209
	ARPIN	348110		CALB2	794
	ASCL2	430		CALCA	796
	ASPSCR1	79058		CAP2	10486
	ASS1	445		CARD17	440068
	ASS1P11	340274		CAT	847
	ASS1P13	341230		CBX2	84733
	ATF6	22926		CD163L1	283316
	ATG3	64422		CD79B	974
	ATP10B	23120		CD83	9308
	ATP5EP2	432369		CD99L2	83692
	ATP5G1	516		CDC42EP4	23580
	ATP6AP1	537		CDC42SE1	56882
	ATP6V0E2	155066		CDK5RAP1	51654
	ATP6V1E2	90423		CDK5RAP2	55755
	ATP6V1G2	534		CENPB	1059
	ATPAF1	64756		CENPM	79019
	ATPAF2	91647		CENPN	55839
	ATRAID	51374		CGA	1081
	AZIN1	51582		CKMT1A	548596
	B9D1	27077		CKMT1B	1159
	BEX1	55859		CKS1B	1163
	BLVRB	645		CLNS1A	1207
	BMP5	653		CLP1	10978
	BMP7	655		CNFN	84518
	BMS1P8	653557		CNIH1	10175
	BOLA3	388962		CNOT11	55571
	BRINP1	1620		CNPY2	10330
	BTF3L4	91408		COA1	55744
	C11orf86	254439		COA5	493753
	C14orf80	283643		COL8A1	1295
	C16orf92	146378		COX5A	9377
	C21orf33	8209		COX5B	1329
	C3orf38	285237		COX7C	1350
	C7orf13	129790		CPS1	1373
	CA9	768		CRABP2	1382
	CABLES2	81928		CRIP2	1397
	CALB2	794		CUEDC1	404093
	CALCA	796		CXXC5	51523
	CALCB	797		CYB561	1534
	CAMK2G	818		CYSRT1	375791
	CAMKMT	79823		DAG1	1605
	CAP2	10486		DBT	1629
	CARD16	114769		DCAF10	79269
	CARD17	440068		DDIT3	1649
	CASP14	23581		DGCR6	8214
	CAT	847		DHCR24	1718
	CBX2	84733		DIO2	1734
	CCNC	892		DIS3L	115752
	CD163L1	283316		DNASE2	1777
	CD36	948		DNLZ	728489
	CD79B	974		DOLPP1	57171
	CD83	9308		DPM1	8813
	CD99L2	83692		DYNLL2	140735
	CDC42EP4	23580		E2F2	1870
	CDC42SE1	56882		ECHS1	1892
	CDK5RAP1	51654		EEF1A2	1917
	CDK5RAP2	55755		EIF3H	8667
	CDKN2A	1029		EIF4E3	317649
	CELSR3	1951		EIF5	1983
	CEMIP	57214		ERBB2	2064
	CENPB	1059		ERP29	10961
	CENPL	91687		EXOSC3	51010
	CENPM	79019		EXT1	2131
	CENPN	55839		F8A1	8263
	CERCAM	51148		FAF1	11124
	CGA	1081		FAM206A	54942
	CHAC1	79094		FBXO10	26267
	CHMP2A	27243		FLAD1	80308
	CKMT1A	548596		FOLR1	2348
	CKMT1B	1159		FOXC1	2296
	CKS1B	1163		FUCA2	2519
	CLGN	1047		G6PD	2539
	CLNS1A	1207		GALK1	2584
	CLP1	10978		GAPDH	2597
	CLPSL2	389383		GAPDHP33	644237
	CNFN	84518		GARS	2617
	CNGB1	1258		GLB1	2720
	CNIH1	10175		GLMP	112770
	CNIH2	254263		GMDS	2762
	CNOT11	55571		GMPPB	29925
	CNPY2	10330		GNG10	2790
	CNTNAP2	26047		GPNMB	10457
	COA1	55744		GPR37	2861
	COA5	493753		GPS1	2873
	COL8A1	1295		GPT2	84706
	COX15	1355		GRHL2	79977
	COX5A	9377		GRHPR	9380
	COX5B	1329		GSDMC	56169
	COX7C	1350		HAX1	10456
	CPS1	1373		HCP5	10866
	CPT1C	126129		HEXB	3074
	CRABP2	1382		HIST1H2BJ	8970
	CRIM1	51232		HIST1H2BK	85236
	CRIP2	1397		HIST1H3G	8355
	CSMD1	64478		HIST1H4H	8365
	CUEDC1	404093		HIST2H4A	8370
	CXXC5	51523		HMCES	56941
	CYB561	1534		HNRNPL	3191
	CYSRT1	375791		HSPB11	51668
	DAG1	1605		HTATSF1P2	401233
	DBP	1628		IDH1	3417
	DBT	1629		IFI30	10437
	DCAF10	79269		IGFBP5	3488
	DDIT3	1649		ILVBL	10994
	DDX28	55794		IMPA2	3613
	DGCR6	8214		INIP	58493
	DGUOK	1716		INTS4	92105
	DHCR24	1718		INTS4P2	644619
	DHRS11	79154		INTS7	25896
	DHRS2	10202		ITPR1	3708
	DIO2	1734		KAT14	57325
	DIS3L	115752		KCTD5	54442
	DNAJC22	79962		KDELR1	10945
	DNASE2	1777		KIAA2013	90231
	DNLZ	728489		KLC1	3831
	DOLPP1	57171		KLHL13	90293
	DPM1	8813		KRT19	3880
	DYNLL2	140735		KRT81	3887
	E2F2	1870		KRT86	3892
	EBAG9	9166		KRT8P47	644743
	ECHS1	1892		KYNU	8942
	EEF1A2	1917		LAGE3	8270
	EFEMP1	2202		LGALS3BP	3959
	EFNA4	1945		LOC100288911	100288911
	EGFL7	51162		LOC728138	728138
	EIF3H	8667		LRPPRC	10128
	EIF4E3	317649		LRRC26	389816
	EIF5	1983		LYPD3	27076
	ELMO1	9844		LYRM2	57226
	EPB41L1	2036		MAL2	114569
	ERBB2	2064		MAN1B1	11253
	ERP27	121506		MANBA	4126
	ERP29	10961		MAP7	9053
	EVPL	2125		MAPK4	5596
	EXOSC3	51010		MAPKAP1	79109
	EXT1	2131		MARC1	64757
	F8A1	8263		MED10	84246
	FADS2	9415		MED19	219541
	FAF1	11124		MED30	90390
	FAM120C	54954		MESP1	55897
	FAM178B	51252		MGAT4A	11320
	FAM206A	54942		MGST3	4259
	FAM207BP	729535		MIEN1	84299
	FAM217B	63939		MKKS	8195
	FAM69B	138311		MOCOS	55034
	FAM71E1	112703		MRPL16	54948
	FBXO10	26267		MRPL51	51258
	FGF21	26291		MRPS11	64963
	FLAD1	80308		MRPS7	51081
	FLJ46906	441172		MRRF	92399
	FLYWCH2	114984		MSRB1	51734
	FOLR1	2348		MSRB2	22921
	FOXC1	2296		MTHFD2	10797
	FOXD2-AS1	84793		NAA20	51126
	FRMPD1	22844		NARS2	79731
	FUCA2	2519		NDUFA1	4694
	G6PD	2539		NDUFA4L2	56901
	GALK1	2584		NDUFA6	4700
	GAPDH	2597		NDUFA8	4702
	GAPDHP33	644237		NDUFAF3	25915
	GAR1	54433		NDUFB10	4716
	GARS	2617		NDUFC1	4717
	GATB	5188		NMRAL1	57407
	GCHFR	2644		NOL3	8996
	GINS4	84296		NOMO1	23420
	GJA5	2702		NOV	4856
	GLB1	2720		NQO1	1728
	GLMP	112770		OGFOD3	79701
	GMDS	2762		OSBP	5007
	GMPPB	29925		OSGIN1	29948
	GNG10	2790		OSTC	58505
	GNPTAB	79158		OSTCP2	646567
	GPC5	2262		P4HB	5034
	GPNMB	10457		PABPC1	26986
	GPR37	2861		PABPC1P4	341315
	GPS1	2873		PAK1	5058
	GPT2	84706		PAQR4	124222
	GRAMD1B	57476		PBX3	5090
	GRB2	2885		PCCB	5096
	GRB7	2886		PCNT	5116
	GRHL2	79977		PDCD6	10016
	GRHPR	9380		PDE8B	8622
	GSDMC	56169		PDHA1	5160
	HAX1	10456		PDHB	5162
	HCP5	10866		PDIA6	10130
	HEXA	3073		PDRG1	81572
	HEXB	3074		PGAP3	93210
	HIST1H2BJ	8970		PGD	5226
	HIST1H2BK	85236		PHGDH	26227
	HIST1H3F	8968		PIGK	10026
	HIST1H3G	8355		PIR	8544
	HIST1H4H	8365		PITX1	5307
	HIST2H4A	8370		PLOD1	5351
	HIST2H4B	554313		POLR1E	64425
	HLTF	6596		POP5	51367
	HMCES	56941		PRAME	23532
	HNRNPL	3191		PRDX1	5052
	HPN	3249		PRDX2	7001
	HRK	8739		PRDX4	10549
	HSD17B8	7923		PRELID3B	51012
	HSPB11	51668		PSAT1	29968
	HTATSF1P2	401233		PSAT1P3	729779
	IDH1	3417		PSMB7	5695
	IFI30	10437		PSMD10	5716
	IFT122	55764		PTGES2	80142
	IGFBP5	3488		PXDN	7837
	IL15	3600		PYCR1	5831
	ILVBL	10994		RABGAP1	23637
	IMPA2	3613		RAD51C	5889
	INIP	58493		RAP1GAP	5909
	INPP4A	3631		RARS2	57038
	INTS4	92105		RFC5	5985
	INTS4P2	644619		RHOBTB3	22836
	INTS7	25896		RNASET2	8635
	ITGB1BP1	9270		RNF182	221687
	ITPR1	3708		RNF19A	25897
	IVD	3712		ROMO1	140823
	JPH3	57338		RP9	6100
	KAT14	57325		RPL35P2	646766
	KATNAL2	83473		RPL36A	6173
	KCNG1	3755		RSF1	51773
	KCTD21	283219		S100P	6286
	KCTD5	54442		SAPCD2	89958
	KDELR1	10945		SCPEP1	59342
	KIAA1210	57481		SCRG1	11341
	KIAA2013	90231		SDHA	6389
	KITLG	4254		SELENBP1	8991
	KLC1	3831		SEPHS2	22928
	KLF10	7071		SERPINA5	5104
	KLHL13	90293		SETP14	389168
	KLHL35	283212		SEZ6L2	26470
	KMT5A	387893		SHB	6461
	KRT19	3880		SHMT1	6470
	KRT80	144501		SIVA1	10572
	KRT81	3887		SLC25A10	1468
	KRT86	3892		SLC25A51	92014
	KRT8P47	644743		SLC2A8	29988
	KYNU	8942		SLC31A1	1317
	L2HGDH	79944		SLC35A2	7355
	LACTB2	51110		SLC3A2	6520
	LAGE3	8270		SLC48A1	55652
	LGALS3BP	3959		SLC6A9	6536
	LHPP	64077		SLC9A3R1	9368
	LHX2	9355		SMU1	55234
	LINC00467	84791		SNRPB2	6629
	LINC01132	100506810		SOD1	6647
	LINC01348	731656		SPINT2	10653
	LINGO1	84894		SQSTM1	8878
	LMNB1	4001		SRXN1	140809
	LMO1	4004		SSR4	6748
	LOC100288911	100288911		ST8SIA6-AS1	100128098
	LOC339539	339539		STARD3	10948
	LOC494141	494141		STEAP4	79689
	LOC728138	728138		STX3	6809
	LRPPRC	10128		SUSD2	56241
	LRRC26	389816		SWI5	375757
	LYPD3	27076		SYBU	55638
	LYRM2	57226		SYNE4	163183
	LYSMD1	388695		TALDO1	6888
	MAL2	114569		TBCD	6904
	MAN1B1	11253		TBL1X	6907
	MANBA	4126		TCTN1	79600
	MAP7	9053		TENM4	26011
	MAPK4	5596		TESC	54997
	MAPK8IP2	23542		TFAP2C	7022
	MAPKAP1	79109		THAP12	5612
	MARC1	64757		TIMM10	26519
	MB	4151		TK1	7083
	MCTP2	55784		TMC6	11322
	MED10	84246		TMED10P1	286102
	MED19	219541		TMED3	23423
	MED30	90390		TMED4	222068
	MESP1	55897		TMEM131	23505
	MEST	4232		TMEM205	374882
	METTL4	64863		TMEM238	388564
	MGAT4A	11320		TMEM268	203197
	MGST3	4259		TMEM9	252839
	MIEN1	84299		TMX2	51075
	MINDY4	84182		TNFRSF11B	4982
	MKKS	8195		TNPO1	3842
	MME	4311		TNS3	64759
	MMP15	4324		TOMM5	401505
	MNX1	3110		TRIB3	57761
	MNX1-AS1	645249		TRMT10B	158234
	MOCOS	55034		TSEN15	116461
	MRPL16	54948		TSKU	25987
	MRPL51	51258		TSPAN3	10099
	MRPS11	64963		TSPAN4	7106
	MRPS7	51081		TSR2	90121
	MRRF	92399		TSTD1	100131187
	MSRB1	51734		TXN	7295
	MSRB2	22921		UBB	7314
	MTHFD2	10797		UBE2I	7329
	MVB12B	89853		UBE2L6	9246
	NAA20	51126		UBE2M	9040
	NARS2	79731		UBR5	51366
	NDUFA1	4694		UNC50	25972
	NDUFA4L2	56901		UQCRQ	27089
	NDUFA6	4700		URM1	81605
	NDUFA8	4702		UST	10090
	NDUFAF3	25915		UTP23	84294
	NDUFB10	4716		VPS45	11311
	NDUFC1	4717		VWA1	64856
	NDUFC2	4718		WARS	7453
	NINJ2	4815		WDR61	80349
	NMRAL1	57407		XPOT	11260
	NOL3	8996		ZBTB5	9925
	NOMO1	23420		ZCCHC17	51538
	NOV	4856		ZDHHC5	25921
	NPR3	4883		ZNF467	168544
	NQO1	1728
	NR3C2	4306
	NTNG1	22854
	NUDT6	11162
	NUP210	23225
	NXPH4	11247
	OGFOD3	79701
	OLFM1	10439
	OSBP	5007
	OSBPL1A	114876
	OSGIN1	29948
	OSTC	58505
	OSTCP2	646567
	OXCT1	5019
	P2RY6	5031
	P4HB	5034
	PABPC1	26986
	PABPC1P4	341315
	PAK1	5058
	PALMD	54873
	PAQR4	124222
	PAX6	5080
	PBX3	5090
	PCCB	5096
	PCDH20	64881
	PCK2	5106
	PCNT	5116
	PCSK1N	27344
	PDCD6	10016
	PDE4D	5144
	PDE7B	27115
	PDE8B	8622
	PDHA1	5160
	PDHB	5162
	PDIA6	10130
	PDPK1	5170
	PDRG1	81572
	PDXDC1	23042
	PECR	55825
	PGAP3	93210
	PGD	5226
	PHGDH	26227
	PIAS2	9063
	PIGK	10026
	PIR	8544
	PITX1	5307
	PKMYT1	9088
	PLAC1	10761
	PLEKHB2	55041
	PLIN4	729359
	PLOD1	5351
	PLPPR4	9890
	PODXL2	50512
	POLR1E	64425
	POP5	51367
	PPARGC1A	10891
	PPP2R2C	5522
	PRAME	23532
	PRDX1	5052
	PRDX2	7001
	PRDX4	10549
	PRELID3B	51012
	PSAT1	29968
	PSAT1P3	729779
	PSCA	8000
	PSMB7	5695
	PSMD10	5716
	PSMD5	5711
	PSPH	5723
	PTGES2	80142
	PTK6	5753
	PXDN	7837
	PXMP4	11264
	PYCR1	5831
	PYROXD2	84795
	RABGAP1	23637
	RAC3	5881
	RAD51C	5889
	RAP1GAP	5909
	RARS2	57038
	RCOR2	283248
	RERG	85004
	RFC5	5985
	RHOBTB3	22836
	RHOF	54509
	RNASET2	8635
	RNF182	221687
	RNF19A	25897
	RNF213	57674
	RNF41	10193
	RNFT1	51136
	ROMO1	140823
	RP9	6100
	RPL35P2	646766
	RPL36A	6173
	RRM2B	50484
	RSF1	51773
	S100P	6286
	SAPCD2	89958
	SCAMP5	192683
	SCG2	7857
	SCPEP1	59342
	SCRG1	11341
	SDHA	6389
	SDSL	113675
	SELENBP1	8991
	SEPHS2	22928
	SEPT6	23157
	SERPINA5	5104
	SERPINI1	5274
	SETP14	389168
	SEZ6L2	26470
	SHB	6461
	SHMT1	6470
	SIRT5	23408
	SIVA1	10572
	SLC16A14	151473
	SLC24A3	57419
	SLC25A10	1468
	SLC25A51	92014
	SLC29A4	222962
	SLC2A4RG	56731
	SLC2A8	29988
	SLC31A1	1317
	SLC35A2	7355
	SLC35F6	54978
	SLC3A2	6520
	SLC47A1	55244
	SLC48A1	55652
	SLC6A9	6536
	SLC9A3R1	9368
	SMAD6	4091
	SMC4	10051
	SMG8	55181
	SMOC1	64093
	SMU1	55234
	SNCG	6623
	SNORD16	595097
	SNRPB2	6629
	SOD1	6647
	SPINT2	10653
	SPRYD4	283377
	SPTLC3	55304
	SQSTM1	8878
	SRXN1	140809
	SSR4	6748
	ST8SIA6-AS1	100128098
	STARD3	10948
	STEAP4	79689
	STK35	140901
	STRBP	55342
	STX3	6809
	SUSD2	56241
	SWI5	375757
	SYBU	55638
	SYNE4	163183
	SYNGR1	9145
	TALDO1	6888
	TBCD	6904
	TBL1X	6907
	TBX1	6899
	TCAP	8557
	TCTN1	79600
	TENM4	26011
	TESC	54997
	TFAP2C	7022
	THAP12	5612
	THAP12P1	728748
	THEM4	117145
	TIGD7	91151
	TIMM10	26519
	TIMP2	7077
	TK1	7083
	TMC6	11322
	TMED10P1	286102
	TMED3	23423
	TMED4	222068
	TMEM131	23505
	TMEM192	201931
	TMEM205	374882
	TMEM238	388564
	TMEM268	203197
	TMEM74B	55321
	TMEM9	252839
	TMX2	51075
	TNFRSF11B	4982
	TNPO1	3842
	TNS3	64759
	TOMM5	401505
	TPRG1	285386
	TRAPPC6A	79090
	TRIB3	57761
	TRMT10B	158234
	TRPV6	55503
	TSEN15	116461
	TSKU	25987
	TSPAN3	10099
	TSPAN4	7106
	TSR2	90121
	TSTD1	100131187
	TTC13	79573
	TXN	7295
	UBB	7314
	UBE2I	7329
	UBE2L6	9246
	UBE2M	9040
	UBR5	51366
	UNC119	9094
	UNC50	25972
	UQCRQ	27089
	URM1	81605
	USP35	57558
	UST	10090
	UTP23	84294
	VPS45	11311
	VWA1	64856
	WARS	7453
	WDR61	80349
	WWP2	11060
	XPOT	11260
	YWHAZ	7534
	ZBTB5	9925
	ZCCHC17	51538
	ZDHHC5	25921
	ZIC2	7546
	ZNF200	7752
	ZNF296	162979
	ZNF35	7584
	ZNF467	168544
	ZNF664	144348
	ZNF695	57116
	ZNF706	51123
	ZNF77	58492
	ZNF777	27153
	ZSCAN31	64288
